# Supplementary material for: IDICAP: A Novel Tool for Integrating Drug Intervention Based on Cancer Panel
Source: J Pers Med. 2016 Oct 28;6(4):19. doi: 10.3390/jpm6040019 (PMC5198058; doi:10.3390/jpm6040019)
Supplement: Supplementary file 1 [file jpm-06-00019-s001.xlsx]

## Sheet: Table S1
Table S1. Breast Cancer Panel
Gene Symbol	Description
BRCA1	BRCA1, DNA repair associated
BRCA2	BRCA2, DNA repair associated
TP53	Tumor protein p53
PTEN	Phosphatase and tension homolog
STK11	Serine/threonine kinase 11
CDH1	Cadherin 1
PALB2	Partner and localizer of BRCA2
CHEK2	Checkpoint kinase 2
ATM	ATM serine/threonine kinase
NBN	Nibrin
BARD1	BRCA1 associated RING domain 1

## Sheet: Table S2
Table S2. Ovarian Cancer Panel
Gene Symbol	Description
BRCA1	BRCA1, DNA repair associated
BRCA2	BRCA2, DNA repair associated
MLH1	MutL homolog 1
MSH2	MutS homolog 2
MSH6	MutS homolog 6
PMS2	PMS1 homolog 2, mismatch repair system component
EPCAM	Epithelial cell adhesion molecule
TP53	Tumor protein p53
STK11	Serine/threonine kinase 11
PALB2	Partner and localizer of BRCA2
BARD1	BRCA1 associated RING domain 1
BRIP1	BRCA1 interacting protein C-terminal helicase 1
RAD51C	RAD51 paralog C
RAD51D	RAD51 paralog D

## Sheet: Table S3
Table S3. A Comprehensive Oncogene Cancer Panel
Gene Symbol	Description
ABL1	ABL proto-oncogene 1, non-receptor tyrosine kinase
AKT1	v-akt murine thymoma viral oncogene homolog 1
ALK	anaplastic lymphoma receptor tyrosine kinase
ATM	ATM serine/threonine kinase
AURKA	aurora kinase A
BCL2	B-cell CLL/lymphoma 2
BCL6	B-cell CLL/lymphoma 6
BCR	breakpoint cluster region
BRAF	B-Raf proto-oncogene, serine/threonine kinase
BRCA1	breast cancer 1
BRCA2	breast cancer 2
CCND1	cyclin D1
CCNE1	cyclin E1
CDK4	cyclin-dependent kinase 4
CEBPA	CCAAT/enhancer binding protein alpha
CRLF2	cytokine receptor-like factor 2
CTNNB1	catenin beta 1
DDR2	discoidin domain receptor tyrosine kinase 2
DNMT3A	DNA (cytosine-5-)-methyltransferase 3 alpha
EGFR	epidermal growth factor receptor
ERBB2	erb-b2 receptor tyrosine kinase 2
ESR1	estrogen receptor 1
ETV6	ETS variant 6
FGFR1	fibroblast growth factor receptor 1
FGFR2	fibroblast growth factor receptor 2
FGFR3	fibroblast growth factor receptor 3
FLT3	fms related tyrosine kinase 3
GNA11	G protein subunit alpha 11
GNAQ	G protein subunit alpha q
HRAS	Harvey rat sarcoma viral oncogene homolog
IDH1	isocitrate dehydrogenase 1
IDH2	isocitrate dehydrogenase 2
JAK1	Janus kinase 1
JAK2	Janus kinase 2
KIT	kit oncogene
KRAS	Kirsten rat sarcoma viral oncogene homolog
MAP2K1	mitogen-activated protein kinase kinase 1
MET	MET proto-oncogene, receptor tyrosine kinase
MLL	lysine methyltransferase 2A
MPL	MPL proto-oncogene, thrombopoietin receptor
MYC	v-myc avian myelocytomatosis viral oncogene homolog
NF1	neurofibromin 1
NPM1	nucleophosmin
NRAS	neuroblastoma RAS viral oncogene homolog
PDGFRA	platelet derived growth factor receptor alpha
PDGFRB	platelet derived growth factor receptor beta
PIK3CA	phosphatidylinositol-4,5-bisphosphate 3-kinase catalytic subunit alpha
PTCH1	patched 1
PTEN	phosphatase and tensin homolog
RARA	retinoic acid receptor alpha
RET	ret proto-oncogene
ROS1	ROS proto-oncogene 1, receptor tyrosine kinase
RUNX1	runt related transcription factor 1
SMO	smoothened, frizzled class receptor
TP53	tumor protein p53
TSC1	tuberous sclerosis 1

## Sheet: Table S4
Table S4. Cancer MeSH terms
ABDOMINAL NEOPLASMS
ABERRANT CRYPT FOCI
ACANTHOMA
ACROSPIROMA
ACTH SYNDROME, ECTOPIC
ACTH-SECRETING PITUITARY ADENOMA
ADAMANTINOMA
ADENOCARCINOMA
ADENOCARCINOMA IN SITU
ADENOCARCINOMA, BRONCHIOLO-ALVEOLAR
ADENOCARCINOMA, CLEAR CELL
ADENOCARCINOMA, FOLLICULAR
ADENOCARCINOMA, MUCINOUS
ADENOCARCINOMA, PAPILLARY
ADENOCARCINOMA, SCIRRHOUS
ADENOCARCINOMA, SEBACEOUS
ADENOFIBROMA
ADENOLYMPHOMA
ADENOMA
ADENOMA, ACIDOPHIL
ADENOMA, BASOPHIL
ADENOMA, BILE DUCT
ADENOMA, CHROMOPHOBE
ADENOMA, ISLET CELL
ADENOMA, LIVER CELL
ADENOMA, OXYPHILIC
ADENOMA, PLEOMORPHIC
ADENOMA, SWEAT GLAND
ADENOMA, VILLOUS
ADENOMATOID TUMOR
ADENOMATOSIS, PULMONARY
ADENOMATOUS POLYPOSIS COLI
ADENOMATOUS POLYPS
ADENOMYOEPITHELIOMA
ADENOMYOMA
ADENOSARCOMA
ADRENAL CORTEX NEOPLASMS
ADRENAL GLAND NEOPLASMS
ADRENAL REST TUMOR
ADRENOCORTICAL ADENOMA
ADRENOCORTICAL CARCINOMA
AMELOBLASTOMA
ANAL GLAND NEOPLASMS
ANAPLASIA
ANGIOFIBROMA
ANGIOKERATOMA
ANGIOLIPOMA
ANGIOMYOLIPOMA
ANGIOMYOMA
ANTI-N-METHYL-D-ASPARTATE RECEPTOR ENCEPHALITIS
ANUS NEOPLASMS
APPENDICEAL NEOPLASMS
APUDOMA
ARACHNOID CYSTS
ASTROCYTOMA
ATYPICAL SQUAMOUS CELLS OF THE CERVIX
AVIAN LEUKOSIS
BASAL CELL NEVUS SYNDROME
BILE DUCT NEOPLASMS
BILIARY TRACT NEOPLASMS
BIRT-HOGG-DUBE SYNDROME
BLAST CRISIS
BONE CYSTS
BONE CYSTS, ANEURYSMAL
BONE MARROW NEOPLASMS
BONE NEOPLASMS
BOWEN'S DISEASE
BRAIN NEOPLASMS
BRAIN STEM NEOPLASMS
BRANCHIOMA
BREAST CYST
BREAST NEOPLASMS
BREAST NEOPLASMS, MALE
BRENNER TUMOR
BRONCHIAL NEOPLASMS
BRONCHOGENIC CYST
BURKITT LYMPHOMA
BUSCHKE-LOWENSTEIN TUMOR
CARCINOGENESIS
CARCINOID HEART DISEASE
CARCINOID TUMOR
CARCINOMA
CARCINOMA 256, WALKER
CARCINOMA IN SITU
CARCINOMA, ACINAR CELL
CARCINOMA, ADENOID CYSTIC
CARCINOMA, ADENOSQUAMOUS
CARCINOMA, BASAL CELL
CARCINOMA, BASOSQUAMOUS
CARCINOMA, BRONCHOGENIC
CARCINOMA, BROWN-PEARCE
CARCINOMA, DUCTAL
CARCINOMA, DUCTAL, BREAST
CARCINOMA, EHRLICH TUMOR
CARCINOMA, EMBRYONAL
CARCINOMA, ENDOMETRIOID
CARCINOMA, GIANT CELL
CARCINOMA, HEPATOCELLULAR
CARCINOMA, INTRADUCTAL, NONINFILTRATING
CARCINOMA, ISLET CELL
CARCINOMA, KREBS 2
CARCINOMA, LARGE CELL
CARCINOMA, LEWIS LUNG
CARCINOMA, LOBULAR
CARCINOMA, MEDULLARY
CARCINOMA, MERKEL CELL
CARCINOMA, MUCOEPIDERMOID
CARCINOMA, NEUROENDOCRINE
CARCINOMA, NON-SMALL-CELL LUNG
CARCINOMA, PANCREATIC DUCTAL
CARCINOMA, PAPILLARY
CARCINOMA, PAPILLARY, FOLLICULAR
CARCINOMA, RENAL CELL
CARCINOMA, SIGNET RING CELL
CARCINOMA, SKIN APPENDAGE
CARCINOMA, SMALL CELL
CARCINOMA, SQUAMOUS CELL
CARCINOMA, TRANSITIONAL CELL
CARCINOMA, VERRUCOUS
CARCINOSARCOMA
CARNEY COMPLEX
CAROTID BODY TUMOR
CECAL NEOPLASMS
CELL TRANSFORMATION, NEOPLASTIC
CELL TRANSFORMATION, VIRAL
CEMENTOMA
CENTRAL NERVOUS SYSTEM CYSTS
CENTRAL NERVOUS SYSTEM NEOPLASMS
CENTRAL NERVOUS SYSTEM VENOUS ANGIOMA
CEREBELLAR NEOPLASMS
CEREBRAL VENTRICLE NEOPLASMS
CERVICAL INTRAEPITHELIAL NEOPLASIA
CHALAZION
CHOLANGIOCARCINOMA
CHOLEDOCHAL CYST
CHONDROBLASTOMA
CHONDROMA
CHONDROMATOSIS
CHONDROSARCOMA
CHONDROSARCOMA, MESENCHYMAL
CHORDOMA
CHORIOCARCINOMA
CHORIOCARCINOMA, NON-GESTATIONAL
CHOROID NEOPLASMS
CHOROID PLEXUS NEOPLASMS
COCARCINOGENESIS
COLLOID CYSTS
COLONIC NEOPLASMS
COLORECTAL NEOPLASMS
COLORECTAL NEOPLASMS, HEREDITARY NONPOLYPOSIS
COMMON BILE DUCT NEOPLASMS
COMPOSITE LYMPHOMA
CONJUNCTIVAL NEOPLASMS
CRANIAL NERVE NEOPLASMS
CRANIOPHARYNGIOMA
CYSTADENOCARCINOMA
CYSTADENOCARCINOMA, MUCINOUS
CYSTADENOCARCINOMA, PAPILLARY
CYSTADENOCARCINOMA, SEROUS
CYSTADENOFIBROMA
CYSTADENOMA
CYSTADENOMA, MUCINOUS
CYSTADENOMA, PAPILLARY
CYSTADENOMA, SEROUS
CYSTS
DENDRITIC CELL SARCOMA, FOLLICULAR
DENDRITIC CELL SARCOMA, INTERDIGITATING
DENTIGEROUS CYST
DENYS-DRASH SYNDROME
DERMATOFIBROSARCOMA
DERMOID CYST
DESMOPLASTIC SMALL ROUND CELL TUMOR
DIGESTIVE SYSTEM NEOPLASMS
DUODENAL NEOPLASMS
DYSGERMINOMA
DYSPLASTIC NEVUS SYNDROME
EAR NEOPLASMS
ECCRINE POROCARCINOMA
ENDOCRINE GLAND NEOPLASMS
ENDODERMAL SINUS TUMOR
ENDOMETRIAL NEOPLASMS
ENDOMETRIAL STROMAL TUMORS
ENTEROPATHY-ASSOCIATED T-CELL LYMPHOMA
ENZOOTIC BOVINE LEUKOSIS
EPENDYMOMA
EPIDERMAL CYST
EPIDURAL NEOPLASMS
ERYTHROPLASIA
ESOPHAGEAL CYST
ESOPHAGEAL NEOPLASMS
ESTHESIONEUROBLASTOMA, OLFACTORY
EXOSTOSES, MULTIPLE HEREDITARY
EYE NEOPLASMS
EYELID NEOPLASMS
FACIAL NEOPLASMS
FALLOPIAN TUBE NEOPLASMS
FEMORAL NEOPLASMS
FIBROADENOMA
FIBROMA
FIBROMA, DESMOPLASTIC
FIBROMA, OSSIFYING
FIBROMATOSIS, ABDOMINAL
FIBROMATOSIS, AGGRESSIVE
FIBROSARCOMA
FOLLICULAR CYST
GALLBLADDER NEOPLASMS
GANGLIOGLIOMA
GANGLION CYSTS
GANGLIONEUROBLASTOMA
GANGLIONEUROMA
GARDNER SYNDROME
GASTRINOMA
GASTROINTESTINAL NEOPLASMS
GASTROINTESTINAL STROMAL TUMORS
GENITAL NEOPLASMS, FEMALE
GENITAL NEOPLASMS, MALE
GERMINOMA
GESTATIONAL TROPHOBLASTIC DISEASE
GIANT CELL TUMOR OF BONE
GIANT CELL TUMORS
GINGIVAL NEOPLASMS
GLIOBLASTOMA
GLIOMA
GLIOMA, SUBEPENDYMAL
GLIOSARCOMA
GLOMUS JUGULARE TUMOR
GLOMUS TUMOR
GLOMUS TYMPANICUM TUMOR
GLUCAGONOMA
GONADOBLASTOMA
GRANULAR CELL TUMOR
GRANULOSA CELL TUMOR
GROWTH HORMONE-SECRETING PITUITARY ADENOMA
HAMARTOMA
HAMARTOMA SYNDROME, MULTIPLE
HEAD AND NECK NEOPLASMS
HEART NEOPLASMS
HEMANGIOBLASTOMA
HEMANGIOENDOTHELIOMA
HEMANGIOENDOTHELIOMA, EPITHELIOID
HEMANGIOMA
HEMANGIOMA, CAPILLARY
HEMANGIOMA, CAVERNOUS
HEMANGIOMA, CAVERNOUS, CENTRAL NERVOUS SYSTEM
HEMANGIOPERICYTOMA
HEMANGIOSARCOMA
HEMATOLOGIC NEOPLASMS
HEPATOBLASTOMA
HEREDITARY BREAST AND OVARIAN CANCER SYNDROME
HIDROCYSTOMA
HISTIOCYTIC DISORDERS, MALIGNANT
HISTIOCYTIC SARCOMA
HISTIOCYTOMA
HISTIOCYTOMA, BENIGN FIBROUS
HISTIOCYTOMA, MALIGNANT FIBROUS
HODGKIN DISEASE
HUTCHINSON'S MELANOTIC FRECKLE
HYDATIDIFORM MOLE
HYDATIDIFORM MOLE, INVASIVE
HYPOPHARYNGEAL NEOPLASMS
HYPOTHALAMIC NEOPLASMS
ILEAL NEOPLASMS
IMMUNOPROLIFERATIVE SMALL INTESTINAL DISEASE
INFLAMMATORY BREAST NEOPLASMS
INFRATENTORIAL NEOPLASMS
INSULINOMA
INTESTINAL NEOPLASMS
INTRAOCULAR LYMPHOMA
IRIS NEOPLASMS
JAW CYSTS
JAW NEOPLASMS
JEJUNAL NEOPLASMS
KASABACH-MERRITT SYNDROME
KERATOSIS, ACTINIC
KIDNEY NEOPLASMS
KLATSKIN TUMOR
KRUKENBERG TUMOR
LAMBERT-EATON MYASTHENIC SYNDROME
LANGERHANS CELL SARCOMA
LARYNGEAL NEOPLASMS
LEIOMYOMA
LEIOMYOMA, EPITHELIOID
LEIOMYOMATOSIS
LEIOMYOSARCOMA
LEUKEMIA
LEUKEMIA L1210
LEUKEMIA L5178
LEUKEMIA P388
LEUKEMIA, B-CELL
LEUKEMIA, BASOPHILIC, ACUTE
LEUKEMIA, BIPHENOTYPIC, ACUTE
LEUKEMIA, EOSINOPHILIC, ACUTE
LEUKEMIA, ERYTHROBLASTIC, ACUTE
LEUKEMIA, EXPERIMENTAL
LEUKEMIA, FELINE
LEUKEMIA, HAIRY CELL
LEUKEMIA, LARGE GRANULAR LYMPHOCYTIC
LEUKEMIA, LYMPHOCYTIC, CHRONIC, B-CELL
LEUKEMIA, LYMPHOID
LEUKEMIA, MAST-CELL
LEUKEMIA, MEGAKARYOBLASTIC, ACUTE
LEUKEMIA, MONOCYTIC, ACUTE
LEUKEMIA, MYELOGENOUS, CHRONIC, BCR-ABL POSITIVE
LEUKEMIA, MYELOID
LEUKEMIA, MYELOID, ACCELERATED PHASE
LEUKEMIA, MYELOID, ACUTE
LEUKEMIA, MYELOID, CHRONIC, ATYPICAL, BCR-ABL NEGATIVE
LEUKEMIA, MYELOID, CHRONIC-PHASE
LEUKEMIA, MYELOMONOCYTIC, ACUTE
LEUKEMIA, MYELOMONOCYTIC, CHRONIC
LEUKEMIA, MYELOMONOCYTIC, JUVENILE
LEUKEMIA, PLASMA CELL
LEUKEMIA, PROLYMPHOCYTIC
LEUKEMIA, PROLYMPHOCYTIC, B-CELL
LEUKEMIA, PROLYMPHOCYTIC, T-CELL
LEUKEMIA, PROMYELOCYTIC, ACUTE
LEUKEMIA, RADIATION-INDUCED
LEUKEMIA, T-CELL
LEUKEMIA-LYMPHOMA, ADULT T-CELL
LEUKEMIC INFILTRATION
LEUKOPLAKIA
LEUKOPLAKIA, HAIRY
LEUKOPLAKIA, ORAL
LEYDIG CELL TUMOR
LI-FRAUMENI SYNDROME
LIMBIC ENCEPHALITIS
LINITIS PLASTICA
LIP NEOPLASMS
LIPOBLASTOMA
LIPOMA
LIPOSARCOMA
LIPOSARCOMA, MYXOID
LIVER NEOPLASMS
LIVER NEOPLASMS, EXPERIMENTAL
LUNG NEOPLASMS
LUTEOMA
LYMPHANGIOLEIOMYOMATOSIS
LYMPHANGIOMA
LYMPHANGIOMA, CYSTIC
LYMPHANGIOMYOMA
LYMPHANGIOSARCOMA
LYMPHATIC METASTASIS
LYMPHATIC VESSEL TUMORS
LYMPHOCELE
LYMPHOMA
LYMPHOMA, AIDS-RELATED
LYMPHOMA, B-CELL
LYMPHOMA, B-CELL, MARGINAL ZONE
LYMPHOMA, EXTRANODAL NK-T-CELL
LYMPHOMA, FOLLICULAR
LYMPHOMA, LARGE B-CELL, DIFFUSE
LYMPHOMA, LARGE-CELL, ANAPLASTIC
LYMPHOMA, LARGE-CELL, IMMUNOBLASTIC
LYMPHOMA, MANTLE-CELL
LYMPHOMA, NON-HODGKIN
LYMPHOMA, PRIMARY CUTANEOUS ANAPLASTIC LARGE CELL
LYMPHOMA, PRIMARY EFFUSION
LYMPHOMA, T-CELL
LYMPHOMA, T-CELL, CUTANEOUS
LYMPHOMA, T-CELL, PERIPHERAL
LYMPHOMATOID GRANULOMATOSIS
LYMPHOMATOID PAPULOSIS
LYNCH SYNDROME II
MALIGNANT CARCINOID SYNDROME
MAMMARY ANALOGUE SECRETORY CARCINOMA
MAMMARY NEOPLASMS, ANIMAL
MAMMARY NEOPLASMS, EXPERIMENTAL
MANDIBULAR NEOPLASMS
MAST-CELL SARCOMA
MASTOCYTOMA
MASTOCYTOMA, SKIN
MASTOCYTOSIS
MASTOCYTOSIS, CUTANEOUS
MASTOCYTOSIS, SYSTEMIC
MAXILLARY NEOPLASMS
MAXILLARY SINUS NEOPLASMS
MEDIASTINAL CYST
MEDIASTINAL NEOPLASMS
MEDULLOBLASTOMA
MEIGS SYNDROME
MELANOMA
MELANOMA, AMELANOTIC
MELANOMA, EXPERIMENTAL
MENINGEAL CARCINOMATOSIS
MENINGEAL NEOPLASMS
MENINGIOMA
MESENCHYMOMA
MESENTERIC CYST
MESONEPHROMA
MESOTHELIOMA
MESOTHELIOMA, CYSTIC
MIXED TUMOR, MALIGNANT
MIXED TUMOR, MESODERMAL
MIXED TUMOR, MULLERIAN
MONGOLIAN SPOT
MOUTH NEOPLASMS
MUCOCELE
MUCOEPIDERMOID TUMOR
MUIR-TORRE SYNDROME
MULTIPLE ENDOCRINE NEOPLASIA
MULTIPLE ENDOCRINE NEOPLASIA TYPE 1
MULTIPLE ENDOCRINE NEOPLASIA TYPE 2A
MULTIPLE ENDOCRINE NEOPLASIA TYPE 2B
MULTIPLE MYELOMA
MULTIPLE PULMONARY NODULES
MUSCLE NEOPLASMS
MYCOSIS FUNGOIDES
MYELITIS, TRANSVERSE
MYELOLIPOMA
MYOEPITHELIOMA
MYOFIBROMA
MYOFIBROMATOSIS
MYOMA
MYOSARCOMA
MYXOMA
MYXOSARCOMA
NASOPHARYNGEAL NEOPLASMS
NELSON SYNDROME
NEOPLASM INVASIVENESS
NEOPLASM METASTASIS
NEOPLASM MICROMETASTASIS
NEOPLASM RECURRENCE, LOCAL
NEOPLASM REGRESSION, SPONTANEOUS
NEOPLASM SEEDING
NEOPLASM, RESIDUAL
NEOPLASMS
NEOPLASMS BY HISTOLOGIC TYPE
NEOPLASMS BY SITE
NEOPLASMS, ADIPOSE TISSUE
NEOPLASMS, ADNEXAL AND SKIN APPENDAGE
NEOPLASMS, BASAL CELL
NEOPLASMS, BONE TISSUE
NEOPLASMS, COMPLEX AND MIXED
NEOPLASMS, CONNECTIVE AND SOFT TISSUE
NEOPLASMS, CONNECTIVE TISSUE
NEOPLASMS, CYSTIC, MUCINOUS, AND SEROUS
NEOPLASMS, DUCTAL, LOBULAR, AND MEDULLARY
NEOPLASMS, EXPERIMENTAL
NEOPLASMS, FIBROEPITHELIAL
NEOPLASMS, FIBROUS TISSUE
NEOPLASMS, GERM CELL AND EMBRYONAL
NEOPLASMS, GLANDULAR AND EPITHELIAL
NEOPLASMS, GONADAL TISSUE
NEOPLASMS, HORMONE-DEPENDENT
NEOPLASMS, MESOTHELIAL
NEOPLASMS, MULTIPLE PRIMARY
NEOPLASMS, MUSCLE TISSUE
NEOPLASMS, NERVE TISSUE
NEOPLASMS, NEUROEPITHELIAL
NEOPLASMS, PLASMA CELL
NEOPLASMS, POST-TRAUMATIC
NEOPLASMS, RADIATION-INDUCED
NEOPLASMS, SECOND PRIMARY
NEOPLASMS, SQUAMOUS CELL
NEOPLASMS, UNKNOWN PRIMARY
NEOPLASMS, VASCULAR TISSUE
NEOPLASTIC CELLS, CIRCULATING
NEOPLASTIC PROCESSES
NEOPLASTIC SYNDROMES, HEREDITARY
NEPHROMA, MESOBLASTIC
NERVE SHEATH NEOPLASMS
NERVOUS SYSTEM NEOPLASMS
NEURILEMMOMA
NEUROBLASTOMA
NEUROCYTOMA
NEUROECTODERMAL TUMOR, MELANOTIC
NEUROECTODERMAL TUMORS
NEUROECTODERMAL TUMORS, PRIMITIVE
NEUROECTODERMAL TUMORS, PRIMITIVE, PERIPHERAL
NEUROENDOCRINE TUMORS
NEUROFIBROMA
NEUROFIBROMA, PLEXIFORM
NEUROFIBROMATOSES
NEUROFIBROMATOSIS 1
NEUROFIBROMATOSIS 2
NEUROFIBROSARCOMA
NEUROMA
NEUROMA, ACOUSTIC
NEUROTHEKEOMA
NEVI AND MELANOMAS
NEVUS
NEVUS OF OTA
NEVUS, BLUE
NEVUS, EPITHELIOID AND SPINDLE CELL
NEVUS, HALO
NEVUS, INTRADERMAL
NEVUS, PIGMENTED
NEVUS, SEBACEOUS OF JADASSOHN
NEVUS, SPINDLE CELL
NONODONTOGENIC CYSTS
NOSE NEOPLASMS
ODONTOGENIC CYST, CALCIFYING
ODONTOGENIC CYSTS
ODONTOGENIC TUMOR, SQUAMOUS
ODONTOGENIC TUMORS
ODONTOMA
OLIGODENDROGLIOMA
OPSOCLONUS-MYOCLONUS SYNDROME
OPTIC NERVE GLIOMA
OPTIC NERVE NEOPLASMS
ORBITAL NEOPLASMS
OROPHARYNGEAL NEOPLASMS
OSTEOBLASTOMA
OSTEOCHONDROMA
OSTEOCHONDROMATOSIS
OSTEOMA
OSTEOMA, OSTEOID
OSTEOSARCOMA
OSTEOSARCOMA, JUXTACORTICAL
OTORHINOLARYNGOLOGIC NEOPLASMS
OVARIAN CYSTS
OVARIAN NEOPLASMS
PAGET DISEASE, EXTRAMAMMARY
PAGET'S DISEASE, MAMMARY
PAGETOID RETICULOSIS
PALATAL NEOPLASMS
PALLISTER-HALL SYNDROME
PANCOAST SYNDROME
PANCREATIC CYST
PANCREATIC NEOPLASMS
PANCREATIC PSEUDOCYST
PAPILLOMA
PAPILLOMA, CHOROID PLEXUS
PAPILLOMA, INTRADUCTAL
PAPILLOMA, INVERTED
PARAGANGLIOMA
PARAGANGLIOMA, EXTRA-ADRENAL
PARANASAL SINUS NEOPLASMS
PARANEOPLASTIC CEREBELLAR DEGENERATION
PARANEOPLASTIC ENDOCRINE SYNDROMES
PARANEOPLASTIC POLYNEUROPATHY
PARANEOPLASTIC SYNDROMES
PARANEOPLASTIC SYNDROMES, NERVOUS SYSTEM
PARANEOPLASTIC SYNDROMES, OCULAR
PARATHYROID NEOPLASMS
PAROTID NEOPLASMS
PAROVARIAN CYST
PELVIC NEOPLASMS
PENILE NEOPLASMS
PERIODONTAL CYST
PERIPHERAL NERVOUS SYSTEM NEOPLASMS
PERITONEAL NEOPLASMS
PERIVASCULAR EPITHELIOID CELL NEOPLASMS
PEUTZ-JEGHERS SYNDROME
PHARYNGEAL NEOPLASMS
PHEOCHROMOCYTOMA
PHYLLODES TUMOR
PILOMATRIXOMA
PILONIDAL SINUS
PINEALOMA
PITUITARY NEOPLASMS
PLASMABLASTIC LYMPHOMA
PLASMACYTOMA
PLEURAL EFFUSION, MALIGNANT
PLEURAL NEOPLASMS
POLYCYSTIC OVARY SYNDROME
POPLITEAL CYST
POROMA
PRECANCEROUS CONDITIONS
PRECURSOR B-CELL LYMPHOBLASTIC LEUKEMIA-LYMPHOMA
PRECURSOR CELL LYMPHOBLASTIC LEUKEMIA-LYMPHOMA
PRECURSOR T-CELL LYMPHOBLASTIC LEUKEMIA-LYMPHOMA
PREGNANCY COMPLICATIONS, NEOPLASTIC
PRELEUKEMIA
PROLACTINOMA
PROSTATIC INTRAEPITHELIAL NEOPLASIA
PROSTATIC NEOPLASMS
PROSTATIC NEOPLASMS, CASTRATION-RESISTANT
PROTEUS SYNDROME
PSEUDOMYXOMA PERITONEI
PULMONARY ADENOMATOSIS, OVINE
PULMONARY BLASTOMA
PULMONARY SCLEROSING HEMANGIOMA
RADICULAR CYST
RANULA
RECTAL NEOPLASMS
RESPIRATORY TRACT NEOPLASMS
RETINAL NEOPLASMS
RETINOBLASTOMA
RETROPERITONEAL NEOPLASMS
RHABDOID TUMOR
RHABDOMYOMA
RHABDOMYOSARCOMA
RHABDOMYOSARCOMA, ALVEOLAR
RHABDOMYOSARCOMA, EMBRYONAL
SALIVARY GLAND NEOPLASMS
SARCOMA
SARCOMA 180
SARCOMA 37
SARCOMA, ALVEOLAR SOFT PART
SARCOMA, AVIAN
SARCOMA, CLEAR CELL
SARCOMA, ENDOMETRIAL STROMAL
SARCOMA, EWING
SARCOMA, EXPERIMENTAL
SARCOMA, KAPOSI
SARCOMA, MYELOID
SARCOMA, SMALL CELL
SARCOMA, SYNOVIAL
SARCOMA, YOSHIDA
SEBACEOUS GLAND NEOPLASMS
SEMINOMA
SERTOLI CELL TUMOR
SERTOLI-LEYDIG CELL TUMOR
SEX CORD-GONADAL STROMAL TUMORS
SEZARY SYNDROME
SIGMOID NEOPLASMS
SISTER MARY JOSEPH'S NODULE
SKIN NEOPLASMS
SKULL BASE NEOPLASMS
SKULL NEOPLASMS
SMALL CELL LUNG CARCINOMA
SMOOTH MUSCLE TUMOR
SOFT TISSUE NEOPLASMS
SOLITARY FIBROUS TUMOR, PLEURAL
SOLITARY FIBROUS TUMORS
SOMATOSTATINOMA
SPINAL CORD NEOPLASMS
SPINAL NEOPLASMS
SPLENIC NEOPLASMS
SQUAMOUS INTRAEPITHELIAL LESIONS OF THE CERVIX
STOMACH NEOPLASMS
STRUMA OVARII
STURGE-WEBER SYNDROME
SUBLINGUAL GLAND NEOPLASMS
SUBMANDIBULAR GLAND NEOPLASMS
SUPRATENTORIAL NEOPLASMS
SWEAT GLAND NEOPLASMS
SYNOVIAL CYST
SYRINGOMA
TARLOV CYSTS
TERATOCARCINOMA
TERATOMA
TESTICULAR NEOPLASMS
THECOMA
THORACIC NEOPLASMS
THYMOMA
THYMUS NEOPLASMS
THYROGLOSSAL CYST
THYROID CARCINOMA, ANAPLASTIC
THYROID NEOPLASMS
THYROID NODULE
TONGUE NEOPLASMS
TONSILLAR NEOPLASMS
TRACHEAL NEOPLASMS
TRIPLE NEGATIVE BREAST NEOPLASMS
TROPHOBLASTIC NEOPLASMS
TROPHOBLASTIC TUMOR, PLACENTAL SITE
TUBEROUS SCLEROSIS
UNILATERAL BREAST NEOPLASMS
URACHAL CYST
URETERAL NEOPLASMS
URETHRAL NEOPLASMS
URINARY BLADDER NEOPLASMS
UROGENITAL NEOPLASMS
UROLOGIC NEOPLASMS
URTICARIA PIGMENTOSA
UTERINE CERVICAL DYSPLASIA
UTERINE CERVICAL NEOPLASMS
UTERINE NEOPLASMS
UVEAL NEOPLASMS
VAGINAL NEOPLASMS
VASCULAR NEOPLASMS
VENEREAL TUMORS, VETERINARY
VIPOMA
VULVAR NEOPLASMS
WAGR SYNDROME
WALDENSTROM MACROGLOBULINEMIA
WILMS TUMOR
XERODERMA PIGMENTOSUM
ZOLLINGER-ELLISON SYNDROME

## Sheet: Table S5
Table S5. Breast Cancer Drug Panel Summary
Gene	Trial ID	Trial Description	Conditions	Drug Intervention	Number of DrugBank Entries	Number of Locations
BRCA1	NCT01525589	A Phase II Clinical Trial of PM01183 in BRCA 1/2-Associated or Unselected Metastatic Breast Cancer	Breast Cancer	PM01183	8	5
BRCA1	NCT01670500	Cisplatin vs. Doxorubicin/Cyclophosphamide in BrCa	Breast Cancer	Cisplatin	8	12
				Cyclophosphamide
				Doxorubicin
BRCA1	NCT01905046	Metformin Hydrochloride in Patients With Atypical Hyperplasia or In Situ Breast Cancer to Placebo in Decreasing Atypical Cells in Patients With Atypical Hyperplasia or in Situ Breast Cancer	Atypical Ductal Breast Hyperplasia	metformin hydrochloride	8	16
			BRCA1 Mutation Carrier
			BRCA2 Mutation Carrier
			Ductal Breast Carcinoma in Situ
			Lobular Breast Carcinoma in Situ
BRCA1	NCT01905592	A Phase III Trial of Niraparib Versus Physician's Choice in HER2 Negative, Germline BRCA Mutation-positive Breast Cancer Patients	BRCA1 Gene Mutation	niraparib	8	27
			BRCA2 Gene Mutation	Physician's choice
			Carcinoma of Breast
			Human Epidermal Growth Factor 2 Negative Carcinoma of Breast
BRCA1	NCT01945775	A Study Evaluating Talazoparib (BMN 673), a PARP Inhibitor, in Advanced and/or Metastatic Breast Cancer Patients With BRCA Mutation (EMBRACA Study)	BRCA 1 Gene Mutation	talazoparib	8	58
			BRCA 2 Gene Mutation	Physician's-Choice
			Breast Neoplasms
BRCA1	NCT01989546	Pilot Trial of BMN 673, an Oral PARP Inhibitor, in Patients With Advanced Solid Tumors and Deleterious BRCA Mutations	Advanced Breast Cancer	BMN 673	8	1
			Advanced Ovarian Cancer
			Advanced Solid Tumors
			Primary Peritoneal Cancer
BRCA1	NCT01990352	Correlate BRCA1 Protein Expression With Response to DNA Damaging Chemotherapy	Breast Cancer	Pegylated liposomal doxorubicin	8	1
BRCA1	NCT02032823	Olaparib as Adjuvant Treatment in Patients With Germline BRCA Mutated High Risk HER2 Negative Primary Breast Cancer	Breast Cancer	Olaparib	8	294
				Placebo
BRCA1	NCT02163694	A Phase 3 Randomized, Placebo-controlled Trial of Carboplatin and Paclitaxel With or Without Veliparib (ABT-888) in HER2-negative Metastatic or Locally Advanced Unresectable BRCA-associated Breast Cancer	Metastatic Breast Cancer	Veliparib	8	52
				Carboplatin
				Paclitaxel
BRCA1	NCT02203513	A Phase II Single Arm Pilot Study of the Chk1/2 Inhibitor (LY2606368) in BRCA1/2 Mutation Associated Breast or Ovarian Cancer, Triple Negative Breast Cancer, High Grade Serous Ovarian Cancer, and Metastatic Castrate-Resistant Prostate Cancer	Breast Cancer	LY2606368	8	1
			Ovarian Cancer
			mCRPC
BRCA1	NCT02282020	Olaparib Treatment in Relapsed Germline Breast Cancer Susceptibility Gene (BRCA) Mutated Ovarian Cancer Patients Who Have Progressed at Least 6 Months After Last Platinum Treatment and Have Received at Least 2 Prior Platinum Treatments	Relapsed Ovarian Cancer, BRCA Mutation, Platinum Sensitivity	OLAPARIB	8	28
				Single agent chemotherapy
BRCA1	NCT02314156	Transdermal or Oral Telapristone Acetate in Treating Patients Undergoing Mastectomy	BRCA1 Mutation Carrier	Telapristone Acetate	8	2
			BRCA2 Mutation Carrier	Telapristone Acetate
			Ductal Breast Carcinoma In Situ
			Lobular Breast Carcinoma In Situ
			Stage 0 Breast Cancer
			Stage IA Breast Cancer
			Stage IB Breast Cancer
			Stage IIA Breast Cancer
			Stage IIB Breast Cancer
BRCA1	NCT02393794	Romidepsin Plus Cisplatin in Locally Recurrent or Metastatic Triple Negative Breast Cancer (TNBC)	Breast Cancer	Romidepsin	8	1
			Triple-Negative Breast Cancer	Cisplatin
BRCA1	NCT02401347	Talazoparib Beyond BRCA (TBB) Trial	Advanced Breast Cancer	Talazoparib Tosylate	8	1
			HER2/Neu Negative
			Triple-Negative Breast Cancer
BRCA1	NCT02482311	Safety, Tolerance, PK, and Anti-tumour Activity of AZD1775 Monotherapy in Patients With Advanced Solid Tumours	Ovarian Cancer, TNBC, SCLC, Other Solid Tumours	AZD 1775	8	6
BRCA1	NCT02561832	A Phase I, Open-Label, 2 Part Multicentre Study to Assess the Safety, Tolerability and Efficacy of Olaparib in Combination With Carboplatin in Patients With HER-2 Negative Breast Cancer	Breast Cancer	Olaparib	8	3
				Carboplatin
				Anthracycline
				Cyclophosphamide
BRCA2	NCT01670500	Cisplatin vs. Doxorubicin/Cyclophosphamide in BrCa	Breast Cancer	Cisplatin	2	12
				Cyclophosphamide
				Doxorubicin
BRCA2	NCT01905046	Metformin Hydrochloride in Patients With Atypical Hyperplasia or In Situ Breast Cancer to Placebo in Decreasing Atypical Cells in Patients With Atypical Hyperplasia or in Situ Breast Cancer	Atypical Ductal Breast Hyperplasia	metformin hydrochloride	2	16
			BRCA1 Mutation Carrier
			BRCA2 Mutation Carrier
			Ductal Breast Carcinoma in Situ
			Lobular Breast Carcinoma in Situ
BRCA2	NCT01905592	A Phase III Trial of Niraparib Versus Physician's Choice in HER2 Negative, Germline BRCA Mutation-positive Breast Cancer Patients	BRCA1 Gene Mutation	niraparib	2	27
			BRCA2 Gene Mutation	Physician's choice
			Carcinoma of Breast
			Human Epidermal Growth Factor 2 Negative Carcinoma of Breast
BRCA2	NCT01945775	A Study Evaluating Talazoparib (BMN 673), a PARP Inhibitor, in Advanced and/or Metastatic Breast Cancer Patients With BRCA Mutation (EMBRACA Study)	BRCA 1 Gene Mutation	talazoparib	2	58
			BRCA 2 Gene Mutation	Physician's-Choice
			Breast Neoplasms
BRCA2	NCT02163694	A Phase 3 Randomized, Placebo-controlled Trial of Carboplatin and Paclitaxel With or Without Veliparib (ABT-888) in HER2-negative Metastatic or Locally Advanced Unresectable BRCA-associated Breast Cancer	Metastatic Breast Cancer	Veliparib	2	52
				Carboplatin
				Paclitaxel
BRCA2	NCT02314156	Transdermal or Oral Telapristone Acetate in Treating Patients Undergoing Mastectomy	BRCA1 Mutation Carrier	Telapristone Acetate	2	2
			BRCA2 Mutation Carrier	Telapristone Acetate
			Ductal Breast Carcinoma In Situ
			Lobular Breast Carcinoma In Situ
			Stage 0 Breast Cancer
			Stage IA Breast Cancer
			Stage IB Breast Cancer
			Stage IIA Breast Cancer
			Stage IIB Breast Cancer
BRCA2	NCT02393794	Romidepsin Plus Cisplatin in Locally Recurrent or Metastatic Triple Negative Breast Cancer (TNBC)	Breast Cancer	Romidepsin	2	1
			Triple-Negative Breast Cancer	Cisplatin
BRCA2	NCT02401347	Talazoparib Beyond BRCA (TBB) Trial	Advanced Breast Cancer	Talazoparib Tosylate	2	1
			HER2/Neu Negative
			Triple-Negative Breast Cancer
PTEN	NCT01226316	Safety, Tolerability & Potential Anti-cancer Activity of Increasing Doses of AZD5363 in Different Treatment Schedules	AKT1	AZD5363	11	10
			Advanced Solid Malignancy	AZD5363
			Advanced or Metastatic Breast Cancer	AZD5363
			Cervical Cancer	AZD5363
			ER+
			Endometrial Cancer
			HER2+
			Ovarian Cancer
			PIK3CA
			PTEN
			Pharmacodynamics
			Pharmacokinetics
			Safety and Tolerability
			Tumour Response
PTEN	NCT01633060	A Phase III Study of BKM120 With Fulvestrant in Patients With HR+,HER2-, AI Treated, Locally Advanced or Metastatic Breast Cancer Who Progressed on or After mTORi	Metastatic Breast Cancer HR+, HER2-	Fulvestrant	11	2
				BKM120
				BKM120 matching placebo
PTEN	NCT01884285	AZD8186 First Time In Patient Ascending Dose Study	Advanced Castrate-resistant Prostate Cancer (CRPC);	AZD8186 monotherapy	11	4
			Squamous Non-Small Cell Lung Cancer (sqNSCLC);	Part B: AZD8186 monotherapy
			Triple Negative Breast Cancer (TNBC)	Part C: Abiraterone acetate in combination with AZD8186
				Part D1: AZD2014 combination with AZD8186
				Part D2 AZD2014 combination with AZD8186
PTEN	NCT01989546	Pilot Trial of BMN 673, an Oral PARP Inhibitor, in Patients With Advanced Solid Tumors and Deleterious BRCA Mutations	Advanced Breast Cancer	BMN 673	11	1
			Advanced Ovarian Cancer
			Advanced Solid Tumors
			Primary Peritoneal Cancer
PTEN	NCT02401347	Talazoparib Beyond BRCA (TBB) Trial	Advanced Breast Cancer	Talazoparib Tosylate	11	1
			HER2/Neu Negative
			Triple-Negative Breast Cancer
CDH1	NCT02659631	PF-06671008 Dose Escalation Study in Advanced Solid Tumors	Neoplasms	PF-06671008	34	4
				PF-06671008
PALB2	NCT02401347	Talazoparib Beyond BRCA (TBB) Trial	Advanced Breast Cancer	Talazoparib Tosylate	1	1
			HER2/Neu Negative
			Triple-Negative Breast Cancer
CHEK2	NCT02401347	Talazoparib Beyond BRCA (TBB) Trial	Advanced Breast Cancer	Talazoparib Tosylate	1	1
			HER2/Neu Negative
			Triple-Negative Breast Cancer
ATM	NCT01989546	Pilot Trial of BMN 673, an Oral PARP Inhibitor, in Patients With Advanced Solid Tumors and Deleterious BRCA Mutations	Advanced Breast Cancer	BMN 673	3	1
			Advanced Ovarian Cancer
			Advanced Solid Tumors
			Primary Peritoneal Cancer
ATM	NCT02401347	Talazoparib Beyond BRCA (TBB) Trial	Advanced Breast Cancer	Talazoparib Tosylate	3	1
			HER2/Neu Negative
			Triple-Negative Breast Cancer
NBN	NCT02401347	Talazoparib Beyond BRCA (TBB) Trial	Advanced Breast Cancer	Talazoparib Tosylate	6	1
			HER2/Neu Negative
			Triple-Negative Breast Cancer
BARD1	NCT02401347	Talazoparib Beyond BRCA (TBB) Trial	Advanced Breast Cancer	Talazoparib Tosylate	5	1
			HER2/Neu Negative
			Triple-Negative Breast Cancer
BRIP1	NCT02401347	Talazoparib Beyond BRCA (TBB) Trial	Advanced Breast Cancer	Talazoparib Tosylate	1	1
			HER2/Neu Negative
			Triple-Negative Breast Cancer

## Sheet: Table S6
Table S6. Breast Cancer Drug Panel Report
Gene	Trial ID	Trial Description	Phase	Conditions	Drug Intervention	DrugBank ID	Target	Name	Prices	SNP effects	SNP adverse	Locations
BRCA1	NCT01525589	A Phase II Clinical Trial of PM01183 in BRCA 1/2-Associated or Unselected Metastatic Breast Cancer	Phase 2	Breast Cancer	PM01183	DB00242	POLE,POLE2	CLADRIBINE	CLADRIBINE 10 MG/10 ML VIAL USD 34.2;LEUSTATIN 10 MG/10 ML VIAL USD 102.78	-	-	8,Stanford,California,United States,
				-	-	DB03496	CDK2,CDK9,CDK7	FLAVOPIRIDOL	-	-	-	2,Boston,Massachusetts,02114,United States,
				-	-	DB05037	CDK2	AT7519	-	-	-	11,New York,New York,United States,
				-	-	DB05149	CHEK1,CHEK2	XL844	-	-	-	7,Philadelphia,Pennsylvania,United States,
				-	-	DB05169	AURKA	AT9283	-	-	-	10,Houston,Texas,United States,
				-	-	DB05198	AURKA	CYC116	-	-	-	-
				-	-	DB05220	AURKA	MLN8237	-	-	-	-
				-	-	DB06616	CDK2	BOSUTINIB	-	-	-	-
BRCA1	NCT01670500	Cisplatin vs. Doxorubicin/Cyclophosphamide in BrCa	Phase 2	Breast Cancer	CYCLOPHOSPHAMIDE	DB00242	POLE,POLE2	CLADRIBINE	CLADRIBINE 10 MG/10 ML VIAL USD 34.2;LEUSTATIN 10 MG/10 ML VIAL USD 102.78	-	-	University of Colorado Cancer Center,Virginia Borges, MD,Aurora,Colorado,80045,United States,virginia.borges@ucdenver.edu,303-724-0186,
				-	CISPLATIN	DB03496	CDK2,CDK9,CDK7	FLAVOPIRIDOL	-	-	-	Yale School of Medicine,Erin Hofstatter, MD,New Haven,Connecticut,06520,United States,erin.hofstatter@yale.edu,203-737-1600,
				-	DOXORUBICIN	DB05037	CDK2	AT7519	-	-	-	Georgetown University Medical Center,Claudine Isaacs, MD,Washington D.C.,District of Columbia,20007,United States,isaacsc@georgetown.edu,
				-	-	DB05149	CHEK1,CHEK2	XL844	-	-	-	Johns Hopkins,Antonio Wolff, MD,Baltimore,Maryland,21287,United States,awolff@jhmi.edu,
				-	-	DB05169	AURKA	AT9283	-	-	-	Massachusetts General Hospital,Steven Isakoff, MD, PhD,Boston,Massachusetts,02114,United States,sisakoff@partners.org,617-726-4920,
				-	-	DB05198	AURKA	CYC116	-	-	-	Beth Israel Deaconess Medical Center,Nadine Tung, MD,Boston,Massachusetts,02215,United States,ntung@bidmc.harvard.edu,617-667-7081,
				-	-	DB05220	AURKA	MLN8237	-	-	-	Dana-Farber Cancer Institute,Judy Garber, MD, MPH,Boston,Massachusetts,02215,United States,jegarber@partners.org,617-632-2282,
				-	-	DB06616	CDK2	BOSUTINIB	-	-	-	New Hampshire Oncology-Hematology,Douglas Weckstein, MD,Hooksett,New Hampshire,03106,United States,d.weckstein@nhoh.com,603-622-6484,
				-	-	-	-	-	-	-	-	Rutgers Cancer Institute of New Jersey,Deborah Toppmeyer, MD,New Brunswick,New Jersey,08901,United States,toppmede@umdnj.edu,732-235-6789,
				-	-	-	-	-	-	-	-	University of Pennsylvania Abramson Cancer Center,Susan Domchek, MD,Philadelphia,Pennsylvania,19104,United States,susan.domchek@uphs.upenn.edu,215-615-3360,
				-	-	-	-	-	-	-	-	Women and Infants Hospital,Robert Legare, MD,Providence,Rhode Island,02905,United States,rlegare@wihri.org,401-453-7540,
				-	-	-	-	-	-	-	-	MD Anderson Cancer Center,Banu Arun, MD,Houston,Texas,77030,United States,barun@mdanderson.org,713-792-2817,
BRCA1	NCT01905046	Metformin Hydrochloride in Patients With Atypical Hyperplasia or In Situ Breast Cancer to Placebo in Decreasing Atypical Cells in Patients With Atypical Hyperplasia or in Situ Breast Cancer	Phase 3	Atypical Ductal Breast Hyperplasia	METFORMIN HYDROCHLORIDE	DB00242	POLE,POLE2	CLADRIBINE	CLADRIBINE 10 MG/10 ML VIAL USD 34.2;LEUSTATIN 10 MG/10 ML VIAL USD 102.78	-	-	City of Hope Comprehensive Cancer Center,Victoria Seewaldt, MD,Duarte,California,91010,United States,626-471-7321,
				BRCA1 Mutation Carrier	-	DB03496	CDK2,CDK9,CDK7	FLAVOPIRIDOL	-	-	-	Mayo Clinic,Sandhya Pruthi, MD,Rochester,Minnesota,55905,United States,507-538-0289,
				BRCA2 Mutation Carrier	-	DB05037	CDK2	AT7519	-	-	-	Roswell Park Cancer Institute,Jessica Young, MD,Buffalo,New York,14263,United States,716-845-2918,
				Ductal Breast Carcinoma in Situ	-	DB05149	CHEK1,CHEK2	XL844	-	-	-	Columbia University-Herbert Irving Cancer Center,Katherine Crew, MD,New York,New York,10032,United States,212-305-1732,
				Lobular Breast Carcinoma in Situ	-	DB05169	AURKA	AT9283	-	-	-	The Christ Hospital,Jennifer Manders, MD,Cincinnati,Ohio,45219,United States,513-585-1496,
				-	-	DB05198	AURKA	CYC116	-	-	-	Ohio State University Comprehensive Cancer Center,Lisa Yee, MD,Columbus,Ohio,43210,United States,614-293-6654,
				-	-	DB05220	AURKA	MLN8237	-	-	-	Greenville Health System Cancer Institute-Easley,Jeffrey Giguere, MD,Easley,South Carolina,29640,United States,864-241-6251,
				-	-	DB06616	CDK2	BOSUTINIB	-	-	-	Greenville Health System Cancer Institute-Faris,Jeffrey Giguere, MD,Greenville,South Carolina,29605,United States,864-241-6251,
				-	-	-	-	-	-	-	-	Greenville Memorial Hospital,Jeffrey Giguere, MD,Greenville,South Carolina,29605,United States,864-241-6251,
				-	-	-	-	-	-	-	-	Greenville Health System Cancer Institute-Eastside,Jeffrey Giguere, MD,Greenville,South Carolina,29615,United States,864-241-6251,
				-	-	-	-	-	-	-	-	Greenville Health System Cancer Institute-Greer,Jeffrey Giguere, MD,Greer,South Carolina,29650,United States,864-241-6251,
				-	-	-	-	-	-	-	-	Greenville Health System Cancer Institute-Seneca,Jeffrey Giguere, MD,Seneca,South Carolina,29672,United States,864-241-6251,
				-	-	-	-	-	-	-	-	Greenville Health System Cancer Institute-Spartanburg,Jeffrey Giguere, MD,Spartanburg,South Carolina,29307,United States,864-241-6251,
				-	-	-	-	-	-	-	-	M D Anderson Cancer Center,Therese Bevers, MD,Houston,Texas,77030,United States,713-745-8048,
				-	-	-	-	-	-	-	-	Doctor's Hospital of Laredo,Gary Unzeitig, MD,Laredo,Texas,78045,United States,956-726-3691,
				-	-	-	-	-	-	-	-	University of Wisconsin Hospital and Clinics,Lee Wilke, MD,Madison,Wisconsin,53792,United States,608-265-5852,
BRCA1	NCT01905592	A Phase III Trial of Niraparib Versus Physician's Choice in HER2 Negative, Germline BRCA Mutation-positive Breast Cancer Patients	Phase 3	BRCA1 Gene Mutation	NIRAPARIB	DB00242	POLE,POLE2	CLADRIBINE	CLADRIBINE 10 MG/10 ML VIAL USD 34.2;LEUSTATIN 10 MG/10 ML VIAL USD 102.78	-	-	Tuscon,Arizona,United States,
				BRCA2 Gene Mutation	-	DB03496	CDK2,CDK9,CDK7	FLAVOPIRIDOL	-	-	-	Los Angeles,California,United States,
				Carcinoma of Breast	-	DB05037	CDK2	AT7519	-	-	-	San Jose,California,United States,
				Human Epidermal Growth Factor 2 Negative Carcinoma of Breast	-	DB05149	CHEK1,CHEK2	XL844	-	-	-	Fort Myers,Florida,United States,
				-	-	DB05169	AURKA	AT9283	-	-	-	Miami,Florida,United States,
				-	-	DB05198	AURKA	CYC116	-	-	-	Iowa City,Iowa,United States,
				-	-	DB05220	AURKA	MLN8237	-	-	-	Boston,Massachusetts,United States,
				-	-	DB06616	CDK2	BOSUTINIB	-	-	-	Minneapolis,Minnesota,United States,
				-	-	-	-	-	-	-	-	Omaha,Nebraska,United States,
				-	-	-	-	-	-	-	-	Henderson,Nevada,United States,
				-	-	-	-	-	-	-	-	Morristown,New Jersey,United States,
				-	-	-	-	-	-	-	-	Lake Success,New York,United States,
				-	-	-	-	-	-	-	-	Latham,New York,United States,
				-	-	-	-	-	-	-	-	Eugene,Oregon,United States,
				-	-	-	-	-	-	-	-	Portland,Oregon,United States,
				-	-	-	-	-	-	-	-	Philadelphia,Pennsylvania,United States,
				-	-	-	-	-	-	-	-	Sioux Falls,South Dakota,United States,
				-	-	-	-	-	-	-	-	Nashville,Tennessee,United States,
				-	-	-	-	-	-	-	-	Dallas,Texas,United States,
				-	-	-	-	-	-	-	-	Fort Worth,Texas,76104,United States,
				-	-	-	-	-	-	-	-	Plano,Texas,75075,United States,
				-	-	-	-	-	-	-	-	San Antonio,Texas,United States,
				-	-	-	-	-	-	-	-	Webster,Texas,United States,
				-	-	-	-	-	-	-	-	Low Moor,Virginia,United States,
				-	-	-	-	-	-	-	-	Everett,Washington,United States,
				-	-	-	-	-	-	-	-	Seattle,Washington,United States,
				-	-	-	-	-	-	-	-	Milwaukee,Wisconsin,United States,
BRCA1	NCT01945775	A Study Evaluating Talazoparib (BMN 673), a PARP Inhibitor, in Advanced and/or Metastatic Breast Cancer Patients With BRCA Mutation (EMBRACA Study)	Phase 3	BRCA 1 Gene Mutation	TALAZOPARIB	DB00242	POLE,POLE2	CLADRIBINE	CLADRIBINE 10 MG/10 ML VIAL USD 34.2;LEUSTATIN 10 MG/10 ML VIAL USD 102.78	-	-	Scottsdale,Arizona,85258,United States,
				BRCA 2 Gene Mutation	-	DB03496	CDK2,CDK9,CDK7	FLAVOPIRIDOL	-	-	-	Sedona,Arizona,86336,United States,
				Breast Neoplasms	-	DB05037	CDK2	AT7519	-	-	-	Fullerton,California,92835,United States,
				-	-	DB05149	CHEK1,CHEK2	XL844	-	-	-	Greenbrae,California,94904,United States,
				-	-	DB05169	AURKA	AT9283	-	-	-	Los Angeles,California,90017,United States,
				-	-	DB05198	AURKA	CYC116	-	-	-	Palo Alto,California,94305,United States,
				-	-	DB05220	AURKA	MLN8237	-	-	-	Redondo Beach,California,90277,United States,
				-	-	DB06616	CDK2	BOSUTINIB	-	-	-	San Francisco,California,94115,United States,
				-	-	-	-	-	-	-	-	San Luis Obispo,California,93401,United States,
				-	-	-	-	-	-	-	-	San Marcos,California,92078,United States,
				-	-	-	-	-	-	-	-	Santa Barbara,California,93105,United States,
				-	-	-	-	-	-	-	-	Santa Maria,California,93454,United States,
				-	-	-	-	-	-	-	-	Vallejo,California,94589,United States,
				-	-	-	-	-	-	-	-	Aurora,Colorado,80045,United States,
				-	-	-	-	-	-	-	-	Lakewood,Colorado,80228,United States,
				-	-	-	-	-	-	-	-	Southington,Connecticut,06489,United States,
				-	-	-	-	-	-	-	-	Deerfield Beach,Florida,33442,United States,
				-	-	-	-	-	-	-	-	Jacksonville,Florida,32256,United States,
				-	-	-	-	-	-	-	-	Orlando,Florida,32773,United States,
				-	-	-	-	-	-	-	-	Pembroke Pines,Florida,33028,United States,
				-	-	-	-	-	-	-	-	Plantation,Florida,33324,United States,
				-	-	-	-	-	-	-	-	St. Petersburg,Florida,33705,United States,
				-	-	-	-	-	-	-	-	Skokie,Illinois,60077,United States,
				-	-	-	-	-	-	-	-	Urbana,Illinois,61801,United States,
				-	-	-	-	-	-	-	-	Indianapolis,Indiana,46202,United States,
				-	-	-	-	-	-	-	-	Kansas City,Kansas,66160,United States,
				-	-	-	-	-	-	-	-	Bethesda,Maryland,20889,United States,
				-	-	-	-	-	-	-	-	Ann Arbor,Michigan,48109,United States,
				-	-	-	-	-	-	-	-	Grand Rapids,Michigan,49503,United States,
				-	-	-	-	-	-	-	-	Grand Rapids,Michigan,49506,United States,
				-	-	-	-	-	-	-	-	Royal Oaks,Michigan,48073,United States,
				-	-	-	-	-	-	-	-	Minneapolis,Minnesota,55404,United States,
				-	-	-	-	-	-	-	-	Woodbury,Minnesota,55125,United States,
				-	-	-	-	-	-	-	-	Las Vegas,Nevada,89169,United States,
				-	-	-	-	-	-	-	-	Albany,New York,12206,United States,
				-	-	-	-	-	-	-	-	New York,New York,10060,United States,
				-	-	-	-	-	-	-	-	Asheville,North Carolina,28806,United States,
				-	-	-	-	-	-	-	-	Portland,Oregon,97225,United States,
				-	-	-	-	-	-	-	-	Philadelphia,Pennsylvania,19124,United States,
				-	-	-	-	-	-	-	-	Pittsburgh,Pennsylvania,15213,United States,
				-	-	-	-	-	-	-	-	Germantown,Tennessee,38138,United States,
				-	-	-	-	-	-	-	-	Knoxville,Tennessee,37920,United States,
				-	-	-	-	-	-	-	-	Memphis,Tennessee,38120,United States,
				-	-	-	-	-	-	-	-	Nashville,Tennessee,37203,United States,
				-	-	-	-	-	-	-	-	Austin,Texas,78731,United States,
				-	-	-	-	-	-	-	-	Dallas,Texas,75231,United States,
				-	-	-	-	-	-	-	-	Dallas,Texas,75246,United States,
				-	-	-	-	-	-	-	-	El Paso,Texas,79902,United States,
				-	-	-	-	-	-	-	-	Fort Worth,Texas,76104,United States,
				-	-	-	-	-	-	-	-	Grandview,Texas,79902,United States,
				-	-	-	-	-	-	-	-	Houston,Texas,77024,United States,
				-	-	-	-	-	-	-	-	Houston,Texas,77030,United States,
				-	-	-	-	-	-	-	-	Houston,Texas,77090,United States,
				-	-	-	-	-	-	-	-	Plano,Texas,75075,United States,
				-	-	-	-	-	-	-	-	Round Rock,Texas,78681,United States,
				-	-	-	-	-	-	-	-	Fairfax,Virginia,22031,United States,
				-	-	-	-	-	-	-	-	Norfolk,Virginia,23502,United States,
				-	-	-	-	-	-	-	-	Seattle,Washington,98104,United States,
BRCA1	NCT01989546	Pilot Trial of BMN 673, an Oral PARP Inhibitor, in Patients With Advanced Solid Tumors and Deleterious BRCA Mutations	Phase 1/Phase 2	Advanced Breast Cancer	BMN 673	DB00242	POLE,POLE2	CLADRIBINE	CLADRIBINE 10 MG/10 ML VIAL USD 34.2;LEUSTATIN 10 MG/10 ML VIAL USD 102.78	-	-	National Institutes of Health Clinical Center, 9000 Rockville Pike,For more information at the NIH Clinical Center contact National Cancer Institute Referral Office,Bethesda,Maryland,20892,United States,888-624-1937,
				Advanced Ovarian Cancer	-	DB03496	CDK2,CDK9,CDK7	FLAVOPIRIDOL	-	-	-	-
				Advanced Solid Tumors	-	DB05037	CDK2	AT7519	-	-	-	-
				Primary Peritoneal Cancer	-	DB05149	CHEK1,CHEK2	XL844	-	-	-	-
				-	-	DB05169	AURKA	AT9283	-	-	-	-
				-	-	DB05198	AURKA	CYC116	-	-	-	-
				-	-	DB05220	AURKA	MLN8237	-	-	-	-
				-	-	DB06616	CDK2	BOSUTINIB	-	-	-	-
BRCA1	NCT01990352	Correlate BRCA1 Protein Expression With Response to DNA Damaging Chemotherapy	Phase 2	Breast Cancer	PEGYLATED LIPOSOMAL DOXORUBICIN	DB00242	POLE,POLE2	CLADRIBINE	CLADRIBINE 10 MG/10 ML VIAL USD 34.2;LEUSTATIN 10 MG/10 ML VIAL USD 102.78	-	-	University of Arizona Cancer Center,Dana Lewallen,Tucson,Arizona,85742,United States,DLewallen@uacc.arizona.edu,520-626-2175,
				-	-	DB03496	CDK2,CDK9,CDK7	FLAVOPIRIDOL	-	-	-	-
				-	-	DB05037	CDK2	AT7519	-	-	-	-
				-	-	DB05149	CHEK1,CHEK2	XL844	-	-	-	-
				-	-	DB05169	AURKA	AT9283	-	-	-	-
				-	-	DB05198	AURKA	CYC116	-	-	-	-
				-	-	DB05220	AURKA	MLN8237	-	-	-	-
				-	-	DB06616	CDK2	BOSUTINIB	-	-	-	-
BRCA1	NCT02032823	Olaparib as Adjuvant Treatment in Patients With Germline BRCA Mutated High Risk HER2 Negative Primary Breast Cancer	Phase 3	Breast Cancer	OLAPARIB	DB00242	POLE,POLE2	CLADRIBINE	CLADRIBINE 10 MG/10 ML VIAL USD 34.2;LEUSTATIN 10 MG/10 ML VIAL USD 102.78	-	-	Research Site,Mercy Hospital Fort Smith,Fort Smith,Arkansas,United States,
				-	-	DB03496	CDK2,CDK9,CDK7	FLAVOPIRIDOL	-	-	-	Research Site,Kaiser Permanente-Baldwin Park,Baldwin Park,California,United States,
				-	-	DB05037	CDK2	AT7519	-	-	-	Research Site,Kaiser Permanente-Fresno,Fresno,California,United States,
				-	-	DB05149	CHEK1,CHEK2	XL844	-	-	-	Research Site,Cedars-Sinai Medical Center,Los Angeles,California,United States,
				-	-	DB05169	AURKA	AT9283	-	-	-	Research Site,UCLA / Jonsson Comprehensive Cancer Center,Los Angeles,California,United States,
				-	-	DB05198	AURKA	CYC116	-	-	-	Research Site,Kaiser Permanente-Cadillac,Los Angeles,California,United States,
				-	-	DB05220	AURKA	MLN8237	-	-	-	Research Site,Contra Costa Regional Medical Center,Martinez,California,United States,
				-	-	DB06616	CDK2	BOSUTINIB	-	-	-	Research Site,Palo Alto Medical Foundation Health Care,Palo Alto,California,United States,
				-	-	-	-	-	-	-	-	Research Site,Stanford Cancer Institute,Palo Alto,California,United States,
				-	-	-	-	-	-	-	-	Research Site,Feather River Cancer Center,Paradise,California,United States,
				-	-	-	-	-	-	-	-	Research Site,Kaiser Permanente-Roseville,Roseville,California,United States,
				-	-	-	-	-	-	-	-	Research Site,Kaiser Permanente-Santa Teresa-San Jose,San Jose,California,United States,
				-	-	-	-	-	-	-	-	Research Site,Palo Alto Medical Foundation-Santa Cruz,Santa Cruz,California,United States,
				-	-	-	-	-	-	-	-	Research Site,Kaiser Permanente-South San Francisco,South San Francisco,California,United States,
				-	-	-	-	-	-	-	-	Research Site,Saint Joseph's Medical Center,Stockton,California,United States,
				-	-	-	-	-	-	-	-	Research Site,Palo Atlo Medical Foundation-Sunnyvale,Sunnyvale,California,United States,
				-	-	-	-	-	-	-	-	Research Site,Sunnyvale,California,United States,
				-	-	-	-	-	-	-	-	Research Site,Kaiser Permanente-Woodland Hills,Woodland Hills,California,United States,
				-	-	-	-	-	-	-	-	Research Site,The Shaw Regional Cancer Center,Edwards,Colorado,United States,
				-	-	-	-	-	-	-	-	Research Site,Poudre Valley Hospital,Fort Collins,Colorado,United States,
				-	-	-	-	-	-	-	-	Research Site,Smilow Cancer Hospital-Derby Care Center,Derby,Connecticut,United States,
				-	-	-	-	-	-	-	-	Research Site,Smilow Cancer Hospital Care Center-Fairfield,Fairfield,Connecticut,United States,
				-	-	-	-	-	-	-	-	Research Site,Yale-New Haven Shoreline Medical Center,Guilford,Connecticut,United States,
				-	-	-	-	-	-	-	-	Research Site,Yale University,New Haven,Connecticut,United States,
				-	-	-	-	-	-	-	-	Research Site,Yale-New Haven Hospital Saint Raphael Campus,New Haven,Connecticut,United States,
				-	-	-	-	-	-	-	-	Research Site,Yale-New Haven Hospital North Haven Medical Center,North Haven,Connecticut,United States,
				-	-	-	-	-	-	-	-	Research Site,Smilow Cancer Hospital-Orange Care Center,Orange,Connecticut,United States,
				-	-	-	-	-	-	-	-	Research Site,Smilow Cancer Hospital-Torrington Care Center,Torrington,Connecticut,United States,
				-	-	-	-	-	-	-	-	Research Site,Smilow Cancer Hospital Care Center-Trumbull,Trumbull,Connecticut,United States,
				-	-	-	-	-	-	-	-	Research Site,Smilow Cancer Hospital-Waterbury Care Center,Waterbury,Connecticut,United States,
				-	-	-	-	-	-	-	-	Research Site,Christiana Care Health System-Christiana Hospital,Newark,Delaware,United States,
				-	-	-	-	-	-	-	-	Research Site,Regional Hematology and Oncology PA,Newark,Delaware,United States,
				-	-	-	-	-	-	-	-	Research Site,Medical Oncology Hematology Consultants PA,Newark,Delaware,United States,
				-	-	-	-	-	-	-	-	Research Site,Newark,Delaware,United States,
				-	-	-	-	-	-	-	-	Research Site,MedStar Washington Hospital Center,Washington,District of Columbia,United States,
				-	-	-	-	-	-	-	-	Research Site,MedStar Georgetown University Hospital,Washington,District of Columbia,United States,
				-	-	-	-	-	-	-	-	Research Site,University of Miami Sylvester Comprehensive Cancer Center,Deerfield Beach,Florida,United States,
				-	-	-	-	-	-	-	-	Research Site,University of Florida,Gainesville,Florida,United States,
				-	-	-	-	-	-	-	-	Research Site,Dekalb Medical Center,Decatur,Georgia,United States,
				-	-	-	-	-	-	-	-	Research Site,Northside Hospital,Macon,Georgia,United States,
				-	-	-	-	-	-	-	-	Research Site,Medical Center of Central Georgia,Macon,Georgia,United States,
				-	-	-	-	-	-	-	-	Research Site,Pali Momi Medical Center,Aiea,Hawaii,United States,
				-	-	-	-	-	-	-	-	Research Site,University of Hawaii Cancer Center,Honolulu,Hawaii,United States,
				-	-	-	-	-	-	-	-	Research Site,Queen's Medical Center,Honolulu,Hawaii,United States,
				-	-	-	-	-	-	-	-	Research Site,Straub Clinic and Hospital,Honolulu,Hawaii,United States,
				-	-	-	-	-	-	-	-	Research Site,Oncare Hawaii Inc-POB II,Honolulu,Hawaii,United States,
				-	-	-	-	-	-	-	-	Research Site,Oncare Hawaii Inc-POB I,Honolulu,Hawaii,United States,
				-	-	-	-	-	-	-	-	Research Site,Oncare Hawaii Inc-Kuakini,Kuakini,Hawaii,United States,
				-	-	-	-	-	-	-	-	Research Site,Saint Alphonsus Cancer Care Center-Boise,Boise,Idaho,United States,
				-	-	-	-	-	-	-	-	Research Site,Saint Luke's Mountain States Tumor Institute,Boise,Idaho,United States,
				-	-	-	-	-	-	-	-	Research Site,Saint Luke's Mountain States Tumor Institute - Fruitland,Fruitland,Idaho,United States,
				-	-	-	-	-	-	-	-	Research Site,Saint Luke's Mountain States Tumor Institute - Meridian,Meridian,Idaho,United States,
				-	-	-	-	-	-	-	-	Research Site,Saint Luke's Mountain States Tumor Institute - Nampa,Nampa,Idaho,United States,
				-	-	-	-	-	-	-	-	Research Site,Saint Luke's Mountain States Tumor Institute-Twin Falls,Twin Falls,Idaho,United States,
				-	-	-	-	-	-	-	-	Research Site,Centralia Oncology Clinic,Centralia,Illinois,United States,
				-	-	-	-	-	-	-	-	Research Site,University of Chicago Comprehensive Cancer Center,Chicago,Illinois,United States,
				-	-	-	-	-	-	-	-	Research Site,University of Illinois,Chicago,Illinois,United States,
				-	-	-	-	-	-	-	-	Research Site,Rush University Medical Center,Chicago,Illinois,United States,
				-	-	-	-	-	-	-	-	Research Site,Presence Saint Joseph Hospital-Chicago,Chicago,Illinois,United States,
				-	-	-	-	-	-	-	-	Research Site,Decatur Memorial Hospital,Decatur,Illinois,United States,
				-	-	-	-	-	-	-	-	Research Site,Cancer Care Specialists of Central Illinois,Decatur,Illinois,United States,
				-	-	-	-	-	-	-	-	Research Site,Crossroads Cancer Center,Effingham,Illinois,United States,
				-	-	-	-	-	-	-	-	Research Site,NorthShore University HealthSystem-Evanston Hospital,Evanston,Illinois,United States,
				-	-	-	-	-	-	-	-	Research Site,NorthShore University HealthSystem-Glenbrook Hospital,Glenview,Illinois,United States,
				-	-	-	-	-	-	-	-	Research Site,NorthShore University HealthSystem-Highland Park Hospital,Highland Park,Illinois,United States,
				-	-	-	-	-	-	-	-	Research Site,Loyola University Medical Center,Maywood,Illinois,United States,
				-	-	-	-	-	-	-	-	Research Site,Good Samaritan Regional Health Center,Mount Vernon,Illinois,United States,
				-	-	-	-	-	-	-	-	Research Site,Illinois CancerCare-Peoria,Peoria,Illinois,United States,
				-	-	-	-	-	-	-	-	Research Site,Cadence Cancer Center in Warrenville,Warrenville,Illinois,United States,
				-	-	-	-	-	-	-	-	Research Site,Michiana Hematology Oncology PC-Elkhart,Elkhart,Indiana,United States,
				-	-	-	-	-	-	-	-	Research Site,Parkview Hospital Randallia,Fort Wayne,Indiana,United States,
				-	-	-	-	-	-	-	-	Research Site,Radiation Oncology Associates PC,Fort Wayne,Indiana,United States,
				-	-	-	-	-	-	-	-	Research Site,Indiana University Hospital/Melvin&Bren Simon Cancer Center,Indianapolis,Indiana,United States,
				-	-	-	-	-	-	-	-	Research Site,Indianapolis,Indiana,United States,
				-	-	-	-	-	-	-	-	Research Site,Michiana Hematology Oncology PC-Mishawaka,Mishawaka,Indiana,United States,
				-	-	-	-	-	-	-	-	Research Site,IU Health Ball Memorial Hospital,Muncie,Indiana,United States,
				-	-	-	-	-	-	-	-	Research Site,The Community Hospital,Munster,Indiana,United States,
				-	-	-	-	-	-	-	-	Research Site,Munster,Indiana,United States,
				-	-	-	-	-	-	-	-	Research Site,Michiana Hematology Oncology PC-Plymouth,Plymouth,Indiana,United States,
				-	-	-	-	-	-	-	-	Research Site,Michiana Hematology Oncology PC-South Bend,South Bend,Indiana,United States,
				-	-	-	-	-	-	-	-	Research Site,Michiana Hematology Oncology PC-Westville,Westville,Indiana,United States,
				-	-	-	-	-	-	-	-	Research Site,McFarland Clinic PC-William R Bliss Cancer Center,Ames,Iowa,United States,
				-	-	-	-	-	-	-	-	Research Site,Ames,Iowa,United States,
				-	-	-	-	-	-	-	-	Research Site,Des Moines,Iowa,United States,
				-	-	-	-	-	-	-	-	Research Site,University of Iowa Hospitals and Clinics,Iowa City,Iowa,United States,
				-	-	-	-	-	-	-	-	Research Site,Iowa City,Iowa,United States,
				-	-	-	-	-	-	-	-	Research Site,Mercy Medical Center - North Iowa,Mason City,Iowa,United States,
				-	-	-	-	-	-	-	-	Research Site,Mason City,Iowa,United States,
				-	-	-	-	-	-	-	-	Research Site,Cancer Center of Kansas - Chanute,Chanute,Kansas,United States,
				-	-	-	-	-	-	-	-	Research Site,Cancer Center of Kansas - El Dorado,El Dorado,Kansas,United States,
				-	-	-	-	-	-	-	-	Research Site,Saint Catherine Hospital,Garden City,Kansas,United States,
				-	-	-	-	-	-	-	-	Research Site,Hays Medical Center,Hays,Kansas,United States,
				-	-	-	-	-	-	-	-	Research Site,University of Kansas Cancer Center,Kansas City,Kansas,United States,
				-	-	-	-	-	-	-	-	Research Site,Lawrence Memorial Hospital,Lawrence,Kansas,United States,
				-	-	-	-	-	-	-	-	Research Site,Cancer Center of Kansas - Newton,Newton,Kansas,United States,
				-	-	-	-	-	-	-	-	Research Site,Olathe Medical Center,Olathe,Kansas,United States,
				-	-	-	-	-	-	-	-	Research Site,Salina Regional Health Center,Salina,Kansas,United States,
				-	-	-	-	-	-	-	-	Research Site,Cancer Center of Kansas - Salina,Salina,Kansas,United States,
				-	-	-	-	-	-	-	-	Research Site,Saint Francis Hospital and Medical Center - Topeka,Topeka,Kansas,United States,
				-	-	-	-	-	-	-	-	Research Site,Cancer Center of Kansas - Main Office,Wichita,Kansas,United States,
				-	-	-	-	-	-	-	-	Research Site,Cancer Center of Kansas-Wichita Medical Arts Tower,Wichita,Kansas,United States,
				-	-	-	-	-	-	-	-	Research Site,Cancer Center of Kansas - Winfield,Winfield,Kansas,United States,
				-	-	-	-	-	-	-	-	Research Site,Norton Hospital Pavilion and Medical Campus,Louisville,Kentucky,United States,
				-	-	-	-	-	-	-	-	Research Site,James Graham Brown Cancer Center at University of Louisville,Louisville,Kentucky,United States,
				-	-	-	-	-	-	-	-	Research Site,Mary Bird Perkins Cancer Center,Baton Rouge,Louisiana,United States,
				-	-	-	-	-	-	-	-	Research Site,LSU Health Baton Rouge-North Clinic,Baton Rouge,Louisiana,United States,
				-	-	-	-	-	-	-	-	Research Site,Medical Oncology LLC,Baton Rouge,Louisiana,United States,
				-	-	-	-	-	-	-	-	Research Site,Louisiana Hematology Oncology Associates LLC,Baton Rouge,Louisiana,United States,
				-	-	-	-	-	-	-	-	Research Site,Mary Bird Cancer Center/Saint Tammany Parish,Covington,Louisiana,United States,
				-	-	-	-	-	-	-	-	Research Site,Mary Bird Perkins Cancer Center,Houma,Louisiana,United States,
				-	-	-	-	-	-	-	-	Research Site,Ochsner Medical Center Jefferson,New Orleans,Louisiana,United States,
				-	-	-	-	-	-	-	-	Research Site,Eastern Maine Medical Center,Bangor,Maine,United States,
				-	-	-	-	-	-	-	-	Research Site,Brewer,Maine,United States,
				-	-	-	-	-	-	-	-	Research Site,Mercy Hospital,Portland,Maine,United States,
				-	-	-	-	-	-	-	-	Research Site,Penobscot Bay Medical Center,Rockport,Maine,United States,
				-	-	-	-	-	-	-	-	Research Site,Mercy Medical Center,Baltimore,Maryland,United States,
				-	-	-	-	-	-	-	-	Research Site,MedStar Franklin SquareMedicalCenter/Weinberg Cancer Institute,Baltimore,Maryland,United States,
				-	-	-	-	-	-	-	-	Research Site,University of Maryland/Greenebaum Cancer Center,Baltimore,Maryland,United States,
				-	-	-	-	-	-	-	-	Research Site,Baltimore,Maryland,United States,
				-	-	-	-	-	-	-	-	Research Site,The Memorial Hospital at Easton,Easton,Maryland,United States,
				-	-	-	-	-	-	-	-	Research Site,Frederick,Maryland,United States,
				-	-	-	-	-	-	-	-	Research Site,Frederick Memorial Hospital,Frederick,Maryland,United States,
				-	-	-	-	-	-	-	-	Research Site,Dana-Farber Cancer Institute,Boston,Massachusetts,United States,
				-	-	-	-	-	-	-	-	Research Site,Beth Israel Deaconess Medical Center,Boston,Massachusetts,United States,
				-	-	-	-	-	-	-	-	Research Site,Berkshire Hematology Oncology PC,Pittsfield,Massachusetts,United States,
				-	-	-	-	-	-	-	-	Research Site,Baystate Medical Center,Springfield,Massachusetts,United States,
				-	-	-	-	-	-	-	-	Research Site,St Joseph Mercy Hospital Cancer Care Center,Ann Arbor,Michigan,United States,
				-	-	-	-	-	-	-	-	Research Site,University of Michigan Comprehensive Cancer Center,Ann Arbor,Michigan,United States,
				-	-	-	-	-	-	-	-	Research Site,Wayne State University/Karmanos Cancer Institute,Detroit,Michigan,United States,
				-	-	-	-	-	-	-	-	Research Site,Henry Ford Hospital,Detroit,Michigan,United States,
				-	-	-	-	-	-	-	-	Research Site,Saint John Hospital and Medical Center,Detroit,Michigan,United States,
				-	-	-	-	-	-	-	-	Research Site,Genesys Hurley Cancer Institute,Flint,Michigan,United States,
				-	-	-	-	-	-	-	-	Research Site,Mercy Health Saint Mary's,Grand Rapids,Michigan,United States,
				-	-	-	-	-	-	-	-	Research Site,Spectrum Health at Butterworth Campus,Grand Rapids,Michigan,United States,
				-	-	-	-	-	-	-	-	Research Site,Allegiance Health,Jackson,Michigan,United States,
				-	-	-	-	-	-	-	-	Research Site,West Michigan Cancer Center,Kalamazoo,Michigan,United States,
				-	-	-	-	-	-	-	-	Research Site,Kalamazoo,Michigan,United States,
				-	-	-	-	-	-	-	-	Research Site,Mercy Health Mercy Campus,Muskegon,Michigan,United States,
				-	-	-	-	-	-	-	-	Research Site,William Beaumont Hospital-Royal Oak,Royal Oak,Michigan,United States,
				-	-	-	-	-	-	-	-	Research Site,Royal Oak,Michigan,United States,
				-	-	-	-	-	-	-	-	Research Site,Marie Yeager Cancer Center,Saint Joseph,Michigan,United States,
				-	-	-	-	-	-	-	-	Research Site,Providence Hospital,Southfield,Michigan,United States,
				-	-	-	-	-	-	-	-	Research Site,Munson Medical Center,Traverse City,Michigan,United States,
				-	-	-	-	-	-	-	-	Research Site,William Beaumont Hospital - Troy,Troy,Michigan,United States,
				-	-	-	-	-	-	-	-	Research Site,Saint John Macomb-Oakland Hospital,Warren,Michigan,United States,
				-	-	-	-	-	-	-	-	Research Site,Fairview Ridges Hospital,Burnsville,Minnesota,United States,
				-	-	-	-	-	-	-	-	Research Site,Essentia Health Cancer Center,Duluth,Minnesota,United States,
				-	-	-	-	-	-	-	-	Research Site,Fairview-Southdale Hospital,Edina,Minnesota,United States,
				-	-	-	-	-	-	-	-	Research Site,Unity Hospital,Fridley,Minnesota,United States,
				-	-	-	-	-	-	-	-	Research Site,Minnesota Oncology Hematology PA-Maplewood,Maplewood,Minnesota,United States,
				-	-	-	-	-	-	-	-	Research Site,Saint John's Hospital - Healtheast,Maplewood,Minnesota,United States,
				-	-	-	-	-	-	-	-	Research Site,Abbott-Northwestern Hospital,Minneapolis,Minnesota,United States,
				-	-	-	-	-	-	-	-	Research Site,Hennepin County Medical Center,Minneapolis,Minnesota,United States,
				-	-	-	-	-	-	-	-	Research Site,Mercy Hospital,Minneapolis,Minnesota,United States,
				-	-	-	-	-	-	-	-	Research Site,Health Partners Inc,Minneapolis,Minnesota,United States,
				-	-	-	-	-	-	-	-	Research Site,North Memorial Medical Health Center,Minneapolis,Minnesota,United States,
				-	-	-	-	-	-	-	-	Research Site,Mayo Clinic,Rochester,Minnesota,United States,
				-	-	-	-	-	-	-	-	Research Site,Park Nicollet Clinic - Saint Louis Park,St. Louis Park,Minnesota,United States,
				-	-	-	-	-	-	-	-	Research Site,Regions Hospital,St. Paul,Minnesota,United States,
				-	-	-	-	-	-	-	-	Research Site,United Hospital,St. Paul,Minnesota,United States,
				-	-	-	-	-	-	-	-	Research Site,Ridgeview Medical Center,Waconia,Minnesota,United States,
				-	-	-	-	-	-	-	-	Research Site,Minnesota Oncology Hematology PA-Woodbury,Woodbury,Minnesota,United States,
				-	-	-	-	-	-	-	-	Research Site,University of Mississippi Medical Center,Jackson,Mississippi,United States,
				-	-	-	-	-	-	-	-	Research Site,Saint Francis Medical Center,Cape Girardeau,Missouri,United States,
				-	-	-	-	-	-	-	-	Research Site,Mercy Hospital-Joplin,Joplin,Missouri,United States,
				-	-	-	-	-	-	-	-	Research Site,Joplin,Missouri,United States,
				-	-	-	-	-	-	-	-	Research Site,Truman Medical Center,Kansas City,Missouri,United States,
				-	-	-	-	-	-	-	-	Research Site,The University of Kansas Cancer Center-Lee's Summit,Lees Summit,Missouri,United States,
				-	-	-	-	-	-	-	-	Research Site,Mercy Hospital Springfield,Springfield,Missouri,United States,
				-	-	-	-	-	-	-	-	Research Site,Mercy Hospital Saint Louis,St Louis,Missouri,United States,
				-	-	-	-	-	-	-	-	Research Site,Missouri Baptist Medical Center,St Louis,Missouri,United States,
				-	-	-	-	-	-	-	-	Research Site,Washington University School of Medicine,St. Louis,Missouri,United States,
				-	-	-	-	-	-	-	-	Research Site,St. Louis,Missouri,United States,
				-	-	-	-	-	-	-	-	Research Site,Nebraska Methodist Hospital,Omaha,Nebraska,United States,
				-	-	-	-	-	-	-	-	Research Site,Omaha,Nebraska,United States,
				-	-	-	-	-	-	-	-	Research Site,The Cancer Institute of New Jersey Hamilton,Hamilton,New Jersey,United States,
				-	-	-	-	-	-	-	-	Research Site,Fox Chase Cancer Center at Virtua Memorial Hospital,Mt Holly,New Jersey,United States,
				-	-	-	-	-	-	-	-	Research Site,Rutgers Cancer Institute of New Jersey,New Brunswick,New Jersey,United States,
				-	-	-	-	-	-	-	-	Research Site,Virtua West Jersey Hospital Voorhees,Voorhees,New Jersey,United States,
				-	-	-	-	-	-	-	-	Research Site,University of New Mexico Cancer Center,Albuquerque,New Mexico,United States,
				-	-	-	-	-	-	-	-	Research Site,Albert Einstein College of Medicine,Bronx,New York,United States,
				-	-	-	-	-	-	-	-	Research Site,Montefiore Medical Center-Einstein Campus,Bronx,New York,United States,
				-	-	-	-	-	-	-	-	Research Site,Carolinas Medical Center/Levine Cancer Institute-Pineville,Charlotte,New York,United States,
				-	-	-	-	-	-	-	-	Research Site,Hematology Oncology Assocs. of Central New York-East Syracuse,East Syracuse,New York,United States,
				-	-	-	-	-	-	-	-	Research Site,Lake Success,New York,United States,
				-	-	-	-	-	-	-	-	Research Site,Weill Medical College of Cornell University,New York,New York,United States,
				-	-	-	-	-	-	-	-	Research Site,Laura and Isaac Perlmutter Cancer Center at NYU Langone,New York,New York,United States,
				-	-	-	-	-	-	-	-	Research Site,Mission Hospital-Memorial Campus,Asheville,North Carolina,United States,
				-	-	-	-	-	-	-	-	Research Site,Hope Women's Cancer Centers-Ashville,Asheville,North Carolina,United States,
				-	-	-	-	-	-	-	-	Research Site,Carolinas Medical Center/Levine Cancer Institute,Charlotte,North Carolina,United States,
				-	-	-	-	-	-	-	-	Research Site,Levine Cancer Institute-Tryon,Charlotte,North Carolina,United States,
				-	-	-	-	-	-	-	-	Research Site,Southeastern Medical Oncology Center-Clinton,Clinton,North Carolina,United States,
				-	-	-	-	-	-	-	-	Research Site,Carolinas HealthCare System NorthEast,Concord,North Carolina,United States,
				-	-	-	-	-	-	-	-	Research Site,Duke University Medical Center,Durham,North Carolina,United States,
				-	-	-	-	-	-	-	-	Research Site,CaroMont Regional Medical Center,Gastonia,North Carolina,United States,
				-	-	-	-	-	-	-	-	Research Site,Southeastern Medical Oncology Center-Goldsboro,Goldsboro,North Carolina,United States,
				-	-	-	-	-	-	-	-	Research Site,Cone Health Cancer Center,Greensboro,North Carolina,United States,
				-	-	-	-	-	-	-	-	Research Site,Margaret R Pardee Memorial Hospital,Hendersonville,North Carolina,United States,
				-	-	-	-	-	-	-	-	Research Site,Hendersonville Hematology and Oncology at Pardee,Hendersonville,North Carolina,United States,
				-	-	-	-	-	-	-	-	Research Site,Hendersonville,North Carolina,United States,
				-	-	-	-	-	-	-	-	Research Site,Southeastern Medical Oncology Center-Jacksonville,Jacksonville,North Carolina,United States,
				-	-	-	-	-	-	-	-	Research Site,Kinston Medical Specialists PA,Kinston,North Carolina,United States,
				-	-	-	-	-	-	-	-	Research Site,Kinston,North Carolina,United States,
				-	-	-	-	-	-	-	-	Research Site,FirstHealth of the Carolinas-Moore Regional Hospital,Pinehurst,North Carolina,United States,
				-	-	-	-	-	-	-	-	Research Site,Southeastern Medical Oncology Center-Wilson,Wilson,North Carolina,United States,
				-	-	-	-	-	-	-	-	Research Site,Wake Forest University Health Sciences,Winston-Salem,North Carolina,United States,
				-	-	-	-	-	-	-	-	Research Site,Trinity Cancer Care Center,Minot,North Dakota,United States,
				-	-	-	-	-	-	-	-	Research Site,Akron General Medical Center,Akron,Ohio,United States,
				-	-	-	-	-	-	-	-	Research Site,Akron,Ohio,United States,
				-	-	-	-	-	-	-	-	Research Site,Ohio State University Comprehensive Cancer Center,Columbus,Ohio,United States,
				-	-	-	-	-	-	-	-	Research Site,Columbus NCI Community Oncology Research Program,Columbus,Ohio,United States,
				-	-	-	-	-	-	-	-	Research Site,Samaritan North Health Center,Dayton,Ohio,United States,
				-	-	-	-	-	-	-	-	Research Site,Dayton,Ohio,United States,
				-	-	-	-	-	-	-	-	Research Site,Toledo Clinic Cancer Centers-Maumee,Maumee,Ohio,United States,
				-	-	-	-	-	-	-	-	Research Site,Saint Charles Hospital,Oregon,Ohio,United States,
				-	-	-	-	-	-	-	-	Research Site,Flower Hospital,Sylvania,Ohio,United States,
				-	-	-	-	-	-	-	-	Research Site,Toledo Clinic Cancer Centers-Toledo,Toledo,Ohio,United States,
				-	-	-	-	-	-	-	-	Research Site,Mercy Saint Anne Hospital,Toledo,Ohio,United States,
				-	-	-	-	-	-	-	-	Research Site,University of Oklahoma Health Sciences Center,Oklahoma City,Oklahoma,United States,
				-	-	-	-	-	-	-	-	Research Site,Tulsa Cancer Institute,Tulsa,Oklahoma,United States,
				-	-	-	-	-	-	-	-	Research Site,Kaiser Permanente,Portland,Oregon,United States,
				-	-	-	-	-	-	-	-	Research Site,Providence Portland Medical Center,Portland,Oregon,United States,
				-	-	-	-	-	-	-	-	Research Site,Abington Memorial Hospital,Abington,Pennsylvania,United States,
				-	-	-	-	-	-	-	-	Research Site,Bryn Mawr Hospital,Brynmawr,Pennsylvania,United States,
				-	-	-	-	-	-	-	-	Research Site,Brynmawr,Pennsylvania,United States,
				-	-	-	-	-	-	-	-	Research Site,Geisinger Medical Center,Danville,Pennsylvania,United States,
				-	-	-	-	-	-	-	-	Research Site,Delaware County Memorial Hospital,Drexel Hill,Pennsylvania,United States,
				-	-	-	-	-	-	-	-	Research Site,Harrisburg,Pennsylvania,United States,
				-	-	-	-	-	-	-	-	Research Site,PinnacleHealth Cancer Center-Community Campus,Harrisburg,Pennsylvania,United States,
				-	-	-	-	-	-	-	-	Research Site,Geisinger Medical Center-Cancer Center Hazleton,Hazleton,Pennsylvania,United States,
				-	-	-	-	-	-	-	-	Research Site,Penn State Milton S Hershey Medical Center,Hershey,Pennsylvania,United States,
				-	-	-	-	-	-	-	-	Research Site,Riddle Memorial Hospital,Media,Pennsylvania,United States,
				-	-	-	-	-	-	-	-	Research Site,Paoli Memorial Hospital,Paoli,Pennsylvania,United States,
				-	-	-	-	-	-	-	-	Research Site,Paoli,Pennsylvania,United States,
				-	-	-	-	-	-	-	-	Research Site,University of Pennsylvania/Abramson Cancer Center,Philadelphia,Pennsylvania,United States,
				-	-	-	-	-	-	-	-	Research Site,Thomas Jefferson University Hospital,Philadelphia,Pennsylvania,United States,
				-	-	-	-	-	-	-	-	Research Site,Fox Chase Cancer Center,Philadelphia,Pennsylvania,United States,
				-	-	-	-	-	-	-	-	Research Site,Phoenixville Hospital,Phoenixville,Pennsylvania,United States,
				-	-	-	-	-	-	-	-	Research Site,Phoenixville,Pennsylvania,United States,
				-	-	-	-	-	-	-	-	Research Site,Allegheny General Hospital,Pittsburgh,Pennsylvania,United States,
				-	-	-	-	-	-	-	-	Research Site,University of Pittsburgh Cancer Institute (UPCI),Pittsburgh,Pennsylvania,United States,
				-	-	-	-	-	-	-	-	Research Site,Geisinger Medical Group,State College,Pennsylvania,United States,
				-	-	-	-	-	-	-	-	Research Site,Reading Hospital,West Reading,Pennsylvania,United States,
				-	-	-	-	-	-	-	-	Research Site,West Reading,Pennsylvania,United States,
				-	-	-	-	-	-	-	-	Research Site,Geisinger Wyoming Valley/Henry Cancer Center,Wilkes Barre,Pennsylvania,United States,
				-	-	-	-	-	-	-	-	Research Site,Susquehanna Cancer Center,Williamsport,Pennsylvania,United States,
				-	-	-	-	-	-	-	-	Research Site,Williamsport,Pennsylvania,United States,
				-	-	-	-	-	-	-	-	Research Site,Wynnewood,Pennsylvania,United States,
				-	-	-	-	-	-	-	-	Research Site,WellSpan Health-York Hospital,York,Pennsylvania,United States,
				-	-	-	-	-	-	-	-	Research Site,AnMed Health Cancer Center,Anderson,South Carolina,United States,
				-	-	-	-	-	-	-	-	Research Site,Medical University of South Carolina,Charleston,South Carolina,United States,
				-	-	-	-	-	-	-	-	Research Site,Greenville Health System Cancer Institute-Eastside,Greenville,South Carolina,United States,
				-	-	-	-	-	-	-	-	Research Site,Greenville Health System Cancer Institute-Butternut,Greenville,South Carolina,United States,
				-	-	-	-	-	-	-	-	Research Site,Greenville Health System Cancer Institute-Faris,Greenville,South Carolina,United States,
				-	-	-	-	-	-	-	-	Research Site,Saint Francis Cancer Center,Greenville,South Carolina,United States,
				-	-	-	-	-	-	-	-	Research Site,Self Regional Healthcare,Greenwood,South Carolina,United States,
				-	-	-	-	-	-	-	-	Research Site,Greenville Health System Cancer Institute-Greer,Greer,South Carolina,United States,
				-	-	-	-	-	-	-	-	Research Site,Greenville Health System Cancer Institute-Seneca,Seneca,South Carolina,United States,
				-	-	-	-	-	-	-	-	Research Site,Spartanburg Regional Medical Center,Spartanburg,South Carolina,United States,
				-	-	-	-	-	-	-	-	Research Site,Greenville Health System Cancer Institute-Spartanburg,Spartanburg,South Carolina,United States,
				-	-	-	-	-	-	-	-	Research Site,The Methodist Hospital System,Houston,Texas,United States,
				-	-	-	-	-	-	-	-	Research Site,Covenant Medical Center-Lakeside,Lubbock,Texas,United States,
				-	-	-	-	-	-	-	-	Research Site,Scott and White Memorial Hospital,Temple,Texas,United States,
				-	-	-	-	-	-	-	-	Research Site,American Fork Hospital / Huntsman Intermountain Cancer Center,American Fork,Utah,United States,
				-	-	-	-	-	-	-	-	Research Site,Intermountain Medical Center,Murray,Utah,United States,
				-	-	-	-	-	-	-	-	Research Site,Utah Valley Regional Medical Center,Provo,Utah,United States,
				-	-	-	-	-	-	-	-	Research Site,Dixie Medical Center Regional Cancer Center,Saint George,Utah,United States,
				-	-	-	-	-	-	-	-	Research Site,Central Vermont Medical Center,Berlin,Vermont,United States,
				-	-	-	-	-	-	-	-	Research Site,University of Vermont College of Medicine,Burlington,Vermont,United States,
				-	-	-	-	-	-	-	-	Research Site,Medical Oncology Hematology Associates of Northern VirginiaLtd,Fairfax,Virginia,United States,
				-	-	-	-	-	-	-	-	Research Site,Hematology Oncology Associates of Fredericksburg Inc,Fredericksburg,Virginia,United States,
				-	-	-	-	-	-	-	-	Research Site,Lynchburg Hematology-Oncology Clinic,Lynchburg,Virginia,United States,
				-	-	-	-	-	-	-	-	Research Site,Bon Secours Saint Francis Medical Center,Midlothian,Virginia,United States,
				-	-	-	-	-	-	-	-	Research Site,Virginia Commonwealth University/Massey Cancer Center,Richmond,Virginia,United States,
				-	-	-	-	-	-	-	-	Research Site,Bon Secours Saint Mary's Hospital,Richmond,Virginia,United States,
				-	-	-	-	-	-	-	-	Research Site,VCU Community Memorial Health Center,South Hill,Virginia,United States,
				-	-	-	-	-	-	-	-	Research Site,Swedish Medical Center-First Hill,Seattle,Washington,United States,
				-	-	-	-	-	-	-	-	Research Site,West Virginia University Charleston,Charleston,West Virginia,United States,
				-	-	-	-	-	-	-	-	Research Site,Aurora Cancer Care-Burlington,Burlington,Wisconsin,United States,
				-	-	-	-	-	-	-	-	Research Site,Aurora Cancer Care-Southern Lakes,Elkhorn,Wisconsin,United States,
				-	-	-	-	-	-	-	-	Research Site,Aurora Cancer Care-Grafton,Grafton,Wisconsin,United States,
				-	-	-	-	-	-	-	-	Research Site,Saint Vincent Hospital,Green Bay,Wisconsin,United States,
				-	-	-	-	-	-	-	-	Research Site,Aurora Cancer Care-Kenosha South,Kenosha,Wisconsin,United States,
				-	-	-	-	-	-	-	-	Research Site,Aurora Advanced Healthcare Inc-Menomonee Falls,Menomonee Falls,Wisconsin,United States,
				-	-	-	-	-	-	-	-	Research Site,Aurora Cancer Care-Milwaukee,Milwaukee,Wisconsin,United States,
				-	-	-	-	-	-	-	-	Research Site,Aurora Sinai Medical Center,Milwaukee,Wisconsin,United States,
				-	-	-	-	-	-	-	-	Research Site,Aurora Saint Luke's Medical Center,Milwaukee,Wisconsin,United States,
				-	-	-	-	-	-	-	-	Research Site,D N Greenwald Center,Mukwonago,Wisconsin,United States,
				-	-	-	-	-	-	-	-	Research Site,Oconomowoc Memorial Hospital-ProHealth Care Inc,Oconomowoc,Wisconsin,United States,
				-	-	-	-	-	-	-	-	Research Site,Aurora Medical Center in Summit,Summit,Wisconsin,United States,
				-	-	-	-	-	-	-	-	Research Site,Waukesha Memorial Hospital,Waukesha,Wisconsin,United States,
				-	-	-	-	-	-	-	-	Research Site,Aurora Cancer Care-Waukesha,Waukesha,Wisconsin,United States,
				-	-	-	-	-	-	-	-	Research Site,Aurora Cancer Care-Milwaukee West,Wauwatosa,Wisconsin,United States,
				-	-	-	-	-	-	-	-	Research Site,Aurora West Allis Medical Center,West Allis,Wisconsin,United States,
BRCA1	NCT02163694	A Phase 3 Randomized, Placebo-controlled Trial of Carboplatin and Paclitaxel With or Without Veliparib (ABT-888) in HER2-negative Metastatic or Locally Advanced Unresectable BRCA-associated Breast Cancer	Phase 3	Metastatic Breast Cancer	VELIPARIB	DB00242	POLE,POLE2	CLADRIBINE	CLADRIBINE 10 MG/10 ML VIAL USD 34.2;LEUSTATIN 10 MG/10 ML VIAL USD 102.78	-	-	Site Reference ID/Investigator# 125011,Site Reference ID/Investigator# 125011, DO,Gilbert,Arizona,85234,United States,
				-	CARBOPLATIN	DB03496	CDK2,CDK9,CDK7	FLAVOPIRIDOL	-	-	-	Site Reference ID/Investigator# 124992,Site Reference ID/Investigator# 124992, MD,Little Rock,Arkansas,72205,United States,
				-	PACLITAXEL	DB05037	CDK2	AT7519	-	-	-	Site Reference ID/Investigator# 127117,Site Reference ID/Investigator# 127117, MD,Duarte,California,91010,United States,
				-	-	DB05149	CHEK1,CHEK2	XL844	-	-	-	Site Reference ID/Investigator# 136078,Site Reference ID/Investigator# 136078, MD,Fresno,California,93720,United States,
				-	-	DB05169	AURKA	AT9283	-	-	-	Site Reference ID/Investigator# 124991,Site Reference ID/Investigator# 124991, MD,La Jolla,California,92093-0698,United States,
				-	-	DB05198	AURKA	CYC116	-	-	-	Site Reference ID/Investigator# 130058,Site Reference ID/Investigator# 130058, MD,Newport Beach,California,92663,United States,
				-	-	DB05220	AURKA	MLN8237	-	-	-	Site Reference ID/Investigator# 128860,Site Reference ID/Investigator# 128860, MD,Santa Ana,California,92705,United States,
				-	-	DB06616	CDK2	BOSUTINIB	-	-	-	Site Reference ID/Investigator# 128520,Site Reference ID/Investigator# 128520, MD,Whittier,California,90603,United States,
				-	-	-	-	-	-	-	-	Site Reference ID/Investigator# 124983,Site Reference ID/Investigator# 124983, MD,Aurora,Colorado,80045,United States,
				-	-	-	-	-	-	-	-	Site Reference ID/Investigator# 131768,Site Reference ID/Investigator# 131768, MD,Denver,Colorado,80218,United States,
				-	-	-	-	-	-	-	-	Site Reference ID/Investigator# 133509,Site Reference ID/Investigator# 133509, MD,Norwalk,Connecticut,06856,United States,
				-	-	-	-	-	-	-	-	Site Reference ID/Investigator# 125013,Site Reference ID/Investigator# 125013, MD,Boca Raton,Florida,33486,United States,
				-	-	-	-	-	-	-	-	Site Reference ID/Investigator# 125012,Site Reference ID/Investigator# 125012, MD,Fort Lauderdale,Florida,33308,United States,
				-	-	-	-	-	-	-	-	Site Reference ID/Investigator# 128279,Site Reference ID/Investigator# 128279, MD,Pensacola,Florida,32504,United States,
				-	-	-	-	-	-	-	-	Site Reference ID/Investigator# 124990,Site Reference ID/Investigator# 124990, MD,Tampa,Florida,33612,United States,
				-	-	-	-	-	-	-	-	Site Reference ID/Investigator# 125007,Site Reference ID/Investigator# 125007, MD,West Palm Beach,Florida,33401,United States,
				-	-	-	-	-	-	-	-	Site Reference ID/Investigator# 133192,Site Reference ID/Investigator# 133192, MD,Atlanta,Georgia,30322,United States,
				-	-	-	-	-	-	-	-	Site Reference ID/Investigator# 125024,Site Reference ID/Investigator# 125024, MD,Decatur,Georgia,30033,United States,
				-	-	-	-	-	-	-	-	Site Reference ID/Investigator# 127576,Site Reference ID/Investigator# 127576, MD,Chicago,Illinois,60612,United States,
				-	-	-	-	-	-	-	-	Site Reference ID/Investigator# 124996,Site Reference ID/Investigator# 124996, MD,Evanston,Illinois,60201,United States,
				-	-	-	-	-	-	-	-	Site Reference ID/Investigator# 124986,Site Reference ID/Investigator# 124986, MD,Zion,Illinois,60099,United States,
				-	-	-	-	-	-	-	-	Site Reference ID/Investigator# 129904,Site Reference ID/Investigator# 129904, MD,Ames,Iowa,50010-3014,United States,
				-	-	-	-	-	-	-	-	Site Reference ID/Investigator# 125015,Site Reference ID/Investigator# 125015, MD,Baltimore,Maryland,21287-0013,United States,
				-	-	-	-	-	-	-	-	Site Reference ID/Investigator# 139461,Site Reference ID/Investigator# 139461, MD,Springfield,Massachusetts,01199,United States,
				-	-	-	-	-	-	-	-	Site Reference ID/Investigator# 129067,Site Reference ID/Investigator# 129067, MD,Worcester,Massachusetts,01655,United States,
				-	-	-	-	-	-	-	-	Site Reference ID/Investigator# 134497,Site Reference ID/Investigator# 134497, MD,Detroit,Michigan,48202,United States,
				-	-	-	-	-	-	-	-	Site Reference ID/Investigator# 133568,Site Reference ID/Investigator# 133568, MD,Grand Rapids,Michigan,49503,United States,
				-	-	-	-	-	-	-	-	Site Reference ID/Investigator# 125019,Site Reference ID/Investigator# 125019, MD,Royal Oak,Michigan,48073,United States,
				-	-	-	-	-	-	-	-	Site Reference ID/Investigator# 131352,Site Reference ID/Investigator# 131352, MD,Jackson,Mississippi,39213,United States,
				-	-	-	-	-	-	-	-	Site Reference ID/Investigator# 125023,Site Reference ID/Investigator# 125023, MD,Kansas City,Missouri,64111,United States,
				-	-	-	-	-	-	-	-	Site Reference ID/Investigator# 132711,Site Reference ID/Investigator# 132711, MD,Lincoln,Nebraska,68506,United States,
				-	-	-	-	-	-	-	-	Site Reference ID/Investigator# 125349,Site Reference ID/Investigator# 125349, MD,Albuquerque,New Mexico,87106,United States,
				-	-	-	-	-	-	-	-	Site Reference ID/Investigator# 136010,Site Reference ID/Investigator# 136010, MD,Albuquerque,New Mexico,87106,United States,
				-	-	-	-	-	-	-	-	Site Reference ID/Investigator# 125001,Site Reference ID/Investigator# 125001, MD,New York,New York,10011,United States,
				-	-	-	-	-	-	-	-	Site Reference ID/Investigator# 125003,Site Reference ID/Investigator# 125003, MD,New York,New York,10011,United States,
				-	-	-	-	-	-	-	-	Site Reference ID/Investigator# 134248,Site Reference ID/Investigator# 134248, MD,Asheville,North Carolina,28801,United States,
				-	-	-	-	-	-	-	-	Site Reference ID/Investigator# 124999,Site Reference ID/Investigator# 124999, MD,Durham,North Carolina,27701,United States,
				-	-	-	-	-	-	-	-	Site Reference ID/Investigator# 134849,Site Reference ID/Investigator# 134849, MD,Toledo,Ohio,43614,United States,
				-	-	-	-	-	-	-	-	Site Reference ID/Investigator# 134229,Site Reference ID/Investigator# 134229, MD,Portland,Oregon,97239,United States,
				-	-	-	-	-	-	-	-	Site Reference ID/Investigator# 130059,Site Reference ID/Investigator# 130059, MD,Allentown,Pennsylvania,18103,United States,
				-	-	-	-	-	-	-	-	Site Reference ID/Investigator# 124997,Site Reference ID/Investigator# 124997, MD,Hershey,Pennsylvania,17033,United States,
				-	-	-	-	-	-	-	-	Site Reference ID/Investigator# 135094,Site Reference ID/Investigator# 135094, MD,Pittsburgh,Pennsylvania,15212,United States,
				-	-	-	-	-	-	-	-	Site Reference ID/Investigator# 125005,Site Reference ID/Investigator# 125005, MD,Pittsburgh,Pennsylvania,15213,United States,
				-	-	-	-	-	-	-	-	Site Reference ID/Investigator# 137740,Site Reference ID/Investigator# 137740, MD,Arlington,Texas,76012,United States,
				-	-	-	-	-	-	-	-	Site Reference ID/Investigator# 124989,Site Reference ID/Investigator# 124989, MD,Dallas,Texas,75390-8852,United States,
				-	-	-	-	-	-	-	-	Site Reference ID/Investigator# 125353,Site Reference ID/Investigator# 125353, MD,Houston,Texas,77030,United States,
				-	-	-	-	-	-	-	-	Site Reference ID/Investigator# 125350,Site Reference ID/Investigator# 125350, MD,Burlington,Vermont,05401,United States,
				-	-	-	-	-	-	-	-	Site Reference ID/Investigator# 125021,Site Reference ID/Investigator# 125021, MD,Seattle,Washington,98104,United States,
				-	-	-	-	-	-	-	-	Site Reference ID/Investigator# 131534,Site Reference ID/Investigator# 131534, MD,Seattle,Washington,98104,United States,
				-	-	-	-	-	-	-	-	Site Reference ID/Investigator# 131548,Site Reference ID/Investigator# 131548, MD,Seattle,Washington,98104,United States,
				-	-	-	-	-	-	-	-	Site Reference ID/Investigator# 131549,Site Reference ID/Investigator# 131549, MD,Seattle,Washington,98104,United States,
				-	-	-	-	-	-	-	-	Site Reference ID/Investigator# 125344,Site Reference ID/Investigator# 125344, MD,Tacoma,Washington,98405,United States,
BRCA1	NCT02203513	A Phase II Single Arm Pilot Study of the Chk1/2 Inhibitor (LY2606368) in BRCA1/2 Mutation Associated Breast or Ovarian Cancer, Triple Negative Breast Cancer, High Grade Serous Ovarian Cancer, and Metastatic Castrate-Resistant Prostate Cancer	Phase 2	Breast Cancer	LY2606368	DB00242	POLE,POLE2	CLADRIBINE	CLADRIBINE 10 MG/10 ML VIAL USD 34.2;LEUSTATIN 10 MG/10 ML VIAL USD 102.78	-	-	National Institutes of Health Clinical Center, 9000 Rockville Pike,For more information at the NIH Clinical Center contact National Cancer Institute Referral Office,Bethesda,Maryland,20892,United States,888-624-1937,
				Ovarian Cancer	-	DB03496	CDK2,CDK9,CDK7	FLAVOPIRIDOL	-	-	-	-
				mCRPC	-	DB05037	CDK2	AT7519	-	-	-	-
				-	-	DB05149	CHEK1,CHEK2	XL844	-	-	-	-
				-	-	DB05169	AURKA	AT9283	-	-	-	-
				-	-	DB05198	AURKA	CYC116	-	-	-	-
				-	-	DB05220	AURKA	MLN8237	-	-	-	-
				-	-	DB06616	CDK2	BOSUTINIB	-	-	-	-
BRCA1	NCT02282020	Olaparib Treatment in Relapsed Germline Breast Cancer Susceptibility Gene (BRCA) Mutated Ovarian Cancer Patients Who Have Progressed at Least 6 Months After Last Platinum Treatment and Have Received at Least 2 Prior Platinum Treatments	Phase 3	Relapsed Ovarian Cancer, BRCA Mutation, Platinum Sensitivity	OLAPARIB	DB00242	POLE,POLE2	CLADRIBINE	CLADRIBINE 10 MG/10 ML VIAL USD 34.2;LEUSTATIN 10 MG/10 ML VIAL USD 102.78	-	-	Research Site,Birmingham,Alabama,United States,
				-	SINGLE AGENT CHEMOTHERAPY	DB03496	CDK2,CDK9,CDK7	FLAVOPIRIDOL	-	-	-	Research Site,Mobile,Alabama,United States,
				-	-	DB05037	CDK2	AT7519	-	-	-	Research Site,Tucson,Arizona,United States,
				-	-	DB05149	CHEK1,CHEK2	XL844	-	-	-	Research Site,Los Angeles,California,United States,
				-	-	DB05169	AURKA	AT9283	-	-	-	Research Site,Sacramento,California,United States,
				-	-	DB05198	AURKA	CYC116	-	-	-	Research Site,San Francisco,California,United States,
				-	-	DB05220	AURKA	MLN8237	-	-	-	Research Site,Aurora,Colorado,United States,
				-	-	DB06616	CDK2	BOSUTINIB	-	-	-	Research Site,Littleton,Colorado,United States,
				-	-	-	-	-	-	-	-	Research Site,New Britain,Connecticut,United States,
				-	-	-	-	-	-	-	-	Research Site,Tampa,Florida,United States,
				-	-	-	-	-	-	-	-	Research Site,Augusta,Georgia,United States,
				-	-	-	-	-	-	-	-	Research Site,Covington,Louisiana,United States,
				-	-	-	-	-	-	-	-	Research Site,Baltimore,Maryland,United States,
				-	-	-	-	-	-	-	-	Research Site,Boston,Massachusetts,United States,
				-	-	-	-	-	-	-	-	Research Site,Detroit,Michigan,United States,
				-	-	-	-	-	-	-	-	Research Site,Camden,New Jersey,United States,
				-	-	-	-	-	-	-	-	Research Site,Morristown,New Jersey,United States,
				-	-	-	-	-	-	-	-	Research Site,Albany,New York,United States,
				-	-	-	-	-	-	-	-	Research Site,Mineola,New York,United States,
				-	-	-	-	-	-	-	-	Research Site,Chapel Hill,North Carolina,United States,
				-	-	-	-	-	-	-	-	Research Site,Columbus,Ohio,United States,
				-	-	-	-	-	-	-	-	Research Site,Springfield,Oregon,United States,
				-	-	-	-	-	-	-	-	Research Site,Abington,Pennsylvania,United States,
				-	-	-	-	-	-	-	-	Research Site,Knoxville,Tennessee,United States,
				-	-	-	-	-	-	-	-	Research Site,Nashville,Tennessee,United States,
				-	-	-	-	-	-	-	-	Research Site,Bedford,Texas,United States,
				-	-	-	-	-	-	-	-	Research Site,Houston,Texas,United States,
				-	-	-	-	-	-	-	-	Research Site,Milwaukee,Wisconsin,United States,
BRCA1	NCT02314156	Transdermal or Oral Telapristone Acetate in Treating Patients Undergoing Mastectomy	Phase 2	BRCA1 Mutation Carrier	TELAPRISTONE ACETATE	DB00242	POLE,POLE2	CLADRIBINE	CLADRIBINE 10 MG/10 ML VIAL USD 34.2;LEUSTATIN 10 MG/10 ML VIAL USD 102.78	-	-	Northwestern University,Seema A. Khan,Chicago,Illinois,60611,United States,skhan@nmh.org,312-503-2112,
				BRCA2 Mutation Carrier	-	DB03496	CDK2,CDK9,CDK7	FLAVOPIRIDOL	-	-	-	Memorial Sloan-Kettering Cancer Center,Melissa L. Pilewskie,New York,New York,10065,United States,pilewskm@mskcc.org,646-888-4590,
				Ductal Breast Carcinoma In Situ	-	DB05037	CDK2	AT7519	-	-	-	-
				Lobular Breast Carcinoma In Situ	-	DB05149	CHEK1,CHEK2	XL844	-	-	-	-
				Stage 0 Breast Cancer	-	DB05169	AURKA	AT9283	-	-	-	-
				Stage IA Breast Cancer	-	DB05198	AURKA	CYC116	-	-	-	-
				Stage IB Breast Cancer	-	DB05220	AURKA	MLN8237	-	-	-	-
				Stage IIA Breast Cancer	-	DB06616	CDK2	BOSUTINIB	-	-	-	-
				Stage IIB Breast Cancer	-	-	-	-	-	-	-	-
BRCA1	NCT02393794	Romidepsin Plus Cisplatin in Locally Recurrent or Metastatic Triple Negative Breast Cancer (TNBC)	Phase 1/Phase 2	Breast Cancer	CISPLATIN	DB00242	POLE,POLE2	CLADRIBINE	CLADRIBINE 10 MG/10 ML VIAL USD 34.2;LEUSTATIN 10 MG/10 ML VIAL USD 102.78	-	-	University of Kansas Cancer Center - Clinical Research Center,Kerry Hepler,Fairway,Kansas,66205,United States,khepler@kumc.edu,913-945-7552,
				Triple-Negative Breast Cancer	ROMIDEPSIN	DB03496	CDK2,CDK9,CDK7	FLAVOPIRIDOL	-	-	-	-
				-	-	DB05037	CDK2	AT7519	-	-	-	-
				-	-	DB05149	CHEK1,CHEK2	XL844	-	-	-	-
				-	-	DB05169	AURKA	AT9283	-	-	-	-
				-	-	DB05198	AURKA	CYC116	-	-	-	-
				-	-	DB05220	AURKA	MLN8237	-	-	-	-
				-	-	DB06616	CDK2	BOSUTINIB	-	-	-	-
BRCA1	NCT02401347	Talazoparib Beyond BRCA (TBB) Trial	Phase 2	Advanced Breast Cancer	TALAZOPARIB TOSYLATE	DB00242	POLE,POLE2	CLADRIBINE	CLADRIBINE 10 MG/10 ML VIAL USD 34.2;LEUSTATIN 10 MG/10 ML VIAL USD 102.78	-	-	Stanford University Hospitals and Clinics,Melinda L. Telli, M.D.,Stanford,California,94305,United States,peijenc@stanford.edu,650-725-0866,
				HER2/Neu Negative	-	DB03496	CDK2,CDK9,CDK7	FLAVOPIRIDOL	-	-	-	-
				Triple-Negative Breast Cancer	-	DB05037	CDK2	AT7519	-	-	-	-
				-	-	DB05149	CHEK1,CHEK2	XL844	-	-	-	-
				-	-	DB05169	AURKA	AT9283	-	-	-	-
				-	-	DB05198	AURKA	CYC116	-	-	-	-
				-	-	DB05220	AURKA	MLN8237	-	-	-	-
				-	-	DB06616	CDK2	BOSUTINIB	-	-	-	-
BRCA1	NCT02482311	Safety, Tolerance, PK, and Anti-tumour Activity of AZD1775 Monotherapy in Patients With Advanced Solid Tumours	Phase 1	Ovarian Cancer, TNBC, SCLC, Other Solid Tumours	AZD 1775	DB00242	POLE,POLE2	CLADRIBINE	CLADRIBINE 10 MG/10 ML VIAL USD 34.2;LEUSTATIN 10 MG/10 ML VIAL USD 102.78	-	-	Research Site,Fayetteville,Arkansas,United States,
				-	-	DB03496	CDK2,CDK9,CDK7	FLAVOPIRIDOL	-	-	-	Research Site,Fort Myers,Florida,United States,
				-	-	DB05037	CDK2	AT7519	-	-	-	Research Site,Detroit,Michigan,United States,
				-	-	DB05149	CHEK1,CHEK2	XL844	-	-	-	Research Site,Oklahoma City,Oklahoma,United States,
				-	-	DB05169	AURKA	AT9283	-	-	-	Research Site,Nashville,Tennessee,United States,
				-	-	DB05198	AURKA	CYC116	-	-	-	Research Site,Milwaukee,Wisconsin,United States,
				-	-	DB05220	AURKA	MLN8237	-	-	-	-
				-	-	DB06616	CDK2	BOSUTINIB	-	-	-	-
BRCA1	NCT02561832	A Phase I, Open-Label, 2 Part Multicentre Study to Assess the Safety, Tolerability and Efficacy of Olaparib in Combination With Carboplatin in Patients With HER-2 Negative Breast Cancer	Phase 1	Breast Cancer	CYCLOPHOSPHAMIDE	DB00242	POLE,POLE2	CLADRIBINE	CLADRIBINE 10 MG/10 ML VIAL USD 34.2;LEUSTATIN 10 MG/10 ML VIAL USD 102.78	-	-	Research Site,New York,New York,United States,
				-	OLAPARIB	DB03496	CDK2,CDK9,CDK7	FLAVOPIRIDOL	-	-	-	Research Site,Stony Brook,New York,United States,
				-	ANTHRACYCLINE	DB05037	CDK2	AT7519	-	-	-	Research Site,Memphis,Tennessee,United States,
				-	CARBOPLATIN	DB05149	CHEK1,CHEK2	XL844	-	-	-	-
				-	-	DB05169	AURKA	AT9283	-	-	-	-
				-	-	DB05198	AURKA	CYC116	-	-	-	-
				-	-	DB05220	AURKA	MLN8237	-	-	-	-
				-	-	DB06616	CDK2	BOSUTINIB	-	-	-	-
BRCA2	NCT01670500	Cisplatin vs. Doxorubicin/Cyclophosphamide in BrCa	Phase 2	Breast Cancer	CYCLOPHOSPHAMIDE	DB00242	POLE,POLE2	CLADRIBINE	CLADRIBINE 10 MG/10 ML VIAL USD 34.2;LEUSTATIN 10 MG/10 ML VIAL USD 102.78	-	-	University of Colorado Cancer Center,Virginia Borges, MD,Aurora,Colorado,80045,United States,virginia.borges@ucdenver.edu,303-724-0186,
				-	CISPLATIN	DB05149	CHEK1	XL844	-	-	-	Yale School of Medicine,Erin Hofstatter, MD,New Haven,Connecticut,06520,United States,erin.hofstatter@yale.edu,203-737-1600,
				-	DOXORUBICIN	-	-	-	-	-	-	Georgetown University Medical Center,Claudine Isaacs, MD,Washington D.C.,District of Columbia,20007,United States,isaacsc@georgetown.edu,
				-	-	-	-	-	-	-	-	Johns Hopkins,Antonio Wolff, MD,Baltimore,Maryland,21287,United States,awolff@jhmi.edu,
				-	-	-	-	-	-	-	-	Massachusetts General Hospital,Steven Isakoff, MD, PhD,Boston,Massachusetts,02114,United States,sisakoff@partners.org,617-726-4920,
				-	-	-	-	-	-	-	-	Beth Israel Deaconess Medical Center,Nadine Tung, MD,Boston,Massachusetts,02215,United States,ntung@bidmc.harvard.edu,617-667-7081,
				-	-	-	-	-	-	-	-	Dana-Farber Cancer Institute,Judy Garber, MD, MPH,Boston,Massachusetts,02215,United States,jegarber@partners.org,617-632-2282,
				-	-	-	-	-	-	-	-	New Hampshire Oncology-Hematology,Douglas Weckstein, MD,Hooksett,New Hampshire,03106,United States,d.weckstein@nhoh.com,603-622-6484,
				-	-	-	-	-	-	-	-	Rutgers Cancer Institute of New Jersey,Deborah Toppmeyer, MD,New Brunswick,New Jersey,08901,United States,toppmede@umdnj.edu,732-235-6789,
				-	-	-	-	-	-	-	-	University of Pennsylvania Abramson Cancer Center,Susan Domchek, MD,Philadelphia,Pennsylvania,19104,United States,susan.domchek@uphs.upenn.edu,215-615-3360,
				-	-	-	-	-	-	-	-	Women and Infants Hospital,Robert Legare, MD,Providence,Rhode Island,02905,United States,rlegare@wihri.org,401-453-7540,
				-	-	-	-	-	-	-	-	MD Anderson Cancer Center,Banu Arun, MD,Houston,Texas,77030,United States,barun@mdanderson.org,713-792-2817,
BRCA2	NCT01905046	Metformin Hydrochloride in Patients With Atypical Hyperplasia or In Situ Breast Cancer to Placebo in Decreasing Atypical Cells in Patients With Atypical Hyperplasia or in Situ Breast Cancer	Phase 3	Atypical Ductal Breast Hyperplasia	METFORMIN HYDROCHLORIDE	DB00242	POLE,POLE2	CLADRIBINE	CLADRIBINE 10 MG/10 ML VIAL USD 34.2;LEUSTATIN 10 MG/10 ML VIAL USD 102.78	-	-	City of Hope Comprehensive Cancer Center,Victoria Seewaldt, MD,Duarte,California,91010,United States,626-471-7321,
				BRCA1 Mutation Carrier	-	DB05149	CHEK1	XL844	-	-	-	Mayo Clinic,Sandhya Pruthi, MD,Rochester,Minnesota,55905,United States,507-538-0289,
				BRCA2 Mutation Carrier	-	-	-	-	-	-	-	Roswell Park Cancer Institute,Jessica Young, MD,Buffalo,New York,14263,United States,716-845-2918,
				Ductal Breast Carcinoma in Situ	-	-	-	-	-	-	-	Columbia University-Herbert Irving Cancer Center,Katherine Crew, MD,New York,New York,10032,United States,212-305-1732,
				Lobular Breast Carcinoma in Situ	-	-	-	-	-	-	-	The Christ Hospital,Jennifer Manders, MD,Cincinnati,Ohio,45219,United States,513-585-1496,
				-	-	-	-	-	-	-	-	Ohio State University Comprehensive Cancer Center,Lisa Yee, MD,Columbus,Ohio,43210,United States,614-293-6654,
				-	-	-	-	-	-	-	-	Greenville Health System Cancer Institute-Easley,Jeffrey Giguere, MD,Easley,South Carolina,29640,United States,864-241-6251,
				-	-	-	-	-	-	-	-	Greenville Health System Cancer Institute-Faris,Jeffrey Giguere, MD,Greenville,South Carolina,29605,United States,864-241-6251,
				-	-	-	-	-	-	-	-	Greenville Memorial Hospital,Jeffrey Giguere, MD,Greenville,South Carolina,29605,United States,864-241-6251,
				-	-	-	-	-	-	-	-	Greenville Health System Cancer Institute-Eastside,Jeffrey Giguere, MD,Greenville,South Carolina,29615,United States,864-241-6251,
				-	-	-	-	-	-	-	-	Greenville Health System Cancer Institute-Greer,Jeffrey Giguere, MD,Greer,South Carolina,29650,United States,864-241-6251,
				-	-	-	-	-	-	-	-	Greenville Health System Cancer Institute-Seneca,Jeffrey Giguere, MD,Seneca,South Carolina,29672,United States,864-241-6251,
				-	-	-	-	-	-	-	-	Greenville Health System Cancer Institute-Spartanburg,Jeffrey Giguere, MD,Spartanburg,South Carolina,29307,United States,864-241-6251,
				-	-	-	-	-	-	-	-	M D Anderson Cancer Center,Therese Bevers, MD,Houston,Texas,77030,United States,713-745-8048,
				-	-	-	-	-	-	-	-	Doctor's Hospital of Laredo,Gary Unzeitig, MD,Laredo,Texas,78045,United States,956-726-3691,
				-	-	-	-	-	-	-	-	University of Wisconsin Hospital and Clinics,Lee Wilke, MD,Madison,Wisconsin,53792,United States,608-265-5852,
BRCA2	NCT01905592	A Phase III Trial of Niraparib Versus Physician's Choice in HER2 Negative, Germline BRCA Mutation-positive Breast Cancer Patients	Phase 3	BRCA1 Gene Mutation	NIRAPARIB	DB00242	POLE,POLE2	CLADRIBINE	CLADRIBINE 10 MG/10 ML VIAL USD 34.2;LEUSTATIN 10 MG/10 ML VIAL USD 102.78	-	-	Tuscon,Arizona,United States,
				BRCA2 Gene Mutation	-	DB05149	CHEK1	XL844	-	-	-	Los Angeles,California,United States,
				Carcinoma of Breast	-	-	-	-	-	-	-	San Jose,California,United States,
				Human Epidermal Growth Factor 2 Negative Carcinoma of Breast	-	-	-	-	-	-	-	Fort Myers,Florida,United States,
				-	-	-	-	-	-	-	-	Miami,Florida,United States,
				-	-	-	-	-	-	-	-	Iowa City,Iowa,United States,
				-	-	-	-	-	-	-	-	Boston,Massachusetts,United States,
				-	-	-	-	-	-	-	-	Minneapolis,Minnesota,United States,
				-	-	-	-	-	-	-	-	Omaha,Nebraska,United States,
				-	-	-	-	-	-	-	-	Henderson,Nevada,United States,
				-	-	-	-	-	-	-	-	Morristown,New Jersey,United States,
				-	-	-	-	-	-	-	-	Lake Success,New York,United States,
				-	-	-	-	-	-	-	-	Latham,New York,United States,
				-	-	-	-	-	-	-	-	Eugene,Oregon,United States,
				-	-	-	-	-	-	-	-	Portland,Oregon,United States,
				-	-	-	-	-	-	-	-	Philadelphia,Pennsylvania,United States,
				-	-	-	-	-	-	-	-	Sioux Falls,South Dakota,United States,
				-	-	-	-	-	-	-	-	Nashville,Tennessee,United States,
				-	-	-	-	-	-	-	-	Dallas,Texas,United States,
				-	-	-	-	-	-	-	-	Fort Worth,Texas,76104,United States,
				-	-	-	-	-	-	-	-	Plano,Texas,75075,United States,
				-	-	-	-	-	-	-	-	San Antonio,Texas,United States,
				-	-	-	-	-	-	-	-	Webster,Texas,United States,
				-	-	-	-	-	-	-	-	Low Moor,Virginia,United States,
				-	-	-	-	-	-	-	-	Everett,Washington,United States,
				-	-	-	-	-	-	-	-	Seattle,Washington,United States,
				-	-	-	-	-	-	-	-	Milwaukee,Wisconsin,United States,
BRCA2	NCT01945775	A Study Evaluating Talazoparib (BMN 673), a PARP Inhibitor, in Advanced and/or Metastatic Breast Cancer Patients With BRCA Mutation (EMBRACA Study)	Phase 3	BRCA 1 Gene Mutation	TALAZOPARIB	DB00242	POLE,POLE2	CLADRIBINE	CLADRIBINE 10 MG/10 ML VIAL USD 34.2;LEUSTATIN 10 MG/10 ML VIAL USD 102.78	-	-	Scottsdale,Arizona,85258,United States,
				BRCA 2 Gene Mutation	-	DB05149	CHEK1	XL844	-	-	-	Sedona,Arizona,86336,United States,
				Breast Neoplasms	-	-	-	-	-	-	-	Fullerton,California,92835,United States,
				-	-	-	-	-	-	-	-	Greenbrae,California,94904,United States,
				-	-	-	-	-	-	-	-	Los Angeles,California,90017,United States,
				-	-	-	-	-	-	-	-	Palo Alto,California,94305,United States,
				-	-	-	-	-	-	-	-	Redondo Beach,California,90277,United States,
				-	-	-	-	-	-	-	-	San Francisco,California,94115,United States,
				-	-	-	-	-	-	-	-	San Luis Obispo,California,93401,United States,
				-	-	-	-	-	-	-	-	San Marcos,California,92078,United States,
				-	-	-	-	-	-	-	-	Santa Barbara,California,93105,United States,
				-	-	-	-	-	-	-	-	Santa Maria,California,93454,United States,
				-	-	-	-	-	-	-	-	Vallejo,California,94589,United States,
				-	-	-	-	-	-	-	-	Aurora,Colorado,80045,United States,
				-	-	-	-	-	-	-	-	Lakewood,Colorado,80228,United States,
				-	-	-	-	-	-	-	-	Southington,Connecticut,06489,United States,
				-	-	-	-	-	-	-	-	Deerfield Beach,Florida,33442,United States,
				-	-	-	-	-	-	-	-	Jacksonville,Florida,32256,United States,
				-	-	-	-	-	-	-	-	Orlando,Florida,32773,United States,
				-	-	-	-	-	-	-	-	Pembroke Pines,Florida,33028,United States,
				-	-	-	-	-	-	-	-	Plantation,Florida,33324,United States,
				-	-	-	-	-	-	-	-	St. Petersburg,Florida,33705,United States,
				-	-	-	-	-	-	-	-	Skokie,Illinois,60077,United States,
				-	-	-	-	-	-	-	-	Urbana,Illinois,61801,United States,
				-	-	-	-	-	-	-	-	Indianapolis,Indiana,46202,United States,
				-	-	-	-	-	-	-	-	Kansas City,Kansas,66160,United States,
				-	-	-	-	-	-	-	-	Bethesda,Maryland,20889,United States,
				-	-	-	-	-	-	-	-	Ann Arbor,Michigan,48109,United States,
				-	-	-	-	-	-	-	-	Grand Rapids,Michigan,49503,United States,
				-	-	-	-	-	-	-	-	Grand Rapids,Michigan,49506,United States,
				-	-	-	-	-	-	-	-	Royal Oaks,Michigan,48073,United States,
				-	-	-	-	-	-	-	-	Minneapolis,Minnesota,55404,United States,
				-	-	-	-	-	-	-	-	Woodbury,Minnesota,55125,United States,
				-	-	-	-	-	-	-	-	Las Vegas,Nevada,89169,United States,
				-	-	-	-	-	-	-	-	Albany,New York,12206,United States,
				-	-	-	-	-	-	-	-	New York,New York,10060,United States,
				-	-	-	-	-	-	-	-	Asheville,North Carolina,28806,United States,
				-	-	-	-	-	-	-	-	Portland,Oregon,97225,United States,
				-	-	-	-	-	-	-	-	Philadelphia,Pennsylvania,19124,United States,
				-	-	-	-	-	-	-	-	Pittsburgh,Pennsylvania,15213,United States,
				-	-	-	-	-	-	-	-	Germantown,Tennessee,38138,United States,
				-	-	-	-	-	-	-	-	Knoxville,Tennessee,37920,United States,
				-	-	-	-	-	-	-	-	Memphis,Tennessee,38120,United States,
				-	-	-	-	-	-	-	-	Nashville,Tennessee,37203,United States,
				-	-	-	-	-	-	-	-	Austin,Texas,78731,United States,
				-	-	-	-	-	-	-	-	Dallas,Texas,75231,United States,
				-	-	-	-	-	-	-	-	Dallas,Texas,75246,United States,
				-	-	-	-	-	-	-	-	El Paso,Texas,79902,United States,
				-	-	-	-	-	-	-	-	Fort Worth,Texas,76104,United States,
				-	-	-	-	-	-	-	-	Grandview,Texas,79902,United States,
				-	-	-	-	-	-	-	-	Houston,Texas,77024,United States,
				-	-	-	-	-	-	-	-	Houston,Texas,77030,United States,
				-	-	-	-	-	-	-	-	Houston,Texas,77090,United States,
				-	-	-	-	-	-	-	-	Plano,Texas,75075,United States,
				-	-	-	-	-	-	-	-	Round Rock,Texas,78681,United States,
				-	-	-	-	-	-	-	-	Fairfax,Virginia,22031,United States,
				-	-	-	-	-	-	-	-	Norfolk,Virginia,23502,United States,
				-	-	-	-	-	-	-	-	Seattle,Washington,98104,United States,
BRCA2	NCT02163694	A Phase 3 Randomized, Placebo-controlled Trial of Carboplatin and Paclitaxel With or Without Veliparib (ABT-888) in HER2-negative Metastatic or Locally Advanced Unresectable BRCA-associated Breast Cancer	Phase 3	Metastatic Breast Cancer	VELIPARIB	DB00242	POLE,POLE2	CLADRIBINE	CLADRIBINE 10 MG/10 ML VIAL USD 34.2;LEUSTATIN 10 MG/10 ML VIAL USD 102.78	-	-	Site Reference ID/Investigator# 125011,Site Reference ID/Investigator# 125011, DO,Gilbert,Arizona,85234,United States,
				-	CARBOPLATIN	DB05149	CHEK1	XL844	-	-	-	Site Reference ID/Investigator# 124992,Site Reference ID/Investigator# 124992, MD,Little Rock,Arkansas,72205,United States,
				-	PACLITAXEL	-	-	-	-	-	-	Site Reference ID/Investigator# 127117,Site Reference ID/Investigator# 127117, MD,Duarte,California,91010,United States,
				-	-	-	-	-	-	-	-	Site Reference ID/Investigator# 136078,Site Reference ID/Investigator# 136078, MD,Fresno,California,93720,United States,
				-	-	-	-	-	-	-	-	Site Reference ID/Investigator# 124991,Site Reference ID/Investigator# 124991, MD,La Jolla,California,92093-0698,United States,
				-	-	-	-	-	-	-	-	Site Reference ID/Investigator# 130058,Site Reference ID/Investigator# 130058, MD,Newport Beach,California,92663,United States,
				-	-	-	-	-	-	-	-	Site Reference ID/Investigator# 128860,Site Reference ID/Investigator# 128860, MD,Santa Ana,California,92705,United States,
				-	-	-	-	-	-	-	-	Site Reference ID/Investigator# 128520,Site Reference ID/Investigator# 128520, MD,Whittier,California,90603,United States,
				-	-	-	-	-	-	-	-	Site Reference ID/Investigator# 124983,Site Reference ID/Investigator# 124983, MD,Aurora,Colorado,80045,United States,
				-	-	-	-	-	-	-	-	Site Reference ID/Investigator# 131768,Site Reference ID/Investigator# 131768, MD,Denver,Colorado,80218,United States,
				-	-	-	-	-	-	-	-	Site Reference ID/Investigator# 133509,Site Reference ID/Investigator# 133509, MD,Norwalk,Connecticut,06856,United States,
				-	-	-	-	-	-	-	-	Site Reference ID/Investigator# 125013,Site Reference ID/Investigator# 125013, MD,Boca Raton,Florida,33486,United States,
				-	-	-	-	-	-	-	-	Site Reference ID/Investigator# 125012,Site Reference ID/Investigator# 125012, MD,Fort Lauderdale,Florida,33308,United States,
				-	-	-	-	-	-	-	-	Site Reference ID/Investigator# 128279,Site Reference ID/Investigator# 128279, MD,Pensacola,Florida,32504,United States,
				-	-	-	-	-	-	-	-	Site Reference ID/Investigator# 124990,Site Reference ID/Investigator# 124990, MD,Tampa,Florida,33612,United States,
				-	-	-	-	-	-	-	-	Site Reference ID/Investigator# 125007,Site Reference ID/Investigator# 125007, MD,West Palm Beach,Florida,33401,United States,
				-	-	-	-	-	-	-	-	Site Reference ID/Investigator# 133192,Site Reference ID/Investigator# 133192, MD,Atlanta,Georgia,30322,United States,
				-	-	-	-	-	-	-	-	Site Reference ID/Investigator# 125024,Site Reference ID/Investigator# 125024, MD,Decatur,Georgia,30033,United States,
				-	-	-	-	-	-	-	-	Site Reference ID/Investigator# 127576,Site Reference ID/Investigator# 127576, MD,Chicago,Illinois,60612,United States,
				-	-	-	-	-	-	-	-	Site Reference ID/Investigator# 124996,Site Reference ID/Investigator# 124996, MD,Evanston,Illinois,60201,United States,
				-	-	-	-	-	-	-	-	Site Reference ID/Investigator# 124986,Site Reference ID/Investigator# 124986, MD,Zion,Illinois,60099,United States,
				-	-	-	-	-	-	-	-	Site Reference ID/Investigator# 129904,Site Reference ID/Investigator# 129904, MD,Ames,Iowa,50010-3014,United States,
				-	-	-	-	-	-	-	-	Site Reference ID/Investigator# 125015,Site Reference ID/Investigator# 125015, MD,Baltimore,Maryland,21287-0013,United States,
				-	-	-	-	-	-	-	-	Site Reference ID/Investigator# 139461,Site Reference ID/Investigator# 139461, MD,Springfield,Massachusetts,01199,United States,
				-	-	-	-	-	-	-	-	Site Reference ID/Investigator# 129067,Site Reference ID/Investigator# 129067, MD,Worcester,Massachusetts,01655,United States,
				-	-	-	-	-	-	-	-	Site Reference ID/Investigator# 134497,Site Reference ID/Investigator# 134497, MD,Detroit,Michigan,48202,United States,
				-	-	-	-	-	-	-	-	Site Reference ID/Investigator# 133568,Site Reference ID/Investigator# 133568, MD,Grand Rapids,Michigan,49503,United States,
				-	-	-	-	-	-	-	-	Site Reference ID/Investigator# 125019,Site Reference ID/Investigator# 125019, MD,Royal Oak,Michigan,48073,United States,
				-	-	-	-	-	-	-	-	Site Reference ID/Investigator# 131352,Site Reference ID/Investigator# 131352, MD,Jackson,Mississippi,39213,United States,
				-	-	-	-	-	-	-	-	Site Reference ID/Investigator# 125023,Site Reference ID/Investigator# 125023, MD,Kansas City,Missouri,64111,United States,
				-	-	-	-	-	-	-	-	Site Reference ID/Investigator# 132711,Site Reference ID/Investigator# 132711, MD,Lincoln,Nebraska,68506,United States,
				-	-	-	-	-	-	-	-	Site Reference ID/Investigator# 125349,Site Reference ID/Investigator# 125349, MD,Albuquerque,New Mexico,87106,United States,
				-	-	-	-	-	-	-	-	Site Reference ID/Investigator# 136010,Site Reference ID/Investigator# 136010, MD,Albuquerque,New Mexico,87106,United States,
				-	-	-	-	-	-	-	-	Site Reference ID/Investigator# 125001,Site Reference ID/Investigator# 125001, MD,New York,New York,10011,United States,
				-	-	-	-	-	-	-	-	Site Reference ID/Investigator# 125003,Site Reference ID/Investigator# 125003, MD,New York,New York,10011,United States,
				-	-	-	-	-	-	-	-	Site Reference ID/Investigator# 134248,Site Reference ID/Investigator# 134248, MD,Asheville,North Carolina,28801,United States,
				-	-	-	-	-	-	-	-	Site Reference ID/Investigator# 124999,Site Reference ID/Investigator# 124999, MD,Durham,North Carolina,27701,United States,
				-	-	-	-	-	-	-	-	Site Reference ID/Investigator# 134849,Site Reference ID/Investigator# 134849, MD,Toledo,Ohio,43614,United States,
				-	-	-	-	-	-	-	-	Site Reference ID/Investigator# 134229,Site Reference ID/Investigator# 134229, MD,Portland,Oregon,97239,United States,
				-	-	-	-	-	-	-	-	Site Reference ID/Investigator# 130059,Site Reference ID/Investigator# 130059, MD,Allentown,Pennsylvania,18103,United States,
				-	-	-	-	-	-	-	-	Site Reference ID/Investigator# 124997,Site Reference ID/Investigator# 124997, MD,Hershey,Pennsylvania,17033,United States,
				-	-	-	-	-	-	-	-	Site Reference ID/Investigator# 135094,Site Reference ID/Investigator# 135094, MD,Pittsburgh,Pennsylvania,15212,United States,
				-	-	-	-	-	-	-	-	Site Reference ID/Investigator# 125005,Site Reference ID/Investigator# 125005, MD,Pittsburgh,Pennsylvania,15213,United States,
				-	-	-	-	-	-	-	-	Site Reference ID/Investigator# 137740,Site Reference ID/Investigator# 137740, MD,Arlington,Texas,76012,United States,
				-	-	-	-	-	-	-	-	Site Reference ID/Investigator# 124989,Site Reference ID/Investigator# 124989, MD,Dallas,Texas,75390-8852,United States,
				-	-	-	-	-	-	-	-	Site Reference ID/Investigator# 125353,Site Reference ID/Investigator# 125353, MD,Houston,Texas,77030,United States,
				-	-	-	-	-	-	-	-	Site Reference ID/Investigator# 125350,Site Reference ID/Investigator# 125350, MD,Burlington,Vermont,05401,United States,
				-	-	-	-	-	-	-	-	Site Reference ID/Investigator# 125021,Site Reference ID/Investigator# 125021, MD,Seattle,Washington,98104,United States,
				-	-	-	-	-	-	-	-	Site Reference ID/Investigator# 131534,Site Reference ID/Investigator# 131534, MD,Seattle,Washington,98104,United States,
				-	-	-	-	-	-	-	-	Site Reference ID/Investigator# 131548,Site Reference ID/Investigator# 131548, MD,Seattle,Washington,98104,United States,
				-	-	-	-	-	-	-	-	Site Reference ID/Investigator# 131549,Site Reference ID/Investigator# 131549, MD,Seattle,Washington,98104,United States,
				-	-	-	-	-	-	-	-	Site Reference ID/Investigator# 125344,Site Reference ID/Investigator# 125344, MD,Tacoma,Washington,98405,United States,
BRCA2	NCT02314156	Transdermal or Oral Telapristone Acetate in Treating Patients Undergoing Mastectomy	Phase 2	BRCA1 Mutation Carrier	TELAPRISTONE ACETATE	DB00242	POLE,POLE2	CLADRIBINE	CLADRIBINE 10 MG/10 ML VIAL USD 34.2;LEUSTATIN 10 MG/10 ML VIAL USD 102.78	-	-	Northwestern University,Seema A. Khan,Chicago,Illinois,60611,United States,skhan@nmh.org,312-503-2112,
				BRCA2 Mutation Carrier	-	DB05149	CHEK1	XL844	-	-	-	Memorial Sloan-Kettering Cancer Center,Melissa L. Pilewskie,New York,New York,10065,United States,pilewskm@mskcc.org,646-888-4590,
				Ductal Breast Carcinoma In Situ	-	-	-	-	-	-	-	-
				Lobular Breast Carcinoma In Situ	-	-	-	-	-	-	-	-
				Stage 0 Breast Cancer	-	-	-	-	-	-	-	-
				Stage IA Breast Cancer	-	-	-	-	-	-	-	-
				Stage IB Breast Cancer	-	-	-	-	-	-	-	-
				Stage IIA Breast Cancer	-	-	-	-	-	-	-	-
				Stage IIB Breast Cancer	-	-	-	-	-	-	-	-
BRCA2	NCT02393794	Romidepsin Plus Cisplatin in Locally Recurrent or Metastatic Triple Negative Breast Cancer (TNBC)	Phase 1/Phase 2	Breast Cancer	CISPLATIN	DB00242	POLE,POLE2	CLADRIBINE	CLADRIBINE 10 MG/10 ML VIAL USD 34.2;LEUSTATIN 10 MG/10 ML VIAL USD 102.78	-	-	University of Kansas Cancer Center - Clinical Research Center,Kerry Hepler,Fairway,Kansas,66205,United States,khepler@kumc.edu,913-945-7552,
				Triple-Negative Breast Cancer	ROMIDEPSIN	DB05149	CHEK1	XL844	-	-	-	-
BRCA2	NCT02401347	Talazoparib Beyond BRCA (TBB) Trial	Phase 2	Advanced Breast Cancer	TALAZOPARIB TOSYLATE	DB00242	POLE,POLE2	CLADRIBINE	CLADRIBINE 10 MG/10 ML VIAL USD 34.2;LEUSTATIN 10 MG/10 ML VIAL USD 102.78	-	-	Stanford University Hospitals and Clinics,Melinda L. Telli, M.D.,Stanford,California,94305,United States,peijenc@stanford.edu,650-725-0866,
				HER2/Neu Negative	-	DB05149	CHEK1	XL844	-	-	-	-
				Triple-Negative Breast Cancer	-	-	-	-	-	-	-	-
PTEN	NCT01226316	Safety, Tolerability & Potential Anti-cancer Activity of Increasing Doses of AZD5363 in Different Treatment Schedules	Phase 1	AKT1	AZD5363	DB00398	PDGFRB	SORAFENIB	NEXAVAR 200 MG TABLET USD 66.61	-	-	Research Site,Los Angeles,California,United States,
				Advanced Solid Malignancy	-	DB00570	JUN	VINBLASTINE	VINBLASTINE SULF 10 MG VIAL USD 18.6	-	-	Research Site,Stanford,California,United States,
				Advanced or Metastatic Breast Cancer	-	DB00619	PDGFRB	IMATINIB	GLEEVEC 100 MG TABLET USD 41.69;GLEEVEC 400 MG TABLET USD 174.38	-	-	Research Site,Aurora,Colorado,United States,
				Cervical Cancer	-	DB01169	JUN	ARSENIC TRIOXIDE	ARSENIC TRIOXIDE POWDER USD 2.59;TRISENOX 10 MG/10 ML AMPULE USD 43.58	-	-	Research Site,New Haven,Connecticut,United States,
				ER+	-	DB01254	PDGFRB	DASATINIB	SPRYCEL 20 MG TABLET USD 69.56;SPRYCEL 50 MG TABLET USD 139.12;SPRYCEL 70 MG TABLET USD 139.12;SPRYCEL 100 MG TABLET USD 278.24	-	-	Research Site,New York,New York,United States,
				Endometrial Cancer	-	DB01268	PDGFRB	SUNITINIB	SUTENT 12.5 MG CAPSULE USD 93.64;SUTENT 25 MG CAPSULE USD 187.28;SUTENT 50 MG CAPSULE USD 333.39	-	-	Research Site,Oklahoma City,Oklahoma,United States,
				HER2+	-	DB05014	PDGFRB	XL999	-	-	-	Research Site,Charleston,South Carolina,United States,
				Ovarian Cancer	-	DB05146	PDGFRB	XL820	-	-	-	Research Site,Nashville,Tennessee,United States,
				PIK3CA	-	DB05785	JUN	LGD-1550	-	-	-	Research Site,Houston,Texas,United States,
				PTEN	-	DB06589	PDGFRB	PAZOPANIB	-	-	-	-
				Pharmacodynamics	-	DB08896	PDGFRB	REGORAFENIB	-	-	-	-
				Pharmacokinetics	-	-	-	-	-	-	-	-
				Safety and Tolerability	-	-	-	-	-	-	-	-
				Tumour Response	-	-	-	-	-	-	-	-
PTEN	NCT01633060	A Phase III Study of BKM120 With Fulvestrant in Patients With HR+,HER2-, AI Treated, Locally Advanced or Metastatic Breast Cancer Who Progressed on or After mTORi	Phase 3	Metastatic Breast Cancer HR+, HER2-	BKM120	DB00398	PDGFRB	SORAFENIB	NEXAVAR 200 MG TABLET USD 66.61	-	-	University Cancer & Blood Center, LLC,Petros Nikolinakos,Athens,Georgia,30607,United States,jhodgson@universitycancer.com,706-353-2990,
				-	FULVESTRANT	DB00570	JUN	VINBLASTINE	VINBLASTINE SULF 10 MG VIAL USD 18.6	-	-	Northwest Medical Specialties,Sibel Blau,Tacoma,Washington,98405,United States,pwalsh@nwmsonline.com,253-396-5329,
				-	-	DB00619	PDGFRB	IMATINIB	GLEEVEC 100 MG TABLET USD 41.69;GLEEVEC 400 MG TABLET USD 174.38	-	-	-
				-	-	DB01169	JUN	ARSENIC TRIOXIDE	ARSENIC TRIOXIDE POWDER USD 2.59;TRISENOX 10 MG/10 ML AMPULE USD 43.58	-	-	-
				-	-	DB01254	PDGFRB	DASATINIB	SPRYCEL 20 MG TABLET USD 69.56;SPRYCEL 50 MG TABLET USD 139.12;SPRYCEL 70 MG TABLET USD 139.12;SPRYCEL 100 MG TABLET USD 278.24	-	-	-
				-	-	DB01268	PDGFRB	SUNITINIB	SUTENT 12.5 MG CAPSULE USD 93.64;SUTENT 25 MG CAPSULE USD 187.28;SUTENT 50 MG CAPSULE USD 333.39	-	-	-
				-	-	DB05014	PDGFRB	XL999	-	-	-	-
				-	-	DB05146	PDGFRB	XL820	-	-	-	-
				-	-	DB05785	JUN	LGD-1550	-	-	-	-
				-	-	DB06589	PDGFRB	PAZOPANIB	-	-	-	-
				-	-	DB08896	PDGFRB	REGORAFENIB	-	-	-	-
PTEN	NCT01884285	AZD8186 First Time In Patient Ascending Dose Study	Phase 1	Advanced Castrate-resistant Prostate Cancer (CRPC);	PART D1: AZD2014 COMBINATION WITH AZD8186	DB00398	PDGFRB	SORAFENIB	NEXAVAR 200 MG TABLET USD 66.61	-	-	Research Site,Boston,Massachusetts,United States,
				Squamous Non-Small Cell Lung Cancer (sqNSCLC);	PART B: AZD8186 MONOTHERAPY	DB00570	JUN	VINBLASTINE	VINBLASTINE SULF 10 MG VIAL USD 18.6	-	-	Research Site,Detroit,Michigan,United States,
				Triple Negative Breast Cancer (TNBC)	PART C: ABIRATERONE ACETATE IN COMBINATION WITH AZD8186	DB00619	PDGFRB	IMATINIB	GLEEVEC 100 MG TABLET USD 41.69;GLEEVEC 400 MG TABLET USD 174.38	-	-	Research Site,Seattle,Washington,United States,
				-	PART D2 AZD2014 COMBINATION WITH AZD8186	DB01169	JUN	ARSENIC TRIOXIDE	ARSENIC TRIOXIDE POWDER USD 2.59;TRISENOX 10 MG/10 ML AMPULE USD 43.58	-	-	Research Site,Madison,Wisconsin,United States,
				-	AZD8186 MONOTHERAPY	DB01254	PDGFRB	DASATINIB	SPRYCEL 20 MG TABLET USD 69.56;SPRYCEL 50 MG TABLET USD 139.12;SPRYCEL 70 MG TABLET USD 139.12;SPRYCEL 100 MG TABLET USD 278.24	-	-	-
				-	-	DB01268	PDGFRB	SUNITINIB	SUTENT 12.5 MG CAPSULE USD 93.64;SUTENT 25 MG CAPSULE USD 187.28;SUTENT 50 MG CAPSULE USD 333.39	-	-	-
				-	-	DB05014	PDGFRB	XL999	-	-	-	-
				-	-	DB05146	PDGFRB	XL820	-	-	-	-
				-	-	DB05785	JUN	LGD-1550	-	-	-	-
				-	-	DB06589	PDGFRB	PAZOPANIB	-	-	-	-
				-	-	DB08896	PDGFRB	REGORAFENIB	-	-	-	-
PTEN	NCT01989546	Pilot Trial of BMN 673, an Oral PARP Inhibitor, in Patients With Advanced Solid Tumors and Deleterious BRCA Mutations	Phase 1/Phase 2	Advanced Breast Cancer	BMN 673	DB00398	PDGFRB	SORAFENIB	NEXAVAR 200 MG TABLET USD 66.61	-	-	National Institutes of Health Clinical Center, 9000 Rockville Pike,For more information at the NIH Clinical Center contact National Cancer Institute Referral Office,Bethesda,Maryland,20892,United States,888-624-1937,
				Advanced Ovarian Cancer	-	DB00570	JUN	VINBLASTINE	VINBLASTINE SULF 10 MG VIAL USD 18.6	-	-	-
				Advanced Solid Tumors	-	DB00619	PDGFRB	IMATINIB	GLEEVEC 100 MG TABLET USD 41.69;GLEEVEC 400 MG TABLET USD 174.38	-	-	-
				Primary Peritoneal Cancer	-	DB01169	JUN	ARSENIC TRIOXIDE	ARSENIC TRIOXIDE POWDER USD 2.59;TRISENOX 10 MG/10 ML AMPULE USD 43.58	-	-	-
				-	-	DB01254	PDGFRB	DASATINIB	SPRYCEL 20 MG TABLET USD 69.56;SPRYCEL 50 MG TABLET USD 139.12;SPRYCEL 70 MG TABLET USD 139.12;SPRYCEL 100 MG TABLET USD 278.24	-	-	-
				-	-	DB01268	PDGFRB	SUNITINIB	SUTENT 12.5 MG CAPSULE USD 93.64;SUTENT 25 MG CAPSULE USD 187.28;SUTENT 50 MG CAPSULE USD 333.39	-	-	-
				-	-	DB05014	PDGFRB	XL999	-	-	-	-
				-	-	DB05146	PDGFRB	XL820	-	-	-	-
				-	-	DB05785	JUN	LGD-1550	-	-	-	-
				-	-	DB06589	PDGFRB	PAZOPANIB	-	-	-	-
				-	-	DB08896	PDGFRB	REGORAFENIB	-	-	-	-
PTEN	NCT02401347	Talazoparib Beyond BRCA (TBB) Trial	Phase 2	Advanced Breast Cancer	TALAZOPARIB TOSYLATE	DB00398	PDGFRB	SORAFENIB	NEXAVAR 200 MG TABLET USD 66.61	-	-	Stanford University Hospitals and Clinics,Melinda L. Telli, M.D.,Stanford,California,94305,United States,peijenc@stanford.edu,650-725-0866,
				HER2/Neu Negative	-	DB00570	JUN	VINBLASTINE	VINBLASTINE SULF 10 MG VIAL USD 18.6	-	-	-
				Triple-Negative Breast Cancer	-	DB00619	PDGFRB	IMATINIB	GLEEVEC 100 MG TABLET USD 41.69;GLEEVEC 400 MG TABLET USD 174.38	-	-	-
				-	-	DB01169	JUN	ARSENIC TRIOXIDE	ARSENIC TRIOXIDE POWDER USD 2.59;TRISENOX 10 MG/10 ML AMPULE USD 43.58	-	-	-
				-	-	DB01254	PDGFRB	DASATINIB	SPRYCEL 20 MG TABLET USD 69.56;SPRYCEL 50 MG TABLET USD 139.12;SPRYCEL 70 MG TABLET USD 139.12;SPRYCEL 100 MG TABLET USD 278.24	-	-	-
				-	-	DB01268	PDGFRB	SUNITINIB	SUTENT 12.5 MG CAPSULE USD 93.64;SUTENT 25 MG CAPSULE USD 187.28;SUTENT 50 MG CAPSULE USD 333.39	-	-	-
				-	-	DB05014	PDGFRB	XL999	-	-	-	-
				-	-	DB05146	PDGFRB	XL820	-	-	-	-
				-	-	DB05785	JUN	LGD-1550	-	-	-	-
				-	-	DB06589	PDGFRB	PAZOPANIB	-	-	-	-
				-	-	DB08896	PDGFRB	REGORAFENIB	-	-	-	-
CDH1	NCT02659631	PF-06671008 Dose Escalation Study in Advanced Solid Tumors	Phase 1	Neoplasms	PF-06671008	DB00002	EGFR	CETUXIMAB	-	FCGR2A Low affinity immunoglobulin gamma Fc region receptor II-a rs1801274 None H allelle Increased progression free survival;FCGR3A Low affinity immunoglobulin gamma Fc region receptor III-A rs396991 None A > C Better response to drug therapy (longer progression free survival) with the F allele;	-	The University of Texas - M.D. Anderson Cancer Center (Drug Shipment Address),Houston,Texas,77030,United States,
				-	-	DB00072	EGFR	TRASTUZUMAB	HERCEPTIN 440 MG VIAL USD 3443.46;HERCEPTIN 440 MG SOLUTION VIAL USD 3581.2	FGFR4 Fibroblast growth factor receptor 4 rs351855 None C Allele Reduced response to herceptin;	ERBB2 Receptor tyrosine-protein kinase erbB-2 rs1801200 None Cardiotoxicity;	The University of Texas - M.D. Anderson Cancer Center,Houston,Texas,77030,United States,
				-	-	DB00317	EGFR	GEFITINIB	TARCEVA 25 MG TABLET USD 52.78;IRESSA 250 MG TABLET USD 68.08;TARCEVA 100 MG TABLET USD 144.98;TARCEVA 150 MG TABLET USD 163.98	EGFR Epidermal growth factor receptor None G719A/C OR (L858R and L861Q) None Associated with enhanced activation of the EGFR tyrosine kinase in patients with non-small cell lung cancer (NSCLC) recieving tyrosine kinase inhibitor therapy.;	ABCG2 ATP-binding cassette sub-family G member 2 rs2231142 None Diarrhea;ABCG2 ATP-binding cassette sub-family G member 2 rs2231142 None In non-small lung cancer patients, those that are heterozygous (ABCG2 421C>A) have a higher risk of diarrhea.;	Huntsman Cancer Hospital: Drug Shipment Address,Salt Lake City,Utah,84112,United States,
				-	-	DB00398	RET	SORAFENIB	NEXAVAR 200 MG TABLET USD 66.61	-	-	Huntsman Cancer Institute,Salt Lake City,Utah,84112,United States,
				-	-	DB00530	EGFR	ERLOTINIB	TARCEVA 25 MG TABLET USD 52.78;TARCEVA 100 MG TABLET USD 144.98;TARCEVA 150 MG TABLET USD 163.98	EGFR Epidermal growth factor receptor None G719A/C OR (L858R and L861Q) None Associated with enhanced activation of the EGFR tyrosine kinase in patients with non-small cell lung cancer (NSCLC) recieving tyrosine kinase inhibitor therapy.;	-	-
				-	-	DB00619	RET	IMATINIB	GLEEVEC 100 MG TABLET USD 41.69;GLEEVEC 400 MG TABLET USD 174.38	-	-	-
				-	-	DB00786	MMP3,MMP7,MMP9	MARIMASTAT	-	-	-	-
				-	-	DB01119	CA2	DIAZOXIDE	PROGLYCEM 100 MG CAPSULE USD 1.65;DIAZOXIDE POWDER USD 85.07;PROGLYCEM 50 MG/ML SUSPENSION 30ML BOTTLE USD 197.05	-	-	-
				-	-	DB01254	FYN,SRC	DASATINIB	SPRYCEL 20 MG TABLET USD 69.56;SPRYCEL 50 MG TABLET USD 139.12;SPRYCEL 70 MG TABLET USD 139.12;SPRYCEL 100 MG TABLET USD 278.24	-	-	-
				-	-	DB01259	EGFR	LAPATINIB	TYKERB 250 MG TABLET USD 28.4	-	-	-
				-	-	DB01269	EGFR	PANITUMUMAB	VECTIBIX 100 MG/5 ML VIAL USD 203.7;VECTIBIX 200 MG/10 ML VIAL USD 203.7;VECTIBIX 400 MG/20 ML VIAL USD 203.7;VECTIBIX 100 MG/5ML SOLUTION 5ML VIAL USD 1059.24;VECTIBIX 400 MG/20ML SOLUTION 20ML VIAL USD 4349.4	-	-	-
				-	-	DB03496	EGFR	FLAVOPIRIDOL	-	-	-	-
				-	-	DB04988	EGFR	IGN311	-	-	-	-
				-	-	DB05007	EGF	XL647	-	-	-	-
				-	-	DB05014	RET	XL999	-	-	-	-
				-	-	DB05101	EGFR	MATUZUMAB	-	-	-	-
				-	-	DB05153	MET	XL184	-	-	-	-
				-	-	DB05184	SRC	XL228	-	-	-	-
				-	-	DB05216	MET,RET	MP470	-	-	-	-
				-	-	DB05324	EGFR	HUMAX-EGFR	-	-	-	-
				-	-	DB05374	EGFR	CDX-110	-	-	-	-
				-	-	DB05387	MMP9	AE-941	-	-	-	-
				-	-	DB05424	EGFR	CI-1033	-	-	-	-
				-	-	DB05774	EGFR	IMC-11F8	-	-	-	-
				-	-	DB05900	EGFR	INSM-18	-	-	-	-
				-	-	DB06616	SRC	BOSUTINIB	-	-	-	-
				-	-	DB08846	CA2	ELLAGIC ACID	-	-	-	-
				-	-	DB08865	MET	CRIZOTINIB	-	-	-	-
				-	-	DB08875	MET,RET	CABOZANTINIB	-	-	-	-
				-	-	DB08896	RET	REGORAFENIB	-	-	-	-
				-	-	DB08901	RET,SRC	PONATINIB	-	-	-	-
				-	-	DB08916	EGFR	AFATINIB	-	EGFR Epidermal growth factor receptor None G719A/C OR (L858R and L861Q) None Associated with enhanced activation of the EGFR tyrosine kinase in patients with non-small cell lung cancer (NSCLC) recieving tyrosine kinase inhibitor therapy.;	-	-
				-	-	DB09330	EGFR	OSIMERTINIB	-	-	-	-
				-	-	DB09559	EGFR	NECITUMUMAB	-	-	-	-
PALB2	NCT02401347	Talazoparib Beyond BRCA (TBB) Trial	Phase 2	Advanced Breast Cancer	TALAZOPARIB TOSYLATE	DB00242	POLE,POLE2	CLADRIBINE	CLADRIBINE 10 MG/10 ML VIAL USD 34.2;LEUSTATIN 10 MG/10 ML VIAL USD 102.78	-	-	Stanford University Hospitals and Clinics,Melinda L. Telli, M.D.,Stanford,California,94305,United States,peijenc@stanford.edu,650-725-0866,
				HER2/Neu Negative	-	-	-	-	-	-	-	-
				Triple-Negative Breast Cancer	-	-	-	-	-	-	-	-
CHEK2	NCT02401347	Talazoparib Beyond BRCA (TBB) Trial	Phase 2	Advanced Breast Cancer	TALAZOPARIB TOSYLATE	DB05149	CHEK2	XL844	-	-	-	Stanford University Hospitals and Clinics,Melinda L. Telli, M.D.,Stanford,California,94305,United States,peijenc@stanford.edu,650-725-0866,
				HER2/Neu Negative	-	-	-	-	-	-	-	-
				Triple-Negative Breast Cancer	-	-	-	-	-	-	-	-
ATM	NCT01989546	Pilot Trial of BMN 673, an Oral PARP Inhibitor, in Patients With Advanced Solid Tumors and Deleterious BRCA Mutations	Phase 1/Phase 2	Advanced Breast Cancer	BMN 673	DB00242	POLE,POLE2	CLADRIBINE	CLADRIBINE 10 MG/10 ML VIAL USD 34.2;LEUSTATIN 10 MG/10 ML VIAL USD 102.78	-	-	National Institutes of Health Clinical Center, 9000 Rockville Pike,For more information at the NIH Clinical Center contact National Cancer Institute Referral Office,Bethesda,Maryland,20892,United States,888-624-1937,
				Advanced Ovarian Cancer	-	DB03496	CDK9,CDK7	FLAVOPIRIDOL	-	-	-	-
				Advanced Solid Tumors	-	DB05149	CHEK1,CHEK2	XL844	-	-	-	-
				Primary Peritoneal Cancer	-	-	-	-	-	-	-	-
ATM	NCT02401347	Talazoparib Beyond BRCA (TBB) Trial	Phase 2	Advanced Breast Cancer	TALAZOPARIB TOSYLATE	DB00242	POLE,POLE2	CLADRIBINE	CLADRIBINE 10 MG/10 ML VIAL USD 34.2;LEUSTATIN 10 MG/10 ML VIAL USD 102.78	-	-	Stanford University Hospitals and Clinics,Melinda L. Telli, M.D.,Stanford,California,94305,United States,peijenc@stanford.edu,650-725-0866,
				HER2/Neu Negative	-	DB03496	CDK9,CDK7	FLAVOPIRIDOL	-	-	-	-
				Triple-Negative Breast Cancer	-	DB05149	CHEK1,CHEK2	XL844	-	-	-	-
NBN	NCT02401347	Talazoparib Beyond BRCA (TBB) Trial	Phase 2	Advanced Breast Cancer	TALAZOPARIB TOSYLATE	DB00242	POLE,POLE2	CLADRIBINE	CLADRIBINE 10 MG/10 ML VIAL USD 34.2;LEUSTATIN 10 MG/10 ML VIAL USD 102.78	-	-	Stanford University Hospitals and Clinics,Melinda L. Telli, M.D.,Stanford,California,94305,United States,peijenc@stanford.edu,650-725-0866,
				HER2/Neu Negative	-	DB00290	LIG3	BLEOMYCIN	BLEOMYCIN SULFATE 15 UNIT VIAL USD 81.6;BLEOMYCIN SULFATE 30 UNIT VIAL USD 120.0;BLENOXANE 15 UNIT VIAL USD 292.42;BLENOXANE 30 UNIT VIAL USD 584.83	BLMH Bleomycin hydrolase rs10500565 None A Allele Improved response to bleomycin;BLMH Bleomycin hydrolase rs10500565 None G Allele Reduced response to bleomycin, higher prevalence of relapse;	-	-
				Triple-Negative Breast Cancer	-	DB03496	CDK2	FLAVOPIRIDOL	-	-	-	-
				-	-	DB05037	CDK2	AT7519	-	-	-	-
				-	-	DB05149	CHEK1,CHEK2	XL844	-	-	-	-
				-	-	DB06616	CDK2	BOSUTINIB	-	-	-	-
BARD1	NCT02401347	Talazoparib Beyond BRCA (TBB) Trial	Phase 2	Advanced Breast Cancer	TALAZOPARIB TOSYLATE	DB00242	POLE,POLE2	CLADRIBINE	CLADRIBINE 10 MG/10 ML VIAL USD 34.2;LEUSTATIN 10 MG/10 ML VIAL USD 102.78	-	-	Stanford University Hospitals and Clinics,Melinda L. Telli, M.D.,Stanford,California,94305,United States,peijenc@stanford.edu,650-725-0866,
				HER2/Neu Negative	-	DB03496	CDK2	FLAVOPIRIDOL	-	-	-	-
				Triple-Negative Breast Cancer	-	DB05037	CDK2	AT7519	-	-	-	-
				-	-	DB05149	CHEK2	XL844	-	-	-	-
				-	-	DB06616	CDK2	BOSUTINIB	-	-	-	-
BRIP1	NCT02401347	Talazoparib Beyond BRCA (TBB) Trial	Phase 2	Advanced Breast Cancer	TALAZOPARIB TOSYLATE	DB00242	POLE,POLE2	CLADRIBINE	CLADRIBINE 10 MG/10 ML VIAL USD 34.2;LEUSTATIN 10 MG/10 ML VIAL USD 102.78	-	-	Stanford University Hospitals and Clinics,Melinda L. Telli, M.D.,Stanford,California,94305,United States,peijenc@stanford.edu,650-725-0866,
				HER2/Neu Negative	-	-	-	-	-	-	-	-
				Triple-Negative Breast Cancer	-	-	-	-	-	-	-	-

## Sheet: Table S7
Table S7. Ovarian Cancer Drug Panel Summary
Gene	Trial ID	Trial Description	Conditions	Drug Intervention	Number of DrugBank Entries	Number of Locations
BRCA1	NCT01482715	A Study of Oral Rucaparib in Patients With a Solid Tumor (Phase I) or With gBRCA Mutation Ovarian Cancer (Phase II)	Advanced Solid Tumor With Evidence of Germline or Somatic BRCA	Rucaparib	8	1
			Fallopian Tube Cancer
			Ovarian Cancer
			Peritoneal Cancer
BRCA1	NCT01989546	Pilot Trial of BMN 673, an Oral PARP Inhibitor, in Patients With Advanced Solid Tumors and Deleterious BRCA Mutations	Advanced Breast Cancer	BMN 673	8	1
			Advanced Ovarian Cancer
			Advanced Solid Tumors
			Primary Peritoneal Cancer
BRCA1	NCT02203513	A Phase II Single Arm Pilot Study of the Chk1/2 Inhibitor (LY2606368) in BRCA1/2 Mutation Associated Breast or Ovarian Cancer, Triple Negative Breast Cancer, High Grade Serous Ovarian Cancer, and Metastatic Castrate-Resistant Prostate Cancer	Breast Cancer	LY2606368	8	1
			Ovarian Cancer
			mCRPC
BRCA1	NCT02282020	Olaparib Treatment in Relapsed Germline Breast Cancer Susceptibility Gene (BRCA) Mutated Ovarian Cancer Patients Who Have Progressed at Least 6 Months After Last Platinum Treatment and Have Received at Least 2 Prior Platinum Treatments	Relapsed Ovarian Cancer, BRCA Mutation, Platinum Sensitivity	OLAPARIB	8	28
				Single agent chemotherapy
BRCA1	NCT02345265	Olaparib and Cediranib Maleate in Treating Patients With Recurrent Ovarian, Primary Peritoneal, or Fallopian Tube Cancer	BRCA1 Gene Mutation	Cediranib Maleate	8	8
			BRCA2 Gene Mutation	Olaparib
			Fallopian Tube Endometrioid Adenocarcinoma
			Fallopian Tube Serous Adenocarcinoma
			High Grade Ovarian Serous Adenocarcinoma
			Ovarian Endometrioid Tumor
			Primary Peritoneal Serous Adenocarcinoma
			Recurrent Fallopian Tube Carcinoma
			Recurrent Ovarian Carcinoma
			Recurrent Primary Peritoneal Carcinoma
BRCA1	NCT02482311	Safety, Tolerance, PK, and Anti-tumour Activity of AZD1775 Monotherapy in Patients With Advanced Solid Tumours	Ovarian Cancer, TNBC, SCLC, Other Solid Tumours	AZD 1775	8	6
BRCA1	NCT02571725	PARP-inhibition and CTLA-4 Blockade in BRCA-deficient Ovarian Cancer	Fallopian Tube Cancer	Olaparib	8	1
			Ovarian Cancer	Tremelimumab
			Peritoneal Neoplasms
BRCA2	NCT01482715	A Study of Oral Rucaparib in Patients With a Solid Tumor (Phase I) or With gBRCA Mutation Ovarian Cancer (Phase II)	Advanced Solid Tumor With Evidence of Germline or Somatic BRCA	Rucaparib	2	1
			Fallopian Tube Cancer
			Ovarian Cancer
			Peritoneal Cancer
BRCA2	NCT02345265	Olaparib and Cediranib Maleate in Treating Patients With Recurrent Ovarian, Primary Peritoneal, or Fallopian Tube Cancer	BRCA1 Gene Mutation	Cediranib Maleate	2	8
			BRCA2 Gene Mutation	Olaparib
			Fallopian Tube Endometrioid Adenocarcinoma
			Fallopian Tube Serous Adenocarcinoma
			High Grade Ovarian Serous Adenocarcinoma
			Ovarian Endometrioid Tumor
			Primary Peritoneal Serous Adenocarcinoma
			Recurrent Fallopian Tube Carcinoma
			Recurrent Ovarian Carcinoma
			Recurrent Primary Peritoneal Carcinoma
BRCA2	NCT02571725	PARP-inhibition and CTLA-4 Blockade in BRCA-deficient Ovarian Cancer	Fallopian Tube Cancer	Olaparib	2	1
			Ovarian Cancer	Tremelimumab
			Peritoneal Neoplasms
TP53	NCT02101775	Gemcitabine Hydrochloride With or Without WEE1 Inhibitor MK-1775 in Treating Patients With Recurrent Ovarian, Primary Peritoneal, or Fallopian Tube Cancer	Ovarian Brenner Tumor	Gemcitabine Hydrochloride	33	14
			Ovarian Carcinosarcoma	WEE1 Inhibitor AZD1775
			Ovarian Clear Cell Cystadenocarcinoma
			Ovarian Endometrioid Adenocarcinoma
			Ovarian Mucinous Cystadenocarcinoma
			Ovarian Seromucinous Carcinoma
			Ovarian Serous Cystadenocarcinoma
			Ovarian Serous Surface Papillary Adenocarcinoma
			Recurrent Fallopian Tube Carcinoma
			Recurrent Ovarian Carcinoma
			Recurrent Primary Peritoneal Carcinoma
			Undifferentiated Ovarian Carcinoma
TP53	NCT02275039	p53MVA Vaccine and Gemcitabine Hydrochloride in Treating Patients With Recurrent Ovarian Epithelial Cancer	Recurrent Fallopian Tube Carcinoma	gemcitabine hydrochloride	33	1
			Recurrent Ovarian Epithelial Cancer
			Recurrent Primary Peritoneal Carcinoma

## Sheet: Table S8
Table S8. Ovarian Cancer Drug Panel Report
Gene	Trial ID	Trial Description	Phase	Conditions	Drug Intervention	DrugBank ID	Target	Name	Prices	SNP effects	SNP adverse	Locations
BRCA1	NCT01482715	A Study of Oral Rucaparib in Patients With a Solid Tumor (Phase I) or With gBRCA Mutation Ovarian Cancer (Phase II)	Phase 1/Phase 2	Advanced Solid Tumor With Evidence of Germline or Somatic BRCA	RUCAPARIB	DB00242	POLE,POLE2	CLADRIBINE	CLADRIBINE 10 MG/10 ML VIAL USD 34.2;LEUSTATIN 10 MG/10 ML VIAL USD 102.78	-	-	Sarah Cannon Research Institute,Lorie Patterson,Nashville,Tennessee,37203,United States,lorie.patterson@scresearch.net,
				Fallopian Tube Cancer	-	DB03496	CDK2,CDK9,CDK7	FLAVOPIRIDOL	-	-	-	-
				Ovarian Cancer	-	DB05037	CDK2	AT7519	-	-	-	-
				Peritoneal Cancer	-	DB05149	CHEK1,CHEK2	XL844	-	-	-	-
				-	-	DB05169	AURKA	AT9283	-	-	-	-
				-	-	DB05198	AURKA	CYC116	-	-	-	-
				-	-	DB05220	AURKA	MLN8237	-	-	-	-
				-	-	DB06616	CDK2	BOSUTINIB	-	-	-	-
BRCA1	NCT01989546	Pilot Trial of BMN 673, an Oral PARP Inhibitor, in Patients With Advanced Solid Tumors and Deleterious BRCA Mutations	Phase 1/Phase 2	Advanced Breast Cancer	BMN 673	DB00242	POLE,POLE2	CLADRIBINE	CLADRIBINE 10 MG/10 ML VIAL USD 34.2;LEUSTATIN 10 MG/10 ML VIAL USD 102.78	-	-	National Institutes of Health Clinical Center, 9000 Rockville Pike,For more information at the NIH Clinical Center contact National Cancer Institute Referral Office,Bethesda,Maryland,20892,United States,888-624-1937,
				Advanced Ovarian Cancer	-	DB03496	CDK2,CDK9,CDK7	FLAVOPIRIDOL	-	-	-	-
				Advanced Solid Tumors	-	DB05037	CDK2	AT7519	-	-	-	-
				Primary Peritoneal Cancer	-	DB05149	CHEK1,CHEK2	XL844	-	-	-	-
				-	-	DB05169	AURKA	AT9283	-	-	-	-
				-	-	DB05198	AURKA	CYC116	-	-	-	-
				-	-	DB05220	AURKA	MLN8237	-	-	-	-
				-	-	DB06616	CDK2	BOSUTINIB	-	-	-	-
BRCA1	NCT02203513	A Phase II Single Arm Pilot Study of the Chk1/2 Inhibitor (LY2606368) in BRCA1/2 Mutation Associated Breast or Ovarian Cancer, Triple Negative Breast Cancer, High Grade Serous Ovarian Cancer, and Metastatic Castrate-Resistant Prostate Cancer	Phase 2	Breast Cancer	LY2606368	DB00242	POLE,POLE2	CLADRIBINE	CLADRIBINE 10 MG/10 ML VIAL USD 34.2;LEUSTATIN 10 MG/10 ML VIAL USD 102.78	-	-	National Institutes of Health Clinical Center, 9000 Rockville Pike,For more information at the NIH Clinical Center contact National Cancer Institute Referral Office,Bethesda,Maryland,20892,United States,888-624-1937,
				Ovarian Cancer	-	DB03496	CDK2,CDK9,CDK7	FLAVOPIRIDOL	-	-	-	-
				mCRPC	-	DB05037	CDK2	AT7519	-	-	-	-
				-	-	DB05149	CHEK1,CHEK2	XL844	-	-	-	-
				-	-	DB05169	AURKA	AT9283	-	-	-	-
				-	-	DB05198	AURKA	CYC116	-	-	-	-
				-	-	DB05220	AURKA	MLN8237	-	-	-	-
				-	-	DB06616	CDK2	BOSUTINIB	-	-	-	-
BRCA1	NCT02282020	Olaparib Treatment in Relapsed Germline Breast Cancer Susceptibility Gene (BRCA) Mutated Ovarian Cancer Patients Who Have Progressed at Least 6 Months After Last Platinum Treatment and Have Received at Least 2 Prior Platinum Treatments	Phase 3	Relapsed Ovarian Cancer, BRCA Mutation, Platinum Sensitivity	OLAPARIB	DB00242	POLE,POLE2	CLADRIBINE	CLADRIBINE 10 MG/10 ML VIAL USD 34.2;LEUSTATIN 10 MG/10 ML VIAL USD 102.78	-	-	Research Site,Birmingham,Alabama,United States,
				-	SINGLE AGENT CHEMOTHERAPY	DB03496	CDK2,CDK9,CDK7	FLAVOPIRIDOL	-	-	-	Research Site,Mobile,Alabama,United States,
				-	-	DB05037	CDK2	AT7519	-	-	-	Research Site,Tucson,Arizona,United States,
				-	-	DB05149	CHEK1,CHEK2	XL844	-	-	-	Research Site,Los Angeles,California,United States,
				-	-	DB05169	AURKA	AT9283	-	-	-	Research Site,Sacramento,California,United States,
				-	-	DB05198	AURKA	CYC116	-	-	-	Research Site,San Francisco,California,United States,
				-	-	DB05220	AURKA	MLN8237	-	-	-	Research Site,Aurora,Colorado,United States,
				-	-	DB06616	CDK2	BOSUTINIB	-	-	-	Research Site,Littleton,Colorado,United States,
				-	-	-	-	-	-	-	-	Research Site,New Britain,Connecticut,United States,
				-	-	-	-	-	-	-	-	Research Site,Tampa,Florida,United States,
				-	-	-	-	-	-	-	-	Research Site,Augusta,Georgia,United States,
				-	-	-	-	-	-	-	-	Research Site,Covington,Louisiana,United States,
				-	-	-	-	-	-	-	-	Research Site,Baltimore,Maryland,United States,
				-	-	-	-	-	-	-	-	Research Site,Boston,Massachusetts,United States,
				-	-	-	-	-	-	-	-	Research Site,Detroit,Michigan,United States,
				-	-	-	-	-	-	-	-	Research Site,Camden,New Jersey,United States,
				-	-	-	-	-	-	-	-	Research Site,Morristown,New Jersey,United States,
				-	-	-	-	-	-	-	-	Research Site,Albany,New York,United States,
				-	-	-	-	-	-	-	-	Research Site,Mineola,New York,United States,
				-	-	-	-	-	-	-	-	Research Site,Chapel Hill,North Carolina,United States,
				-	-	-	-	-	-	-	-	Research Site,Columbus,Ohio,United States,
				-	-	-	-	-	-	-	-	Research Site,Springfield,Oregon,United States,
				-	-	-	-	-	-	-	-	Research Site,Abington,Pennsylvania,United States,
				-	-	-	-	-	-	-	-	Research Site,Knoxville,Tennessee,United States,
				-	-	-	-	-	-	-	-	Research Site,Nashville,Tennessee,United States,
				-	-	-	-	-	-	-	-	Research Site,Bedford,Texas,United States,
				-	-	-	-	-	-	-	-	Research Site,Houston,Texas,United States,
				-	-	-	-	-	-	-	-	Research Site,Milwaukee,Wisconsin,United States,
BRCA1	NCT02345265	Olaparib and Cediranib Maleate in Treating Patients With Recurrent Ovarian, Primary Peritoneal, or Fallopian Tube Cancer	Phase 2	BRCA1 Gene Mutation	CEDIRANIB MALEATE	DB00242	POLE,POLE2	CLADRIBINE	CLADRIBINE 10 MG/10 ML VIAL USD 34.2;LEUSTATIN 10 MG/10 ML VIAL USD 102.78	-	-	Johns Hopkins University/Sidney Kimmel Cancer Center,Deborah K. Armstrong,Baltimore,Maryland,21287,United States,jhcccro@jhmi.edu,410-955-8804,
				BRCA2 Gene Mutation	OLAPARIB	DB03496	CDK2,CDK9,CDK7	FLAVOPIRIDOL	-	-	-	National Institutes of Health Clinical Center,Jung-min Lee,Bethesda,Maryland,20892,United States,leej6@mail.nih.gov,800-411-1222,
				Fallopian Tube Endometrioid Adenocarcinoma	-	DB05037	CDK2	AT7519	-	-	-	NCI - Center for Cancer Research,Jung-min Lee,Bethesda,Maryland,20892,United States,leej6@mail.nih.gov,800-411-1222,
				Fallopian Tube Serous Adenocarcinoma	-	DB05149	CHEK1,CHEK2	XL844	-	-	-	Massachusetts General Hospital Cancer Center,Joyce F. Liu,Boston,Massachusetts,02114,United States,joyce_liu@dfci.harvard.edu,877-442-3324,
				High Grade Ovarian Serous Adenocarcinoma	-	DB05169	AURKA	AT9283	-	-	-	Brigham and Women's Hospital,Joyce F. Liu,Boston,Massachusetts,02115,United States,joyce_liu@dfci.harvard.edu,877-442-3324,
				Ovarian Endometrioid Tumor	-	DB05198	AURKA	CYC116	-	-	-	Dana-Farber/Harvard Cancer Center,Joyce F. Liu,Boston,Massachusetts,02115,United States,joyce_liu@dfci.harvard.edu,877-442-3324,
				Primary Peritoneal Serous Adenocarcinoma	-	DB05220	AURKA	MLN8237	-	-	-	Duke University Medical Center,Herbert I. Hurwitz,Durham,North Carolina,27710,United States,hurwi004@mc.duke.edu,888-275-3853,
				Recurrent Fallopian Tube Carcinoma	-	DB06616	CDK2	BOSUTINIB	-	-	-	Ohio State University Comprehensive Cancer Center,David M. O'Malley,Columbus,Ohio,43210,United States,Jamesline@osumc.edu,800-293-5066,
				Recurrent Ovarian Carcinoma	-	-	-	-	-	-	-	-
				Recurrent Primary Peritoneal Carcinoma	-	-	-	-	-	-	-	-
BRCA1	NCT02482311	Safety, Tolerance, PK, and Anti-tumour Activity of AZD1775 Monotherapy in Patients With Advanced Solid Tumours	Phase 1	Ovarian Cancer, TNBC, SCLC, Other Solid Tumours	AZD 1775	DB00242	POLE,POLE2	CLADRIBINE	CLADRIBINE 10 MG/10 ML VIAL USD 34.2;LEUSTATIN 10 MG/10 ML VIAL USD 102.78	-	-	Research Site,Fayetteville,Arkansas,United States,
				-	-	DB03496	CDK2,CDK9,CDK7	FLAVOPIRIDOL	-	-	-	Research Site,Fort Myers,Florida,United States,
				-	-	DB05037	CDK2	AT7519	-	-	-	Research Site,Detroit,Michigan,United States,
				-	-	DB05149	CHEK1,CHEK2	XL844	-	-	-	Research Site,Oklahoma City,Oklahoma,United States,
				-	-	DB05169	AURKA	AT9283	-	-	-	Research Site,Nashville,Tennessee,United States,
				-	-	DB05198	AURKA	CYC116	-	-	-	Research Site,Milwaukee,Wisconsin,United States,
				-	-	DB05220	AURKA	MLN8237	-	-	-	-
				-	-	DB06616	CDK2	BOSUTINIB	-	-	-	-
BRCA1	NCT02571725	PARP-inhibition and CTLA-4 Blockade in BRCA-deficient Ovarian Cancer	Phase 1/Phase 2	Fallopian Tube Cancer	TREMELIMUMAB	DB00242	POLE,POLE2	CLADRIBINE	CLADRIBINE 10 MG/10 ML VIAL USD 34.2;LEUSTATIN 10 MG/10 ML VIAL USD 102.78	-	-	University of New Mexico Comprehensive Cancer Center,Sarah F Adams, MD,Albuquerque,New Mexico,87131,United States,vparks@salud.unm.edu,505-925-0390,
				Ovarian Cancer	OLAPARIB	DB03496	CDK2,CDK9,CDK7	FLAVOPIRIDOL	-	-	-	-
				Peritoneal Neoplasms	-	DB05037	CDK2	AT7519	-	-	-	-
				-	-	DB05149	CHEK1,CHEK2	XL844	-	-	-	-
				-	-	DB05169	AURKA	AT9283	-	-	-	-
				-	-	DB05198	AURKA	CYC116	-	-	-	-
				-	-	DB05220	AURKA	MLN8237	-	-	-	-
				-	-	DB06616	CDK2	BOSUTINIB	-	-	-	-
BRCA2	NCT01482715	A Study of Oral Rucaparib in Patients With a Solid Tumor (Phase I) or With gBRCA Mutation Ovarian Cancer (Phase II)	Phase 1/Phase 2	Advanced Solid Tumor With Evidence of Germline or Somatic BRCA	RUCAPARIB	DB00242	POLE,POLE2	CLADRIBINE	CLADRIBINE 10 MG/10 ML VIAL USD 34.2;LEUSTATIN 10 MG/10 ML VIAL USD 102.78	-	-	Sarah Cannon Research Institute,Lorie Patterson,Nashville,Tennessee,37203,United States,lorie.patterson@scresearch.net,
				Fallopian Tube Cancer	-	DB05149	CHEK1	XL844	-	-	-	-
				Ovarian Cancer	-	-	-	-	-	-	-	-
				Peritoneal Cancer	-	-	-	-	-	-	-	-
BRCA2	NCT02345265	Olaparib and Cediranib Maleate in Treating Patients With Recurrent Ovarian, Primary Peritoneal, or Fallopian Tube Cancer	Phase 2	BRCA1 Gene Mutation	CEDIRANIB MALEATE	DB00242	POLE,POLE2	CLADRIBINE	CLADRIBINE 10 MG/10 ML VIAL USD 34.2;LEUSTATIN 10 MG/10 ML VIAL USD 102.78	-	-	Johns Hopkins University/Sidney Kimmel Cancer Center,Deborah K. Armstrong,Baltimore,Maryland,21287,United States,jhcccro@jhmi.edu,410-955-8804,
				BRCA2 Gene Mutation	OLAPARIB	DB05149	CHEK1	XL844	-	-	-	National Institutes of Health Clinical Center,Jung-min Lee,Bethesda,Maryland,20892,United States,leej6@mail.nih.gov,800-411-1222,
				Fallopian Tube Endometrioid Adenocarcinoma	-	-	-	-	-	-	-	NCI - Center for Cancer Research,Jung-min Lee,Bethesda,Maryland,20892,United States,leej6@mail.nih.gov,800-411-1222,
				Fallopian Tube Serous Adenocarcinoma	-	-	-	-	-	-	-	Massachusetts General Hospital Cancer Center,Joyce F. Liu,Boston,Massachusetts,02114,United States,joyce_liu@dfci.harvard.edu,877-442-3324,
				High Grade Ovarian Serous Adenocarcinoma	-	-	-	-	-	-	-	Brigham and Women's Hospital,Joyce F. Liu,Boston,Massachusetts,02115,United States,joyce_liu@dfci.harvard.edu,877-442-3324,
				Ovarian Endometrioid Tumor	-	-	-	-	-	-	-	Dana-Farber/Harvard Cancer Center,Joyce F. Liu,Boston,Massachusetts,02115,United States,joyce_liu@dfci.harvard.edu,877-442-3324,
				Primary Peritoneal Serous Adenocarcinoma	-	-	-	-	-	-	-	Duke University Medical Center,Herbert I. Hurwitz,Durham,North Carolina,27710,United States,hurwi004@mc.duke.edu,888-275-3853,
				Recurrent Fallopian Tube Carcinoma	-	-	-	-	-	-	-	Ohio State University Comprehensive Cancer Center,David M. O'Malley,Columbus,Ohio,43210,United States,Jamesline@osumc.edu,800-293-5066,
				Recurrent Ovarian Carcinoma	-	-	-	-	-	-	-	-
				Recurrent Primary Peritoneal Carcinoma	-	-	-	-	-	-	-	-
BRCA2	NCT02571725	PARP-inhibition and CTLA-4 Blockade in BRCA-deficient Ovarian Cancer	Phase 1/Phase 2	Fallopian Tube Cancer	TREMELIMUMAB	DB00242	POLE,POLE2	CLADRIBINE	CLADRIBINE 10 MG/10 ML VIAL USD 34.2;LEUSTATIN 10 MG/10 ML VIAL USD 102.78	-	-	University of New Mexico Comprehensive Cancer Center,Sarah F Adams, MD,Albuquerque,New Mexico,87131,United States,vparks@salud.unm.edu,505-925-0390,
				Ovarian Cancer	OLAPARIB	DB05149	CHEK1	XL844	-	-	-	-
				Peritoneal Neoplasms	-	-	-	-	-	-	-	-
EPCAM	-	-		-	-	DB05319	EPCAM	OPORTUZUMAB MONATOX	-	-	-	-
				-	-	DB05831	EPCAM	ING-1	-	-	-	-
EPCAM	-	-		-	-	DB05319	EPCAM	OPORTUZUMAB MONATOX	-	-	-	-
				-	-	DB05831	EPCAM	ING-1	-	-	-	-
TP53	NCT02101775	Gemcitabine Hydrochloride With or Without WEE1 Inhibitor MK-1775 in Treating Patients With Recurrent Ovarian, Primary Peritoneal, or Fallopian Tube Cancer	Phase 2	Ovarian Brenner Tumor	GEMCITABINE HYDROCHLORIDE	DB00242	RRM2B	CLADRIBINE	CLADRIBINE 10 MG/10 ML VIAL USD 34.2;LEUSTATIN 10 MG/10 ML VIAL USD 102.78	-	-	City of Hope Comprehensive Cancer Center,Robert J. Morgan,Duarte,California,91010,United States,rmorgan@coh.org,626-256-4673,
				Ovarian Carcinosarcoma	WEE1 INHIBITOR AZD1775	DB00331	PRKAB1	METFORMIN	GLUCOPHAGE XR 500 MG TABLET SA USD 1.11;GLUCOPHAGE 500 MG TABLET USD 1.14;GLUCOPHAGE XR 500 MG TABLET USD 1.14;GLUCOPHAGE XR 500 MG 24 HOUR TABLET USD 1.17;METFORMIN HCL 850 MG TABLET USD 1.22;METFORMIN HCL 750 MG 24 HOUR TABLET USD 1.25;METFORMIN HCL 1000 MG TABLET USD 1.48;GLUCOPHAGE XR 750 MG TABLET USD 1.71;GLUCOPHAGE XR 750 MG 24 HOUR TABLET USD 1.8;GLUCOPHAGE 850 MG TABLET USD 1.94;METFORMI…	-	-	University of California Davis Comprehensive Cancer Center,Edwin A. Alvarez,Sacramento,California,95817,United States,edwin.alvarez@ucdmc.ucdavis.edu,916-734-6938,
				Ovarian Clear Cell Cystadenocarcinoma	-	DB00351	NR3C1	MEGESTROL ACETATE	MEGESTROL ACETATE 40 MG TABLET USD 1.15;MEGESTROL 40 MG TABLET USD 1.17;MEGESTROL ACETATE POWDER USD 30.6;MEGESTROL ACETATE 40 MG/ML SUSPENSION 240ML BOTTLE USD 149.71;MEGESTROL ACETATE 40 MG/ML SUSPENSION 480ML BOTTLE USD 297.92;MEGESTROL 20 MG TABLET USD 0.65;MEGACE 40 MG/ML ORAL SUSPENSION USD 0.71;MEGESTROL ACETATE 20 MG TABLET USD 0.72	-	-	City of Hope South Pasadena,Stephen C. Koehler,South Pasadena,California,91030,United States,skoehler@coh.org,626-396-2900,
				Ovarian Endometrioid Adenocarcinoma	-	DB00570	JUN	VINBLASTINE	VINBLASTINE SULF 10 MG VIAL USD 18.6	-	-	University of Colorado,Kian Behbakht,Denver,Colorado,80217-3364,United States,kian.behbakht@ucdenver.edu,303-724-2066,
				Ovarian Mucinous Cystadenocarcinoma	-	DB00635	NR3C1	PREDNISONE	PREDNISONE 5 MG/ML SOLUTION USD 1.17;STERAPRED DS 10 MG TABLET UNIPAK USD 2.93;PREDNISONE POWDER USD 3.36;STERAPRED DS 21 10 MG TABLET DISP PACK USD 64.0;APO-PREDNISONE 5 MG TABLET USD 0.04;PREDNISONE 5 MG TABLET USD 0.08;APO-PREDNISONE 1 MG TABLET USD 0.11;WINPRED 1 MG TABLET USD 0.12;APO-PREDNISONE 50 MG TABLET USD 0.18;PREDNISONE 1 MG TABLET USD 0.23;PREDNISONE 2.5 MG TABLET USD 0.25;PREDNISON…	-	-	University of Chicago Comprehensive Cancer Center,Gini F. Fleming,Chicago,Illinois,60637,United States,gfleming@medicine.bsd.uchicago.edu,773-702-6712,
				Ovarian Seromucinous Carcinoma	-	DB00860	NR3C1	PREDNISOLONE	MILLIPRED DP 5 MG DOSE PACK TABLET USD 1.18;SANDOZ PREDNISOLONE ACETATE 0.12 % SUSPENSION USD 1.33;MEDROL 4 MG DOSEPAK USD 1.59;MEDROL 4 MG TABLET USD 1.69;PRED MILD 0.12 % SUSPENSION USD 2.02;RATIO-PREDNISOLONE 1 % SUSPENSION USD 2.03;SANDOZ PREDNISOLONE ACETATE 1 % SUSPENSION USD 2.03;MEDROL 8 MG TABLET USD 2.3;DEPO-MEDROL 20 MG/ML USD 2.63;PREDNISOLONE ACETATE POWDER USD 3.36;PREDNISOLONE POWD…	-	-	Decatur Memorial Hospital,James L. Wade,Decatur,Illinois,62526,United States,JLWADE3@sbcgloabal.net,217-876-6600,
				Ovarian Serous Cystadenocarcinoma	-	DB01169	JUN,AKT1	ARSENIC TRIOXIDE	ARSENIC TRIOXIDE POWDER USD 2.59;TRISENOX 10 MG/10 ML AMPULE USD 43.58	-	-	Indiana University/Melvin and Bren Simon Cancer Center,Daniela E. Matei,Indianapolis,Indiana,46202,United States,dmatei@iu.edu,317-278-8844,
				Ovarian Serous Surface Papillary Adenocarcinoma	-	DB01229	BCL2	PACLITAXEL	PACLITAXEL 150 MG/25 ML VIAL USD 3.36;PACLITAXEL 30 MG/5 ML VIAL USD 3.54;PACLITAXEL 100 MG/16.7 ML VIAL USD 4.45;PACLITAXEL 300 MG/50 ML VIAL USD 5.31;ONXOL 30 MG/5 ML VIAL USD 34.54;ONXOL 300 MG/50 ML VIAL USD 34.54;TAXOL 30 MG/5 ML VIAL USD 35.06;ABRAXANE 100 MG VIAL USD 1119.6	-	-	Mayo Clinic,Andrea E. Wahner Hendrickson,Rochester,Minnesota,55905,United States,wahnerhendrickson.andrea@mayo.edu,507-285-2411,
				Recurrent Fallopian Tube Carcinoma	-	DB01248	BCL2	DOCETAXEL	TAXOTERE 20 MG/0.5 ML VIAL USD 477.37	-	ABCC2 Canalicular multispecific organic anion transporter 1 rs12762549 None Leukopenia, neutropenia;	Metro Minnesota Community Oncology Research Consortium,Patrick J. Flynn,Saint Louis Park,Minnesota,55416,United States,MMCCOP@parknicollet.com,612-863-8585,
				Recurrent Ovarian Carcinoma	-	DB02342	HIF1A	2-METHOXYESTRADIOL	-	-	-	Washington University School of Medicine,Matthew A. Powell,Saint Louis,Missouri,63110,United States,powellm@wudosis.wustl.edu,
				Recurrent Primary Peritoneal Carcinoma	-	DB02546	HDAC2,HDAC1	VORINOSTAT	ZOLINZA 100 MG CAPSULE USD 83.11	-	-	Penn State Hershey Cancer Institute-Clinical Trials Office,Chandra P. Belani,Hershey,Pennsylvania,17033-0850,United States,cbelani@psu.edu,717-531-1078,
				Undifferentiated Ovarian Carcinoma	-	DB03496	CDK2,CDK5	FLAVOPIRIDOL	-	-	-	Fox Chase Cancer Center,Gina M. Mantia Smaldone,Philadelphia,Pennsylvania,19111,United States,gina.mantia-smaldone@fccc.edu,215-728-3175,
				-	-	DB04940	BCL2	E7389	-	-	-	University of Pittsburgh Cancer Institute (UPCI),Alexander B. Olawaiye,Pittsburgh,Pennsylvania,15232,United States,olawaiyea@mail.magee.edu,412-641-1153,
				-	-	DB05037	CDK2	AT7519	-	-	-	University of Wisconsin Hospital and Clinics,Lisa M. Barroilhet,Madison,Wisconsin,53792,United States,barroilhet@wisc.edu,608-263-1210,
				-	-	DB05141	BIRC5	LY2181308	-	-	-	-
				-	-	DB05149	CHEK1,CHEK2	XL844	-	-	-	-
				-	-	DB05169	AURKB,AURKA	AT9283	-	-	-	-
				-	-	DB05198	AURKA	CYC116	-	-	-	-
				-	-	DB05210	PRKDC	SF1126	-	-	-	-
				-	-	DB05220	AURKA	MLN8237	-	-	-	-
				-	-	DB05223	HDAC2,HDAC1	SB939	-	-	-	-
				-	-	DB05281	BCL2	S-8184	-	-	-	-
				-	-	DB05297	BCL2	DHA-PACLITAXEL	-	-	-	-
				-	-	DB05651	HDAC2,HDAC1	MGCD-0103	-	-	-	-
				-	-	DB05764	BCL2L2,BCL2	ABT-263	-	-	-	-
				-	-	DB05785	JUN	LGD-1550	-	-	-	-
				-	-	DB05895	TNFRSF10B	HGS-TR2J	-	-	-	-
				-	-	DB05921	HDAC1	CRA-024781	-	-	-	-
				-	-	DB06603	HDAC2,HDAC1	PANOBINOSTAT	-	-	-	-
				-	-	DB06616	CDK2	BOSUTINIB	-	-	-	-
				-	-	DB08846	CSNK2A1	ELLAGIC ACID	-	-	-	-
				-	-	DB08896	MAPK11	REGORAFENIB	-	-	-	-
				-	-	DB08912	SIK1	DABRAFENIB	-	-	-	-
TP53	NCT02275039	p53MVA Vaccine and Gemcitabine Hydrochloride in Treating Patients With Recurrent Ovarian Epithelial Cancer	Phase 1	Recurrent Fallopian Tube Carcinoma	GEMCITABINE HYDROCHLORIDE	DB00242	RRM2B	CLADRIBINE	CLADRIBINE 10 MG/10 ML VIAL USD 34.2;LEUSTATIN 10 MG/10 ML VIAL USD 102.78	-	-	City of Hope Medical Center,Mihaela C. Cristea,Duarte,California,91010,United States,800-826-4673,
				Recurrent Ovarian Epithelial Cancer	-	DB00331	PRKAB1	METFORMIN	GLUCOPHAGE XR 500 MG TABLET SA USD 1.11;GLUCOPHAGE 500 MG TABLET USD 1.14;GLUCOPHAGE XR 500 MG TABLET USD 1.14;GLUCOPHAGE XR 500 MG 24 HOUR TABLET USD 1.17;METFORMIN HCL 850 MG TABLET USD 1.22;METFORMIN HCL 750 MG 24 HOUR TABLET USD 1.25;METFORMIN HCL 1000 MG TABLET USD 1.48;GLUCOPHAGE XR 750 MG TABLET USD 1.71;GLUCOPHAGE XR 750 MG 24 HOUR TABLET USD 1.8;GLUCOPHAGE 850 MG TABLET USD 1.94;METFORMI…	-	-	-
				Recurrent Primary Peritoneal Carcinoma	-	DB00351	NR3C1	MEGESTROL ACETATE	MEGESTROL ACETATE 40 MG TABLET USD 1.15;MEGESTROL 40 MG TABLET USD 1.17;MEGESTROL ACETATE POWDER USD 30.6;MEGESTROL ACETATE 40 MG/ML SUSPENSION 240ML BOTTLE USD 149.71;MEGESTROL ACETATE 40 MG/ML SUSPENSION 480ML BOTTLE USD 297.92;MEGESTROL 20 MG TABLET USD 0.65;MEGACE 40 MG/ML ORAL SUSPENSION USD 0.71;MEGESTROL ACETATE 20 MG TABLET USD 0.72	-	-	-
				-	-	DB00570	JUN	VINBLASTINE	VINBLASTINE SULF 10 MG VIAL USD 18.6	-	-	-
				-	-	DB00635	NR3C1	PREDNISONE	PREDNISONE 5 MG/ML SOLUTION USD 1.17;STERAPRED DS 10 MG TABLET UNIPAK USD 2.93;PREDNISONE POWDER USD 3.36;STERAPRED DS 21 10 MG TABLET DISP PACK USD 64.0;APO-PREDNISONE 5 MG TABLET USD 0.04;PREDNISONE 5 MG TABLET USD 0.08;APO-PREDNISONE 1 MG TABLET USD 0.11;WINPRED 1 MG TABLET USD 0.12;APO-PREDNISONE 50 MG TABLET USD 0.18;PREDNISONE 1 MG TABLET USD 0.23;PREDNISONE 2.5 MG TABLET USD 0.25;PREDNISON…	-	-	-
				-	-	DB00860	NR3C1	PREDNISOLONE	MILLIPRED DP 5 MG DOSE PACK TABLET USD 1.18;SANDOZ PREDNISOLONE ACETATE 0.12 % SUSPENSION USD 1.33;MEDROL 4 MG DOSEPAK USD 1.59;MEDROL 4 MG TABLET USD 1.69;PRED MILD 0.12 % SUSPENSION USD 2.02;RATIO-PREDNISOLONE 1 % SUSPENSION USD 2.03;SANDOZ PREDNISOLONE ACETATE 1 % SUSPENSION USD 2.03;MEDROL 8 MG TABLET USD 2.3;DEPO-MEDROL 20 MG/ML USD 2.63;PREDNISOLONE ACETATE POWDER USD 3.36;PREDNISOLONE POWD…	-	-	-
				-	-	DB01169	JUN,AKT1	ARSENIC TRIOXIDE	ARSENIC TRIOXIDE POWDER USD 2.59;TRISENOX 10 MG/10 ML AMPULE USD 43.58	-	-	-
				-	-	DB01229	BCL2	PACLITAXEL	PACLITAXEL 150 MG/25 ML VIAL USD 3.36;PACLITAXEL 30 MG/5 ML VIAL USD 3.54;PACLITAXEL 100 MG/16.7 ML VIAL USD 4.45;PACLITAXEL 300 MG/50 ML VIAL USD 5.31;ONXOL 30 MG/5 ML VIAL USD 34.54;ONXOL 300 MG/50 ML VIAL USD 34.54;TAXOL 30 MG/5 ML VIAL USD 35.06;ABRAXANE 100 MG VIAL USD 1119.6	-	-	-
				-	-	DB01248	BCL2	DOCETAXEL	TAXOTERE 20 MG/0.5 ML VIAL USD 477.37	-	ABCC2 Canalicular multispecific organic anion transporter 1 rs12762549 None Leukopenia, neutropenia;	-
				-	-	DB02342	HIF1A	2-METHOXYESTRADIOL	-	-	-	-
				-	-	DB02546	HDAC2,HDAC1	VORINOSTAT	ZOLINZA 100 MG CAPSULE USD 83.11	-	-	-
				-	-	DB03496	CDK2,CDK5	FLAVOPIRIDOL	-	-	-	-
				-	-	DB04940	BCL2	E7389	-	-	-	-
				-	-	DB05037	CDK2	AT7519	-	-	-	-
				-	-	DB05141	BIRC5	LY2181308	-	-	-	-
				-	-	DB05149	CHEK1,CHEK2	XL844	-	-	-	-
				-	-	DB05169	AURKB,AURKA	AT9283	-	-	-	-
				-	-	DB05198	AURKA	CYC116	-	-	-	-
				-	-	DB05210	PRKDC	SF1126	-	-	-	-
				-	-	DB05220	AURKA	MLN8237	-	-	-	-
				-	-	DB05223	HDAC2,HDAC1	SB939	-	-	-	-
				-	-	DB05281	BCL2	S-8184	-	-	-	-
				-	-	DB05297	BCL2	DHA-PACLITAXEL	-	-	-	-
				-	-	DB05651	HDAC2,HDAC1	MGCD-0103	-	-	-	-
				-	-	DB05764	BCL2L2,BCL2	ABT-263	-	-	-	-
				-	-	DB05785	JUN	LGD-1550	-	-	-	-
				-	-	DB05895	TNFRSF10B	HGS-TR2J	-	-	-	-
				-	-	DB05921	HDAC1	CRA-024781	-	-	-	-
				-	-	DB06603	HDAC2,HDAC1	PANOBINOSTAT	-	-	-	-
				-	-	DB06616	CDK2	BOSUTINIB	-	-	-	-
				-	-	DB08846	CSNK2A1	ELLAGIC ACID	-	-	-	-
				-	-	DB08896	MAPK11	REGORAFENIB	-	-	-	-
				-	-	DB08912	SIK1	DABRAFENIB	-	-	-	-

## Sheet: Table S9
Table S9. Comprehensive Cancer Drug Panel Summary
Gene	Trial ID	Trial Description	Conditions	Drug Intervention	Number of DrugBank Entries	Number of Locations
ABL1	NCT00255684	Fludarabine, Cyclophosphamide, and Total-Body Irradiation Followed by Cyclosporine and Mycophenolate Mofetil in Treating Patients Who Are Undergoing a Donor Umbilical Cord Blood Transplant for Hematologic Cancer	Chronic Myeloproliferative Disorders	cyclophosphamide	7	1
			Graft Versus Host Disease	cyclosporine
			Leukemia	fludarabine phosphate
			Lymphoma	mycophenolate mofetil
			Multiple Myeloma and Plasma Cell Neoplasm
			Myelodysplastic Syndromes
			Myelodysplastic/Myeloproliferative Neoplasms
ABL1	NCT00397813	Fludarabine Phosphate and Total Body Irradiation Followed by a Donor Peripheral Stem Cell Transplant in Treating Patients With Myelodysplastic Syndromes or Myeloproliferative Disorders	Atypical Chronic Myeloid Leukemia, BCR-ABL1 Negative	Cyclosporine	7	3
			Chronic Myelomonocytic Leukemia	Fludarabine Phosphate
			Essential Thrombocythemia	Mycophenolate Mofetil
			Myeloproliferative Neoplasm
			Paroxysmal Nocturnal Hemoglobinuria
			Polycythemia Vera
			Polycythemia Vera, Post-Polycythemic Myelofibrosis Phase
			Primary Myelofibrosis
			Refractory Anemia
			Refractory Anemia With Excess Blasts
			Refractory Anemia With Ring Sideroblasts
			Refractory Cytopenia With Multilineage Dysplasia
			Refractory Cytopenia With Multilineage Dysplasia and Ring Sideroblasts
			de Novo Myelodysplastic Syndrome
ABL1	NCT00719888	Umbilical Cord Blood Transplant, Cyclophosphamide, Fludarabine Phosphate, and Total-Body Irradiation in Treating Patients With Hematologic Disease	Acute Biphenotypic Leukemia	Cyclophosphamide	7	2
			Acute Myeloid Leukemia Arising From Previous Myelodysplastic Syndrome	Cyclosporine
			Acute Myeloid Leukemia in Remission	Fludarabine Phosphate
			Adult Acute Lymphoblastic Leukemia in Complete Remission	Mycophenolate Mofetil
			Aggressive Non-Hodgkin Lymphoma
			B Acute Lymphoblastic Leukemia With t(1;19)(q23;p13.3); E2A-PBX1 (TCF3-PBX1)
			B Acute Lymphoblastic Leukemia With t(9;22)(q34;q11.2); BCR-ABL1
			Burkitt Lymphoma
			Childhood Acute Lymphoblastic Leukemia in Complete Remission
			Chronic Phase Chronic Myelogenous Leukemia, BCR-ABL1 Positive
			Lymphoblastic Lymphoma
			Mantle Cell Lymphoma
			Myelofibrosis
			Pancytopenia
			Plasma Cell Myeloma
			Prolymphocytic Leukemia
			Recurrent Childhood Acute Myeloid Leukemia
			Recurrent Chronic Lymphocytic Leukemia
			Recurrent Chronic Myelogenous Leukemia, BCR-ABL1 Positive
			Recurrent Follicular Lymphoma
			Recurrent Lymphoplasmacytic Lymphoma
			Recurrent Marginal Zone Lymphoma
			Recurrent Small Lymphocytic Lymphoma
			Refractory Anemia With Excess Blasts
ABL1	NCT00723099	Donor Umbilical Cord Blood Transplant in Treating Patients With Hematologic Cancer	Acute Biphenotypic Leukemia	Cyclophosphamide	7	4
			Acute Lymphoblastic Leukemia	Cyclosporine
			Acute Myeloid Leukemia	Fludarabine Phosphate
			Aggressive Non-Hodgkin Lymphoma	Mycophenolate Mofetil
			Chronic Myelogenous Leukemia, BCR-ABL1 Positive
			Chronic Phase Chronic Myelogenous Leukemia, BCR-ABL1 Positive
			Indolent Non-Hodgkin Lymphoma
			Malignant Lymphoma, Large Cell Type
			Mixed Phenotype Acute Leukemia
			Myelodysplastic Syndrome
			Myeloproliferative Neoplasm
			Recurrent Chronic Lymphocytic Leukemia
			Recurrent Follicular Lymphoma
			Recurrent Lymphoplasmacytic Lymphoma
			Recurrent Mantle Cell Lymphoma
			Recurrent Marginal Zone Lymphoma
			Recurrent Plasma Cell Myeloma
			Recurrent Small Lymphocytic Lymphoma
			Recurrent T-Cell Non-Hodgkin Lymphoma
			Refractory Chronic Lymphocytic Leukemia
			Refractory Chronic Myelogenous Leukemia, BCR-ABL1 Positive
			Refractory Follicular Lymphoma
			Refractory Hodgkin Lymphoma
			Refractory Lymphoplasmacytic Lymphoma
			Refractory Mantle Cell Lymphoma
			Refractory Small Lymphocytic Lymphoma
			T-Cell Non-Hodgkin Lymphoma
ABL1	NCT00796068	Treosulfan, Fludarabine Phosphate, and Total-Body Irradiation in Treating Patients With Hematological Cancer Who Are Undergoing Umbilical Cord Blood Transplant	Acute Biphenotypic Leukemia	Cyclosporine	7	1
			Adult Acute Lymphoblastic Leukemia in Remission	Fludarabine Phosphate
			Adult Acute Myeloid Leukemia in Remission	Mycophenolate Mofetil
			Adult Myelodysplastic Syndrome	Treosulfan
			Childhood Acute Lymphoblastic Leukemia in Remission
			Childhood Acute Myeloid Leukemia in Remission
			Childhood Chronic Myelogenous Leukemia, BCR-ABL1 Positive
			Childhood Myelodysplastic Syndrome
			Chronic Phase Chronic Myelogenous Leukemia, BCR-ABL1 Positive
			Recurrent Chronic Myelogenous Leukemia, BCR-ABL1 Positive
			Refractory Anemia With Excess Blasts
			Refractory Chronic Myelogenous Leukemia, BCR-ABL1 Positive
ABL1	NCT01190930	Risk-Adapted Chemotherapy in Treating Younger Patients With Newly Diagnosed Standard-Risk Acute Lymphoblastic Leukemia or Localized B-Lineage Lymphoblastic Lymphoma	Adult B Lymphoblastic Lymphoma	Cyclophosphamide	7	179
			Childhood B Acute Lymphoblastic Leukemia	Cytarabine
			Childhood B Acute Lymphoblastic Leukemia With t(9;22)(q34;q11.2); BCR-ABL1	Dexamethasone
			Childhood B Lymphoblastic Lymphoma	Doxorubicin Hydrochloride
			Down Syndrome	Leucovorin Calcium
			Stage I B Lymphoblastic Lymphoma	Mercaptopurine
			Stage II B Lymphoblastic Lymphoma	Methotrexate
			Untreated Adult Acute Lymphoblastic Leukemia	Pegaspargase
			Untreated Childhood Acute Lymphoblastic Leukemia	Thioguanine
				Vincristine Sulfate
ABL1	NCT01231412	Graft-Versus-Host Disease Prophylaxis in Treating Patients With Hematologic Malignancies Undergoing Unrelated Donor Peripheral Blood Stem Cell Transplant	Acute Lymphoblastic Leukemia	Cyclosporine	7	5
			Acute Myeloid Leukemia	Fludarabine Phosphate
			Aggressive Non-Hodgkin Lymphoma	Mycophenolate Mofetil
			Chronic Lymphocytic Leukemia	Sirolimus
			Diffuse Large B-Cell Lymphoma
			Hematopoietic and Lymphoid Cell Neoplasm
			Indolent Non-Hodgkin Lymphoma
			Mantle Cell Lymphoma
			Myelodysplastic Syndrome
			Myeloproliferative Neoplasm
			Prolymphocytic Leukemia
			Recurrent Chronic Lymphocytic Leukemia
			Recurrent Plasma Cell Myeloma
			Refractory Chronic Lymphocytic Leukemia
			Refractory Chronic Myelogenous Leukemia, BCR-ABL1 Positive
			Refractory Hodgkin Lymphoma
			Small Lymphocytic Lymphoma
			T-Cell Chronic Lymphocytic Leukemia
			Waldenstrom Macroglobulinemia
ABL1	NCT01251575	Sirolimus, Cyclosporine, and Mycophenolate Mofetil in Preventing Graft-versus-Host Disease in Treating Patients With Hematologic Malignancies Undergoing Donor Peripheral Blood Stem Cell Transplant	Adult Acute Lymphoblastic Leukemia	Cyclosporine	7	3
			Adult Acute Myeloid Leukemia	Fludarabine Phosphate
			Adult Diffuse Large B-Cell Lymphoma	Mycophenolate Mofetil
			Adult Myelodysplastic Syndrome	Sirolimus
			Adult Non-Hodgkin Lymphoma
			Aggressive Non-Hodgkin Lymphoma
			Childhood Acute Lymphoblastic Leukemia
			Childhood Acute Myeloid Leukemia
			Childhood Diffuse Large B -Cell Lymphoma
			Childhood Myelodysplastic Syndrome
			Childhood Non-Hodgkin Lymphoma
			Chronic Lymphocytic Leukemia
			Chronic Lymphocytic Leukemia in Remission
			Chronic Phase Chronic Myelogenous Leukemia, BCR-ABL1 Positive
			Hematopoietic and Lymphoid Cell Neoplasm
			Mantle Cell Lymphoma
			Plasma Cell Myeloma
			Prolymphocytic Leukemia
			Recurrent Chronic Lymphocytic Leukemia
			Recurrent Diffuse Large B-Cell Lymphoma
			Recurrent Hodgkin Lymphoma
			Refractory Chronic Lymphocytic Leukemia
			T-Cell Chronic Lymphocytic Leukemia
			T-Cell Prolymphocytic Leukemia
			Waldenstrom Macroglobulinemia
ABL1	NCT01690520	Donor Umbilical Cord Blood Transplant With or Without Ex-vivo Expanded Cord Blood Progenitor Cells in Treating Patients With Acute Myeloid Leukemia, Acute Lymphoblastic Leukemia, Chronic Myelogenous Leukemia, or Myelodysplastic Syndromes	Acute Biphenotypic Leukemia	Cyclophosphamide	7	6
			Acute Lymphoblastic Leukemia in Remission	Cyclosporine
			Acute Myeloid Leukemia Arising From Previous Myelodysplastic Syndrome	Fludarabine Phosphate
			Acute Myeloid Leukemia in Remission	Mycophenolate Mofetil
			Chronic Myelogenous Leukemia, BCR-ABL1 Positive
			Mixed Phenotype Acute Leukemia
			Myelodysplastic Syndrome
			Pancytopenia
			Refractory Anemia
			Refractory Anemia With Excess Blasts
			Refractory Anemia With Excess Blasts in Transformation
			Secondary Acute Myeloid Leukemia
ABL1	NCT01858740	Selective Depletion of CD45RA+ T Cells From Allogeneic Peripheral Blood Stem Cell Grafts for the Prevention of GVHD in Children	Accelerated Phase Chronic Myelogenous Leukemia, BCR-ABL1 Positive	Fludarabine Phosphate	7	1
			Acute Biphenotypic Leukemia	Methotrexate
			Acute Leukemia of Ambiguous Lineage	Tacrolimus
			Acute Undifferentiated Leukemia	Thiotepa
			Blast Phase Chronic Myelogenous Leukemia, BCR-ABL1 Positive
			Childhood Acute Lymphoblastic Leukemia in Remission
			Childhood Acute Myeloid Leukemia in Remission
			Childhood Chronic Myelogenous Leukemia, BCR-ABL1 Positive
			Recurrent Childhood Acute Lymphoblastic Leukemia
			Recurrent Childhood Acute Myeloid Leukemia
			Refractory Anemia With Excess Blasts
ABL1	NCT01871311	A Phase I Study of Nilontinib and Cetuximab in Patients With Solid Tumors	Colorectal Cancer	Nilotinib + Cetuximab	7	1
			Head and Neck Cancer
ABL1	NCT02092324	Ruxolitinib Phosphate in Treating Patients With Chronic Neutrophilic Leukemia or Atypical Chronic Myeloid Leukemia	Atypical Chronic Myeloid Leukemia, BCR-ABL1 Negative	Ruxolitinib Phosphate	7	7
			Chronic Neutrophilic Leukemia
ABL1	NCT02220985	Selective Depletion of CD45RA+ Naive T Cells From Allogeneic Peripheral Blood Stem Cell Grafts From HLA-Matched Related and Unrelated Donors for Prevention of GVHD	Accelerated Phase Chronic Myelogenous Leukemia, BCR-ABL1 Positive	Cyclophosphamide	7	1
			Acute Biphenotypic Leukemia	Fludarabine Phosphate
			Acute Leukemia of Ambiguous Lineage	Methotrexate
			Acute Undifferentiated Leukemia	Mycophenolate Mofetil
			Adult Acute Lymphoblastic Leukemia in Remission	Tacrolimus
			Adult Acute Myeloid Leukemia in Remission	Thiotepa
			Blast Phase Chronic Myelogenous Leukemia, BCR-ABL1 Positive
			Childhood Acute Lymphoblastic Leukemia in Remission
			Childhood Acute Myeloid Leukemia in Remission
			Graft Versus Host Disease
			Recurrent Adult Acute Lymphoblastic Leukemia
			Recurrent Adult Acute Myeloid Leukemia
			Recurrent Childhood Acute Lymphoblastic Leukemia
			Recurrent Childhood Acute Myeloid Leukemia
			Recurrent Chronic Myelogenous Leukemia, BCR-ABL1 Positive
			Refractory Anemia With Excess Blasts
ABL1	NCT02272998	Ponatinib for Patients Whose Advanced Solid Tumor Cancer Has Activating Mutations Involving the Following Genes: FGFR1, FGFR2, FGFR3, FGFR4, RET, KIT.	Malignant Neoplasm	ponatinib hydrochloride	7	2
ABL1	NCT02381548	Phase I Trial of AZD1775 and Belinostat in Treating Patients With Relapsed or Refractory Myeloid Malignancies or Untreated Acute Myeloid Leukemia	Blast Phase Chronic Myelogenous Leukemia, BCR-ABL1 Positive	Belinostat	7	2
			Previously Treated Myelodysplastic Syndrome	WEE1 Inhibitor AZD1775
			Recurrent Adult Acute Myeloid Leukemia
			Refractory Chronic Myelogenous Leukemia, BCR-ABL1 Positive
			Secondary Acute Myeloid Leukemia
			Therapy-Related Acute Myeloid Leukemia
			Untreated Adult Acute Myeloid Leukemia
ABL1	NCT02728700	Sirolimus and Mycophenolate Mofetil in Preventing GVHD in Patients With Hematologic Malignancies Undergoing HSCT	Adult Hodgkin Lymphoma	Mycophenolate Mofetil	7	1
			Adult Myelodysplastic Syndrome	Sirolimus
			Blast Phase Chronic Myelogenous Leukemia, BCR-ABL1 Positive
			Childhood Chronic Myelogenous Leukemia, BCR-ABL1 Positive
			Childhood Hodgkin Lymphoma
			Childhood Myelodysplastic Syndrome
			Chronic Phase Chronic Myelogenous Leukemia, BCR-ABL1 Positive
			Myelofibrosis
			Primary Myelofibrosis
			Recurrent Adult Acute Lymphoblastic Leukemia
			Recurrent Adult Acute Myeloid Leukemia
			Recurrent Adult Non-Hodgkin Lymphoma
			Recurrent Childhood Acute Lymphoblastic Leukemia
			Recurrent Childhood Acute Myeloid Leukemia
			Recurrent Childhood Non-Hodgkin Lymphoma
			Recurrent Chronic Myelogenous Leukemia, BCR-ABL1 Positive
			Refractory Chronic Myelogenous Leukemia, BCR-ABL1 Positive
			Refractory Non-Hodgkin Lymphoma
ABL1	NCT02730195	Pioglitazone and Tyrosine Kinase Inhibitor in Treating Patients With Relapsed Chronic Myeloid Leukemia	Chronic Myelogenous Leukemia, BCR-ABL1 Positive	Pioglitazone Hydrochloride	7	1
			Recurrent Chronic Myelogenous Leukemia, BCR-ABL1 Positive	Tyrosine Kinase Inhibitor (TKI)
AKT1	NCT01226316	Safety, Tolerability & Potential Anti-cancer Activity of Increasing Doses of AZD5363 in Different Treatment Schedules	AKT1	AZD5363	1	10
			Advanced Solid Malignancy	AZD5363
			Advanced or Metastatic Breast Cancer	AZD5363
			Cervical Cancer	AZD5363
			ER+
			Endometrial Cancer
			HER2+
			Ovarian Cancer
			PIK3CA
			PTEN
			Pharmacodynamics
			Pharmacokinetics
			Safety and Tolerability
			Tumour Response
AKT1	NCT01915576	Phase I Dose Escalation Study With an Allosteric AKT 1/2 Inhibitor in Patients	Neoplasms	BAY1125976	1	3
				BAY1125976
				BAY1125976
AKT1	NCT01964924	Trametinib and Akt Inhibitor GSK2141795 in Treating Patients With Metastatic Triple-Negative Breast Cancer	Estrogen Receptor Negative	Akt Inhibitor GSK2141795	1	8
			HER2/Neu Negative	Trametinib
			Invasive Breast Carcinoma
			Progesterone Receptor Negative
			Recurrent Breast Carcinoma
			Stage IV Breast Cancer
			Triple-Negative Breast Carcinoma
AKT1	NCT02278965	Metformin and Omega-3 Fatty Acids in Woman With a History of Early Stage Breast Cancer	Breast Neoplasms	Metformin	1	1
			Stage 0 Breast Carcinoma	Omega-3 fatty acids
			Stage I Breast Carcinoma
			Stage II Breast Carcinoma
			Stage III Breast Carcinoma
AKT1	NCT02476955	Open-label Phase 1b Study of ARQ 092 in Combination With Carboplatin Plus Paclitaxel	Breast Cancer Triple Negative	ARQ 092 + carboplatin + paclitaxel	1	2
			Cervical Cancer
			Endometrial Cancer
			Ovarian Cancer
AKT1	NCT02594215	Dose Finding Trial of ARQ 092 in Children and Adults With Proteus Syndrome	Proteus Syndrome	ARQ 092	1	1
ALK	NCT00585195	A Study Of Oral PF-02341066, A c-Met/Hepatocyte Growth Factor Tyrosine Kinase Inhibitor, In Patients With Advanced Cancer	Advanced Malignancies (Except Leukemia)	PF-02341066	3	26
			Non-Small Cell Lung Cancer (ALK-positive)	Rifampin
			Non-Small Cell Lung Cancer (ROS Marker Positive)	Itraconazole
			Non-Small Cell Lung Cancer (c-Met Dependent)
			Systemic Anaplastic Large-Cell Lymphoma
ALK	NCT01531361	Sorafenib or Crizotinib and Vemurafenib in Advanced Cancer	Advanced Cancers	Vemurafenib	3	1
				Sorafenib
				Crizotinib
ALK	NCT01575717	The Effect of Vitamin D Repletion in Patients With Hepatocellular Carcinoma on the Orthotopic Liver Transplant List	Hepatocellular Carcinoma	Vitamin D3 4000 IU	3	1
			Vitamin D Deficiency	Vitamin D3 2000 IU
ALK	NCT01625234	Phase 1/2 Study of X-396, an Oral ALK Inhibitor, in Patients With ALK-positive Non-Small Cell Lung Cancer	Advanced Solid Tumors	X-396	3	21
			Non-small Cell Lung Cancer
ALK	NCT01742286	Phase I Study of LDK378 in Pediatric, Malignancies With a Genetic Alteration in Anaplastic Lymphoma Kinase (ALK)	Anaplastic Lymphoma Kinase (ALK)	LDK378	3	6
ALK	NCT01822496	Erlotinib Hydrochloride or Crizotinib and Chemoradiation Therapy in Treating Patients With Stage III Non-small Cell Lung Cancer	Stage IIIA Non-Small Cell Lung Cancer	Carboplatin	3	113
			Stage IIIB Non-Small Cell Lung Cancer	Cisplatin
				Crizotinib
				Erlotinib Hydrochloride
				Etoposide
				Paclitaxel
ALK	NCT01829217	Sunitinib in Never-Smokers With Lung Adenocarcinoma	Lung Cancer	Sunitinib	3	4
ALK	NCT01970865	A Study Of PF-06463922 An ALK/ROS1 Inhibitor In Patients With Advanced Non Small Cell Lung Cancer With Specific Molecular Alterations	ALK-positive Non Small Cell Lung Cancer (NSCLC) and ROS1-positive NSCLC	PF-06463922	3	35
				Crizotinib
ALK	NCT01999972	A Phase 1b Study Of Axitinib In Combination With Crizotinib In Patients With Advanced Solid Tumors	Advanced Solid Tumors	axitinib	3	15
				crizotinib
				axitinib
				crizotinib
				axitinib
				crizotinib
ALK	NCT02013219	A Phase 1b Study of Atezolizumab in Combination With Erlotinib or Alectinib in Participants With Non-Small Cell Lung Cancer	Non-Small Cell Lung Cancer	Alectinib	3	10
				Atezolizumab
				Erlotinib
ALK	NCT02097810	Study of Oral RXDX-101 in Adult Patients With Locally Advanced or Metastatic Cancer Targeting NTRK1, NTRK2, NTRK3, ROS1, or ALK Molecular Alterations.	Locally Advanced Solid Tumors	Entrectinib	3	8
			Metastatic Solid Tumors
ALK	NCT02134912	S1300: Pemetrexed Disodium With or Without Crizotinib in Treating Patients With Stage IV Non-Small Cell Lung Cancer That Has Progressed After Crizotinib	Adenocarcinoma of the Lung	crizotinib	3	93
			Large Cell Lung Cancer	pemetrexed disodium
			Recurrent Non-small Cell Lung Cancer
			Stage IV Non-small Cell Lung Cancer
ALK	NCT02160106	First in Human Dose Escalation Study of TEW-7197 in Subjects With Advanced Stage Solid Tumors	Advanced Stage Solid Tumors	TEW-7197	3	3
ALK	NCT02186821	Ceritinib (LDK378) for Patients Whose Tumors Have Aberrations in ALK or ROS1 (SIGNATURE)	Tumors With Aberrations in ALK or ROS1	Ceritinib (LDK378)	3	30
ALK	NCT02201992	Crizotinib in Treating Patients With Stage IB-IIIA Non-small Cell Lung Cancer That Has Been Removed by Surgery and ALK Fusion Mutations (An ALCHEMIST Treatment Trial)	Stage IB Non-Small Cell Lung Carcinoma	Crizotinib	3	1007
			Stage IIA Non-Small Cell Lung Carcinoma
			Stage IIB Non-Small Cell Lung Carcinoma
			Stage IIIA Non-Small Cell Lung Cancer
ALK	NCT02223819	Crizotinib in High-Risk Uveal Melanoma Following Definitive Therapy	Uveal Melanoma	Crizotinib	3	2
ALK	NCT02227940	Ceritinib and Combination Chemotherapy in Treating Patients With Advanced Solid Tumors or Locally Advanced or Metastatic Pancreatic Cancer	Adult Solid Neoplasm	Ceritinib	3	1
			Metastatic Pancreatic Adenocarcinoma	Cisplatin
			Pancreatic Adenocarcinoma	Gemcitabine Hydrochloride
			Stage III Pancreatic Cancer	Paclitaxel Albumin-Stabilized Nanoparticle Formulation
			Stage IV Pancreatic Cancer
ALK	NCT02277457	Personalized Adaptive Radiation Therapy With Individualized Systemic Targeted Therapy (PARTIST) for Locally Advanced, Non-small Cell Lung Cancer With Genomic Driver Mutations	Non-Small Cell Lung Cancer	Erlotinib	3	1
				Crizotinib
ALK	NCT02289144	Ceritinib in Mutation and Oncogene Directed Therapy in Thyroid Cancer	Locally Advanced Anaplastic, Undifferentiated Thyroid Cancer	Ceritinib	3	1
			Metastatic Anaplastic Thyroid Cancer
ALK	NCT02292550	Study of Safety and Efficacy of LEE011 and Ceritinib in Patients With ALK-positive Non-small Cell Lung Cancer.	Non-small Cell Lung Cancer	LEE011	3	2
				Ceritinib
ALK	NCT02299505	Pharmacokinetic and Safety Study of Lower Doses of Ceritinib Taken With a Low-fat Meal Versus 750 mg of Ceritinib in the Fasted State in Adult Patients With (ALK-positive) Metastatic Non-small Cell Lung Cancer (NSCLC)	Non-Small Cell Lung Cancer.	ceritinib	3	19
ALK	NCT02336451	A Phase II Study to Evaluate the Efficacy and Safety of Oral Ceritinib in Patients With ALK-positive NSCLC Metastatic to the Brain and/or to Leptomeninges	ALK-positive NSCLC Metastatic to the Brain and/or to Leptomeninges.	LDK378	3	11
ALK	NCT02343679	Novartis PhII Ceritinib (LDK378) in R/R ALK+ Hem Malignancies	Hematologic Malignancies	ceritinib	3	1
ALK	NCT02352948	A Global Study to Assess the Effects of MEDI4736, Given as Monotherapy or in Combination With Tremelimumab Determined by PD-L1 Expression Versus Standard of Care in Patients With Locally Advanced or Metastatic Non Small Cell Lung Cancer	Non-Small Cell Lung Cancer (NSCLC)	MEDI4736	3	39
				Vinorelbine
				Gemcitabine
				Erlotinib
				MEDI4736 in combination with tremelimumab (anti-CTLA4)
				tremelimumab (anti-CTLA4)
ALK	NCT02393625	Study of Safety and Efficacy of Ceritinib in Combination With Nivolumab in Patients With ALK-positive Non-small Cell Lung Cancer	ALK-positive NSCLC	Ceritinib (LDK378)	3	2
				Nivolumab
ALK	NCT02422589	A Phase I, Multi-center, Open Label, Drug-drug Interaction Study to Assess the Effect of Ceritinib on the Pharmacokinetics of Warfarin and Midazolam in Patients With ALK-positive Advanced Tumors	ALK-positive Advanced Tumors	ceritinib	3	3
				warfarin
				midazolam
ALK	NCT02442414	A Phase 1 Study of KBP-5209 in Patients With Advanced Solid Tumors	Advanced Solid Tumors	KBP-5209	3	3
ALK	NCT02465060	NCI-MATCH: Targeted Therapy Directed by Genetic Testing in Treating Patients With Advanced Refractory Solid Tumors or Lymphomas	Advanced Malignant Neoplasm	Afatinib	3	835
			Lymphoma	Akt inhibitor AZD5363
			Refractory Malignant Neoplasm	Binimetinib
			Solid Neoplasm	Crizotinib
				Dabrafenib
				Dasatinib
				Defactinib
				FGFR Inhibitor AZD4547
				Osimertinib
				Palbociclib
				PI3K-beta Inhibitor GSK2636771
				Sunitinib Malate
				Taselisib
				Trametinib
				Vismodegib
ALK	NCT02511184	Crizotinib Plus Pembrolizumab In Alk-Positive Advanced Non Small Cell Lung Cancer Patients	ALK-positive Advanced NSCLC	Crizotinib	3	22
				Pembrolizumab
ALK	NCT02513667	Ceritinib in Combination With Stereotactic Ablative Radiation Metastatic Lung Adenocarcinoma	ALK-positive Non-small Cell Lung Cancer	Ceritinib	3	1
ALK	NCT02521051	Phase I/II Trial of Alectinib and Bevacizumab in Patients With Advanced, Anaplastic Lymphoma Kinase (ALK)-Positive, Non-Small Cell Lung Cancer	Non-Small Cell Lung Cancer (NSCLC)	Alectinib	3	2
				Bevacizumab
ALK	NCT02542293	Study of 1st Line Therapy Study of MEDI4736 With Tremelimumab Versus SoC in Non Small-Cell Lung Cancer (NSCLC) (NEPTUNE).	Non Small Cell Lung Carcinoma (NSCLC)	Paclitaxel + carboplatin	3	15
				Gemcitabine + cisplatin
				Gemcitabine + carboplatin
				Pemetrexed + cisplatin
				Pemetrexed + carboplatin
ALK	NCT02568267	Basket Study of Entrectinib (RXDX-101) for the Treatment of Patients With Solid Tumors Harboring NTRK1/2/3, ROS1, or ALK Gene Rearrangements (Fusions)	Adult Solid Tumor	Entrectinib	3	35
			Breast Cancer
			Cholangiocarcinoma
			Colorectal Cancer
			Head and Neck Neoplasms
			Lymphoma, Large-Cell, Anaplastic
			Melanoma
			Neuroendocrine Tumors
			Non-Small Cell Lung Cancer
			Ovarian Cancer
			Pancreatic Cancer
			Papillary Thyroid Cancer
			Primary Brain Tumors
			Renal Cell Carcinoma
			Salivary Gland Cancers
			Sarcomas
ALK	NCT02572453	AT13387 in Treating Patients With Relapsed or Refractory Anaplastic Large Cell Lymphoma, Mantle Cell Lymphoma, or Diffuse Large B-cell Lymphoma	Anaplastic Large Cell Lymphoma, ALK-Positive	Hsp90 Inhibitor AT13387	3	1
			Recurrent Anaplastic Large Cell Lymphoma
			Recurrent Diffuse Large B-Cell Lymphoma
			Recurrent Mantle Cell Lymphoma
			Refractory Anaplastic Large Cell Lymphoma
			Refractory Diffuse Large B-Cell Lymphoma
			Refractory Mantle Cell Lymphoma
ALK	NCT02584634	Study to Evaluate Safety, Efficacy, Pharmacokinetics And Pharmacodynamics Of Avelumab In Combination With Either Crizotinib Or PF-06463922 In Patients With NSCLC. (Javelin Lung 101)	Non-Small Cell Lung Cancer	Avelumab	3	10
				PF-06463922
				Crizotinib
ALK	NCT02605746	Preoperative Ceritinib (LDK378) in Glioblastoma Multiforme and CNS Metastasis	Brain Metastases	ceritinib 750mg	3	1
			Glioblastoma
ALK	NCT02638909	Study of Oral Ceritinib in Patients With ALK-Activated Gastrointestinal Malignancies	Cholangiocarcinoma	ceritinib	3	1
			Colorectal Adenocarcinoma
			Esophageal Adenocarcinoma
			Gastric Adenocarcinoma
			Hepatocellular Adenocarcinoma
			Pancreatic Adenocarcinoma
ALK	NCT02650401	Study of RXDX-101 in Children With Recurrent or Refractory Solid Tumors and Primary CNS Tumors	CNS Tumors	Entrectinib	3	1
			Neuroblastoma
			Solid Tumors
ALK	NCT02693535	TAPUR: Testing the Use of Food and Drug Administration (FDA) Approved Drugs That Target a Specific Abnormality in a Tumor Gene in People With Advanced Stage Cancer	Advanced Solid Tumors	Erlotinib	3	3
			Lymphoma, Non-Hodgkin	Axitinib
			Multiple Myeloma	Bosutinib
				Crizotinib
				Palbociclib
				Sunitinib
				Temsirolimus
				Trastuzumab and Pertuzumab
				Vemurafenib and Cobimetinib
				Vismodegib
				Cetuximab
				Dasatinib
				Regorafenib
				Olaparib
ALK	NCT02737501	ALTA-1L Study: A Phase 3 Study of Brigatinib Versus Crizotinib in ALK-positive Advanced Non-Small Cell Lung Cancer Patients	Advanced Malignancies	Brigatinib	3	1
			Carcinoma	Xalkori (crizotinib)
			Lung Cancer
			Non-small Cell Lung Cancer
ATM	NCT01837329	Phase I Study of Tetrathiomolybdate in Combination With Carboplatin/Pemetrexed in Metastatic Non-small Cell Lung Cancer	Non-Small Cell Lung Cancer	Tetrathiomolybdate	3	1
ATM	NCT01989546	Pilot Trial of BMN 673, an Oral PARP Inhibitor, in Patients With Advanced Solid Tumors and Deleterious BRCA Mutations	Advanced Breast Cancer	BMN 673	3	1
			Advanced Ovarian Cancer
			Advanced Solid Tumors
			Primary Peritoneal Cancer
ATM	NCT02264678	Ascending Doses of AZD6738 in Combination With Chemotherapy and/or Novel Anti Cancer Agents	Advanced Solid Malignancies, Head and Neck Squamous Cell Carinoma, and ATM Deficient NSCLC Adenocarcinoma, Gastric Cancer and Gastro-oesophageal Junction	Administration of AZD6738 in combination with carboplatin	3	2
				Administration of AZD6738 in combination with olaparib
				Administation of AZD6738 in combination with MEDI4736
				Administration of AZD6738
ATM	NCT02401347	Talazoparib Beyond BRCA (TBB) Trial	Advanced Breast Cancer	Talazoparib Tosylate	3	1
			HER2/Neu Negative
			Triple-Negative Breast Cancer
ATM	NCT02487095	Trial of Topotecan With VX-970, an ATR Kinase Inhibitor, in Small Cell Lung Cancer	Carcinoma, Neuroendocrine	Topotecan	3	1
			Carcinoma, Non-Small -Cell Lung	VX-970
			Ovarian Neoplasms
			Small Cell Lung Carcinoma
			Uterine Cervical Neoplasms
ATM	NCT02588105	Study to Assess the Safety and Preliminary Efficacy of AZD0156 at Increasing Doses Alone or in Combination With Other Anti-cancer Treatment in Patients With Advanced Cancer	Advanced Solid Tumours	AZD0156	3	1
				Olaparib
ATM	NCT02595879	Triapine With Chemotherapy and Radiation Therapy in Treating Patients With IB2-IVA Cervical or Vulvar Cancer	Cervical Adenocarcinoma	Cisplatin	3	1
			Cervical Adenosquamous Carcinoma	Triapine
			Cervical Squamous Cell Carcinoma
			Stage IB Vulvar Cancer
			Stage IB2 Cervical Cancer
			Stage II Vulvar Cancer
			Stage IIA1 Cervical Cancer
			Stage IIA2 Cervical Cancer
			Stage IIB Cervical Cancer
			Stage IIIA Cervical Cancer
			Stage IIIA Vulvar Cancer
			Stage IIIB Cervical Cancer
			Stage IIIB Vulvar Cancer
			Stage IIIC Vulvar Cancer
			Stage IVA Cervical Cancer
			Stage IVA Vulvar Cancer
			Vulvar Adenocarcinoma
			Vulvar Squamous Cell Carcinoma
ATM	NCT02693535	TAPUR: Testing the Use of Food and Drug Administration (FDA) Approved Drugs That Target a Specific Abnormality in a Tumor Gene in People With Advanced Stage Cancer	Advanced Solid Tumors	Erlotinib	3	3
			Lymphoma, Non-Hodgkin	Axitinib
			Multiple Myeloma	Bosutinib
				Crizotinib
				Palbociclib
				Sunitinib
				Temsirolimus
				Trastuzumab and Pertuzumab
				Vemurafenib and Cobimetinib
				Vismodegib
				Cetuximab
				Dasatinib
				Regorafenib
				Olaparib
AURKA	NCT01471964	Study to Assess Safety and Tolerability of MLN8237, In Combination With Erlotinib to Treat Non-Small Cell Lung Cancer	Non-small Cell Lung Cancer Metastatic	MLN8237 and Erlotinib	3	1
			Non-small Cell Lung Cancer Recurrent
AURKA	NCT01695941	Alisertib, Bortezomib, and Rituximab in Treating Patients With Relapsed or Refractory Mantle Cell Lymphoma or B-cell Low Grade Non-Hodgkin Lymphoma	Recurrent B-Cell Non-Hodgkin Lymphoma	Alisertib	3	3
			Recurrent Mantle Cell Lymphoma	Bortezomib
			Refractory B-Cell Non-Hodgkin Lymphoma
			Refractory Mantle Cell Lymphoma
AURKA	NCT01897012	Alisertib and Romidepsin in Treating Patients With Relapsed or Refractory B-Cell or T-Cell Lymphomas	Recurrent B-Cell Non-Hodgkin Lymphoma	Alisertib	3	1
			Recurrent Burkitt Lymphoma	Romidepsin
			Recurrent Diffuse Large B-Cell Lymphoma
			Recurrent Follicular Lymphoma
			Recurrent Hodgkin Lymphoma
			Recurrent Mantle Cell Lymphoma
			Recurrent Mature T- and NK-Cell Non-Hodgkin Lymphoma
			Refractory B-Cell Non-Hodgkin Lymphoma
			Refractory Burkitt Lymphoma
			Refractory Diffuse Large B-Cell Lymphoma
			Refractory Follicular Lymphoma
			Refractory Hodgkin Lymphoma
			Refractory Mantle Cell Lymphoma
			Refractory Mature T-Cell and NK-Cell Non-Hodgkin Lymphoma
AURKA	NCT01924260	Alisertib and Gemcitabine Hydrochloride in Treating Patients With Solid Tumors or Pancreatic Cancer	Acinar Cell Adenocarcinoma of the Pancreas	alisertib	3	1
			Duct Cell Adenocarcinoma of the Pancreas	gemcitabine
			Recurrent Pancreatic Cancer
			Stage III Pancreatic Cancer
			Stage IV Pancreatic Cancer
			Unspecified Adult Solid Tumor, Protocol Specific
AURKA	NCT02114229	Phase 2 Study of Alisertib Therapy for Rhabdoid Tumors	Atypical Teratoid Rhabdoid Tumor	alisertib	3	7
			Malignant Rhabdoid Tumor	methotrexate
				cisplatin
				carboplatin
				cyclophosphamide
				etoposide
				topotecan
				vincristine
AURKA	NCT02134067	Dose-escalating, Safety, Tolerability and PK Study of TAS-119 in Combination With Paclitaxel in Patients With Advanced Solid Tumors	Advanced Solid Tumors	TAS-119	3	2
				Paclitaxel
AURKA	NCT02187991	Study to Compare Alisertib With Paclitaxel vs. Paclitaxel Alone in Metastatic or Locally Recurrent Breast Cancer	Breast Cancer	Paclitaxel	3	1
			Breast Carcinoma	Alisertib
			Breast Tumors
			Malignant Neoplasm of Breast
AURKA	NCT02293005	Phase II Trial of Alisertib (MLN8237) in Salvage Malignant Mesothelioma	Lung Cancer	Alisertib	3	1
			Mesothelioma
AURKA	NCT02319018	Alisertib and Combination Chemotherapy in Treating Patients With Gastrointestinal Tumors	Malignant Digestive System Neoplasm	Alisertib	3	5
				Fluorouracil
				Leucovorin Calcium
				Oxaliplatin
AURKA	NCT02327169	A Phase 1B Study of MLN2480 in Combination With MLN0128 or Alisertib, or Paclitaxel, or Cetuximab, or Irinotecan in Adult Patients With Advanced Nonhematologic Malignancies	Advanced Nonhematologic Malignancies	MLN2480	3	2
				MLN0128
				Alisertib
				Paclitaxel
				Cetuximab
				Irinotecan
AURKA	NCT02530619	Alisertib in Treating Patients With Myelofibrosis or Relapsed or Refractory Acute Megakaryoblastic Leukemia	Acute Megakaryoblastic Leukemia	Alisertib	3	1
			Myelofibrosis
			Primary Myelofibrosis
AURKA	NCT02719691	Phase I Study of MLN0128 and MLN8237 in Patients With Advanced Solid Tumors and Metastatic Triple-negative Breast Cancer	Metastatic Breast Cancer	Alisertib	3	1
			Solid Tumors	MLN0128
BCL2	NCT01303341	Riluzole and Sorafenib Tosylate in Treating Patients With Advanced Solid Tumors or Melanoma	Adult Solid Neoplasm	Riluzole	6	1
			Recurrent Melanoma	Sorafenib Tosylate
			Stage IIIA Skin Melanoma
			Stage IIIB Skin Melanoma
			Stage IIIC Skin Melanoma
BCL2	NCT02079740	Trametinib and Navitoclax in Treating Patients With Advanced or Metastatic Solid Tumors	Extensive Stage Small Cell Lung Carcinoma	Trametinib	6	2
			Recurrent Colorectal Carcinoma
			Recurrent Non-Small Cell Lung Carcinoma
			Recurrent Pancreatic Carcinoma
			Recurrent Small Cell Lung Carcinoma
			Solid Neoplasm
			Stage III Pancreatic Cancer
			Stage IIIA Colorectal Cancer
			Stage IIIA Non-Small Cell Lung Cancer
			Stage IIIB Colorectal Cancer
			Stage IIIB Non-Small Cell Lung Cancer
			Stage IIIC Colorectal Cancer
			Stage IV Non-Small Cell Lung Cancer
			Stage IV Pancreatic Cancer
			Stage IVA Colorectal Cancer
			Stage IVB Colorectal Cancer
BCL2	NCT02143401	Navitoclax and Sorafenib Tosylate in Treating Patients With Relapsed or Refractory Solid Tumors	Recurrent Hepatocellular Carcinoma	Sorafenib Tosylate	6	3
			Solid Neoplasm
			Stage IV Hepatocellular Carcinoma
BCL2	NCT02226965	PNT2258 for Treatment of Patients With r/r DLBCL (Wolverine)	Lymphoma, Diffuse Large B-Cell	PNT2258	6	25
BCL2	NCT02419560	Optimal Dose Finding Study ABT-199 and Ibrutinib in MCL	Lymphoma, Mantle-Cell	ABT-199 and Ibrutinib Combination	6	2
			Recurrent Lymphoma, Mantle-Cell
BCL2	NCT02427451	Bcl-2 Inhibitor GDC-0199 in Combination With Obinutuzumab and Ibrutinib in Treating Patients With Relapsed, Refractory, or Previously Untreated Chronic Lymphocytic Leukemia	Chronic Lymphocytic Leukemia	Bcl-2 Inhibitor GDC-0199	6	1
			Refractory Chronic Lymphocytic Leukemia	Ibrutinib
BCL2	NCT02520778	EGFR Inhibitor AZD9291 and Navitoclax in Treating Patients With EGFR-Positive Previously Treated Advanced or Metastatic Non-small Cell Lung Cancer	Recurrent Non-Small Cell Lung Carcinoma	Navitoclax	6	3
			Stage IIIA Non-Small Cell Lung Cancer	Osimertinib
			Stage IIIB Non-Small Cell Lung Cancer
			Stage IV Non-Small Cell Lung Cancer
BCL2	NCT02640833	A Study of Duvelisib and Venetoclax in Subjects With Relapsed or Refractory Chronic Lymphocytic Leukemia, Small Lymphocytic Lymphoma, or Indolent or Aggressive Non-Hodgkin Lymphoma, Who Have Not Previously Received a Bcl-2 or PI3K Inhibitor	Chronic Lymphocytic Leukemia	Duvelisib	6	6
			Non-Hodgkin Lymphoma	Venetoclax
			Small Lymphocytic Lymphoma
BCL2	NCT02674750	Study to Evaluate the Efficacy and Safety of CUDC-907 With and Without Rituximab in Patients With RR MYC-Altered DLBCL	Relapsed and/or Refractory Diffuse Large B-cell Lymphoma	CUDC-907	6	3
				Rituximab
BCL2	NCT02677324	Study of ABT-199 (GDC-199) In Patients With Relapsed Or Refractory Waldenstr√∂m Macroglobulinemia	Waldenstrom Macroglobulinemia	ABT199	6	1
BCL6	NCT01943851	A Dose Escalation Study to Investigate the Safety, Pharmacokinetics (PK), Pharmacodynamics (PD) and Clinical Activity of GSK525762 in Subjects With Relapsed, Refractory Hematologic Malignancies	Cancer	GSK525762	0	2
BCL6	NCT02572453	AT13387 in Treating Patients With Relapsed or Refractory Anaplastic Large Cell Lymphoma, Mantle Cell Lymphoma, or Diffuse Large B-cell Lymphoma	Anaplastic Large Cell Lymphoma, ALK-Positive	Hsp90 Inhibitor AT13387	0	1
			Recurrent Anaplastic Large Cell Lymphoma
			Recurrent Diffuse Large B-Cell Lymphoma
			Recurrent Mantle Cell Lymphoma
			Refractory Anaplastic Large Cell Lymphoma
			Refractory Diffuse Large B-Cell Lymphoma
			Refractory Mantle Cell Lymphoma
BCL6	NCT02674750	Study to Evaluate the Efficacy and Safety of CUDC-907 With and Without Rituximab in Patients With RR MYC-Altered DLBCL	Relapsed and/or Refractory Diffuse Large B-cell Lymphoma	CUDC-907	0	3
				Rituximab
BCR	NCT00176930	Stem Cell Transplant for Hematological Malignancy	AML	Cyclophosphamide	2	1
			Hodgkin's Disease	Busulfan
			JMML
			Leukemia, Lymphocytic, Acute
			Leukemia, Lymphocytic, Chronic
			Leukemia, Myeloid, Chronic
			MDS
			Multiple Myeloma
			Non-hodgkin's Lymphoma
BCR	NCT00255684	Fludarabine, Cyclophosphamide, and Total-Body Irradiation Followed by Cyclosporine and Mycophenolate Mofetil in Treating Patients Who Are Undergoing a Donor Umbilical Cord Blood Transplant for Hematologic Cancer	Chronic Myeloproliferative Disorders	cyclophosphamide	2	1
			Graft Versus Host Disease	cyclosporine
			Leukemia	fludarabine phosphate
			Lymphoma	mycophenolate mofetil
			Multiple Myeloma and Plasma Cell Neoplasm
			Myelodysplastic Syndromes
			Myelodysplastic/Myeloproliferative Neoplasms
BCR	NCT00309842	Myeloablative Umbilical Cord Blood Transplantation in Hematological Diseases	Acute Lymphocytic Leukemia	cyclophosphamide	2	1
			Acute Myeloid Leukemia	cyclosporine
			Chronic Lymphocytic Leukemia	fludarabine phosphate
			Chronic Myelogenous Leukemia	mycophenolate mofetil
			Leukemia
			Lymphoma
			MDS
			Multiple Myeloma
			Myelodysplastic Syndromes
			Myelofibrosis
			Non-Hodgkin's Lymphoma
			Prolymphocytic Leukemia
			Refractory Anemia
BCR	NCT00368355	T Cell Depletion for Recipients of HLA Haploidentical Related Donor Stem Cell Grafts	Acute Lymphoblastic Leukemia	Ara-C	2	2
			Acute Myeloid Leukemia	Cyclophosphamide
			Chronic Myelogenous Leukemia
			Familial Hemophagocytic Lymphohistiocytosis (FLH)
			Hemophagocytic Lymphohistiocytosis (HLH)
			Myelodysplastic Syndrome
			Non Hodgkins Lymphoma
			Viral-associated Hemophagocytic Syndrome (VAHS)
			X-linked Lymphoproliferative Disease (XLP)
BCR	NCT00397813	Fludarabine Phosphate and Total Body Irradiation Followed by a Donor Peripheral Stem Cell Transplant in Treating Patients With Myelodysplastic Syndromes or Myeloproliferative Disorders	Atypical Chronic Myeloid Leukemia, BCR-ABL1 Negative	Cyclosporine	2	3
			Chronic Myelomonocytic Leukemia	Fludarabine Phosphate
			Essential Thrombocythemia	Mycophenolate Mofetil
			Myeloproliferative Neoplasm
			Paroxysmal Nocturnal Hemoglobinuria
			Polycythemia Vera
			Polycythemia Vera, Post-Polycythemic Myelofibrosis Phase
			Primary Myelofibrosis
			Refractory Anemia
			Refractory Anemia With Excess Blasts
			Refractory Anemia With Ring Sideroblasts
			Refractory Cytopenia With Multilineage Dysplasia
			Refractory Cytopenia With Multilineage Dysplasia and Ring Sideroblasts
			de Novo Myelodysplastic Syndrome
BCR	NCT00619879	Myeloablative Hematopoietic Progenitor Cell Transplantation (HPCT) for Pediatric Malignancies	Leukemia, Lymphoblastic, Acute	Myeloablative Chemotherapy Regimen for Lymphoid Malignancies or Cord Blood Unit Recipients	2	1
			Leukemia, Myelogenous, Acute	Myeloablative Chemotherapy Regimen for Non-Cord Blood Unit Recipients with Myeloid Malignancies
			Leukemia, Myelogenous, Chronic
			Lymphoma, Malignant
			Myeloproliferative-Myelodysplastic Diseases
BCR	NCT00718263	Efficacy and Safety of Nilotinib Patients With Newly Diagnosed CML - CP (Chronic Myelogenous Leukemia - Chronic Phase)	Myelogenous Leukemia, Chronic	Nilotinib	2	1
				Imatinib
BCR	NCT00719888	Umbilical Cord Blood Transplant, Cyclophosphamide, Fludarabine Phosphate, and Total-Body Irradiation in Treating Patients With Hematologic Disease	Acute Biphenotypic Leukemia	Cyclophosphamide	2	2
			Acute Myeloid Leukemia Arising From Previous Myelodysplastic Syndrome	Cyclosporine
			Acute Myeloid Leukemia in Remission	Fludarabine Phosphate
			Adult Acute Lymphoblastic Leukemia in Complete Remission	Mycophenolate Mofetil
			Aggressive Non-Hodgkin Lymphoma
			B Acute Lymphoblastic Leukemia With t(1;19)(q23;p13.3); E2A-PBX1 (TCF3-PBX1)
			B Acute Lymphoblastic Leukemia With t(9;22)(q34;q11.2); BCR-ABL1
			Burkitt Lymphoma
			Childhood Acute Lymphoblastic Leukemia in Complete Remission
			Chronic Phase Chronic Myelogenous Leukemia, BCR-ABL1 Positive
			Lymphoblastic Lymphoma
			Mantle Cell Lymphoma
			Myelofibrosis
			Pancytopenia
			Plasma Cell Myeloma
			Prolymphocytic Leukemia
			Recurrent Childhood Acute Myeloid Leukemia
			Recurrent Chronic Lymphocytic Leukemia
			Recurrent Chronic Myelogenous Leukemia, BCR-ABL1 Positive
			Recurrent Follicular Lymphoma
			Recurrent Lymphoplasmacytic Lymphoma
			Recurrent Marginal Zone Lymphoma
			Recurrent Small Lymphocytic Lymphoma
			Refractory Anemia With Excess Blasts
BCR	NCT00720785	Natural Killer Cells and Bortezomib to Treat Cancer	CLL	NK cells +CliniMACs CD3 and CD56 systems	2	1
			Colorectal or Kidney Neoplasms
			Leukemia, Myelogenous, Chronic Lymphocytic Leukemia, BCR-ABL Positive
			Lung or Prostatic Neoplasms
			Melanoma
			Pancreatic Neoplasms
BCR	NCT00723099	Donor Umbilical Cord Blood Transplant in Treating Patients With Hematologic Cancer	Acute Biphenotypic Leukemia	Cyclophosphamide	2	4
			Acute Lymphoblastic Leukemia	Cyclosporine
			Acute Myeloid Leukemia	Fludarabine Phosphate
			Aggressive Non-Hodgkin Lymphoma	Mycophenolate Mofetil
			Chronic Myelogenous Leukemia, BCR-ABL1 Positive
			Chronic Phase Chronic Myelogenous Leukemia, BCR-ABL1 Positive
			Indolent Non-Hodgkin Lymphoma
			Malignant Lymphoma, Large Cell Type
			Mixed Phenotype Acute Leukemia
			Myelodysplastic Syndrome
			Myeloproliferative Neoplasm
			Recurrent Chronic Lymphocytic Leukemia
			Recurrent Follicular Lymphoma
			Recurrent Lymphoplasmacytic Lymphoma
			Recurrent Mantle Cell Lymphoma
			Recurrent Marginal Zone Lymphoma
			Recurrent Plasma Cell Myeloma
			Recurrent Small Lymphocytic Lymphoma
			Recurrent T-Cell Non-Hodgkin Lymphoma
			Refractory Chronic Lymphocytic Leukemia
			Refractory Chronic Myelogenous Leukemia, BCR-ABL1 Positive
			Refractory Follicular Lymphoma
			Refractory Hodgkin Lymphoma
			Refractory Lymphoplasmacytic Lymphoma
			Refractory Mantle Cell Lymphoma
			Refractory Small Lymphocytic Lymphoma
			T-Cell Non-Hodgkin Lymphoma
BCR	NCT00796068	Treosulfan, Fludarabine Phosphate, and Total-Body Irradiation in Treating Patients With Hematological Cancer Who Are Undergoing Umbilical Cord Blood Transplant	Acute Biphenotypic Leukemia	Cyclosporine	2	1
			Adult Acute Lymphoblastic Leukemia in Remission	Fludarabine Phosphate
			Adult Acute Myeloid Leukemia in Remission	Mycophenolate Mofetil
			Adult Myelodysplastic Syndrome	Treosulfan
			Childhood Acute Lymphoblastic Leukemia in Remission
			Childhood Acute Myeloid Leukemia in Remission
			Childhood Chronic Myelogenous Leukemia, BCR-ABL1 Positive
			Childhood Myelodysplastic Syndrome
			Chronic Phase Chronic Myelogenous Leukemia, BCR-ABL1 Positive
			Recurrent Chronic Myelogenous Leukemia, BCR-ABL1 Positive
			Refractory Anemia With Excess Blasts
			Refractory Chronic Myelogenous Leukemia, BCR-ABL1 Positive
BCR	NCT01190930	Risk-Adapted Chemotherapy in Treating Younger Patients With Newly Diagnosed Standard-Risk Acute Lymphoblastic Leukemia or Localized B-Lineage Lymphoblastic Lymphoma	Adult B Lymphoblastic Lymphoma	Cyclophosphamide	2	179
			Childhood B Acute Lymphoblastic Leukemia	Cytarabine
			Childhood B Acute Lymphoblastic Leukemia With t(9;22)(q34;q11.2); BCR-ABL1	Dexamethasone
			Childhood B Lymphoblastic Lymphoma	Doxorubicin Hydrochloride
			Down Syndrome	Leucovorin Calcium
			Stage I B Lymphoblastic Lymphoma	Mercaptopurine
			Stage II B Lymphoblastic Lymphoma	Methotrexate
			Untreated Adult Acute Lymphoblastic Leukemia	Pegaspargase
			Untreated Childhood Acute Lymphoblastic Leukemia	Thioguanine
				Vincristine Sulfate
BCR	NCT01231412	Graft-Versus-Host Disease Prophylaxis in Treating Patients With Hematologic Malignancies Undergoing Unrelated Donor Peripheral Blood Stem Cell Transplant	Acute Lymphoblastic Leukemia	Cyclosporine	2	5
			Acute Myeloid Leukemia	Fludarabine Phosphate
			Aggressive Non-Hodgkin Lymphoma	Mycophenolate Mofetil
			Chronic Lymphocytic Leukemia	Sirolimus
			Diffuse Large B-Cell Lymphoma
			Hematopoietic and Lymphoid Cell Neoplasm
			Indolent Non-Hodgkin Lymphoma
			Mantle Cell Lymphoma
			Myelodysplastic Syndrome
			Myeloproliferative Neoplasm
			Prolymphocytic Leukemia
			Recurrent Chronic Lymphocytic Leukemia
			Recurrent Plasma Cell Myeloma
			Refractory Chronic Lymphocytic Leukemia
			Refractory Chronic Myelogenous Leukemia, BCR-ABL1 Positive
			Refractory Hodgkin Lymphoma
			Small Lymphocytic Lymphoma
			T-Cell Chronic Lymphocytic Leukemia
			Waldenstrom Macroglobulinemia
BCR	NCT01251575	Sirolimus, Cyclosporine, and Mycophenolate Mofetil in Preventing Graft-versus-Host Disease in Treating Patients With Hematologic Malignancies Undergoing Donor Peripheral Blood Stem Cell Transplant	Adult Acute Lymphoblastic Leukemia	Cyclosporine	2	3
			Adult Acute Myeloid Leukemia	Fludarabine Phosphate
			Adult Diffuse Large B-Cell Lymphoma	Mycophenolate Mofetil
			Adult Myelodysplastic Syndrome	Sirolimus
			Adult Non-Hodgkin Lymphoma
			Aggressive Non-Hodgkin Lymphoma
			Childhood Acute Lymphoblastic Leukemia
			Childhood Acute Myeloid Leukemia
			Childhood Diffuse Large B -Cell Lymphoma
			Childhood Myelodysplastic Syndrome
			Childhood Non-Hodgkin Lymphoma
			Chronic Lymphocytic Leukemia
			Chronic Lymphocytic Leukemia in Remission
			Chronic Phase Chronic Myelogenous Leukemia, BCR-ABL1 Positive
			Hematopoietic and Lymphoid Cell Neoplasm
			Mantle Cell Lymphoma
			Plasma Cell Myeloma
			Prolymphocytic Leukemia
			Recurrent Chronic Lymphocytic Leukemia
			Recurrent Diffuse Large B-Cell Lymphoma
			Recurrent Hodgkin Lymphoma
			Refractory Chronic Lymphocytic Leukemia
			T-Cell Chronic Lymphocytic Leukemia
			T-Cell Prolymphocytic Leukemia
			Waldenstrom Macroglobulinemia
BCR	NCT01366612	PRO#1278: Fludarabine and Busulfan vs. Fludarabine, Busulfan and Total Body Irradiation	Acute Myelogenous Leukemia	Fludarabine and Busulfan plus/minus Total Body Irradiation (low dose)	2	1
			Chronic Myelogenous Leukemia	Fludarabine and Busulfan + Low Dose Total Body Irradiation (LD TBI)
			Myelodysplastic Syndrome
			Myeloid Malignancies
			Myeloproliferative Disorders
BCR	NCT01397734	Arsenic Trioxide and Tyrosine Kinase Inhibitors for Chronic Myelogenous Leukemia (CML)	Chronic Myelogenous Leukemia	Arsenic trioxide	2	1
BCR	NCT01424982	Hyper-CVAD and Ponatinib in Ph-Positive and/or BCR-ABL Positive Acute Lymphoblastic Leukemia (ALL)	Leukemia	Cyclophosphamide	2	1
				Mesna
				Doxorubicin
				Vincristine
				Dexamethasone
				Ponatinib
				G-CSF (Filgrastim)
				Rituximab
				Methotrexate
				Cytarabine
				Solu-medrol ( Methyl Prednisolone)
				Citrovorum (Leucovorin)
				Prednisone
				Pegfilgrastim (Neulasta)
BCR	NCT01428635	Eltrombopag for the Management of Thrombocytopenia Associated With Tyrosine Kinase Therapy in Patients With Chronic Myeloid Leukemia (CML)	Leukemia	Eltrombopag	2	1
BCR	NCT01498445	An Open-Label, Phase I/II Study of Two Different Schedules of Dasatinib (Sprycel) and Decitabine (Dacogen) Used in Combination for Patients With Accelerated or Blastic Phase Chronic Myelogenous Leukemia (Protocol CA180357)	Leukemia	Dasatinib	2	1
				Decitabine
				Decitabine
BCR	NCT01513603	Trial of Cladribine, Cytarabine, Mitoxantrone, Filgrastim (CLAG-M) in Relapsed Acute Lymphoblastic Leukemia	Acute Lymphoblastic Leukemia	CLAG-M	2	1
			Burkitts Leukemia/Lymphoma	CLAG-M
			Chronic Myelogenous Leukemia
			Lymphoblastic Lymphoma
BCR	NCT01593254	Open Label, Randomized Phase 2b Study of Dasatinib vs Imatinib in Patients With Chronic Myeloid Leukemia (CML) Who do Not Have Favorable Imatinib Response (DASCERN)	Chronic Phase Chronic Myeloid Leukemia	Imatinib	2	13
				Dasatinib
BCR	NCT01621477	T-Cell Replete Haploidentical Donor Hematopoietic Stem Cell Plus Natural Killer (NK) Cell Transplantation in Patients With Hematologic Malignancies Relapsed or Refractory Despite Previous Allogeneic Transplant	Acute Lymphoblastic Leukemia	clofarabine	2	1
			Acute Myelocytic Leukemia	cytarabine
			Chronic Myelocytic Leukemia	busulfan
			Hodgkin or Non-Hodgkin Lymphoma	Plerixafor
			Juvenile Myelomonocytic Leukemia	cyclophosphamide
			Myelodysplastic Syndrome	antithymocyte globulin (rabbit)
			Sarcoma, Myeloid	Tacrolimus
				mycophenolate mofetil
BCR	NCT01690520	Donor Umbilical Cord Blood Transplant With or Without Ex-vivo Expanded Cord Blood Progenitor Cells in Treating Patients With Acute Myeloid Leukemia, Acute Lymphoblastic Leukemia, Chronic Myelogenous Leukemia, or Myelodysplastic Syndromes	Acute Biphenotypic Leukemia	Cyclophosphamide	2	6
			Acute Lymphoblastic Leukemia in Remission	Cyclosporine
			Acute Myeloid Leukemia Arising From Previous Myelodysplastic Syndrome	Fludarabine Phosphate
			Acute Myeloid Leukemia in Remission	Mycophenolate Mofetil
			Chronic Myelogenous Leukemia, BCR-ABL1 Positive
			Mixed Phenotype Acute Leukemia
			Myelodysplastic Syndrome
			Pancytopenia
			Refractory Anemia
			Refractory Anemia With Excess Blasts
			Refractory Anemia With Excess Blasts in Transformation
			Secondary Acute Myeloid Leukemia
BCR	NCT01702064	Ruxolitinib in Combination With Nilotinib in Chronic Myeloid Leukemia (CML) Patients	Chronic Phase Chronic Myeloid Leukemia	Nilotinib	2	1
				Ruxolitinib
BCR	NCT01720264	Multicenter Phase II of CD26 Using Sitagliptin for Engraftment After UBC Transplant	Acute Lymphoid Leukemia	Sitagliptin	2	1
			Acute Myeloid Leukemia
			Hematopoetic Myelodysplasia
			Leukemia, Myelogenous, Chronic
			Lymphoma, Non-Hodgkin
BCR	NCT01751425	Ruxolitinib for Chronic Myeloid Leukemia (CML) With Minimal Residual Disease (MRD)	Leukemia	Ruxolitinib	2	1
				TKI
BCR	NCT01760655	Reduced-Intensity Conditioning Before Donor Stem Cell Transplant in Treating Patients With High-Risk Hematologic Malignancies	Accelerated Phase Chronic Myelogenous Leukemia	Fludarabine phosphate	2	1
			Adult Acute Lymphoblastic Leukemia in Remission	Thiotepa
			Adult Acute Myeloid Leukemia With 11q23 (MLL) Abnormalities	Cyclophosphamide
			Adult Acute Myeloid Leukemia With Del(5q)	Tacrolimus
			Adult Nasal Type Extranodal NK/T-cell Lymphoma	Mycophenolate mofetil
			Anaplastic Large Cell Lymphoma
			Angioimmunoblastic T-cell Lymphoma
			Blastic Phase Chronic Myelogenous Leukemia
			Childhood Acute Lymphoblastic Leukemia in Remission
			Childhood Burkitt Lymphoma
			Childhood Chronic Myelogenous Leukemia
			Childhood Diffuse Large Cell Lymphoma
			Childhood Immunoblastic Large Cell Lymphoma
			Childhood Myelodysplastic Syndromes
			Childhood Nasal Type Extranodal NK/T-cell Lymphoma
			Chronic Myelomonocytic Leukemia
			Chronic Phase Chronic Myelogenous Leukemia
			Cutaneous B-cell Non-Hodgkin Lymphoma
			Essential Thrombocythemia
			Extranodal Marginal Zone B-cell Lymphoma of Mucosa-associated Lymphoid Tissue
			Hepatosplenic T-cell Lymphoma
			Intraocular Lymphoma
			Juvenile Myelomonocytic Leukemia
			Nodal Marginal Zone B-cell Lymphoma
			Noncutaneous Extranodal Lymphoma
			Peripheral T-cell Lymphoma
			Polycythemia Vera
			Post-transplant Lymphoproliferative Disorder
			Previously Treated Myelodysplastic Syndromes
			Primary Myelofibrosis
			Recurrent Adult Acute Myeloid Leukemia
			Recurrent Adult Burkitt Lymphoma
			Recurrent Adult Diffuse Large Cell Lymphoma
			Recurrent Adult Diffuse Mixed Cell Lymphoma
			Recurrent Adult Diffuse Small Cleaved Cell Lymphoma
			Recurrent Adult Grade III Lymphomatoid Granulomatosis
			Recurrent Adult Hodgkin Lymphoma
			Recurrent Adult Immunoblastic Large Cell Lymphoma
			Recurrent Adult Lymphoblastic Lymphoma
			Recurrent Adult T-cell Leukemia/Lymphoma
			Recurrent Childhood Acute Myeloid Leukemia
			Recurrent Childhood Anaplastic Large Cell Lymphoma
			Recurrent Childhood Grade III Lymphomatoid Granulomatosis
			Recurrent Childhood Large Cell Lymphoma
			Recurrent Childhood Lymphoblastic Lymphoma
			Recurrent Childhood Small Noncleaved Cell Lymphoma
			Recurrent Cutaneous T-cell Non-Hodgkin Lymphoma
			Recurrent Grade 1 Follicular Lymphoma
			Recurrent Grade 2 Follicular Lymphoma
			Recurrent Grade 3 Follicular Lymphoma
			Recurrent Mantle Cell Lymphoma
			Recurrent Marginal Zone Lymphoma
			Recurrent Mycosis Fungoides/Sezary Syndrome
			Recurrent Small Lymphocytic Lymphoma
			Recurrent/Refractory Childhood Hodgkin Lymphoma
			Refractory Anemia With Excess Blasts
			Refractory Anemia With Excess Blasts in Transformation
			Refractory Cytopenia With Multilineage Dysplasia
			Refractory Hairy Cell Leukemia
			Refractory Multiple Myeloma
			Relapsing Chronic Myelogenous Leukemia
			Secondary Acute Myeloid Leukemia
			Small Intestine Lymphoma
			Splenic Marginal Zone Lymphoma
			T-cell Large Granular Lymphocyte Leukemia
			Testicular Lymphoma
			Waldenstr√∂m Macroglobulinemia
			de Novo Myelodysplastic Syndromes
BCR	NCT01799889	Entospletinib in Adults With Relapsed or Refractory Hematologic Malignancies	Chronic Lymphocytic Leukemia	Entospletinib	2	57
			Diffuse Large B-cell Lymphoma	Entospletinib SDD
			Follicular Lymphoma
			Mantle Cell Lymphoma
			Non-FL Indolent Non-Hodgkin's Lymphoma
BCR	NCT01850004	Open-Label Study Evaluating Dasatinib Therapy Discontinuation in Patients With Chronic Phase Chronic Myeloid Leukemia With Stable Complete Molecular Response	Chronic Phase Chronic Myeloid Leukemia	Dasatinib	2	6
BCR	NCT01858740	Selective Depletion of CD45RA+ T Cells From Allogeneic Peripheral Blood Stem Cell Grafts for the Prevention of GVHD in Children	Accelerated Phase Chronic Myelogenous Leukemia, BCR-ABL1 Positive	Fludarabine Phosphate	2	1
			Acute Biphenotypic Leukemia	Methotrexate
			Acute Leukemia of Ambiguous Lineage	Tacrolimus
			Acute Undifferentiated Leukemia	Thiotepa
			Blast Phase Chronic Myelogenous Leukemia, BCR-ABL1 Positive
			Childhood Acute Lymphoblastic Leukemia in Remission
			Childhood Acute Myeloid Leukemia in Remission
			Childhood Chronic Myelogenous Leukemia, BCR-ABL1 Positive
			Recurrent Childhood Acute Lymphoblastic Leukemia
			Recurrent Childhood Acute Myeloid Leukemia
			Refractory Anemia With Excess Blasts
BCR	NCT01871311	A Phase I Study of Nilontinib and Cetuximab in Patients With Solid Tumors	Colorectal Cancer	Nilotinib + Cetuximab	2	1
			Head and Neck Cancer
BCR	NCT01951885	Tac, Mini-MTX, MMF Versus Tac, MTX for GVHD Prevention	Acute Biphenotypic Leukemia	tacrolimus	2	1
			Acute Lymphoblastic Leukemia	methotrexate
			Acute Myeloid Leukemia	Mycophenolate mofetil
			Chronic Lymphocytic Leukemia	Methotrexate (low dose)
			Chronic Myelogenous Leukemia
			Hodgkins Disease
			Multiple Myeloma
			Myelodysplastic Syndrome
			Myeloproliferative Neoplasm
			Non-Hodgkin Lymphoma
BCR	NCT02000934	A Study of TAK-659 in Adult Patients With Advanced Solid Tumor and Lymphoma Malignancies	Advanced Solid Tumor and Lymphoma Malignancies	TAK-659	2	4
BCR	NCT02003222	Combination Chemotherapy With or Without Blinatumomab in Treating Patients With Newly Diagnosed BCR-ABL-Negative B Lineage Acute Lymphoblastic Leukemia	Adult B Acute Lymphoblastic Leukemia	Cyclophosphamide	2	303
			Untreated Adult Acute Lymphoblastic Leukemia	Cytarabine
				Daunorubicin Hydrochloride
				Dexamethasone
				Etoposide
				Mercaptopurine
				Methotrexate
				Pegaspargase
				Prednisone
				Vincristine Sulfate
BCR	NCT02011945	A Phase 1B Study to Investigate the Safety and Preliminary Efficacy for the Combination of Dasatinib Plus Nivolumab in Patients With Chronic Myeloid Leukemia	Chronic Myeloid Leukemia	Dasatinib	2	4
				Nivolumab
BCR	NCT02043587	Chemotherapy With Liposomal Cytarabine CNS Prophylaxis for Adult Acute Lymphoblastic Leukemia & Lymphoblastic Lymphoma	Acute Lymphocytic Leukemia	DNR	2	4
			Adult Lymphoblastic Lymphoma	VCR
				PEG-asp
				CTX
				Prednisone
				Liposomal AraC
				MTX
				LCV
				AraC
				Etoposide
				Dasatinib
				Rituximab
				Hydrocortisone
BCR	NCT02047149	Evaluating the Safety of Zileuton (Zyflo¬Æ) in Combination With Dasatinib (Sprycel¬Æ) in Chronic Myelogenous Leukemia	Chronic Myelogenous Leukemia	Zileuton (Zyflo¬Æ) Dasatinib (Sprycel¬Æ)	2	1
				Dosing with Zileuton/Dasatinib in CML
				Daily dosing of Zileuton/Dasatinib
				Daily dosing with Zileuton/Dasatinib for CML
BCR	NCT02061800	CD34+ (Malignant) Stem Cell Selection for Patients Receiving Allogenic Stem Cell Transplant	Acute Lymphoblastic Leukemia (ALL);	Thiotepa	2	1
			Acute Myelogenous Leukemia (AML);	Cyclophosphamide
			Chronic Myeloid Leukemia (CML)	Alemtuzumab
			Juvenile Myelomonocytic Leukemia (JMML);	Tacrolimus
			Lymphoma (Hodgkin's and Non-Hodgkin's)	Melphalan
			Myelodysplastic Syndrome (MDS);	Busulfan
				Fludarabine
				Methylprednisolone
BCR	NCT02078960	A Study to Evaluate the Pharmacokinetics, Safety,and Efficacy of Omacetaxine Given Subcutaneously as a Fixed Dose in Patients With Chronic Phase (CP) or Accelerated Phase (AP) Chronic Myeloid Leukemia (CML) (Referred to as the SYNSINCT Study)	Chronic Myeloid Leukemia	Omacetaxine mepesuccinate	2	3
BCR	NCT02081378	A Phase I Study of Oral ABL001 in Patients With CML or Ph+ ALL	Chronic Myelogenous Leukemia	ABL001	2	5
			Philadelphia Chromosome-positive Acute Lymphoblastic Leukemia	ABL001 + Nilotinib
				ABL001
				ABL001+imatinib
				ABL001+dasatinib
BCR	NCT02091245	Phase I Trial of the Selective Inhibitor of Nuclear Export, KPT-330, in Relapsed Childhood ALL and AML	Chronic Myelogenous Leukemia (CML) in Blast Crisis	KPT-330	2	8
			Refractory Acute Lymphoblastic Leukemia (ALL)
			Refractory Acute Myelogenous Leukemia (AML)
			Refractory Biphenotypic Leukemia
			Refractory Mixed Lineage Leukemia
			Relapsed Acute Lymphoblastic Leukemia (ALL)
			Relapsed Acute Myelogenous Leukemia (AML)
			Relapsed Biphenotypic Leukemia
			Relapsed Mixed Lineage Leukemia
BCR	NCT02092324	Ruxolitinib Phosphate in Treating Patients With Chronic Neutrophilic Leukemia or Atypical Chronic Myeloid Leukemia	Atypical Chronic Myeloid Leukemia, BCR-ABL1 Negative	Ruxolitinib Phosphate	2	7
			Chronic Neutrophilic Leukemia
BCR	NCT02115295	Cladribine Plus Idarubicin Plus Cytarabine (ARAC) in Patients With Acute Myeloid Leukemia (AML), High Risk Myelodysplastic Syndrome (HR MDS) or Myeloid Blast Phase of Chronic Myeloid Leukemia (CML)	Leukemia	Cladribine	2	1
				Cytarabine
				Idarubicin
BCR	NCT02129582	Targeted Marrow Irradiation, Fludarabine Phosphate, and Busulfan Before Donor Progenitor Cell Transplant in Treating Patients With Hematologic Malignancies	Acute Lymphocytic Leukemia	fludarabine phosphate	2	1
			Acute Myeloid Leukemia	busulfan
			Chronic Lymphocytic Leukemia	tacrolimus
			Chronic Myeloid Leukemia	methotrexate
			Hematologic Malignancies
			Hodgkin Lymphoma,
			Multiple Myeloma
			Myelodysplastic Syndrome
			Myelofibrosis
			Myeloproliferative Syndrome
			Non Hodgkin Lymphoma
BCR	NCT02141282	A Phase 2 Open-Label Study of the Efficacy and Safety of ABT-199 (GDC-0199) in Chronic Lymphocytic Leukemia (CLL) Subjects With Relapse or Refractory to B-Cell Receptor Signaling Pathway Inhibitor Therapy	Chronic Lymphocytic Leukemia	ABT-199	2	14
BCR	NCT02145039	Reduced Intensity Conditioning and Haploidentical Related Bone Marrow for Patients With Hematologic Diseases	Acute Leukemias	Fludarabine	2	1
			Burkitt's Lymphoma	Cyclophosphamide
			Chronic Myelogenous Leukemia
BCR	NCT02158052	Combined Bone Marrow and Renal Transplantation for Hematologic Disorders With End Stage Renal Disease	ALL	Tacrolimus	2	1
			AML	Anti-thymocyte globulin
			Amyloidosis	Bone marrow transplant from a related donor
			Bone Marrow Failure Syndromes
			HL
			Hemoglobinopathies
			MDS
			Multiple Myeloma
			Myelofibrosis
			Myeloid Leukemia, Chronic
			NHL
BCR	NCT02181478	Intra-Osseous Co-Transplant of UCB and hMSC	Acute Lymphoblastic Leukemia	cyclophosphamide	2	1
			Acute Myelogenous Leukemia	fludarabine phosphate
			Chronic Myelogenous Leukemia	cyclosporine
			Hodgkin Lymphoma	mycophenolate mofetil
			Lymphoid Malignancies
			Myelodysplastic Syndromes
			Myelofibrosis
			Refractory Chronic Lymphocytic Leukemia
			Refractory Hodgkin Lymphoma
			Refractory Non-Hodgkin Lymphoma
			Relapsed Chronic Lymphocytic Leukemia
			Relapsed Non-Hodgkin Lymphoma
BCR	NCT02208037	Novel Approaches for Graft-versus-Host Disease Prevention Compared to Contemporary Controls (BMT CTN 1203)	Acute Leukemia	Tacrolimus (ARM with Methotrexate)	2	31
			Chronic Lymphocytic Leukemia	Tacrolimus (ARM with MMF and Cyclophosphamide)
			Chronic Myelogenous Leukemia	Methotrexate (ARM with Maraviroc)
			Hodgkin's Lymphoma	Methotrexate (ARM with Bortezomib)
			Lymphoma, B-Cell	Maraviroc
			Lymphoma, Follicular	Bortezomib
			Lymphoma, Large B-Cell, Diffuse	Mycophenolate mofetil
			Myelodysplasia	Cyclophosphamide
			Small Lymphocytic Lymphoma
BCR	NCT02220985	Selective Depletion of CD45RA+ Naive T Cells From Allogeneic Peripheral Blood Stem Cell Grafts From HLA-Matched Related and Unrelated Donors for Prevention of GVHD	Accelerated Phase Chronic Myelogenous Leukemia, BCR-ABL1 Positive	Cyclophosphamide	2	1
			Acute Biphenotypic Leukemia	Fludarabine Phosphate
			Acute Leukemia of Ambiguous Lineage	Methotrexate
			Acute Undifferentiated Leukemia	Mycophenolate Mofetil
			Adult Acute Lymphoblastic Leukemia in Remission	Tacrolimus
			Adult Acute Myeloid Leukemia in Remission	Thiotepa
			Blast Phase Chronic Myelogenous Leukemia, BCR-ABL1 Positive
			Childhood Acute Lymphoblastic Leukemia in Remission
			Childhood Acute Myeloid Leukemia in Remission
			Graft Versus Host Disease
			Recurrent Adult Acute Lymphoblastic Leukemia
			Recurrent Adult Acute Myeloid Leukemia
			Recurrent Childhood Acute Lymphoblastic Leukemia
			Recurrent Childhood Acute Myeloid Leukemia
			Recurrent Chronic Myelogenous Leukemia, BCR-ABL1 Positive
			Refractory Anemia With Excess Blasts
BCR	NCT02225574	An Open-Label, Phase I/II Study of Nilotinib (Tasigna) and MEK-162 (ARRY-162) Used in Combination for Patients With Refractory or Advanced Chronic Myeloid Leukemia and Philadelphia Positive Acute Leukemia (Protocol CAMN107AUS41T)	Leukemia	MEK-162	2	1
				Nilotinib
BCR	NCT02228382	Safety And Efficacy Study Of Bosutinib In Patients With Philadelphia Chromosome Positive Chronic Myeloid Leukemia Previously Treated With One Or More Tyrosine Kinase Inhibitors	Previously Treated PH + CML	Bosutinib	2	18
BCR	NCT02311998	Phase I/II Study of Bosutinib in Combination With Inotuzumab Ozogamicin in CD22-positive Philadelphia-Chromosome (PC) Positive Acute Lymphoblastic Leukemia (ALL) and Chronic Myeloid Leukemia (CML)	Leukemia	Bosutinib	2	1
				Inotuzumab Ozogamicin
BCR	NCT02319369	Study to Evaluate the Safety, Tolerability and Pharmacokinetics of DS-3032b in Hematological Malignancies	Acute Lymphocytic Leukemia	DS-3032b	2	1
			Acute Myelogenous Leukemia
			Chronic Myelogenous Leukemia
			Myelodysplastic Syndrome
BCR	NCT02379416	Combination Nilotinib and Paclitaxel in Adults With Relapsed Solid Tumors	Solid Tumors	Nilotinib + Paclitaxel	2	1
BCR	NCT02381548	Phase I Trial of AZD1775 and Belinostat in Treating Patients With Relapsed or Refractory Myeloid Malignancies or Untreated Acute Myeloid Leukemia	Blast Phase Chronic Myelogenous Leukemia, BCR-ABL1 Positive	Belinostat	2	2
			Previously Treated Myelodysplastic Syndrome	WEE1 Inhibitor AZD1775
			Recurrent Adult Acute Myeloid Leukemia
			Refractory Chronic Myelogenous Leukemia, BCR-ABL1 Positive
			Secondary Acute Myeloid Leukemia
			Therapy-Related Acute Myeloid Leukemia
			Untreated Adult Acute Myeloid Leukemia
BCR	NCT02467270	Ponatinib in Patients With Resistant Chronic Phase Chronic Myeloid Leukemia (CML) to Characterize the Efficacy and Safety of a Range of Doses	Myeloid Leukemia, Chronic, Chronic Phase	ponatinib 45 mg	2	16
				ponatinib 30 mg
				ponatinib 15 mg
BCR	NCT02514083	A Phase II Study Using Ibrutinib and Short-Course Fludarabine in Previously Untreated Patients With Chronic Lymphocytic Leukemia/Small Lymphocytic Lymphoma (CLL/SLL)	CLL (Chronic Lymphocytic Leukemia)	Ibrutinib	2	1
			SLL (Small Lymphocytic Lymphoma)	Fludarabine
BCR	NCT02556931	Shorter Course Tacro After NMA, Related Donor PBSCT With High-dose Posttransplant Cy for Hard-to-Engraft Malignancies	Chronic Lymphocytic Leukemia	Fludarabine	2	1
			Chronic Myeloid Leukemia	Cyclophosphamide
			Chronic Myelomonocytic Leukemia	Tacrolimus
			Chronic Myeloproliferative Disorders	Mycophenolate mofetil
			Essential Thrombocythemia
			Multiple Myeloma
			Myelodysplastic Syndromes
			Myelofibrosis
			Plasma Cell Dyscrasia
			Plasma Cell Leukemia
			Plasma Cell Neoplasm
			Polycythemia Vera
			Prolymphocytic Leukemia
			Small Lymphocytic Lymphoma
BCR	NCT02566395	Stem Cell Transplantation From HLA Partially-Matched Related Donors for Patients With Hematologic Malignancies	Acute Lymphoblastic Leukemia	Cyclophosphamide	2	1
			Acute Myelogenous Leukemia
			Chronic Myelogenous Leukemia
			Hodgkin Lymphoma
			Myelodysplastic Syndrome
			Non-Hodgkin Lymphoma
BCR	NCT02581007	RIC Transplant Using Haplo Donors	Acute Lymphocytic Leukemia	Fludarabine	2	1
			Acute Myelogenous Leukemia	Melphalan
			CMML	Cyclophosphamide
			Chronic Lymphocytic Leukemia
			Chronic Myelogenous Leukemia
			Hodgkin's Lymphoma
			Multiple Myeloma
			Myelodysplastic Syndrome
			Myelofibrosis
			Non-Hodgkin's Lymphoma
BCR	NCT02639559	Safety and Efficacy of BL-8040 for the Mobilization of Donor Hematopoietic Stem Cells and Allogeneic Transplantation in Patients With Advanced Hematological Malignancies	Acute Lymphoblastic Leukemia	BL-8040	2	1
			Acute Myelogenous Leukemia
			Chronic Myelogenous Leukemia
			Hodgkin Disease
			Hodgkin's Disease
			Hodgkins Disease
			Multiple Myeloma
			Myelodysplastic Syndrome
			Myeloproliferative Neoplasm
			Non-Hodgkin Lymphoma
			Non-Hodgkin's Lymphoma
BCR	NCT02689440	Therapy of Early Chronic Phase Chronic Myelogenous Leukemia (CML) With Dasatinib	Chronic Myelogenous Leukemia	Dasatinib	2	1
BCR	NCT02693535	TAPUR: Testing the Use of Food and Drug Administration (FDA) Approved Drugs That Target a Specific Abnormality in a Tumor Gene in People With Advanced Stage Cancer	Advanced Solid Tumors	Erlotinib	2	3
			Lymphoma, Non-Hodgkin	Axitinib
			Multiple Myeloma	Bosutinib
				Crizotinib
				Palbociclib
				Sunitinib
				Temsirolimus
				Trastuzumab and Pertuzumab
				Vemurafenib and Cobimetinib
				Vismodegib
				Cetuximab
				Dasatinib
				Regorafenib
				Olaparib
BCR	NCT02728700	Sirolimus and Mycophenolate Mofetil in Preventing GVHD in Patients With Hematologic Malignancies Undergoing HSCT	Adult Hodgkin Lymphoma	Mycophenolate Mofetil	2	1
			Adult Myelodysplastic Syndrome	Sirolimus
			Blast Phase Chronic Myelogenous Leukemia, BCR-ABL1 Positive
			Childhood Chronic Myelogenous Leukemia, BCR-ABL1 Positive
			Childhood Hodgkin Lymphoma
			Childhood Myelodysplastic Syndrome
			Chronic Phase Chronic Myelogenous Leukemia, BCR-ABL1 Positive
			Myelofibrosis
			Primary Myelofibrosis
			Recurrent Adult Acute Lymphoblastic Leukemia
			Recurrent Adult Acute Myeloid Leukemia
			Recurrent Adult Non-Hodgkin Lymphoma
			Recurrent Childhood Acute Lymphoblastic Leukemia
			Recurrent Childhood Acute Myeloid Leukemia
			Recurrent Childhood Non-Hodgkin Lymphoma
			Recurrent Chronic Myelogenous Leukemia, BCR-ABL1 Positive
			Refractory Chronic Myelogenous Leukemia, BCR-ABL1 Positive
			Refractory Non-Hodgkin Lymphoma
BCR	NCT02730195	Pioglitazone and Tyrosine Kinase Inhibitor in Treating Patients With Relapsed Chronic Myeloid Leukemia	Chronic Myelogenous Leukemia, BCR-ABL1 Positive	Pioglitazone Hydrochloride	2	1
			Recurrent Chronic Myelogenous Leukemia, BCR-ABL1 Positive	Tyrosine Kinase Inhibitor (TKI)
BRAF	NCT00338377	Lymphodepletion Plus Adoptive Cell Transfer With or Without Dendritic Cell Immunization in Patients With Metastatic Melanoma	Melanoma	Cyclophosphamide	6	1
				Fludarabine
				Mesna
BRAF	NCT01037790	PHASE II TRIAL OF THE CYCLIN-DEPEDENT KINASE INHIBITOR PD 0332991 IN PATIENTS WITH CANCER	Adenocarcinoma of the Colon	PD-0332991	6	1
			Adenocarcinoma of the Rectum
			Adult Central Nervous System Germ Cell Tumor
			Adult Solid Tumor
			Adult Teratoma
			Benign Teratoma
			Estrogen Receptor-negative Breast Cancer
			Estrogen Receptor-positive Breast Cancer
			Familial Testicular Germ Cell Tumor
			HER2-negative Breast Cancer
			HER2-positive Breast Cancer
			Male Breast Cancer
			Ovarian Immature Teratoma
			Ovarian Mature Teratoma
			Ovarian Monodermal and Highly Specialized Teratoma
			Progesterone Receptor-negative Breast Cancer
			Progesterone Receptor-positive Breast Cancer
			Recurrent Breast Cancer
			Recurrent Colon Cancer
			Recurrent Extragonadal Germ Cell Tumor
			Recurrent Extragonadal Non-seminomatous Germ Cell Tumor
			Recurrent Extragonadal Seminoma
			Recurrent Malignant Testicular Germ Cell Tumor
			Recurrent Melanoma
			Recurrent Ovarian Germ Cell Tumor
			Recurrent Rectal Cancer
			Stage III Extragonadal Non-seminomatous Germ Cell Tumor
			Stage III Extragonadal Seminoma
			Stage III Malignant Testicular Germ Cell Tumor
			Stage III Ovarian Germ Cell Tumor
			Stage IV Breast Cancer
			Stage IV Colon Cancer
			Stage IV Extragonadal Non-seminomatous Germ Cell Tumor
			Stage IV Extragonadal Seminoma
			Stage IV Melanoma
			Stage IV Ovarian Germ Cell Tumor
			Stage IV Rectal Cancer
			Testicular Immature Teratoma
			Testicular Mature Teratoma
BRAF	NCT01231594	A Rollover Study to Provide Continued Treatment With GSK2118436 to Subjects With BRAF Mutation-Positive Tumors	Cancer	GSK2118436	6	19
				GSK1120212
				Other approved anti-cancer agent
BRAF	NCT01282502	Midostaurin (PKC412) for Locally Advanced Rectal Cancer	Adenocarcinoma of the Rectum	Midostaurin	6	2
BRAF	NCT01306045	Molecular Profiling and Targeted Therapy for Advanced Non-Small Cell Lung Cancer, Small Cell Lung Cancer, and Thymic Malignancies	Carcinoma, Non-Small-Cell Lung	AZD6244	6	2
			Carcinoma, Small Cell Lung	MK-2206
			Carcinoma, Thymic	Lapatinib
				Erlotinib
				Sunitinib
BRAF	NCT01336634	Study of Selective BRAF Kinase Inhibitor Dabrafenib Monotherapy Twice Daily and in Combination With Dabrafenib Twice Daily and Trametinib Once Daily in Combination Therapy in Subjects With BRAF V600E Mutation Positive Metastatic (Stage IV) Non-small Cell Lung Cancer.	Cancer	Dabrafenib	6	13
BRAF	NCT01449058	A Phase Ib Study of MEK162 Plus BYL719 in Adult Patients With Selected Advanced Solid Tumors	Advanced and Selected Solid Tumors, AML, High Risk and Very High Risk MDS	BYL719 plus MEK162	6	4
BRAF	NCT01512251	BKM120 Combined With Vemurafenib (PLX4032) in BRAFV600E/K Mutant Advanced Melanoma	BRAF Mutant Metastatic Melanoma	BKM120 Combined with Vemurafenib (PLX4032)	6	1
BRAF	NCT01531361	Sorafenib or Crizotinib and Vemurafenib in Advanced Cancer	Advanced Cancers	Vemurafenib	6	1
				Sorafenib
				Crizotinib
BRAF	NCT01638676	A Phase I/II Trial of Vemurafenib and Metformin to Melanoma Patients	Melanoma	Vemurafenib	6	1
				Metformin
BRAF	NCT01656642	A Phase 1b Study of Atezolizumab in Combination With Vemurafenib or Vemurafenib Plus Cobimetinib in Participants With BRAFV600-Mutation Positive Metastatic Melanoma	Malignant Melanoma	Atezolizumab	6	9
				Cobimetinib
				Vemurafenib
BRAF	NCT01659151	Vemurafenib With Lymphodepletion Plus Adoptive Cell Transfer & High Dose IL-2 Metastatic Melanoma	Metastatic Melanoma	High Dose Interleukin-2 (IL-2)	6	1
				Vemurafenib
				Lymphodepletion
BRAF	NCT01667419	BRIM8: A Study of Vemurafenib Adjuvant Therapy in Patients With Resected Cutaneous BRAF Mutant Melanoma	Malignant Melanoma	Placebo	6	3
				Vemurafenib
BRAF	NCT01677741	A Study to Determine Safety, Tolerability and Pharmacokinetics of Oral Dabrafenib In Children and Adolescent Subjects	Neoplasms, Brain	Dabrafenib	6	7
BRAF	NCT01701037	Dabrafenib Alone and in Combination With Trametinib Before Surgery in Treating Patients With Locally or Regionally Advanced Melanoma That Can Be Removed By Surgery	Recurrent Melanoma	dabrafenib	6	1
			Stage IIB Melanoma (Locally Advanced)	trametinib
			Stage IIC Melanoma (Locally Advanced)
			Stage IIIA Melanoma
			Stage IIIB Melanoma
			Stage IIIC Melanoma
			Stage IV Melanoma (Limited, Resectable)
BRAF	NCT01709292	Vemurafenib Neoadjuvant Trial in Locally Advanced Thyroid Cancer	Thyroid Cancer	Vemurafenib (All Groups)	6	1
				Vemurafenib (Post Surgery) - Group A + C
BRAF	NCT01711632	BRAF Inhibitor, Vemurafenib, in Patients With Relapsed or Refractory Hairy Cell Leukemia	Hairy Cell Leukemia	Vemurafenib	6	5
BRAF	NCT01723202	Dabrafenib With or Without Trametinib in Treating Patients With Recurrent Thyroid Cancer	Follicular Thyroid Cancer	dabrafenib	6	5
			Insular Thyroid Cancer	trametinib
			Papillary Thyroid Cancer
			Recurrent Thyroid Cancer
BRAF	NCT01726738	LCCC 1128: Open Label Phase II Trial of the BRAF Inhibitor (Dabrafenib) and the MEK Inhibitor (Trametinib) in Unresectable Stage III and Stage IV BRAF Mutant Melanoma; Correlation of Resistance With the Kinome and Functional Mutations	BRAF Mutant Melanoma	BRAF inhibitor dabrafenib and MEK inhibitor trametinib	6	1
			Stage III Melanoma
			Stage IV Melanoma
			Unresectable Melanoma
BRAF	NCT01739764	An Extension (Rollover) Study of Vemurafenib in Patients With BRAF V600 Mutation-Positive Malignancies Previously Enrolled in an Antecedent Vemurafenib Protocol	Neoplasms	vemurafenib	6	12
BRAF	NCT01740648	Trametinib, Fluorouracil, and Radiation Therapy Before Surgery in Treating Patients With Stage II-III Rectal Cancer	Recurrent Rectal Cancer	trametinib	6	1
			Stage IIA Rectal Cancer	fluorouracil
			Stage IIB Rectal Cancer
			Stage IIC Rectal Cancer
			Stage IIIA Rectal Cancer
			Stage IIIB Rectal Cancer
			Stage IIIC Rectal Cancer
BRAF	NCT01748149	Vemurafenib in Children With Recurrent/Refractory BRAFV600E-mutant Gliomas	Pediatric Recurrent/Refractory BRAFV600E-mutant Gliomas	Vemurafenib	6	10
BRAF	NCT01750918	BRAF/MEK/EGFR Inhibitor Combination Study in Colorectal Cancer (CRC)	Cancer	Dabrafenib	6	7
				Trametinib
				Panitumumab
				5-fluorouracil
BRAF	NCT01765543	A Pharmacokinetics Study to Investigate the Effect of Rifampin on Vemurafenib in Patients With BRAFV600 Mutation-Positive Metastatic Malignancy	Malignant Melanoma, Neoplasms	rifampin	6	2
				vemurafenib
BRAF	NCT01787500	Vemurafenib, Cetuximab, and Irinotecan in Advanced Solid Cancers	Advanced Cancers	Vemurafenib	6	1
				Cetuximab
				Irinotecan
BRAF	NCT01794793	Study to Allow Access to Pasireotide for Patients Benefiting From Pasireotide Treatment in a Novartis-sponsored Study.	Acromegaly,	Pasireotide	6	6
			Cushing's Disease,
			Dumping Syndrome,
			Ectopic ACTH Secreting (EAS) Tumors,
			Melanoma Negative for bRAF,
			Melanoma Negative for nRAS
			Neuroendocrine Tumors,
			Pituitary Tumors
			Prostate Cancer,
BRAF	NCT01813214	The Effects of Vemurafenib + Cobimetinib on Immunity in Patients With Melanoma	Melanoma	Vemurafenib	6	4
BRAF	NCT01876212	Dendritic Cell Vaccines + Dasatinib for Metastatic Melanoma	Metastatic Melanoma	Dasatinib	6	1
BRAF	NCT01876511	Phase 2 Study of MK-3475 in Patients With Microsatellite Unstable (MSI) Tumors	MSI Negative Colorectal Cancer	MK-3475	6	6
			MSI Positive Colorectal Cancer
			MSI Positive Non-Colorectal Cancers
BRAF	NCT01876641	Treatment of a Resistant Disease Using Decitabine Combined With Vemurafenib Plus Cobimetinib	BRAF-mutated Metastatic Melanoma	Vemurafenib + Cobimetinib, Decitabine	6	1
			Melanoma
			Metastatic Melanoma
			V600EBRAF-mutated Metastatic Melanoma
BRAF	NCT01877811	Study of RXDX-105 (RET and BRAF Inhibitor) in Patients With Advanced Solid Tumors	Solid Tumors	RXDX-105	6	5
BRAF	NCT01902173	GSK2141795, Dabrafenib, and Trametinib in Treating Patients With Stage IIIC-IV Cancer	Adult Solid Neoplasm	Akt Inhibitor GSK2141795	6	7
			Recurrent Colon Carcinoma	Dabrafenib
			Recurrent Melanoma	Trametinib
			Recurrent Ovarian Carcinoma
			Stage IIIC Colon Cancer
			Stage IIIC Ovarian Cancer
			Stage IIIC Skin Melanoma
			Stage IV Skin Melanoma
BRAF	NCT01940809	Ipilimumab With or Without Dabrafenib, Trametinib, and/or Nivolumab in Treating Patients With Melanoma That Is Metastatic or Cannot Be Removed by Surgery	Metastatic Melanoma	Dabrafenib	6	2
			Stage IIIA Skin Melanoma	Trametinib
			Stage IIIB Skin Melanoma
			Stage IIIC Skin Melanoma
			Stage IV Skin Melanoma
BRAF	NCT01943422	Safety and Efficacy Study of Vemurafenib and High-dose Interferon Alfa-2b in Melanoma	Melanoma	High-dose Interferon alfa-2b	6	1
				Vemurafenib
BRAF	NCT01947023	Dabrafenib and Lapatinib Ditosylate in Treating Patients With Refractory Thyroid Cancer That Cannot Be Removed by Surgery	BRAF V600E Mutation Present	Dabrafenib	6	1
			BRAF V600K Mutation Present	Lapatinib Ditosylate
			Recurrent Thyroid Gland Carcinoma
BRAF	NCT01954043	A Pharmacokinetics (PK) Study of the Effects Rabeprazole and Rifampin on Dabrafenib in Subjects With BRAF V600 Mutation Positive Tumors	Cancer	Dabrafenib 150 mg twice a day (BID)	6	2
				Rabeprazole 40 mg once daily (OD)
				Rifampin 600 mg OD
BRAF	NCT01978236	Dabrafenib/Trametinib, BRAF or BRAF AND MEK Pre-op With BRAF and MEK Post-op, Phase IIB, Melanoma With Brain Mets,Biomarkers and Metabolites	Melanoma and Brain Metastases	Dabrafenib 150 mg	6	1
				Trametinib 2.0 mg
BRAF	NCT01989585	Dabrafenib, Trametinib, and Navitoclax in Treating Patients With Solid Tumors That Are Metastatic or Cannot Be Removed by Surgery	Metastatic Melanoma	Dabrafenib	6	3
			Recurrent Melanoma	Trametinib
			Solid Neoplasm
			Stage IIIA Skin Melanoma
			Stage IIIB Skin Melanoma
			Stage IIIC Skin Melanoma
			Stage IV Skin Melanoma
BRAF	NCT02015117	Trametinib With or Without Whole Brain Radiation Therapy in Treating Patients With Brain Metastases	Metastatic Malignant Neoplasm in the Brain	Trametinib	6	2
BRAF	NCT02034110	Efficacy and Safety of the Combination Therapy of Dabrafenib and Trametinib in Subjects With BRAF V600E- Mutated Rare Cancers	Cancer	Dabrafenib	6	5
				Trametinib
BRAF	NCT02039947	Study to Evaluate Treatment of Dabrafenib Plus Trametinib in Subjects With BRAF Mutation-Positive Melanoma That Has Metastasized to the Brain	Melanoma and Brain Metastases	Dabrafenib	6	7
				Trametinib
BRAF	NCT02091141	A Study Evaluating Herceptin/Perjeta, Tarceva, Zelboraf, and Erivedge Treatment Targeted Against Certain Mutations in Cancer Patients	Neoplasms	Erlotinib [Tarceva]	6	38
				Pertuzumab [Perjeta]
				Trastuzumab [Herceptin]
				Vemurafenib [Zelboraf]
				Vismodegib [Erivedge]
BRAF	NCT02094872	Molecularly Targeted Therapy in Treating Patients With BRAF Wild-type Melanoma That is Metastatic	Recurrent Melanoma	molecularly targeted therapy	6	8
			Stage IIIA Melanoma
			Stage IIIB Melanoma
			Stage IIIC Melanoma
			Stage IV Melanoma
BRAF	NCT02097225	Hsp90 Inhibitor AT13387, Dabrafenib, and Trametinib in Treating Patients With Recurrent Melanoma or Solid Tumors That Are Metastatic or Cannot Be Removed by Surgery	Recurrent Melanoma	Dabrafenib	6	1
			Solid Neoplasm	Hsp90 Inhibitor AT13387
			Stage IIIA Skin Melanoma	Trametinib
			Stage IIIB Skin Melanoma
			Stage IIIC Skin Melanoma
			Stage IV Skin Melanoma
BRAF	NCT02130466	A Study of the Safety and Efficacy of Pembrolizumab (MK-3475) in Combination With Trametinib and Dabrafenib in Participants With Advanced Melanoma (MK-3475-022/KEYNOTE-022)	Melanoma	Dabrafenib	6	8
				Trametinib
BRAF	NCT02142335	Rituxan and Abraxane for the Treatment of Patients With Inoperable Stage III and IV Malignant Melanoma	Malignant Melanoma of Skin Stage III	Rituxan	6	1
			Metastatic Melanoma
BRAF	NCT02143050	Study of Dabrafenib, Trametinib and Metformin for Melanoma Patients	Melanoma	Dabrafenib	6	2
				Trametinib
				Metformin
BRAF	NCT02196181	Dabrafenib and Trametinib in Treating Patients With Stage III-IV BRAF Mutant Melanoma That Cannot Be Removed by Surgery	BRAF V600E Mutation Present	Dabrafenib	6	595
			BRAF V600K Mutation Present	Trametinib
			Recurrent Melanoma
			Stage IIIA Skin Melanoma
			Stage IIIB Skin Melanoma
			Stage IIIC Skin Melanoma
			Stage IV Skin Melanoma
BRAF	NCT02224781	Dabrafenib and Trametinib Followed by Ipilimumab and Nivolumab or Ipilimumab and Nivolumab Followed by Dabrafenib and Trametinib in Treating Patients With Stage III-IV BRAFV600 Melanoma	Recurrent Melanoma	Dabrafenib	6	289
			Stage IIIA Skin Melanoma	Trametinib
			Stage IIIB Skin Melanoma
			Stage IIIC Skin Melanoma
			Stage IV Skin Melanoma
BRAF	NCT02257424	The BAMM Trial: BRAF, Autophagy and MEK Inhibition in Metastatic Melanoma: A Phase I/2 Trial of Dabrafenib, Trametinib and Hydroxychloroquine in Patients With Advanced BRAF Mutant Melanoma	Advanced BRAF Mutant Melanoma	Trametinib 2mg daily	6	1
BRAF	NCT02278133	Study of WNT974 in Combination With LGX818 and Cetuximab in Patients With BRAF-mutant Metastatic Colorectal Cancer (mCRC) and Wnt Pathway Mutations	Metastatic Colorectal Cancer	WNT974	6	2
				LGX818
BRAF	NCT02285439	Phase I/II Study of MEK162 for Children With Ras/Raf Pathway Activated Tumors	Low-Grade Gliomas	MEK162	6	1
			Malignant Neoplasms, Brain
			Soft Tissue Neoplasms
BRAF	NCT02296112	Trametinib in Treating Patients With Advanced Melanoma With BRAF Non-V600 Mutations	Recurrent Melanoma	trametinib	6	2
			Stage IIIB Melanoma
			Stage IIIC Melanoma
			Stage IV Melanoma
BRAF	NCT02306850	Neoadjuvant Pembrolizumab for Unresectable Stage III and Unresectable Stage IV Melanoma	Melanoma	Pembrolizumab	6	1
			Metastatic Melanoma
			Stage III Melanoma
			Stage IV Melanoma
			Unresectable Malignant Neoplasm
BRAF	NCT02318901	Pembrolizumab and Monoclonal Antibody Therapy in Advanced Cancer	Advanced Cancer	Pembrolizumab	6	1
			Breast Cancer	Trastuzumab
			Colorectal Cancer	ado-trastuzumab emtansine
			Esophageal Cancer	Cetuximab
			Gastric Cancer
BRAF	NCT02382549	A Clinical Trial to Evaluate a Melanoma Helper Peptide Vaccine Plus Dabrafenib and Trametinib	Melanoma	dabrafenib	6	1
				Trametinib
BRAF	NCT02427893	Trial of Vemurafenib and Cobimetinib in Patients With Advanced BRAFV600 Mutant Melanoma	Melanoma	Cobimetinib	6	1
				Vemurafenib
BRAF	NCT02428712	A Study of PLX8394 as a Single Agent in Patients With Advanced, Unresectable Solid Tumors	Advanced, Unresectable Solid Tumors	PLX8394	6	4
BRAF	NCT02451553	Afatinib Dimaleate and Capecitabine in Treating Patients With Advanced Refractory Solid Tumors, Pancreatic Cancer or Biliary Cancer	Bile Duct Carcinoma	Afatinib Dimaleate	6	2
			Recurrent Pancreatic Carcinoma	Capecitabine
			Solid Neoplasm
			Stage III Pancreatic Cancer
			Stage IVA Pancreatic Cancer
			Stage IVB Pancreatic Cancer
BRAF	NCT02455245	A Study Comparing Two Carboplatin Containing Regimens for Children and Young Adults With Previously Untreated Low Grade Glioma	Low Grade Glioma	Carboplatin	6	9
				Vincristine
BRAF	NCT02456701	Enhancing Radioiodine Incorporation Into BRAF Mutant Thyroid Cancers With the Combination of Vemurafenib and KTN3379	Thyroid Cancer	vemurafenib	6	1
BRAF	NCT02465060	NCI-MATCH: Targeted Therapy Directed by Genetic Testing in Treating Patients With Advanced Refractory Solid Tumors or Lymphomas	Advanced Malignant Neoplasm	Afatinib	6	835
			Lymphoma	Akt inhibitor AZD5363
			Refractory Malignant Neoplasm	Binimetinib
			Solid Neoplasm	Crizotinib
				Dabrafenib
				Dasatinib
				Defactinib
				FGFR Inhibitor AZD4547
				Osimertinib
				Palbociclib
				PI3K-beta Inhibitor GSK2636771
				Sunitinib Malate
				Taselisib
				Trametinib
				Vismodegib
BRAF	NCT02508077	FOLFIRI and Panitumumab in Treating Patients With RAS and BRAF Wild-Type Metastatic Colorectal Cancer	Recurrent Colorectal Carcinoma	Fluorouracil	6	3
			Stage IVA Colorectal Cancer	Irinotecan Hydrochloride
			Stage IVB Colorectal Cancer	Leucovorin Calcium
BRAF	NCT02523040	A Study of Lenalidomide for Adult Histiocyte Disorders	Histiocytic Sarcoma (HS)	Lenalidomide	6	1
			Histiocytoses Erdheim-chester Disease
			Langerhans Cell Histiocytosis (LCH)
BRAF	NCT02693535	TAPUR: Testing the Use of Food and Drug Administration (FDA) Approved Drugs That Target a Specific Abnormality in a Tumor Gene in People With Advanced Stage Cancer	Advanced Solid Tumors	Erlotinib	6	3
			Lymphoma, Non-Hodgkin	Axitinib
			Multiple Myeloma	Bosutinib
				Crizotinib
				Palbociclib
				Sunitinib
				Temsirolimus
				Trastuzumab and Pertuzumab
				Vemurafenib and Cobimetinib
				Vismodegib
				Cetuximab
				Dasatinib
				Regorafenib
				Olaparib
BRCA1	NCT01434316	Veliparib and Dinaciclib in Treating Patients With Advanced Solid Tumors	Advanced Malignant Neoplasm	Dinaciclib	8	4
			BRCA1 Mutation Carrier	Veliparib
			BRCA2 Mutation Carrier
			Solid Neoplasm
BRCA1	NCT01482715	A Study of Oral Rucaparib in Patients With a Solid Tumor (Phase I) or With gBRCA Mutation Ovarian Cancer (Phase II)	Advanced Solid Tumor With Evidence of Germline or Somatic BRCA	Rucaparib	8	1
			Fallopian Tube Cancer
			Ovarian Cancer
			Peritoneal Cancer
BRCA1	NCT01525589	A Phase II Clinical Trial of PM01183 in BRCA 1/2-Associated or Unselected Metastatic Breast Cancer	Breast Cancer	PM01183	8	5
BRCA1	NCT01585805	Gemcitabine Hydrochloride and Cisplatin With or Without Veliparib or Veliparib Alone in Treating Patients With Locally Advanced or Metastatic Pancreatic Cancer	BRCA1 Mutation Carrier	Cisplatin	8	5
			BRCA2 Mutation Carrier	Gemcitabine Hydrochloride
			Metastatic Pancreatic Adenocarcinoma	Veliparib
			Pancreatic Adenocarcinoma
			Recurrent Pancreatic Carcinoma
			Stage III Pancreatic Cancer
			Stage IV Pancreatic Cancer
BRCA1	NCT01670500	Cisplatin vs. Doxorubicin/Cyclophosphamide in BrCa	Breast Cancer	Cisplatin	8	12
				Cyclophosphamide
				Doxorubicin
BRCA1	NCT01748825	AZD1775 for Advanced Solid Tumors	Lymphoma	MK-1775 (AZD1775)	8	1
			Neoplasms
BRCA1	NCT01905046	Metformin Hydrochloride in Patients With Atypical Hyperplasia or In Situ Breast Cancer to Placebo in Decreasing Atypical Cells in Patients With Atypical Hyperplasia or in Situ Breast Cancer	Atypical Ductal Breast Hyperplasia	metformin hydrochloride	8	16
			BRCA1 Mutation Carrier
			BRCA2 Mutation Carrier
			Ductal Breast Carcinoma in Situ
			Lobular Breast Carcinoma in Situ
BRCA1	NCT01905592	A Phase III Trial of Niraparib Versus Physician's Choice in HER2 Negative, Germline BRCA Mutation-positive Breast Cancer Patients	BRCA1 Gene Mutation	niraparib	8	27
			BRCA2 Gene Mutation	Physician's choice
			Carcinoma of Breast
			Human Epidermal Growth Factor 2 Negative Carcinoma of Breast
BRCA1	NCT01945775	A Study Evaluating Talazoparib (BMN 673), a PARP Inhibitor, in Advanced and/or Metastatic Breast Cancer Patients With BRCA Mutation (EMBRACA Study)	BRCA 1 Gene Mutation	talazoparib	8	58
			BRCA 2 Gene Mutation	Physician's-Choice
			Breast Neoplasms
BRCA1	NCT01989546	Pilot Trial of BMN 673, an Oral PARP Inhibitor, in Patients With Advanced Solid Tumors and Deleterious BRCA Mutations	Advanced Breast Cancer	BMN 673	8	1
			Advanced Ovarian Cancer
			Advanced Solid Tumors
			Primary Peritoneal Cancer
BRCA1	NCT01990352	Correlate BRCA1 Protein Expression With Response to DNA Damaging Chemotherapy	Breast Cancer	Pegylated liposomal doxorubicin	8	1
BRCA1	NCT02032823	Olaparib as Adjuvant Treatment in Patients With Germline BRCA Mutated High Risk HER2 Negative Primary Breast Cancer	Breast Cancer	Olaparib	8	294
				Placebo
BRCA1	NCT02157792	An Open-Label, First-in-Human Study of the Safety, Tolerability, and Pharmacokinetics of VX-970 in Combination With Cytotoxic Chemotherapy	Advanced Solid Tumor	VX-970	8	3
				gemcitabine
				cisplatin
				etoposide
BRCA1	NCT02163694	A Phase 3 Randomized, Placebo-controlled Trial of Carboplatin and Paclitaxel With or Without Veliparib (ABT-888) in HER2-negative Metastatic or Locally Advanced Unresectable BRCA-associated Breast Cancer	Metastatic Breast Cancer	Veliparib	8	52
				Carboplatin
				Paclitaxel
BRCA1	NCT02184195	Olaparib in gBRCA Mutated Pancreatic Cancer Whose Disease Has Not Progressed on First Line Platinum-Based Chemotherapy	Germline BRCA1/2 Mutations and	Olaparib	8	19
			Metastatic Adenocarcinoma of the Pancreas	Olaparib
				Placebo
				Placebo
BRCA1	NCT02203513	A Phase II Single Arm Pilot Study of the Chk1/2 Inhibitor (LY2606368) in BRCA1/2 Mutation Associated Breast or Ovarian Cancer, Triple Negative Breast Cancer, High Grade Serous Ovarian Cancer, and Metastatic Castrate-Resistant Prostate Cancer	Breast Cancer	LY2606368	8	1
			Ovarian Cancer
			mCRPC
BRCA1	NCT02282020	Olaparib Treatment in Relapsed Germline Breast Cancer Susceptibility Gene (BRCA) Mutated Ovarian Cancer Patients Who Have Progressed at Least 6 Months After Last Platinum Treatment and Have Received at Least 2 Prior Platinum Treatments	Relapsed Ovarian Cancer, BRCA Mutation, Platinum Sensitivity	OLAPARIB	8	28
				Single agent chemotherapy
BRCA1	NCT02314156	Transdermal or Oral Telapristone Acetate in Treating Patients Undergoing Mastectomy	BRCA1 Mutation Carrier	Telapristone Acetate	8	2
			BRCA2 Mutation Carrier	Telapristone Acetate
			Ductal Breast Carcinoma In Situ
			Lobular Breast Carcinoma In Situ
			Stage 0 Breast Cancer
			Stage IA Breast Cancer
			Stage IB Breast Cancer
			Stage IIA Breast Cancer
			Stage IIB Breast Cancer
BRCA1	NCT02345265	Olaparib and Cediranib Maleate in Treating Patients With Recurrent Ovarian, Primary Peritoneal, or Fallopian Tube Cancer	BRCA1 Gene Mutation	Cediranib Maleate	8	8
			BRCA2 Gene Mutation	Olaparib
			Fallopian Tube Endometrioid Adenocarcinoma
			Fallopian Tube Serous Adenocarcinoma
			High Grade Ovarian Serous Adenocarcinoma
			Ovarian Endometrioid Tumor
			Primary Peritoneal Serous Adenocarcinoma
			Recurrent Fallopian Tube Carcinoma
			Recurrent Ovarian Carcinoma
			Recurrent Primary Peritoneal Carcinoma
BRCA1	NCT02393794	Romidepsin Plus Cisplatin in Locally Recurrent or Metastatic Triple Negative Breast Cancer (TNBC)	Breast Cancer	Romidepsin	8	1
			Triple-Negative Breast Cancer	Cisplatin
BRCA1	NCT02401347	Talazoparib Beyond BRCA (TBB) Trial	Advanced Breast Cancer	Talazoparib Tosylate	8	1
			HER2/Neu Negative
			Triple-Negative Breast Cancer
BRCA1	NCT02454972	Clinical Trial of Lurbinectedin (PM01183) in Selected Advanced Solid Tumors	Advanced Solid Tumors	lurbinectedin (PM01183)	8	5
BRCA1	NCT02482311	Safety, Tolerance, PK, and Anti-tumour Activity of AZD1775 Monotherapy in Patients With Advanced Solid Tumours	Ovarian Cancer, TNBC, SCLC, Other Solid Tumours	AZD 1775	8	6
BRCA1	NCT02561832	A Phase I, Open-Label, 2 Part Multicentre Study to Assess the Safety, Tolerability and Efficacy of Olaparib in Combination With Carboplatin in Patients With HER-2 Negative Breast Cancer	Breast Cancer	Olaparib	8	3
				Carboplatin
				Anthracycline
				Cyclophosphamide
BRCA1	NCT02571725	PARP-inhibition and CTLA-4 Blockade in BRCA-deficient Ovarian Cancer	Fallopian Tube Cancer	Olaparib	8	1
			Ovarian Cancer	Tremelimumab
			Peritoneal Neoplasms
BRCA1	NCT02598895	Docetaxel and Carboplatin in Treating Patients With Metastatic, Hormone Resistant Prostate Cancer Containing Inactivated Genes in the BRCA 1/2 Pathway	Hormone-Resistant Prostate Cancer	Carboplatin	8	1
			Metastatic Prostate Carcinoma	Docetaxel
			Prostate Carcinoma Metastatic in the Bone
			Recurrent Prostate Carcinoma
			Stage IV Prostate Cancer
BRCA1	NCT02693535	TAPUR: Testing the Use of Food and Drug Administration (FDA) Approved Drugs That Target a Specific Abnormality in a Tumor Gene in People With Advanced Stage Cancer	Advanced Solid Tumors	Erlotinib	8	3
			Lymphoma, Non-Hodgkin	Axitinib
			Multiple Myeloma	Bosutinib
				Crizotinib
				Palbociclib
				Sunitinib
				Temsirolimus
				Trastuzumab and Pertuzumab
				Vemurafenib and Cobimetinib
				Vismodegib
				Cetuximab
				Dasatinib
				Regorafenib
				Olaparib
BRCA2	NCT01434316	Veliparib and Dinaciclib in Treating Patients With Advanced Solid Tumors	Advanced Malignant Neoplasm	Dinaciclib	2	4
			BRCA1 Mutation Carrier	Veliparib
			BRCA2 Mutation Carrier
			Solid Neoplasm
BRCA2	NCT01482715	A Study of Oral Rucaparib in Patients With a Solid Tumor (Phase I) or With gBRCA Mutation Ovarian Cancer (Phase II)	Advanced Solid Tumor With Evidence of Germline or Somatic BRCA	Rucaparib	2	1
			Fallopian Tube Cancer
			Ovarian Cancer
			Peritoneal Cancer
BRCA2	NCT01585805	Gemcitabine Hydrochloride and Cisplatin With or Without Veliparib or Veliparib Alone in Treating Patients With Locally Advanced or Metastatic Pancreatic Cancer	BRCA1 Mutation Carrier	Cisplatin	2	5
			BRCA2 Mutation Carrier	Gemcitabine Hydrochloride
			Metastatic Pancreatic Adenocarcinoma	Veliparib
			Pancreatic Adenocarcinoma
			Recurrent Pancreatic Carcinoma
			Stage III Pancreatic Cancer
			Stage IV Pancreatic Cancer
BRCA2	NCT01670500	Cisplatin vs. Doxorubicin/Cyclophosphamide in BrCa	Breast Cancer	Cisplatin	2	12
				Cyclophosphamide
				Doxorubicin
BRCA2	NCT01905046	Metformin Hydrochloride in Patients With Atypical Hyperplasia or In Situ Breast Cancer to Placebo in Decreasing Atypical Cells in Patients With Atypical Hyperplasia or in Situ Breast Cancer	Atypical Ductal Breast Hyperplasia	metformin hydrochloride	2	16
			BRCA1 Mutation Carrier
			BRCA2 Mutation Carrier
			Ductal Breast Carcinoma in Situ
			Lobular Breast Carcinoma in Situ
BRCA2	NCT01905592	A Phase III Trial of Niraparib Versus Physician's Choice in HER2 Negative, Germline BRCA Mutation-positive Breast Cancer Patients	BRCA1 Gene Mutation	niraparib	2	27
			BRCA2 Gene Mutation	Physician's choice
			Carcinoma of Breast
			Human Epidermal Growth Factor 2 Negative Carcinoma of Breast
BRCA2	NCT01945775	A Study Evaluating Talazoparib (BMN 673), a PARP Inhibitor, in Advanced and/or Metastatic Breast Cancer Patients With BRCA Mutation (EMBRACA Study)	BRCA 1 Gene Mutation	talazoparib	2	58
			BRCA 2 Gene Mutation	Physician's-Choice
			Breast Neoplasms
BRCA2	NCT02157792	An Open-Label, First-in-Human Study of the Safety, Tolerability, and Pharmacokinetics of VX-970 in Combination With Cytotoxic Chemotherapy	Advanced Solid Tumor	VX-970	2	3
				gemcitabine
				cisplatin
				etoposide
BRCA2	NCT02163694	A Phase 3 Randomized, Placebo-controlled Trial of Carboplatin and Paclitaxel With or Without Veliparib (ABT-888) in HER2-negative Metastatic or Locally Advanced Unresectable BRCA-associated Breast Cancer	Metastatic Breast Cancer	Veliparib	2	52
				Carboplatin
				Paclitaxel
BRCA2	NCT02314156	Transdermal or Oral Telapristone Acetate in Treating Patients Undergoing Mastectomy	BRCA1 Mutation Carrier	Telapristone Acetate	2	2
			BRCA2 Mutation Carrier	Telapristone Acetate
			Ductal Breast Carcinoma In Situ
			Lobular Breast Carcinoma In Situ
			Stage 0 Breast Cancer
			Stage IA Breast Cancer
			Stage IB Breast Cancer
			Stage IIA Breast Cancer
			Stage IIB Breast Cancer
BRCA2	NCT02345265	Olaparib and Cediranib Maleate in Treating Patients With Recurrent Ovarian, Primary Peritoneal, or Fallopian Tube Cancer	BRCA1 Gene Mutation	Cediranib Maleate	2	8
			BRCA2 Gene Mutation	Olaparib
			Fallopian Tube Endometrioid Adenocarcinoma
			Fallopian Tube Serous Adenocarcinoma
			High Grade Ovarian Serous Adenocarcinoma
			Ovarian Endometrioid Tumor
			Primary Peritoneal Serous Adenocarcinoma
			Recurrent Fallopian Tube Carcinoma
			Recurrent Ovarian Carcinoma
			Recurrent Primary Peritoneal Carcinoma
BRCA2	NCT02393794	Romidepsin Plus Cisplatin in Locally Recurrent or Metastatic Triple Negative Breast Cancer (TNBC)	Breast Cancer	Romidepsin	2	1
			Triple-Negative Breast Cancer	Cisplatin
BRCA2	NCT02401347	Talazoparib Beyond BRCA (TBB) Trial	Advanced Breast Cancer	Talazoparib Tosylate	2	1
			HER2/Neu Negative
			Triple-Negative Breast Cancer
BRCA2	NCT02571725	PARP-inhibition and CTLA-4 Blockade in BRCA-deficient Ovarian Cancer	Fallopian Tube Cancer	Olaparib	2	1
			Ovarian Cancer	Tremelimumab
			Peritoneal Neoplasms
BRCA2	NCT02693535	TAPUR: Testing the Use of Food and Drug Administration (FDA) Approved Drugs That Target a Specific Abnormality in a Tumor Gene in People With Advanced Stage Cancer	Advanced Solid Tumors	Erlotinib	2	3
			Lymphoma, Non-Hodgkin	Axitinib
			Multiple Myeloma	Bosutinib
				Crizotinib
				Palbociclib
				Sunitinib
				Temsirolimus
				Trastuzumab and Pertuzumab
				Vemurafenib and Cobimetinib
				Vismodegib
				Cetuximab
				Dasatinib
				Regorafenib
				Olaparib
CCND1	NCT00566800	Erlotinib in Treating Patients With Barrett Esophagus	Esophageal Cancer	erlotinib hydrochloride	1	1
			Precancerous Condition
CCND1	NCT01037790	PHASE II TRIAL OF THE CYCLIN-DEPEDENT KINASE INHIBITOR PD 0332991 IN PATIENTS WITH CANCER	Adenocarcinoma of the Colon	PD-0332991	1	1
			Adenocarcinoma of the Rectum
			Adult Central Nervous System Germ Cell Tumor
			Adult Solid Tumor
			Adult Teratoma
			Benign Teratoma
			Estrogen Receptor-negative Breast Cancer
			Estrogen Receptor-positive Breast Cancer
			Familial Testicular Germ Cell Tumor
			HER2-negative Breast Cancer
			HER2-positive Breast Cancer
			Male Breast Cancer
			Ovarian Immature Teratoma
			Ovarian Mature Teratoma
			Ovarian Monodermal and Highly Specialized Teratoma
			Progesterone Receptor-negative Breast Cancer
			Progesterone Receptor-positive Breast Cancer
			Recurrent Breast Cancer
			Recurrent Colon Cancer
			Recurrent Extragonadal Germ Cell Tumor
			Recurrent Extragonadal Non-seminomatous Germ Cell Tumor
			Recurrent Extragonadal Seminoma
			Recurrent Malignant Testicular Germ Cell Tumor
			Recurrent Melanoma
			Recurrent Ovarian Germ Cell Tumor
			Recurrent Rectal Cancer
			Stage III Extragonadal Non-seminomatous Germ Cell Tumor
			Stage III Extragonadal Seminoma
			Stage III Malignant Testicular Germ Cell Tumor
			Stage III Ovarian Germ Cell Tumor
			Stage IV Breast Cancer
			Stage IV Colon Cancer
			Stage IV Extragonadal Non-seminomatous Germ Cell Tumor
			Stage IV Extragonadal Seminoma
			Stage IV Melanoma
			Stage IV Ovarian Germ Cell Tumor
			Stage IV Rectal Cancer
			Testicular Immature Teratoma
			Testicular Mature Teratoma
CCND1	NCT02154490	Lung-MAP: Biomarker-Targeted Second-Line Therapy in Treating Patients With Recurrent Stage IV Squamous Cell Lung Cancer	Recurrent Squamous Cell Lung Carcinoma	Docetaxel	1	499
			Stage IV Squamous Cell Lung Carcinoma	Erlotinib Hydrochloride
				FGFR Inhibitor AZD4547
				Palbociclib
				Taselisib
CCND1	NCT02187783	LEE011 for Patients With CDK4/6 Pathway Activated Tumors (SIGNATURE)	Tumors With CDK4/6 Pathway Activation	LEE011	1	30
CCND1	NCT02465060	NCI-MATCH: Targeted Therapy Directed by Genetic Testing in Treating Patients With Advanced Refractory Solid Tumors or Lymphomas	Advanced Malignant Neoplasm	Afatinib	1	835
			Lymphoma	Akt inhibitor AZD5363
			Refractory Malignant Neoplasm	Binimetinib
			Solid Neoplasm	Crizotinib
				Dabrafenib
				Dasatinib
				Defactinib
				FGFR Inhibitor AZD4547
				Osimertinib
				Palbociclib
				PI3K-beta Inhibitor GSK2636771
				Sunitinib Malate
				Taselisib
				Trametinib
				Vismodegib
CCND1	NCT02508467	A Phase 1 Study of BLU-554 in Patients With Hepatocellular Carcinoma and Cholangiocarcinoma	Cholangiocarcinoma	BLU-554	1	4
			Hepatocellular Carcinoma (HCC)
CCND1	NCT02572453	AT13387 in Treating Patients With Relapsed or Refractory Anaplastic Large Cell Lymphoma, Mantle Cell Lymphoma, or Diffuse Large B-cell Lymphoma	Anaplastic Large Cell Lymphoma, ALK-Positive	Hsp90 Inhibitor AT13387	1	1
			Recurrent Anaplastic Large Cell Lymphoma
			Recurrent Diffuse Large B-Cell Lymphoma
			Recurrent Mantle Cell Lymphoma
			Refractory Anaplastic Large Cell Lymphoma
			Refractory Diffuse Large B-Cell Lymphoma
			Refractory Mantle Cell Lymphoma
CCNE1	NCT02487095	Trial of Topotecan With VX-970, an ATR Kinase Inhibitor, in Small Cell Lung Cancer	Carcinoma, Neuroendocrine	Topotecan	8	1
			Carcinoma, Non-Small -Cell Lung	VX-970
			Ovarian Neoplasms
			Small Cell Lung Carcinoma
			Uterine Cervical Neoplasms
CDK4	NCT01037790	PHASE II TRIAL OF THE CYCLIN-DEPEDENT KINASE INHIBITOR PD 0332991 IN PATIENTS WITH CANCER	Adenocarcinoma of the Colon	PD-0332991	2	1
			Adenocarcinoma of the Rectum
			Adult Central Nervous System Germ Cell Tumor
			Adult Solid Tumor
			Adult Teratoma
			Benign Teratoma
			Estrogen Receptor-negative Breast Cancer
			Estrogen Receptor-positive Breast Cancer
			Familial Testicular Germ Cell Tumor
			HER2-negative Breast Cancer
			HER2-positive Breast Cancer
			Male Breast Cancer
			Ovarian Immature Teratoma
			Ovarian Mature Teratoma
			Ovarian Monodermal and Highly Specialized Teratoma
			Progesterone Receptor-negative Breast Cancer
			Progesterone Receptor-positive Breast Cancer
			Recurrent Breast Cancer
			Recurrent Colon Cancer
			Recurrent Extragonadal Germ Cell Tumor
			Recurrent Extragonadal Non-seminomatous Germ Cell Tumor
			Recurrent Extragonadal Seminoma
			Recurrent Malignant Testicular Germ Cell Tumor
			Recurrent Melanoma
			Recurrent Ovarian Germ Cell Tumor
			Recurrent Rectal Cancer
			Stage III Extragonadal Non-seminomatous Germ Cell Tumor
			Stage III Extragonadal Seminoma
			Stage III Malignant Testicular Germ Cell Tumor
			Stage III Ovarian Germ Cell Tumor
			Stage IV Breast Cancer
			Stage IV Colon Cancer
			Stage IV Extragonadal Non-seminomatous Germ Cell Tumor
			Stage IV Extragonadal Seminoma
			Stage IV Melanoma
			Stage IV Ovarian Germ Cell Tumor
			Stage IV Rectal Cancer
			Testicular Immature Teratoma
			Testicular Mature Teratoma
CDK4	NCT01111188	Trial of PD 0332991 Plus Bortezomib in Patients With Relapsed Mantle Cell Lymphoma	Mantle Cell Lymphoma	PD 0332991	2	1
				bortezomib
CDK4	NCT01522989	PD-0332991, 5-FU, and Oxaliplatin for Advanced Solid Tumor Malignancies	Advanced Solid Tumor Malignancies	PD-0332991	2	1
				5-FU
				Oxaliplatin
CDK4	NCT01536743	A Open Label Study of the Efficacy and Safety of PD0332991 a Selective Inhibitor of the Cyclin Dependent Kinases 4 and 6 in Patients With Recurrent Ovarian Cancer Demonstrating Rb-proficiency and Low p16 Expression	Ovarian Epithelial Carcinoma	PD0332991	2	1
CDK4	NCT01857193	Phase Ib Trial of LEE011 With Everolimus (RAD001) and Exemestane in the Treatment of Hormone Receptor Positive HER2 Negative Advanced Breast Cancer	Breast Cancer	LEE011	2	4
				Exemestane
				Everolimus
CDK4	NCT01864746	A Study of Palbociclib in Addition to Standard Endocrine Treatment in Hormone Receptor Positive Her2 Normal Patients With Residual Disease After Neoadjuvant Chemotherapy and Surgery	Breast Cancer	Palbociclib PD-0332991	2	1
			CPS-EG Score	Placebo
			Her2-normal
			Hormonreceptor Positive
			Postneoadjuvant Treatment With CDK 4/6 Inhibitor
CDK4	NCT01872260	Study of LEE011, BYL719 and Letrozole in Advanced ER+ Breast Cancer	Breast Cancer	LEE011	2	10
				Letrozole
				BYL719
CDK4	NCT02022982	PALBOCICLIB + PD-0325901 for NSCLC & Solid Tumors	KRAS Mutant Non-Small Cell Lung Cancer	Palbociclib	2	1
			Solid Tumors	PD-0325901
CDK4	NCT02088684	Study of LEE011 With Fulvestrant and BYL719 or BKM120 in Advanced Breast Cancer	Breast Cancer	LEE011	2	3
				BYL719
				fulvestrant
				BKM120
CDK4	NCT02154490	Lung-MAP: Biomarker-Targeted Second-Line Therapy in Treating Patients With Recurrent Stage IV Squamous Cell Lung Cancer	Recurrent Squamous Cell Lung Carcinoma	Docetaxel	2	499
			Stage IV Squamous Cell Lung Carcinoma	Erlotinib Hydrochloride
				FGFR Inhibitor AZD4547
				Palbociclib
				Taselisib
CDK4	NCT02187783	LEE011 for Patients With CDK4/6 Pathway Activated Tumors (SIGNATURE)	Tumors With CDK4/6 Pathway Activation	LEE011	2	30
CDK4	NCT02255461	Palbociclib Isethionate in Treating Younger Patients With Recurrent, Progressive, or Refractory Central Nervous System Tumors	Childhood Choroid Plexus Tumor	palbociclib isethionate	2	11
			Childhood Ependymoblastoma
			Childhood Grade III Meningioma
			Childhood High-grade Cerebellar Astrocytoma
			Childhood High-grade Cerebral Astrocytoma
			Childhood Medulloepithelioma
			Recurrent Childhood Anaplastic Astrocytoma
			Recurrent Childhood Anaplastic Oligoastrocytoma
			Recurrent Childhood Anaplastic Oligodendroglioma
			Recurrent Childhood Brain Stem Glioma
			Recurrent Childhood Cerebellar Astrocytoma
			Recurrent Childhood Cerebral Astrocytoma
			Recurrent Childhood Giant Cell Glioblastoma
			Recurrent Childhood Glioblastoma
			Recurrent Childhood Gliomatosis Cerebri
			Recurrent Childhood Gliosarcoma
			Recurrent Childhood Medulloblastoma
			Recurrent Childhood Pineoblastoma
			Recurrent Childhood Supratentorial Primitive Neuroectodermal Tumor
CDK4	NCT02278120	Study of Efficacy and Safety in Premenopausal Women With Hormone Receptor Positive, HER2-negative Advanced Breast Cancer	Advanced, Metastatic Breast Cancer	LEE011	2	67
				Tamoxifen
				Letrozole
				Anastrozole
				Goserelin
				LEE011 Placebo
CDK4	NCT02292550	Study of Safety and Efficacy of LEE011 and Ceritinib in Patients With ALK-positive Non-small Cell Lung Cancer.	Non-small Cell Lung Cancer	LEE011	2	2
				Ceritinib
CDK4	NCT02300987	A Randomized, Blinded, Placebo-controlled, Phase II Trial of LEE011 in Patients With Relapsed, Refractory, Incurable Teratoma With Recent Progression	Teratoma	LEE011	2	1
				LEE011 Placebo
CDK4	NCT02345824	Early-Phase Study to Assess Inhibitor Ribociclib in Patients With Recurrent Glioblastoma or Anaplastic Glioma	Glioblastoma	Ribociclib	2	1
			Glioma
CDK4	NCT02422615	Study of Efficacy and Safety of LEE011 in Men and Postmenopausal Women With Advanced Breast Cancer.	Antineoplastic Agents	Ribociclib	2	43
			Antineoplastic Agents, Hormonal	fulvestrant
			Breast Diseases	Ribociclib placebo
			Breast Neoplasms
			Estrogen Receptor Antagonists
			Fulvestrant
			Hormone Antagonists
			Hormones, Hormone Substitutes, and Hormone Antagonists
			Molecular Mechanisms of Pharmacological Action
			Neoplasms
			Neoplasms by Site
			Pharmacologic Actions
			Therapeutic Use
CDK4	NCT02441946	A Neoadjuvant Study of Abemaciclib (LY2835219) in Postmenopausal Women With Hormone Receptor Positive, HER2 Negative Breast Cancer	Breast Cancer	Abemaciclib	2	23
			Early-Stage Breast Carcinoma	Loperamide
			Hormone Receptor Positive Tumor	Anastrozole
CDK4	NCT02450539	A Study of Abemaciclib (LY2835219) in Participants With Stage IV Squamous Non-small Cell Lung Cancer	Non-Small Cell Lung Cancer Stage IV	Abemaciclib	2	7
				Docetaxel
CDK4	NCT02494921	LEE011 (Ribociclib) in Combination With Docetaxel Plus Prednisone in mCRPC	Prostate Cancer	Docetaxel	2	1
				Ribociclib
				Prednisone
				Filgrastim
CDK4	NCT02499770	G1T28 (CDK 4/6 Inhibitor) in Combination With Etoposide and Carboplatin in Extensive Stage Small Cell Lung Cancer (SCLC)	Small Cell Lung Cancer	G1T28 + carboplatin/ etoposide	2	11
				Placebo + carboplatin/ etoposide
CDK4	NCT02501902	Dose-Escalation Study Of Palbociclib + Nab-Paclitaxel In mPDAC	Metastatic Pancreatic Ductal Adenocarcinoma	Palbociclib	2	15
				Nab-Paclitaxel
CDK4	NCT02514447	Study of G1T28 in Patients With Previously Treated Extensive Stage SCLC Receiving Topotecan Chemotherapy	Small Cell Lung Cancer	G1T28 + Topotecan	2	16
CDK4	NCT02607124	A Phase I/II Study of Ribociclib,a CDK4/6 Inhibitor, Following Radiation Therapy	Bithalamic High Grade Glioma	Ribociclib	2	1
			Diffuse Intrinsic Pontine Glioma
			High Grade Glioma
CDK4	NCT02632045	Study of Efficacy of Ribociclib After Progression on CDK4/6 Inhibition in Patients With HR+ H2N- Advanced Breast Cancer	Breast Carcinoma	LEE-011	2	1
			Metastatic Breast Cancer	Fulvestrant
				Placebo
CDK4	NCT02644460	Abemaciclib in Children With DIPG or Recurrent/Refractory Solid Tumors	Brain Tumor, Recurrent	Abemaciclib	2	2
			Diffuse Intrinsic Pontine Glioma
			Ewing Sarcoma, Recurrent, Refractory
			Neuroblastoma, Recurrent, Refractory
			Osteosarcoma, Recurrent, Refractory
			Rhabdoid Tumor, Recurrent, Refractory
			Rhabdomyosarcoma, Recurrent, Refractory
			Solid Tumor, Recurrent
CDK4	NCT02657343	An Open-Label, Phase Ib/II Clinical Trial Of Cdk 4/6 Inhibitor, Ribociclib (Lee011), In Combination With Trastuzumab Or T-Dm1 For Advanced/Metastatic Her2-Positive Breast Cancer.	Breast Cancer	Ribociclib	2	1
				T-DM1
				Trastuzumab
CDK4	NCT02693535	TAPUR: Testing the Use of Food and Drug Administration (FDA) Approved Drugs That Target a Specific Abnormality in a Tumor Gene in People With Advanced Stage Cancer	Advanced Solid Tumors	Erlotinib	2	3
			Lymphoma, Non-Hodgkin	Axitinib
			Multiple Myeloma	Bosutinib
				Crizotinib
				Palbociclib
				Sunitinib
				Temsirolimus
				Trastuzumab and Pertuzumab
				Vemurafenib and Cobimetinib
				Vismodegib
				Cetuximab
				Dasatinib
				Regorafenib
				Olaparib
CDK4	NCT02785939	Lung-MAP: Palbociclib as Second-Line Therapy in Treating Patients With Recurrent Stage IV Squamous Cell Lung Cancer and Positive Biomarker Matches	Recurrent Squamous Cell Lung Carcinoma	Palbociclib	2	1008
			Stage IV Squamous Cell Lung Carcinoma
CTNNB1	NCT01265030	A Pilot Study Evaluating the Use of mTor Inhibitor Sirolimus in Children and Young Adults With Desmoid-Type Fibromatosis	Desmoid Tumor	Sirolimus	46	4
DDR2	NCT02219711	Phase 1/1b Study of MGCD516 in Patients With Advanced Cancer	Advanced Cancer	MGCD516	1	16
DDR2	NCT02465060	NCI-MATCH: Targeted Therapy Directed by Genetic Testing in Treating Patients With Advanced Refractory Solid Tumors or Lymphomas	Advanced Malignant Neoplasm	Afatinib	1	835
			Lymphoma	Akt inhibitor AZD5363
			Refractory Malignant Neoplasm	Binimetinib
			Solid Neoplasm	Crizotinib
				Dabrafenib
				Dasatinib
				Defactinib
				FGFR Inhibitor AZD4547
				Osimertinib
				Palbociclib
				PI3K-beta Inhibitor GSK2636771
				Sunitinib Malate
				Taselisib
				Trametinib
				Vismodegib
EGFR	NCT00054496	Erlotinib in Treating Patients With Recurrent or Progressive Glioblastoma Multiforme	Brain and Central Nervous System Tumors	erlotinib hydrochloride	17	1
EGFR	NCT00292955	Cetuximab, Cisplatin, and Radiotherapy in Women With Locally Advanced Cervical Carcinoma	Cancer of the Cervix	Cetuximab	17	1
EGFR	NCT00566800	Erlotinib in Treating Patients With Barrett Esophagus	Esophageal Cancer	erlotinib hydrochloride	17	1
			Precancerous Condition
EGFR	NCT00863122	Concentration and Activity of Lapatinib in Vestibular Schwannomas	Acoustic Neuroma	lapatinib	17	7
			Auditory Tumor
			NF2
			Neurofibromatosis 2
			Vestibular Schwannoma
EGFR	NCT00902044	Her2 Chimeric Antigen Receptor Expressing T Cells in Advanced Sarcoma	Sarcoma	Fludarabine	17	2
				Cyclophosphamide
EGFR	NCT00904345	Study of Radiation (RT) Concurrent With Cetuximab in Patients With Advanced Head and Neck Squamous Cell Carcinoma (SCC)	Head and Neck Cancer	Cetuximab	17	2
EGFR	NCT00939523	Targeted Therapy With Lapatinib in Patients With Recurrent Pituitary Tumors Resistant to Standard Therapy	Pituitary Adenomas	Lapatinib	17	1
			Prolactinomas
EGFR	NCT00950365	Pharmacodynamic Separation of Pemetrexed and Erlotinib as Second-line Therapy in Patients With Advanced Non-small Cell Lung Cancer (NSCLC)	Non-small Cell Lung Cancer	Pemetrexed	17	3
				pemetrexed and erlotinib
EGFR	NCT00970502	Erlotinib, Celecoxib and Reirradiation for Recurrent Head and Neck Cancer	Cancer of the Head	erlotinib + celecoxib	17	1
			Cancer of the Larynx
			Cancer of the Neck
			Cancer of the Pharynx
			Paranasal Sinus Neoplasms
EGFR	NCT01116336	Phase I Chemoprevention Trial With Green Tea Polyphenon E & Erlotinib in Patients With Premalignant Lesions of the Head & Neck	Cancer of Head and Neck	Erlotinib	17	3
			Neoplasms, Head and Neck
EGFR	NCT01130519	A Phase II Study of Bevacizumab and Erlotinib in Subjects With Advanced Hereditary Leiomyomatosis and Renal Cell Cancer (HLRCC) or Sporadic Papillary Renal Cell Cancer	HLRCC	Bevacizumab	17	1
			Metastatic Papillary RCC	Erlotinib
EGFR	NCT01296555	A Dose Escalation Study Evaluating the Safety and Tolerability of GDC-0032 in Participants With Locally Advanced or Metastatic Solid Tumors or Non-Hodgkin's Lymphoma (NHL) and in Combination With Endocrine Therapy in Locally Advanced or Metastatic Hormone Receptor-Positive Breast Cancer	Non-Hodgkin's Lymphoma, Solid Cancers	Fulvestrant	17	14
				GDC-0032
				Letrozole
EGFR	NCT01306045	Molecular Profiling and Targeted Therapy for Advanced Non-Small Cell Lung Cancer, Small Cell Lung Cancer, and Thymic Malignancies	Carcinoma, Non-Small-Cell Lung	AZD6244	17	2
			Carcinoma, Small Cell Lung	MK-2206
			Carcinoma, Thymic	Lapatinib
				Erlotinib
				Sunitinib
EGFR	NCT01414426	Vandetanib in Preventing Head and Neck Cancer in Patients With Precancerous Head and Neck Lesions	Lip and Oral Cavity Squamous Cell Carcinoma	vandetanib	17	1
			Oral Cavity Verrucous Carcinoma
			Precancerous Condition
EGFR	NCT01494662	HKI-272 for HER2-Positive Breast Cancer and Brain Metastases	Breast Cancer	HKI-272	17	11
				HKI-272
				Capecitabine
EGFR	NCT01532089	Erlotinib With or Without Bevacizumab in Treating Patients With Stage IV Non-Small Cell Lung Cancer With EGFR Mutations	Stage IV Non-small Cell Lung Cancer	erlotinib	17	18
EGFR	NCT01552434	Bevacizumab, Temsirolimus Alone and in Combination With Valproic Acid or Cetuximab in Patients With Advanced Malignancy and Other Indications	Advanced Cancers	Temsirolimus	17	1
				Bevacizumab
				Valproic Acid
				Cetuximab
EGFR	NCT01553942	Afatinib With CT and RT for EGFR-Mutant NSCLC	Lung Cancer	Afatinib	17	2
				Cisplatin
				Pemetrexed
EGFR	NCT01573702	Stereotactic Radiosurgery or Other Local Ablation Then Erlotinib in Epidermal Growth Factor Receptor (EGFR)	Non Small Cell Lung Cancer	Erlotinib	17	8
EGFR	NCT01582191	A Phase 1 Trial of Vandetanib (a Multi-kinase Inhibitor of EGFR, VEGFR and RET Inhibitor) in Combination With Everolimus (an mTOR Inhibitor) in Advanced Cancer	Advanced Cancers	Vandetanib	17	1
				Everolimus
EGFR	NCT01620190	Paclitaxel Albumin-Stabilized Nanoparticle Formulation in Treating Patients With Previously Treated Advanced Non-small Cell Lung Cancer	Recurrent Non-Small Cell Lung Carcinoma	Paclitaxel Albumin-Stabilized Nanoparticle Formulation	17	10
			Stage IV Non-Small Cell Lung Cancer
EGFR	NCT01622868	Whole-Brain Radiation Therapy or Stereotactic Radiosurgery With or Without Lapatinib Ditosylate in Treating Patients With Brain Metastasis From HER2-Positive Breast Cancer	HER2 Positive Breast Carcinoma	Lapatinib Ditosylate	17	56
			Invasive Breast Carcinoma
			Metastatic Malignant Neoplasm in the Brain
			Recurrent Breast Carcinoma
			Stage IV Breast Cancer
EGFR	NCT01711658	TRYHARD: Radiation Therapy Plus Cisplatin With or Without Lapatinib in Treating Patients With Head and Neck Cancer.	Non-HPV Locally Advanced Head and Neck Cancer	Cisplatin	17	13
				placebo
				Lapatinib
EGFR	NCT01723774	PD 0332991 and Anastrozole for Stage 2 or 3 Estrogen Receptor Positive and HER2 Negative Breast Cancer	Breast Neoplasms	PD0332991	17	4
				Anastrozole
				Goserelin
EGFR	NCT01730833	Pertuzumab, Trastuzumab, and Paclitaxel Albumin-Stabilized Nanoparticle Formulation in Treating Patients With HER2-Positive Advanced Breast Cancer	Breast Adenocarcinoma	paclitaxel albumin-stabilized nanoparticle formulation	17	3
			HER2-positive Breast Cancer
			Inflammatory Breast Carcinoma
			Recurrent Breast Cancer
			Stage IIA Breast Cancer
			Stage IIB Breast Cancer
			Stage IIIA Breast Cancer
			Stage IIIB Breast Cancer
			Stage IIIC Breast Cancer
			Stage IV Breast Cancer
EGFR	NCT01746251	Adjuvant Afatinib in Stage I-III NSCLC With EGFR Mutation	Non Small Cell Lung Cancer	Afatinib	17	4
EGFR	NCT01750918	BRAF/MEK/EGFR Inhibitor Combination Study in Colorectal Cancer (CRC)	Cancer	Dabrafenib	17	7
				Trametinib
				Panitumumab
				5-fluorouracil
EGFR	NCT01779050	Effect of Trastuzumab on Disease Free Survival in Early Stage HER2-Negative Breast Cancer Patients With ERBB2 Expressing Disseminated Tumor Cells	Breast Neoplasms	Doxorubicin	17	1
				Cyclophosphamide
				Paclitaxel
				Epirubicin
				Docetaxel
				Carboplatin
				Fluorouracil
EGFR	NCT01822496	Erlotinib Hydrochloride or Crizotinib and Chemoradiation Therapy in Treating Patients With Stage III Non-small Cell Lung Cancer	Stage IIIA Non-Small Cell Lung Cancer	Carboplatin	17	113
			Stage IIIB Non-Small Cell Lung Cancer	Cisplatin
				Crizotinib
				Erlotinib Hydrochloride
				Etoposide
				Paclitaxel
EGFR	NCT01829217	Sunitinib in Never-Smokers With Lung Adenocarcinoma	Lung Cancer	Sunitinib	17	4
EGFR	NCT01854034	Phase 2 Study of AUY922 in NSCLC Patients With Exon 20 Insertion Mutations in EGFR	Non Small Cell Lung Cancer	AUY922	17	3
EGFR	NCT01857271	Erlotinib Hydrochloride Before Surgery in Treating Patients With Stage III Non-Small Cell Lung Cancer	Stage IIIA Non-Small Cell Lung Cancer	Erlotinib Hydrochloride	17	2
			Stage IIIB Non-Small Cell Lung Cancer
EGFR	NCT01859026	A Phase I/IB Trial of MEK162 in Combination With Erlotinib in NSCLC Harboring KRAS or EGFR Mutation	Lung Cancer	MEK162	17	1
			Non-Small Cell Lung Cancer	Erlotinib
EGFR	NCT01862081	A Dose-escalation Study to Assess the Safety, Tolerability, and Pharmacokinetics of GDC-0032 in Combination With Docetaxel or With Paclitaxel in Patients With HER2-negative Locally Recurrent or Metastatic Breast Cancer or Non-small Cell Lung Cancer	Breast Cancer, Non-small Lung Cancer	Docetaxel	17	9
				GDC-0032
				Paclitaxel
EGFR	NCT01873833	Capecitabine, Cyclophosphamide, Lapatinib Ditosylate, and Trastuzumab in Treating Patients With HER2-Positive Metastatic Breast Cancer	HER2-positive Breast Cancer	capecitabine	17	1
			Recurrent Breast Cancer	cyclophosphamide
			Stage IV Breast Cancer	lapatinib ditosylate
EGFR	NCT01912963	Phase II Study of Eribulin Mesylate, Trastuzumab, and Pertuzumab in Women With Metastatic, Unresectable Locally Advanced, or Locally Recurrent HER2-Positive Breast Cancer	HER-2 Positive Breast Cancer	Pertuzumab, Trastuzumab and Eribulin	17	2
EGFR	NCT01953926	An Open-label, Phase 2 Study of Neratinib in Patients With Solid Tumors With Somatic Human Epidermal Growth Factor Receptor (EGFR, HER2, HER3) Mutations or EGFR Gene Amplification	Solid Tumors	Neratinib	17	12
EGFR	NCT01962896	A Phase II Study of Sirolimus and Erlotinib in Recurrent/Refractory Germ Cell Tumors	Relapsed / Recurrent Germ Cell Tumors	Erlotinib	17	3
				Sirolimus
EGFR	NCT01964924	Trametinib and Akt Inhibitor GSK2141795 in Treating Patients With Metastatic Triple-Negative Breast Cancer	Estrogen Receptor Negative	Akt Inhibitor GSK2141795	17	8
			HER2/Neu Negative	Trametinib
			Invasive Breast Carcinoma
			Progesterone Receptor Negative
			Recurrent Breast Carcinoma
			Stage IV Breast Cancer
			Triple-Negative Breast Carcinoma
EGFR	NCT01967095	Low Dose Daily Erlotinib in Combination With High Dose Twice Weekly Erlotinib in Patients With EGFR-Mutant Lung Cancer	EGFR-Mutant Lung Cancer	erlotinib	17	5
EGFR	NCT01976169	Phase 1b Study of PD-0332991 in Combination With T-DM1(Trastuzumab-DM1)	Advanced Breast Cancer	PD-0332991 and T-DM1	17	1
EGFR	NCT01999985	Phase I Trial of Afatinib (BIBW 2992) and Dasatinib in Non-small Cell Lung Cancer (NSCLC)	Lung Cancer	Dasatinib - 1A	17	1
			Non-small Cell Lung Cancer (NSCLC)	Afatinib - 1A
				Dasatinib - 1B
				Afatinib - 1B
EGFR	NCT02013219	A Phase 1b Study of Atezolizumab in Combination With Erlotinib or Alectinib in Participants With Non-Small Cell Lung Cancer	Non-Small Cell Lung Cancer	Alectinib	17	10
				Atezolizumab
				Erlotinib
EGFR	NCT02049957	Safety and Efficacy Study of MLN0128 in Combination With Exemestane or Fulvestrant in Postmenopausal Women With ER/PR+ Metastatic Breast Cancer	Breast Cancer	MLN0128	17	27
				Fulvestrant
				Exemestane
EGFR	NCT02053376	A Phase 2 Trial of Regorafenib as A Single Agent in Advanced and Metastatic Biliary Tract Carcinoma/Cholangiocarcinoma Patients Who Have Failed First-line Chemotherapy	Metastatic Biliary Tract Carcinoma	Regorafenib	17	1
EGFR	NCT02060253	Ganetespib, Paclitaxel, Trastuzumab and Pertuzumab for Metastatic Human Epidermal Growth Factor Receptor 2 Positive Breast Cancer	HER2-positive Breast Cancer	ganetespib	17	1
			Male Breast Cancer	paclitaxel
			Recurrent Breast Cancer
			Stage IIIA Breast Cancer
			Stage IIIB Breast Cancer
			Stage IIIC Breast Cancer
			Stage IV Breast Cancer
EGFR	NCT02071862	Study of the Glutaminase Inhibitor CB-839 in Solid Tumors	Fumarate Hydratase (FH)-Deficient Tumors	CB-839	17	12
			Mesothelioma	Pac-CB
			Non Small Cell Lung Cancer	CBE
			Renal Cell Carcinoma	CB-Erl
			Solid Tumors	CBD
			Succinate Dehydrogenase (SDH)-Deficient Gastrointestinal Stromal Tumors (GIST)
			Succinate Dehydrogenase (SDH)-Deficient Non-gastrointestinal Stromal Tumors
			Triple-Negative Breast Cancer
			Tumors Harboring Amplifications in the cMyc Gene
			Tumors Harboring Isocitrate Dehydrogenase-1 (IDH1) and IDH2 Mutations
EGFR	NCT02091141	A Study Evaluating Herceptin/Perjeta, Tarceva, Zelboraf, and Erivedge Treatment Targeted Against Certain Mutations in Cancer Patients	Neoplasms	Erlotinib [Tarceva]	17	38
				Pertuzumab [Perjeta]
				Trastuzumab [Herceptin]
				Vemurafenib [Zelboraf]
				Vismodegib [Erivedge]
EGFR	NCT02091960	A Study to Assess the Efficacy and Safety of Enzalutamide With Trastuzumab in Subjects With Human Epidermal Growth Factor Receptor 2 Positive (HER2+), Androgen Receptor Positive (AR+) Metastatic or Locally Advanced Breast Cancer	Advanced Breast Cancer	enzalutamide	17	20
			HER2 Amplified	trastuzumab
			Human Epidermal Growth Factor Receptor 2 (HER2)
EGFR	NCT02108964	A Phase I/II, Multicenter, Open-label Study of EGFRmut-TKI EGF816, Administered Orally in Adult Patients With EGFRmut Solid Malignancies	Advanced Non-small Cell Lung Cancer (NSCLC)	EGF816	17	2
EGFR	NCT02113813	A Dose Escalation Study of ASP8273 in Subjects With Non-Small-Cell Lung Cancer (NSCLC) Who Have Epidermal Growth Factor Receptor (EGFR) Mutations	Epidermal Growth Factor Receptor Mutations	ASP8273	17	10
			Non-Small-Cell Lung Cancer (NSCLC)	midazolam
EGFR	NCT02120469	Eribulin Mesylate and Everolimus in Treating Patients With Triple-Negative Metastatic Breast Cancer	Breast Adenocarcinoma	everolimus	17	2
			Estrogen Receptor Negative	eribulin mesylate
			HER2/Neu Negative
			Progesterone Receptor-negative
			Stage IV Breast Cancer
			Triple-negative Breast Carcinoma
EGFR	NCT02128906	Radiotherapy With Cisplatin vs. Docetaxel-cetuximab in HNSCC: ERCC1 Biomarker Enrichment and Interaction Design	Squamous Cell Carcinoma	Cisplatin	17	1
				Docetaxel
				Cetuximab
EGFR	NCT02134015	Study of Patritumab in Combination With Erlotinib in Subjects With Locally Advanced or Metastatic Non-Small-Cell Lung Cancer (NSCLC). (HER3-Lung)	Lung Cancer	Patritumab	17	26
			Non Small Cell Lung Cancer.	erlotinib:
				Placebo
EGFR	NCT02139358	Phase I/IIa Trial of Gemcitabine Plus Trastuzumab and Pertuzumab in Previously Treated Metastatic HER2+ Breast Cancer	Breast Cancer	Gemcitabine	17	1
				Trastuzumab
				Pertuzumab
EGFR	NCT02143466	AZD9291 in Combination With Ascending Doses of Novel Therapeutics	Advanced Non Small Cell Lung Cancer	AZD9291 in combination with MEDI4736	17	4
				AZD9291 in combination with AZD6094
				AZD9291 in combinatin with selumetinib
				AZD9291 in combination with selumetinib
				MEDI4736 Flat-Dose
				MEDI4736 in combination with MEDI4736 Flat-Dose plus Tremelimumab
				Selumetinib Continuous (non-Asia only)
EGFR	NCT02158507	Pilot Study of Veliparib (ABT-888) and Lapatinib (Tykerb) in Patients With Metastatic, Triple Negative Breast Cancer	Metastatic Triple Negative Breast Cancer	Combination of Veliparib + Lapatinib	17	1
EGFR	NCT02159495	Genetically Modified T-cell Immunotherapy in Treating Patients With Relapsed or Refractory Acute Myeloid Leukemia	Adult Acute Megakaryoblastic Leukemia (M7)	cyclophosphamide	17	1
			Adult Acute Minimally Differentiated Myeloid Leukemia (M0)	Etoposide
			Adult Acute Monoblastic Leukemia (M5a)	Fludarabine Phosphate
			Adult Acute Monocytic Leukemia (M5b)
			Adult Acute Myeloblastic Leukemia With Maturation (M2)
			Adult Acute Myeloblastic Leukemia Without Maturation (M1)
			Adult Acute Myeloid Leukemia With 11q23 (MLL) Abnormalities
			Adult Acute Myeloid Leukemia With Del(5q)
			Adult Acute Myeloid Leukemia With Inv(16)(p13;q22)
			Adult Acute Myeloid Leukemia With t(16;16)(p13;q22)
			Adult Acute Myeloid Leukemia With t(8;21)(q22;q22)
			Adult Acute Myelomonocytic Leukemia (M4)
			Adult Erythroleukemia (M6a)
[truncated: 4,496 more rows]

## Sheet: Table S10
Table S10. Comprehensive Cancer Drug Panel Report
Gene	Trial ID	Trial Description	Phase	Conditions	Drug Intervention	DrugBank ID	Target	Name	Prices	SNP effects	SNP adverse	Locations
ABL1	NCT00255684	Fludarabine, Cyclophosphamide, and Total-Body Irradiation Followed by Cyclosporine and Mycophenolate Mofetil in Treating Patients Who Are Undergoing a Donor Umbilical Cord Blood Transplant for Hematologic Cancer	N/A	Chronic Myeloproliferative Disorders	MYCOPHENOLATE MOFETIL	DB00619	ABL1	IMATINIB	GLEEVEC 100 MG TABLET USD 41.69;GLEEVEC 400 MG TABLET USD 174.38	-	-	James P. Wilmot Cancer Center at University of Rochester Medical Center,Gordon L. Phillips, MD,Rochester,New York,14642,United States,585-275-4918,
				Graft Versus Host Disease	CYCLOPHOSPHAMIDE	DB01254	ABL1	DASATINIB	SPRYCEL 20 MG TABLET USD 69.56;SPRYCEL 50 MG TABLET USD 139.12;SPRYCEL 70 MG TABLET USD 139.12;SPRYCEL 100 MG TABLET USD 278.24	-	-	-
				Leukemia	FLUDARABINE PHOSPHATE	DB04868	ABL1	NILOTINIB	-	-	-	-
				Lymphoma	CYCLOSPORINE	DB05184	ABL1	XL228	-	-	-	-
				Multiple Myeloma and Plasma Cell Neoplasm	-	DB06616	ABL1	BOSUTINIB	-	-	-	-
				Myelodysplastic Syndromes	-	DB08896	ABL1	REGORAFENIB	-	-	-	-
				Myelodysplastic/Myeloproliferative Neoplasms	-	DB08901	ABL1	PONATINIB	-	-	-	-
ABL1	NCT00397813	Fludarabine Phosphate and Total Body Irradiation Followed by a Donor Peripheral Stem Cell Transplant in Treating Patients With Myelodysplastic Syndromes or Myeloproliferative Disorders	Phase 2	Atypical Chronic Myeloid Leukemia, BCR-ABL1 Negative	MYCOPHENOLATE MOFETIL	DB00619	ABL1	IMATINIB	GLEEVEC 100 MG TABLET USD 41.69;GLEEVEC 400 MG TABLET USD 174.38	-	-	LDS Hospital,Finn B. Petersen,Salt Lake City,Utah,84143,United States,finn.petersen@intermountainmail.org,801-408-3800,
				Chronic Myelomonocytic Leukemia	FLUDARABINE PHOSPHATE	DB01254	ABL1	DASATINIB	SPRYCEL 20 MG TABLET USD 69.56;SPRYCEL 50 MG TABLET USD 139.12;SPRYCEL 70 MG TABLET USD 139.12;SPRYCEL 100 MG TABLET USD 278.24	-	-	Veterans Administration Center-Seattle,Thomas R. Chauncey,Seattle,Washington,98108,United States,tchaunce@washington.edu,206-762-1010,
				Essential Thrombocythemia	CYCLOSPORINE	DB04868	ABL1	NILOTINIB	-	-	-	Fred Hutch/University of Washington Cancer Consortium,Brenda M. Sandmaier,Seattle,Washington,98109,United States,bsandmai@fredhutch.org,206-667-4961,
				Myeloproliferative Neoplasm	-	DB05184	ABL1	XL228	-	-	-	-
				Paroxysmal Nocturnal Hemoglobinuria	-	DB06616	ABL1	BOSUTINIB	-	-	-	-
				Polycythemia Vera	-	DB08896	ABL1	REGORAFENIB	-	-	-	-
				Polycythemia Vera, Post-Polycythemic Myelofibrosis Phase	-	DB08901	ABL1	PONATINIB	-	-	-	-
				Primary Myelofibrosis	-	-	-	-	-	-	-	-
				Refractory Anemia	-	-	-	-	-	-	-	-
				Refractory Anemia With Excess Blasts	-	-	-	-	-	-	-	-
				Refractory Anemia With Ring Sideroblasts	-	-	-	-	-	-	-	-
				Refractory Cytopenia With Multilineage Dysplasia	-	-	-	-	-	-	-	-
				Refractory Cytopenia With Multilineage Dysplasia and Ring Sideroblasts	-	-	-	-	-	-	-	-
				de Novo Myelodysplastic Syndrome	-	-	-	-	-	-	-	-
ABL1	NCT00719888	Umbilical Cord Blood Transplant, Cyclophosphamide, Fludarabine Phosphate, and Total-Body Irradiation in Treating Patients With Hematologic Disease	Phase 2	Acute Biphenotypic Leukemia	MYCOPHENOLATE MOFETIL	DB00619	ABL1	IMATINIB	GLEEVEC 100 MG TABLET USD 41.69;GLEEVEC 400 MG TABLET USD 174.38	-	-	VA Puget Sound Health Care System,Thomas R. Chauncey,Seattle,Washington,98101,United States,tchaunce@u.washington.edu,206-764-2199,
				Acute Myeloid Leukemia Arising From Previous Myelodysplastic Syndrome	CYCLOPHOSPHAMIDE	DB01254	ABL1	DASATINIB	SPRYCEL 20 MG TABLET USD 69.56;SPRYCEL 50 MG TABLET USD 139.12;SPRYCEL 70 MG TABLET USD 139.12;SPRYCEL 100 MG TABLET USD 278.24	-	-	Fred Hutch/University of Washington Cancer Consortium,Colleen Delaney,Seattle,Washington,98109,United States,cdelaney@fredhutch.org,206-667-1385,
				Acute Myeloid Leukemia in Remission	FLUDARABINE PHOSPHATE	DB04868	ABL1	NILOTINIB	-	-	-	-
				Adult Acute Lymphoblastic Leukemia in Complete Remission	CYCLOSPORINE	DB05184	ABL1	XL228	-	-	-	-
				Aggressive Non-Hodgkin Lymphoma	-	DB06616	ABL1	BOSUTINIB	-	-	-	-
				B Acute Lymphoblastic Leukemia With t(1;19)(q23;p13.3); E2A-PBX1 (TCF3-PBX1)	-	DB08896	ABL1	REGORAFENIB	-	-	-	-
				B Acute Lymphoblastic Leukemia With t(9;22)(q34;q11.2); BCR-ABL1	-	DB08901	ABL1	PONATINIB	-	-	-	-
				Burkitt Lymphoma	-	-	-	-	-	-	-	-
				Childhood Acute Lymphoblastic Leukemia in Complete Remission	-	-	-	-	-	-	-	-
				Chronic Phase Chronic Myelogenous Leukemia, BCR-ABL1 Positive	-	-	-	-	-	-	-	-
				Lymphoblastic Lymphoma	-	-	-	-	-	-	-	-
				Mantle Cell Lymphoma	-	-	-	-	-	-	-	-
				Myelofibrosis	-	-	-	-	-	-	-	-
				Pancytopenia	-	-	-	-	-	-	-	-
				Plasma Cell Myeloma	-	-	-	-	-	-	-	-
				Prolymphocytic Leukemia	-	-	-	-	-	-	-	-
				Recurrent Childhood Acute Myeloid Leukemia	-	-	-	-	-	-	-	-
				Recurrent Chronic Lymphocytic Leukemia	-	-	-	-	-	-	-	-
				Recurrent Chronic Myelogenous Leukemia, BCR-ABL1 Positive	-	-	-	-	-	-	-	-
				Recurrent Follicular Lymphoma	-	-	-	-	-	-	-	-
				Recurrent Lymphoplasmacytic Lymphoma	-	-	-	-	-	-	-	-
				Recurrent Marginal Zone Lymphoma	-	-	-	-	-	-	-	-
				Recurrent Small Lymphocytic Lymphoma	-	-	-	-	-	-	-	-
				Refractory Anemia With Excess Blasts	-	-	-	-	-	-	-	-
ABL1	NCT00723099	Donor Umbilical Cord Blood Transplant in Treating Patients With Hematologic Cancer	Phase 2	Acute Biphenotypic Leukemia	MYCOPHENOLATE MOFETIL	DB00619	ABL1	IMATINIB	GLEEVEC 100 MG TABLET USD 41.69;GLEEVEC 400 MG TABLET USD 174.38	-	-	Colorado Blood Cancer Institute,Michael B. Maris,Denver,Colorado,80218,United States,Juli.Murphy@HealthONEcares.com,720-754-4890,
				Acute Lymphoblastic Leukemia	CYCLOPHOSPHAMIDE	DB01254	ABL1	DASATINIB	SPRYCEL 20 MG TABLET USD 69.56;SPRYCEL 50 MG TABLET USD 139.12;SPRYCEL 70 MG TABLET USD 139.12;SPRYCEL 100 MG TABLET USD 278.24	-	-	LDS Hospital,Finn B. Petersen,Salt Lake City,Utah,84143,United States,finn.petersen@intermountainmail.org,303-388-4876,
				Acute Myeloid Leukemia	FLUDARABINE PHOSPHATE	DB04868	ABL1	NILOTINIB	-	-	-	VA Puget Sound Health Care System,Thomas R. Chauncey,Seattle,Washington,98101,United States,tchaunce@u.washington.edu,206-764-2709,
				Aggressive Non-Hodgkin Lymphoma	CYCLOSPORINE	DB05184	ABL1	XL228	-	-	-	Fred Hutch/University of Washington Cancer Consortium,Rachel B. Salit,Seattle,Washington,98109,United States,rsalit@fredhutch.org,206-667-1317,
				Chronic Myelogenous Leukemia, BCR-ABL1 Positive	-	DB06616	ABL1	BOSUTINIB	-	-	-	-
				Chronic Phase Chronic Myelogenous Leukemia, BCR-ABL1 Positive	-	DB08896	ABL1	REGORAFENIB	-	-	-	-
				Indolent Non-Hodgkin Lymphoma	-	DB08901	ABL1	PONATINIB	-	-	-	-
				Malignant Lymphoma, Large Cell Type	-	-	-	-	-	-	-	-
				Mixed Phenotype Acute Leukemia	-	-	-	-	-	-	-	-
				Myelodysplastic Syndrome	-	-	-	-	-	-	-	-
				Myeloproliferative Neoplasm	-	-	-	-	-	-	-	-
				Recurrent Chronic Lymphocytic Leukemia	-	-	-	-	-	-	-	-
				Recurrent Follicular Lymphoma	-	-	-	-	-	-	-	-
				Recurrent Lymphoplasmacytic Lymphoma	-	-	-	-	-	-	-	-
				Recurrent Mantle Cell Lymphoma	-	-	-	-	-	-	-	-
				Recurrent Marginal Zone Lymphoma	-	-	-	-	-	-	-	-
				Recurrent Plasma Cell Myeloma	-	-	-	-	-	-	-	-
				Recurrent Small Lymphocytic Lymphoma	-	-	-	-	-	-	-	-
				Recurrent T-Cell Non-Hodgkin Lymphoma	-	-	-	-	-	-	-	-
				Refractory Chronic Lymphocytic Leukemia	-	-	-	-	-	-	-	-
				Refractory Chronic Myelogenous Leukemia, BCR-ABL1 Positive	-	-	-	-	-	-	-	-
				Refractory Follicular Lymphoma	-	-	-	-	-	-	-	-
				Refractory Hodgkin Lymphoma	-	-	-	-	-	-	-	-
				Refractory Lymphoplasmacytic Lymphoma	-	-	-	-	-	-	-	-
				Refractory Mantle Cell Lymphoma	-	-	-	-	-	-	-	-
				Refractory Small Lymphocytic Lymphoma	-	-	-	-	-	-	-	-
				T-Cell Non-Hodgkin Lymphoma	-	-	-	-	-	-	-	-
ABL1	NCT00796068	Treosulfan, Fludarabine Phosphate, and Total-Body Irradiation in Treating Patients With Hematological Cancer Who Are Undergoing Umbilical Cord Blood Transplant	Phase 2	Acute Biphenotypic Leukemia	MYCOPHENOLATE MOFETIL	DB00619	ABL1	IMATINIB	GLEEVEC 100 MG TABLET USD 41.69;GLEEVEC 400 MG TABLET USD 174.38	-	-	Fred Hutch/University of Washington Cancer Consortium,Filippo Milano,Seattle,Washington,98109,United States,fmilano@fredhutch.org,206-667-5925,
				Adult Acute Lymphoblastic Leukemia in Remission	TREOSULFAN	DB01254	ABL1	DASATINIB	SPRYCEL 20 MG TABLET USD 69.56;SPRYCEL 50 MG TABLET USD 139.12;SPRYCEL 70 MG TABLET USD 139.12;SPRYCEL 100 MG TABLET USD 278.24	-	-	-
				Adult Acute Myeloid Leukemia in Remission	FLUDARABINE PHOSPHATE	DB04868	ABL1	NILOTINIB	-	-	-	-
				Adult Myelodysplastic Syndrome	CYCLOSPORINE	DB05184	ABL1	XL228	-	-	-	-
				Childhood Acute Lymphoblastic Leukemia in Remission	-	DB06616	ABL1	BOSUTINIB	-	-	-	-
				Childhood Acute Myeloid Leukemia in Remission	-	DB08896	ABL1	REGORAFENIB	-	-	-	-
				Childhood Chronic Myelogenous Leukemia, BCR-ABL1 Positive	-	DB08901	ABL1	PONATINIB	-	-	-	-
				Childhood Myelodysplastic Syndrome	-	-	-	-	-	-	-	-
				Chronic Phase Chronic Myelogenous Leukemia, BCR-ABL1 Positive	-	-	-	-	-	-	-	-
				Recurrent Chronic Myelogenous Leukemia, BCR-ABL1 Positive	-	-	-	-	-	-	-	-
				Refractory Anemia With Excess Blasts	-	-	-	-	-	-	-	-
				Refractory Chronic Myelogenous Leukemia, BCR-ABL1 Positive	-	-	-	-	-	-	-	-
ABL1	NCT01190930	Risk-Adapted Chemotherapy in Treating Younger Patients With Newly Diagnosed Standard-Risk Acute Lymphoblastic Leukemia or Localized B-Lineage Lymphoblastic Lymphoma	Phase 3	Adult B Lymphoblastic Lymphoma	CYTARABINE	DB00619	ABL1	IMATINIB	GLEEVEC 100 MG TABLET USD 41.69;GLEEVEC 400 MG TABLET USD 174.38	-	-	Children's Hospital of Alabama,Alyssa T. Reddy,Birmingham,Alabama,35233,United States,ctsucontact@westat.com,888-823-5923,
				Childhood B Acute Lymphoblastic Leukemia	MERCAPTOPURINE	DB01254	ABL1	DASATINIB	SPRYCEL 20 MG TABLET USD 69.56;SPRYCEL 50 MG TABLET USD 139.12;SPRYCEL 70 MG TABLET USD 139.12;SPRYCEL 100 MG TABLET USD 278.24	-	-	Providence Alaska Medical Center,Brenda J. Wittman,Anchorage,Alaska,99508,United States,907-261-3109,
				Childhood B Acute Lymphoblastic Leukemia With t(9;22)(q34;q11.2); BCR-ABL1	CYCLOPHOSPHAMIDE	DB04868	ABL1	NILOTINIB	-	-	-	Cardon Children's Medical Center,Xiaxin Li,Mesa,Arizona,85202,United States,602-747-9738,
				Childhood B Lymphoblastic Lymphoma	THIOGUANINE	DB05184	ABL1	XL228	-	-	-	Phoenix Childrens Hospital,Jessica Boklan,Phoenix,Arizona,85016,United States,602-546-0920,
				Down Syndrome	METHOTREXATE	DB06616	ABL1	BOSUTINIB	-	-	-	The University of Arizona Medical Center-University Campus,Lisa M. Kopp,Tucson,Arizona,85724,United States,520-626-9008,
				Stage I B Lymphoblastic Lymphoma	DEXAMETHASONE	DB08896	ABL1	REGORAFENIB	-	-	-	Arkansas Children's Hospital,David L. Becton,Little Rock,Arkansas,72202-3591,United States,501-364-7373,
				Stage II B Lymphoblastic Lymphoma	LEUCOVORIN CALCIUM	DB08901	ABL1	PONATINIB	-	-	-	Southern California Permanente Medical Group,Robert M. Cooper,Downey,California,90242,United States,626-564-3455,
				Untreated Adult Acute Lymphoblastic Leukemia	DOXORUBICIN HYDROCHLORIDE	-	-	-	-	-	-	City of Hope Comprehensive Cancer Center,Anne L. Angiolillo,Duarte,California,91010,United States,
				Untreated Childhood Acute Lymphoblastic Leukemia	PEGASPARGASE	-	-	-	-	-	-	Loma Linda University Medical Center,Albert Kheradpour,Loma Linda,California,92354,United States,909-558-3375,
				-	VINCRISTINE SULFATE	-	-	-	-	-	-	Miller Children's and Women's Hospital Long Beach,Cecilia H. Fu,Long Beach,California,90806,United States,323-361-4110,
				-	-	-	-	-	-	-	-	Children's Hospital Los Angeles,Leo Mascarenhas,Los Angeles,California,90027,United States,323-361-4110,
				-	-	-	-	-	-	-	-	Cedars-Sinai Medical Center,Fataneh (Fae) Majlessipour,Los Angeles,California,90048,United States,310-423-8965,
				-	-	-	-	-	-	-	-	David Geffen School of Medicine at UCLA,Pamela H. Kempert,Los Angeles,California,90095,United States,310-825-6708,
				-	-	-	-	-	-	-	-	Mattel Children's Hospital UCLA,Pamela H. Kempert,Los Angeles,California,90095,United States,310-825-6708,
				-	-	-	-	-	-	-	-	Children's Hospital Central California,Vonda L. Crouse,Madera,California,93636-8762,United States,866-353-5437,
				-	-	-	-	-	-	-	-	Children's Hospital and Research Center at Oakland,Carla B. Golden,Oakland,California,94609-1809,United States,510-450-7600,
				-	-	-	-	-	-	-	-	Kaiser Permanente-Oakland,Steven K. Bergstrom,Oakland,California,94611,United States,626-564-3455,
				-	-	-	-	-	-	-	-	Childrens Hospital of Orange County,Violet Shen,Orange,California,92868,United States,714-997-3000,
				-	-	-	-	-	-	-	-	Lucile Packard Children's Hospital Stanford University,Neyssa M. Marina,Palo Alto,California,94304,United States,clinicaltrials@med.stanford.edu,650-498-7061,
				-	-	-	-	-	-	-	-	Sutter General Hospital,Yung S. Yim,Sacramento,California,95816,United States,bernicl@sutterhealth.org,415-209-2686,
				-	-	-	-	-	-	-	-	University of California Davis Comprehensive Cancer Center,Jay Michael S. Balagtas,Sacramento,California,95817,United States,916-734-3089,
				-	-	-	-	-	-	-	-	Rady Children's Hospital - San Diego,William D. Roberts,San Diego,California,92123,United States,858-966-5934,
				-	-	-	-	-	-	-	-	Naval Medical Center -San Diego,Joanne F. McManaman,San Diego,California,92134,United States,619-532-8712,
				-	-	-	-	-	-	-	-	UCSF Medical Center-Mission Bay,Mignon L. Loh,San Francisco,California,94158,United States,877-827-3222,
				-	-	-	-	-	-	-	-	Santa Barbara Cottage Hospital,Daniel J. Greenfield,Santa Barbara,California,93102,United States,805-682-7300,
				-	-	-	-	-	-	-	-	Los Angeles Biomedical Research Institute at Harbor-UCLA Medical Center,Joseph L. Lasky,Torrance,California,90502,United States,888-662-8252,
				-	-	-	-	-	-	-	-	Children's Hospital Colorado,Kelly W. Maloney,Aurora,Colorado,80045,United States,720-777-6672,
				-	-	-	-	-	-	-	-	Rocky Mountain Hospital for Children-Presbyterian Saint Luke's Medical Center,Jennifer J. Clark,Denver,Colorado,80218,United States,866-775-6246,
				-	-	-	-	-	-	-	-	Connecticut Children's Medical Center,Michael S. Isakoff,Hartford,Connecticut,06106,United States,860-545-9981,
				-	-	-	-	-	-	-	-	Yale University,Nina S. Kadan-Lottick,New Haven,Connecticut,06520,United States,203-785-5702,
				-	-	-	-	-	-	-	-	Alfred I duPont Hospital for Children,Jeffrey H. Schwartz,Wilmington,Delaware,19803,United States,904-697-3529,
				-	-	-	-	-	-	-	-	MedStar Georgetown University Hospital,Aziza T. Shad,Washington,District of Columbia,20007,United States,202-444-0381,
				-	-	-	-	-	-	-	-	Children's National Medical Center,Jeffrey S. Dome,Washington,District of Columbia,20010,United States,202-884-2549,
				-	-	-	-	-	-	-	-	Broward Health Medical Center,Hector M. Rodriguez-Cortes,Fort Lauderdale,Florida,33316,United States,954-355-5346,
				-	-	-	-	-	-	-	-	Golisano Children's Hospital of Southwest Florida,Emad K. Salman,Fort Myers,Florida,33908,United States,239-343-5333,
				-	-	-	-	-	-	-	-	University of Florida,William B. Slayton,Gainesville,Florida,32610,United States,trials@cancer.ufl.edu,352-273-8675,
				-	-	-	-	-	-	-	-	Memorial Regional Hospital/Joe DiMaggio Children's Hospital,Iftikhar Hanif,Hollywood,Florida,33021,United States,954-265-2234,
				-	-	-	-	-	-	-	-	Nemours Children's Clinic-Jacksonville,Jeffrey H. Schwartz,Jacksonville,Florida,32207,United States,904-697-3529,
				-	-	-	-	-	-	-	-	University of Miami Miller School of Medicine-Sylvester Cancer Center,Julio C. Barredo,Miami,Florida,33136,United States,Sylvester@emergingmed.com,866-574-5124,
				-	-	-	-	-	-	-	-	Nicklaus Children's Hospital,Enrique A. Escalon,Miami,Florida,33155,United States,888-624-2778,
				-	-	-	-	-	-	-	-	Baptist Hospital of Miami,Doured Daghistani,Miami,Florida,33176,United States,cancerinfo@baptisthealth.net,800-599-2456,
				-	-	-	-	-	-	-	-	Florida Hospital Orlando,Fouad M. Hajjar,Orlando,Florida,32803,United States,407-303-5623,
				-	-	-	-	-	-	-	-	Arnold Palmer Hospital for Children,Vincent F. Giusti,Orlando,Florida,32806,United States,CancerClinicalTrials@orlandohealth.com,321-841-7246,
				-	-	-	-	-	-	-	-	Nemours Children's Hospital,Jeffrey H. Schwartz,Orlando,Florida,32827,United States,904-697-3529,
				-	-	-	-	-	-	-	-	Nemours Children's Clinic - Pensacola,Jeffrey H. Schwartz,Pensacola,Florida,32504,United States,904-697-3529,
				-	-	-	-	-	-	-	-	All Children's Hospital,Gregory A. Hale,Saint Petersburg,Florida,33701,United States,HamblinF@allkids.org,727-767-2423,
				-	-	-	-	-	-	-	-	Tampa General Hospital,Cameron K. Tebbi,Tampa,Florida,33606,United States,hkourtellis@tgh.org,800-882-4123,
				-	-	-	-	-	-	-	-	Saint Mary's Hospital,Narayana Gowda,West Palm Beach,Florida,33407,United States,ctsucontact@westat.com,888-823-5923,
				-	-	-	-	-	-	-	-	Children's Healthcare of Atlanta - Egleston,Frank G. Keller,Atlanta,Georgia,30322,United States,888-785-1112,
				-	-	-	-	-	-	-	-	Georgia Regents University Medical Center,Colleen H. McDonough,Augusta,Georgia,30912,United States,cancer@georgiahealth.edu,706-721-1663,
				-	-	-	-	-	-	-	-	Memorial University Medical Center,J. M. Johnston,Savannah,Georgia,31404,United States,912-350-8568,
				-	-	-	-	-	-	-	-	Kapiolani Medical Center for Women and Children,Robert W. Wilkinson,Honolulu,Hawaii,96826,United States,808-983-6090,
				-	-	-	-	-	-	-	-	Tripler Army Medical Center,Tonya M. Kratovil,Honolulu,Hawaii,96859,United States,808-433-6336,
				-	-	-	-	-	-	-	-	Saint Luke's Mountain States Tumor Institute,Eugenia Chang,Boise,Idaho,83712,United States,800-845-4624,
				-	-	-	-	-	-	-	-	Lurie Children's Hospital-Chicago,Elaine R. Morgan,Chicago,Illinois,60611,United States,773-880-4562,
				-	-	-	-	-	-	-	-	University of Illinois,Mary L. Schmidt,Chicago,Illinois,60612,United States,312-355-3046,
				-	-	-	-	-	-	-	-	University of Chicago Comprehensive Cancer Center,Susan L. Cohn,Chicago,Illinois,60637,United States,773-834-7424,
				-	-	-	-	-	-	-	-	Loyola University Medical Center,Eugene Suh,Maywood,Illinois,60153,United States,708-226-4357,
				-	-	-	-	-	-	-	-	Advocate Children's Hospital-Oak Lawn,Rebecca E. McFall,Oak Lawn,Illinois,60453,United States,847-723-7570,
				-	-	-	-	-	-	-	-	Advocate Children's Hospital-Park Ridge,Jong-Hyo Kwon,Park Ridge,Illinois,60068,United States,847-384-3621,
				-	-	-	-	-	-	-	-	Saint Jude Midwest Affiliate,Karen S. Fernandez,Peoria,Illinois,61637,United States,309-655-3258,
				-	-	-	-	-	-	-	-	Southern Illinois University School of Medicine,Gregory P. Brandt,Springfield,Illinois,62702,United States,217-545-7929,
				-	-	-	-	-	-	-	-	Riley Hospital for Children,Robert J. Fallon,Indianapolis,Indiana,46202,United States,ctsucontact@westat.com,888-823-5923,
				-	-	-	-	-	-	-	-	Saint Vincent Hospital and Health Services,Bassem I. Razzouk,Indianapolis,Indiana,46260,United States,317-338-2194,
				-	-	-	-	-	-	-	-	Blank Children's Hospital,Wendy L. Woods-Swafford,Des Moines,Iowa,50309,United States,515-241-6729,
				-	-	-	-	-	-	-	-	University of Iowa/Holden Comprehensive Cancer Center,Mariko Sato,Iowa City,Iowa,52242,United States,800-237-1225,
				-	-	-	-	-	-	-	-	University of Kentucky/Markey Cancer Center,Lars M. Wagner,Lexington,Kentucky,40536,United States,859-257-3379,
				-	-	-	-	-	-	-	-	Kosair Children's Hospital,Kenneth G. Lucas,Louisville,Kentucky,40202,United States,866-530-5516,
				-	-	-	-	-	-	-	-	Children's Hospital New Orleans,Lolie C. Yu,New Orleans,Louisiana,70118,United States,504-894-5377,
				-	-	-	-	-	-	-	-	Ochsner Medical Center Jefferson,Craig Lotterman,New Orleans,Louisiana,70121,United States,888-562-4763,
				-	-	-	-	-	-	-	-	Maine Children's Cancer Program,Eric C. Larsen,Scarborough,Maine,04074,United States,wrighd@mmc.org,207-396-8090,
				-	-	-	-	-	-	-	-	University of Maryland/Greenebaum Cancer Center,Teresa A. York,Baltimore,Maryland,21201,United States,800-888-8823,
				-	-	-	-	-	-	-	-	Sinai Hospital of Baltimore,Joseph M. Wiley,Baltimore,Maryland,21215,United States,pridgely@lifebridgehealth.org,410-601-6120,
				-	-	-	-	-	-	-	-	Johns Hopkins University/Sidney Kimmel Cancer Center,Patrick A. Brown,Baltimore,Maryland,21287,United States,jhcccro@jhmi.edu,410-955-8804,
				-	-	-	-	-	-	-	-	Floating Hospital for Children at Tufts Medical Center,Michael J. Kelly,Boston,Massachusetts,02111,United States,ContactUsCancerCenter@TuftsMedicalCenter.org,617-636-5000,
				-	-	-	-	-	-	-	-	Baystate Medical Center,Joanna G. Luty,Springfield,Massachusetts,01199,United States,tamara.wrenn@baystatehealth.org,413-794-3565,
				-	-	-	-	-	-	-	-	University of Massachusetts Medical School,Christopher P. Keuker,Worcester,Massachusetts,01655,United States,cancer.research@umassmed.edu,508-856-3216,
				-	-	-	-	-	-	-	-	C S Mott Children's Hospital,Raymond J. Hutchinson,Ann Arbor,Michigan,48109,United States,800-865-1125,
				-	-	-	-	-	-	-	-	Wayne State University/Karmanos Cancer Institute,Jeffrey W. Taub,Detroit,Michigan,48201,United States,313-576-9363,
				-	-	-	-	-	-	-	-	Saint John Hospital and Medical Center,Hadi Sawaf,Detroit,Michigan,48236,United States,313-343-3166,
				-	-	-	-	-	-	-	-	Michigan State University Clinical Center,Renuka Gera,East Lansing,Michigan,48824-7016,United States,517-975-9547,
				-	-	-	-	-	-	-	-	Helen DeVos Children's Hospital at Spectrum Health,David S. Dickens,Grand Rapids,Michigan,49503,United States,616-267-1925,
				-	-	-	-	-	-	-	-	Bronson Methodist Hospital,Jeffrey S. Lobel,Kalamazoo,Michigan,49007,United States,800-227-2345,
				-	-	-	-	-	-	-	-	Kalamazoo Center for Medical Studies,Jeffrey S. Lobel,Kalamazoo,Michigan,49008,United States,800-227-2345,
				-	-	-	-	-	-	-	-	Children's Hospitals and Clinics of Minnesota - Minneapolis,Michael K. Richards,Minneapolis,Minnesota,55404,United States,612-813-5193,
				-	-	-	-	-	-	-	-	University of Minnesota Medical Center-Fairview,Peter M. Gordon,Minneapolis,Minnesota,55455,United States,612-624-2620,
				-	-	-	-	-	-	-	-	Mayo Clinic,Vilmarie Rodriguez,Rochester,Minnesota,55905,United States,507-538-7623,
				-	-	-	-	-	-	-	-	University of Mississippi Medical Center,Gail C. Megason,Jackson,Mississippi,39216,United States,601-815-6700,
				-	-	-	-	-	-	-	-	The Childrens Mercy Hospital,Maxine L. Hetherington,Kansas City,Missouri,64108,United States,816-234-3265,
				-	-	-	-	-	-	-	-	Cardinal Glennon Children's Medical Center,William S. Ferguson,Saint Louis,Missouri,63104,United States,314-268-4000,
				-	-	-	-	-	-	-	-	Washington University School of Medicine,Robert J. Hayashi,Saint Louis,Missouri,63110,United States,info@siteman.wustl.edu,800-600-3606,
				-	-	-	-	-	-	-	-	Mercy Hospital Saint Louis,Bethany G. Sleckman,Saint Louis,Missouri,63141,United States,913-948-5588,
				-	-	-	-	-	-	-	-	Children's Hospital and Medical Center of Omaha,Minnie Abromowitch,Omaha,Nebraska,68114,United States,402-955-3949,
				-	-	-	-	-	-	-	-	University of Nebraska Medical Center,Minnie Abromowitch,Omaha,Nebraska,68198,United States,402-955-3949,
				-	-	-	-	-	-	-	-	University Medical Center of Southern Nevada,Jonathan Bernstein,Las Vegas,Nevada,89102,United States,702-384-0013,
				-	-	-	-	-	-	-	-	Nevada Cancer Research Foundation CCOP,Jonathan Bernstein,Las Vegas,Nevada,89106,United States,702-384-0013,
				-	-	-	-	-	-	-	-	Children's Specialty Center of Nevada II,Jonathan Bernstein,Las Vegas,Nevada,89109,United States,702-384-0013,
				-	-	-	-	-	-	-	-	Sunrise Hospital and Medical Center,Nik Farahana N. Rashid,Las Vegas,Nevada,89109,United States,702-384-0013,
				-	-	-	-	-	-	-	-	Summerlin Hospital Medical Center,Jonathan Bernstein,Las Vegas,Nevada,89144,United States,702-384-0013,
				-	-	-	-	-	-	-	-	Dartmouth Hitchcock Medical Center,Sara Chaffee,Lebanon,New Hampshire,03756,United States,cancer.research.nurse@dartmouth.edu,800-639-6918,
				-	-	-	-	-	-	-	-	Hackensack University Medical Center,Burton E. Appel,Hackensack,New Jersey,07601,United States,201-996-2879,
				-	-	-	-	-	-	-	-	Morristown Medical Center,Steven L. Halpern,Morristown,New Jersey,07960,United States,973-971-5900,
				-	-	-	-	-	-	-	-	Saint Peter's University Hospital,Stanley Calderwood,New Brunswick,New Jersey,08901,United States,kcovert@saintpetersuh.com,732-745-8600,
				-	-	-	-	-	-	-	-	UMDNJ - Robert Wood Johnson University Hospital,Richard A. Drachtman,New Brunswick,New Jersey,08903,United States,732-235-8675,
				-	-	-	-	-	-	-	-	Saint Joseph's Regional Medical Center,Mary A. Bonilla,Paterson,New Jersey,07503,United States,973-754-2909,
				-	-	-	-	-	-	-	-	Overlook Hospital,Steven L. Halpern,Summit,New Jersey,07902,United States,973-971-5900,
				-	-	-	-	-	-	-	-	University of New Mexico,Anne L. Angiolillo,Albuquerque,New Mexico,87102,United States,
				-	-	-	-	-	-	-	-	University of New Mexico Cancer Center,Koh B. Boayue,Albuquerque,New Mexico,87106,United States,505-272-6972,
				-	-	-	-	-	-	-	-	Albany Medical Center,Vikramjit S. Kanwar,Albany,New York,12208,United States,518-262-3368,
				-	-	-	-	-	-	-	-	Montefiore Medical Center - Moses Campus,Peter D. Cole,Bronx,New York,10467-2490,United States,aecc@aecom.yu.edu,718-904-2730,
				-	-	-	-	-	-	-	-	Winthrop University Hospital,Mark E. Weinblatt,Mineola,New York,11501,United States,866-946-8476,
				-	-	-	-	-	-	-	-	The Steven and Alexandra Cohen Children's Medical Center of New York,Arlene S. Redner,New Hyde Park,New York,11040,United States,718-470-3470,
				-	-	-	-	-	-	-	-	Laura and Issac Perlmutter Cancer Center at NYU Langone,Linda Granowetter,New York,New York,10016,United States,prmc.coordinator@nyumc.org,212-263-4434,
				-	-	-	-	-	-	-	-	Mount Sinai Medical Center,Birte Wistinghausen,New York,New York,10029,United States,jenny.figueroa@mssm.edu,212-824-7320,
				-	-	-	-	-	-	-	-	Weill Medical College of Cornell University,Alexander Aledo,New York,New York,10065,United States,212-746-1848,
				-	-	-	-	-	-	-	-	University of Rochester,Jeffrey R. Andolina,Rochester,New York,14642,United States,585-275-5830,
				-	-	-	-	-	-	-	-	State University of New York Upstate Medical University,Karol H. Kerr,Syracuse,New York,13210,United States,315-464-5476,
				-	-	-	-	-	-	-	-	New York Medical College,Jessica C. Hochberg,Valhalla,New York,10595,United States,914-594-3794,
				-	-	-	-	-	-	-	-	Mission Hospital-Memorial Campus,Douglas J. Scothorn,Asheville,North Carolina,28801,United States,828-213-4150,
				-	-	-	-	-	-	-	-	University of North Carolina at Chapel Hill,Stuart H. Gold,Chapel Hill,North Carolina,27599,United States,cancerclinicaltrials@med.unc.edu,877-668-0683,
				-	-	-	-	-	-	-	-	East Carolina University,George E. Hucks,Greenville,North Carolina,27858,United States,252-744-2391,
				-	-	-	-	-	-	-	-	Wake Forest University Health Sciences,Thomas W. McLean,Winston-Salem,North Carolina,27157,United States,336-713-6771,
				-	-	-	-	-	-	-	-	Sanford Medical Center-Fargo,Samuel O. Anim,Fargo,North Dakota,58122,United States,701-234-6161,
				-	-	-	-	-	-	-	-	Children's Hospital Medical Center of Akron,Steven J. Kuerbitz,Akron,Ohio,44308,United States,330-543-3193,
				-	-	-	-	-	-	-	-	Cincinnati Children's Hospital Medical Center,John P. Perentesis,Cincinnati,Ohio,45229,United States,513-636-2799,
				-	-	-	-	-	-	-	-	Rainbow Babies and Childrens Hospital,Yousif (Joe) H. Matloub,Cleveland,Ohio,44106,United States,216-844-5437,
				-	-	-	-	-	-	-	-	Cleveland Clinic Foundation,Johannes E. Wolff,Cleveland,Ohio,44195,United States,866-223-8100,
				-	-	-	-	-	-	-	-	Nationwide Children's Hospital,Mark A. Ranalli,Columbus,Ohio,43205,United States,614-722-2708,
				-	-	-	-	-	-	-	-	Dayton Children's Hospital,Ayman A. El-Sheikh,Dayton,Ohio,45404,United States,800-237-1225,
				-	-	-	-	-	-	-	-	The Toledo Hospital/Toledo Children's Hospital,Jamie L. Dargart,Toledo,Ohio,43606,United States,419-824-1842,
				-	-	-	-	-	-	-	-	University of Oklahoma Health Sciences Center,Rene Y. McNall-Knapp,Oklahoma City,Oklahoma,73104,United States,julie-traylor@ouhsc.edu,405-271-4272,
				-	-	-	-	-	-	-	-	Natalie Warren Bryant Cancer Center at Saint Francis,Gregory B. Kirkpatrick,Tulsa,Oklahoma,74136,United States,918-494-2200,
				-	-	-	-	-	-	-	-	Legacy Emanuel Children's Hospital,Janice F. Olson,Portland,Oregon,97227,United States,503-413-2560,
				-	-	-	-	-	-	-	-	Legacy Emanuel Hospital and Health Center,Janice F. Olson,Portland,Oregon,97227,United States,503-413-2560,
				-	-	-	-	-	-	-	-	Lehigh Valley Hospital - Muhlenberg,Philip M. Monteleone,Bethlehem,Pennsylvania,18017,United States,484-884-2201,
				-	-	-	-	-	-	-	-	Geisinger Medical Center,Jagadeesh Ramdas,Danville,Pennsylvania,17822,United States,570-271-5251,
				-	-	-	-	-	-	-	-	Penn State Hershey Children's Hospital,Lisa M. McGregor,Hershey,Pennsylvania,17033,United States,717-531-6012,
				-	-	-	-	-	-	-	-	Children's Hospital of Philadelphia,Susan R. Rheingold,Philadelphia,Pennsylvania,19104,United States,215-590-2810,
				-	-	-	-	-	-	-	-	Saint Christopher's Hospital for Children,Akash Nahar,Philadelphia,Pennsylvania,19134,United States,215-427-8991,
				-	-	-	-	-	-	-	-	Children's Hospital of Pittsburgh of UPMC,Arthur K. Ritchey,Pittsburgh,Pennsylvania,15224,United States,412-692-5573,
				-	-	-	-	-	-	-	-	Medical University of South Carolina,Jacqueline M. Kraveka,Charleston,South Carolina,29425,United States,843-792-9321,
				-	-	-	-	-	-	-	-	Palmetto Health Richland,Ronnie W. Neuberg,Columbia,South Carolina,29203,United States,803-434-3680,
				-	-	-	-	-	-	-	-	Greenville Cancer Treatment Center,Cary E. Stroud,Greenville,South Carolina,29605,United States,864-241-6251,
				-	-	-	-	-	-	-	-	Sanford USD Medical Center - Sioux Falls,Kayelyn J. Wagner,Sioux Falls,South Dakota,57117-5134,United States,605-328-1367,
				-	-	-	-	-	-	-	-	T C Thompson Children's Hospital,Manoo G. Bhakta,Chattanooga,Tennessee,37403,United States,423-778-7289,
				-	-	-	-	-	-	-	-	East Tennessee Childrens Hospital,Ray C. Pais,Knoxville,Tennessee,37916,United States,865-541-8266,
				-	-	-	-	-	-	-	-	St. Jude Children's Research Hospital,Wayne L. Furman,Memphis,Tennessee,38105,United States,info@stjude.org,866-278-5833,
				-	-	-	-	-	-	-	-	Vanderbilt University/Ingram Cancer Center,Howard M. Katzenstein,Nashville,Tennessee,37232,United States,800-811-8480,
				-	-	-	-	-	-	-	-	Dell Children's Medical Center of Central Texas,Amy C. Fowler,Austin,Texas,78723,United States,214-648-7097,
				-	-	-	-	-	-	-	-	Driscoll Children's Hospital,M. C. Johnson,Corpus Christi,Texas,78411,United States,361-694-5311,
				-	-	-	-	-	-	-	-	UT Southwestern/Simmons Cancer Center-Dallas,Tamra L. Slone,Dallas,Texas,75390,United States,214-648-7097,
				-	-	-	-	-	-	-	-	El Paso Children's Hospital,Lisa L. Hartman,El Paso,Texas,79905,United States,ctsucontact@westat.com,888-823-5923,
				-	-	-	-	-	-	-	-	Cook Children's Medical Center,Kenneth M. Heym,Fort Worth,Texas,76104,United States,682-885-2103,
				-	-	-	-	-	-	-	-	Baylor College of Medicine,Karen R. Rabin,Houston,Texas,77030,United States,burton@bcm.edu,713-798-1354,
				-	-	-	-	-	-	-	-	M D Anderson Cancer Center,Cesar A. Nunez,Houston,Texas,77030,United States,713-792-3245,
				-	-	-	-	-	-	-	-	Covenant Children's Hospital,Latha Prasannan,Lubbock,Texas,79410,United States,jaccresearch@covhs.org,806-725-8000,
				-	-	-	-	-	-	-	-	Vannie Cook Children's Clinic,Juan C. Bernini,McAllen,Texas,78503,United States,burton@bcm.edu,713-798-1354,
				-	-	-	-	-	-	-	-	Children's Hospital of San Antonio,Timothy C. Griffin,San Antonio,Texas,78207,United States,burton@bcm.edu,713-798-1354,
				-	-	-	-	-	-	-	-	Methodist Children's Hospital of South Texas,Jaime Estrada,San Antonio,Texas,78229,United States,210-575-7000,
				-	-	-	-	-	-	-	-	University of Texas Health Science Center at San Antonio,Anne-Marie R. Langevin,San Antonio,Texas,78229,United States,CTO@uthscsa.edu,210-450-3800,
				-	-	-	-	-	-	-	-	Scott and White Memorial Hospital,Guy H. Grayson,Temple,Texas,76508,United States,254-724-5407,
				-	-	-	-	-	-	-	-	Primary Children's Hospital,Phillip E. Barnette,Salt Lake City,Utah,84113,United States,801-585-5270,
				-	-	-	-	-	-	-	-	University of Vermont College of Medicine,Alan C. Homans,Burlington,Vermont,05405,United States,802-656-4101,
				-	-	-	-	-	-	-	-	University of Virginia Cancer Center,Kimberly P. Dunsmore,Charlottesville,Virginia,22908,United States,434-243-6143,
				-	-	-	-	-	-	-	-	Inova Fairfax Hospital,Marshall A. Schorin,Falls Church,Virginia,22042,United States,703-208-6650,
				-	-	-	-	-	-	-	-	Childrens Hospital-King's Daughters,Eric J. Lowe,Norfolk,Virginia,23507,United States,757-668-7243,
				-	-	-	-	-	-	-	-	Naval Medical Center - Portsmouth,Bethany M. Mikles,Portsmouth,Virginia,23708-2197,United States,757-953-5939,
				-	-	-	-	-	-	-	-	Virginia Commonwealth University/Massey Cancer Center,Gita V. Massey,Richmond,Virginia,23298,United States,804-628-1939,
				-	-	-	-	-	-	-	-	Carilion Clinic Children's Hospital,Mandy M. Atkinson,Roanoke,Virginia,24014,United States,540-981-7376,
				-	-	-	-	-	-	-	-	Seattle Children's Hospital,Douglas S. Hawkins,Seattle,Washington,98105,United States,866-987-2000,
				-	-	-	-	-	-	-	-	Providence Sacred Heart Medical Center and Children's Hospital,Judy L. Felgenhauer,Spokane,Washington,99204,United States,HopeBeginsHere@providence.org,800-228-6618,
				-	-	-	-	-	-	-	-	Mary Bridge Children's Hospital and Health Center,Robert G. Irwin,Tacoma,Washington,98405,United States,253-403-3229,
				-	-	-	-	-	-	-	-	Madigan Army Medical Center,Melissa A. Forouhar,Tacoma,Washington,98431,United States,mamcdci@amedd.army.mil,253-968-0129,
				-	-	-	-	-	-	-	-	West Virginia University Charleston,Howard M. Grodman,Charleston,West Virginia,25304,United States,304-388-9944,
				-	-	-	-	-	-	-	-	West Virginia University Healthcare,Stephan R. Paul,Morgantown,West Virginia,26506,United States,sfilburn@hsc.wvu.edu,304-293-2745,
				-	-	-	-	-	-	-	-	Saint Vincent Hospital,John R. Hill,Green Bay,Wisconsin,54301,United States,920-433-8889,
				-	-	-	-	-	-	-	-	University of Wisconsin Hospital and Clinics,Kenneth B. DeSantes,Madison,Wisconsin,53792,United States,608-262-5223,
				-	-	-	-	-	-	-	-	Marshfield Clinic,Michael J. McManus,Marshfield,Wisconsin,54449,United States,715-389-4457,
				-	-	-	-	-	-	-	-	Midwest Children's Cancer Center,Michael E. Kelly,Milwaukee,Wisconsin,53226,United States,414-805-4380,
ABL1	NCT01231412	Graft-Versus-Host Disease Prophylaxis in Treating Patients With Hematologic Malignancies Undergoing Unrelated Donor Peripheral Blood Stem Cell Transplant	Phase 3	Acute Lymphoblastic Leukemia	MYCOPHENOLATE MOFETIL	DB00619	ABL1	IMATINIB	GLEEVEC 100 MG TABLET USD 41.69;GLEEVEC 400 MG TABLET USD 174.38	-	-	University of Colorado,Jonathan A. Gutman,Denver,Colorado,80217-3364,United States,jonathan.gutman@uchsc.edu,303-266-0763,
				Acute Myeloid Leukemia	SIROLIMUS	DB01254	ABL1	DASATINIB	SPRYCEL 20 MG TABLET USD 69.56;SPRYCEL 50 MG TABLET USD 139.12;SPRYCEL 70 MG TABLET USD 139.12;SPRYCEL 100 MG TABLET USD 278.24	-	-	Presbyterian - Saint Lukes Medical Center - Health One,Michael B. Maris,Denver,Colorado,80218,United States,kgeisen@co-cancerresearch.org,720-754-4800,
				Aggressive Non-Hodgkin Lymphoma	FLUDARABINE PHOSPHATE	DB04868	ABL1	NILOTINIB	-	-	-	Emory University/Winship Cancer Institute,Amelia A. Langston,Atlanta,Georgia,30322,United States,Amelia_Langston@emoryhealthcare.org,404-778-4189,
				Chronic Lymphocytic Leukemia	CYCLOSPORINE	DB05184	ABL1	XL228	-	-	-	VA Puget Sound Health Care System,Thomas R. Chauncey,Seattle,Washington,98101,United States,thomas.chauncey@va.gov,206-762-1010,
				Diffuse Large B-Cell Lymphoma	-	DB06616	ABL1	BOSUTINIB	-	-	-	Fred Hutch/University of Washington Cancer Consortium,Brenda M. Sandmaier,Seattle,Washington,98109,United States,bsandmai@fredhutch.org,206-667-4961,
				Hematopoietic and Lymphoid Cell Neoplasm	-	DB08896	ABL1	REGORAFENIB	-	-	-	-
				Indolent Non-Hodgkin Lymphoma	-	DB08901	ABL1	PONATINIB	-	-	-	-
				Mantle Cell Lymphoma	-	-	-	-	-	-	-	-
				Myelodysplastic Syndrome	-	-	-	-	-	-	-	-
				Myeloproliferative Neoplasm	-	-	-	-	-	-	-	-
				Prolymphocytic Leukemia	-	-	-	-	-	-	-	-
				Recurrent Chronic Lymphocytic Leukemia	-	-	-	-	-	-	-	-
				Recurrent Plasma Cell Myeloma	-	-	-	-	-	-	-	-
				Refractory Chronic Lymphocytic Leukemia	-	-	-	-	-	-	-	-
				Refractory Chronic Myelogenous Leukemia, BCR-ABL1 Positive	-	-	-	-	-	-	-	-
				Refractory Hodgkin Lymphoma	-	-	-	-	-	-	-	-
				Small Lymphocytic Lymphoma	-	-	-	-	-	-	-	-
				T-Cell Chronic Lymphocytic Leukemia	-	-	-	-	-	-	-	-
				Waldenstrom Macroglobulinemia	-	-	-	-	-	-	-	-
ABL1	NCT01251575	Sirolimus, Cyclosporine, and Mycophenolate Mofetil in Preventing Graft-versus-Host Disease in Treating Patients With Hematologic Malignancies Undergoing Donor Peripheral Blood Stem Cell Transplant	Phase 2	Adult Acute Lymphoblastic Leukemia	MYCOPHENOLATE MOFETIL	DB00619	ABL1	IMATINIB	GLEEVEC 100 MG TABLET USD 41.69;GLEEVEC 400 MG TABLET USD 174.38	-	-	Presbyterian - Saint Lukes Medical Center - Health One,Michael B. Maris,Denver,Colorado,80218,United States,Michael.Maris@healthonecares.com,720-754-4800,
				Adult Acute Myeloid Leukemia	SIROLIMUS	DB01254	ABL1	DASATINIB	SPRYCEL 20 MG TABLET USD 69.56;SPRYCEL 50 MG TABLET USD 139.12;SPRYCEL 70 MG TABLET USD 139.12;SPRYCEL 100 MG TABLET USD 278.24	-	-	VA Puget Sound Health Care System,Thomas R. Chauncey,Seattle,Washington,98101,United States,thomas.chauncey@va.gov,206-762-1010,
				Adult Diffuse Large B-Cell Lymphoma	FLUDARABINE PHOSPHATE	DB04868	ABL1	NILOTINIB	-	-	-	Fred Hutch/University of Washington Cancer Consortium,Brenda M. Sandmaier,Seattle,Washington,98109,United States,bsandmai@fredhutch.org,206-667-4961,
				Adult Myelodysplastic Syndrome	CYCLOSPORINE	DB05184	ABL1	XL228	-	-	-	-
				Adult Non-Hodgkin Lymphoma	-	DB06616	ABL1	BOSUTINIB	-	-	-	-
				Aggressive Non-Hodgkin Lymphoma	-	DB08896	ABL1	REGORAFENIB	-	-	-	-
				Childhood Acute Lymphoblastic Leukemia	-	DB08901	ABL1	PONATINIB	-	-	-	-
				Childhood Acute Myeloid Leukemia	-	-	-	-	-	-	-	-
				Childhood Diffuse Large B -Cell Lymphoma	-	-	-	-	-	-	-	-
				Childhood Myelodysplastic Syndrome	-	-	-	-	-	-	-	-
				Childhood Non-Hodgkin Lymphoma	-	-	-	-	-	-	-	-
				Chronic Lymphocytic Leukemia	-	-	-	-	-	-	-	-
				Chronic Lymphocytic Leukemia in Remission	-	-	-	-	-	-	-	-
				Chronic Phase Chronic Myelogenous Leukemia, BCR-ABL1 Positive	-	-	-	-	-	-	-	-
				Hematopoietic and Lymphoid Cell Neoplasm	-	-	-	-	-	-	-	-
				Mantle Cell Lymphoma	-	-	-	-	-	-	-	-
				Plasma Cell Myeloma	-	-	-	-	-	-	-	-
				Prolymphocytic Leukemia	-	-	-	-	-	-	-	-
				Recurrent Chronic Lymphocytic Leukemia	-	-	-	-	-	-	-	-
				Recurrent Diffuse Large B-Cell Lymphoma	-	-	-	-	-	-	-	-
				Recurrent Hodgkin Lymphoma	-	-	-	-	-	-	-	-
				Refractory Chronic Lymphocytic Leukemia	-	-	-	-	-	-	-	-
				T-Cell Chronic Lymphocytic Leukemia	-	-	-	-	-	-	-	-
				T-Cell Prolymphocytic Leukemia	-	-	-	-	-	-	-	-
				Waldenstrom Macroglobulinemia	-	-	-	-	-	-	-	-
ABL1	NCT01690520	Donor Umbilical Cord Blood Transplant With or Without Ex-vivo Expanded Cord Blood Progenitor Cells in Treating Patients With Acute Myeloid Leukemia, Acute Lymphoblastic Leukemia, Chronic Myelogenous Leukemia, or Myelodysplastic Syndromes	Phase 2	Acute Biphenotypic Leukemia	MYCOPHENOLATE MOFETIL	DB00619	ABL1	IMATINIB	GLEEVEC 100 MG TABLET USD 41.69;GLEEVEC 400 MG TABLET USD 174.38	-	-	City of Hope Comprehensive Cancer Center,Chatchada Karanes,Duarte,California,91010,United States,becomingapatient@coh.org,626-359-8111,
				Acute Lymphoblastic Leukemia in Remission	CYCLOPHOSPHAMIDE	DB01254	ABL1	DASATINIB	SPRYCEL 20 MG TABLET USD 69.56;SPRYCEL 50 MG TABLET USD 139.12;SPRYCEL 70 MG TABLET USD 139.12;SPRYCEL 100 MG TABLET USD 278.24	-	-	Lucile Packard Children's Hospital Stanford University,Rajni Agarwal-Hashmi,Palo Alto,California,94304,United States,rajnia@stanford.edu,650-725-9250,
				Acute Myeloid Leukemia Arising From Previous Myelodysplastic Syndrome	FLUDARABINE PHOSPHATE	DB04868	ABL1	NILOTINIB	-	-	-	Dana-Farber Harvard Cancer Center,Christine N. Duncan,Boston,Massachusetts,02115,United States,christine_duncan@dfci.harvard.edu,617-632-6255,
				Acute Myeloid Leukemia in Remission	CYCLOSPORINE	DB05184	ABL1	XL228	-	-	-	Duke University Medical Center,Joanne Kurtzberg,Durham,North Carolina,27710,United States,kurtz001@mc.duke.edu,919-668-1100,
				Chronic Myelogenous Leukemia, BCR-ABL1 Positive	-	DB06616	ABL1	BOSUTINIB	-	-	-	Cleveland Clinic Foundation,Rabi Hanna,Cleveland,Ohio,44195,United States,hannar2@ccf.org,216-444-0663,
				Mixed Phenotype Acute Leukemia	-	DB08896	ABL1	REGORAFENIB	-	-	-	Fred Hutch/University of Washington Cancer Consortium,Filippo Milano,Seattle,Washington,98109,United States,fmilano@fredhutch.org,206-667-5925,
				Myelodysplastic Syndrome	-	DB08901	ABL1	PONATINIB	-	-	-	-
				Pancytopenia	-	-	-	-	-	-	-	-
				Refractory Anemia	-	-	-	-	-	-	-	-
				Refractory Anemia With Excess Blasts	-	-	-	-	-	-	-	-
				Refractory Anemia With Excess Blasts in Transformation	-	-	-	-	-	-	-	-
				Secondary Acute Myeloid Leukemia	-	-	-	-	-	-	-	-
ABL1	NCT01858740	Selective Depletion of CD45RA+ T Cells From Allogeneic Peripheral Blood Stem Cell Grafts for the Prevention of GVHD in Children	Phase 2	Accelerated Phase Chronic Myelogenous Leukemia, BCR-ABL1 Positive	TACROLIMUS	DB00619	ABL1	IMATINIB	GLEEVEC 100 MG TABLET USD 41.69;GLEEVEC 400 MG TABLET USD 174.38	-	-	Fred Hutchinson Cancer Research Center/University of Washington Cancer Consortium,Marie Bleakley,Seattle,Washington,98109,United States,mbleakle@fredhutch.org,206-667-6572,
				Acute Biphenotypic Leukemia	METHOTREXATE	DB01254	ABL1	DASATINIB	SPRYCEL 20 MG TABLET USD 69.56;SPRYCEL 50 MG TABLET USD 139.12;SPRYCEL 70 MG TABLET USD 139.12;SPRYCEL 100 MG TABLET USD 278.24	-	-	-
				Acute Leukemia of Ambiguous Lineage	FLUDARABINE PHOSPHATE	DB04868	ABL1	NILOTINIB	-	-	-	-
				Acute Undifferentiated Leukemia	THIOTEPA	DB05184	ABL1	XL228	-	-	-	-
				Blast Phase Chronic Myelogenous Leukemia, BCR-ABL1 Positive	-	DB06616	ABL1	BOSUTINIB	-	-	-	-
				Childhood Acute Lymphoblastic Leukemia in Remission	-	DB08896	ABL1	REGORAFENIB	-	-	-	-
				Childhood Acute Myeloid Leukemia in Remission	-	DB08901	ABL1	PONATINIB	-	-	-	-
				Childhood Chronic Myelogenous Leukemia, BCR-ABL1 Positive	-	-	-	-	-	-	-	-
				Recurrent Childhood Acute Lymphoblastic Leukemia	-	-	-	-	-	-	-	-
				Recurrent Childhood Acute Myeloid Leukemia	-	-	-	-	-	-	-	-
				Refractory Anemia With Excess Blasts	-	-	-	-	-	-	-	-
ABL1	NCT01871311	A Phase I Study of Nilontinib and Cetuximab in Patients With Solid Tumors	Phase 1	Colorectal Cancer	NILOTINIB + CETUXIMAB	DB00619	ABL1	IMATINIB	GLEEVEC 100 MG TABLET USD 41.69;GLEEVEC 400 MG TABLET USD 174.38	-	-	Georgetown Lombardi Comprehensive Cancer Center,Brandon Smaglo, MD,Washington,District of Columbia,20007,United States,brandon.g.smaglo@gunet.georgetown.edu,202-444-1781,
				Head and Neck Cancer	-	DB01254	ABL1	DASATINIB	SPRYCEL 20 MG TABLET USD 69.56;SPRYCEL 50 MG TABLET USD 139.12;SPRYCEL 70 MG TABLET USD 139.12;SPRYCEL 100 MG TABLET USD 278.24	-	-	-
				-	-	DB04868	ABL1	NILOTINIB	-	-	-	-
				-	-	DB05184	ABL1	XL228	-	-	-	-
				-	-	DB06616	ABL1	BOSUTINIB	-	-	-	-
				-	-	DB08896	ABL1	REGORAFENIB	-	-	-	-
				-	-	DB08901	ABL1	PONATINIB	-	-	-	-
ABL1	NCT02092324	Ruxolitinib Phosphate in Treating Patients With Chronic Neutrophilic Leukemia or Atypical Chronic Myeloid Leukemia	Phase 2	Atypical Chronic Myeloid Leukemia, BCR-ABL1 Negative	RUXOLITINIB PHOSPHATE	DB00619	ABL1	IMATINIB	GLEEVEC 100 MG TABLET USD 41.69;GLEEVEC 400 MG TABLET USD 174.38	-	-	Stanford Cancer Institute,Jason R. Gotlib,Palo Alto,California,94304,United States,gotlib@stanford.org,650-736-1253,
				Chronic Neutrophilic Leukemia	-	DB01254	ABL1	DASATINIB	SPRYCEL 20 MG TABLET USD 69.56;SPRYCEL 50 MG TABLET USD 139.12;SPRYCEL 70 MG TABLET USD 139.12;SPRYCEL 100 MG TABLET USD 278.24	-	-	Emory University/Winship Cancer Institute,Elliott F. Winton,Atlanta,Georgia,30322,United States,ewinton@emory.edu,404-778-4755,
				-	-	DB04868	ABL1	NILOTINIB	-	-	-	Washington University School of Medicine,Stephen Oh,Saint Louis,Missouri,63110,United States,stoh@dom.wustl.edu,314-362-8846,
				-	-	DB05184	ABL1	XL228	-	-	-	OHSU Knight Cancer Institute,Kim-Hien Dao,Portland,Oregon,97239,United States,daok@ohsu.edu,503-494-7894,
				-	-	DB06616	ABL1	BOSUTINIB	-	-	-	UT Southwestern/Simmons Cancer Center-Dallas,Robert H. Collins,Dallas,Texas,75390,United States,robert.collins@utsouthwestern.edu,214-648-4155,
				-	-	DB08896	ABL1	REGORAFENIB	-	-	-	M D Anderson Cancer Center,Jorge E. Cortes,Houston,Texas,77030,United States,jcortes@mdanderson.org,713-794-5783,
				-	-	DB08901	ABL1	PONATINIB	-	-	-	Huntsman Cancer Institute/University of Utah,Michael W. Deininger,Salt Lake City,Utah,84112,United States,michael.deininger@hci.utah.edu,801-213-5684,
ABL1	NCT02220985	Selective Depletion of CD45RA+ Naive T Cells From Allogeneic Peripheral Blood Stem Cell Grafts From HLA-Matched Related and Unrelated Donors for Prevention of GVHD	Phase 2	Accelerated Phase Chronic Myelogenous Leukemia, BCR-ABL1 Positive	FLUDARABINE PHOSPHATE	DB00619	ABL1	IMATINIB	GLEEVEC 100 MG TABLET USD 41.69;GLEEVEC 400 MG TABLET USD 174.38	-	-	Fred Hutch/University of Washington Cancer Consortium,Marie Bleakley,Seattle,Washington,98109,United States,mbleakle@fredhutch.org,206-667-6572,
				Acute Biphenotypic Leukemia	CYCLOPHOSPHAMIDE	DB01254	ABL1	DASATINIB	SPRYCEL 20 MG TABLET USD 69.56;SPRYCEL 50 MG TABLET USD 139.12;SPRYCEL 70 MG TABLET USD 139.12;SPRYCEL 100 MG TABLET USD 278.24	-	-	-
				Acute Leukemia of Ambiguous Lineage	METHOTREXATE	DB04868	ABL1	NILOTINIB	-	-	-	-
				Acute Undifferentiated Leukemia	TACROLIMUS	DB05184	ABL1	XL228	-	-	-	-
				Adult Acute Lymphoblastic Leukemia in Remission	THIOTEPA	DB06616	ABL1	BOSUTINIB	-	-	-	-
				Adult Acute Myeloid Leukemia in Remission	MYCOPHENOLATE MOFETIL	DB08896	ABL1	REGORAFENIB	-	-	-	-
				Blast Phase Chronic Myelogenous Leukemia, BCR-ABL1 Positive	-	DB08901	ABL1	PONATINIB	-	-	-	-
				Childhood Acute Lymphoblastic Leukemia in Remission	-	-	-	-	-	-	-	-
				Childhood Acute Myeloid Leukemia in Remission	-	-	-	-	-	-	-	-
				Graft Versus Host Disease	-	-	-	-	-	-	-	-
				Recurrent Adult Acute Lymphoblastic Leukemia	-	-	-	-	-	-	-	-
				Recurrent Adult Acute Myeloid Leukemia	-	-	-	-	-	-	-	-
				Recurrent Childhood Acute Lymphoblastic Leukemia	-	-	-	-	-	-	-	-
				Recurrent Childhood Acute Myeloid Leukemia	-	-	-	-	-	-	-	-
				Recurrent Chronic Myelogenous Leukemia, BCR-ABL1 Positive	-	-	-	-	-	-	-	-
				Refractory Anemia With Excess Blasts	-	-	-	-	-	-	-	-
ABL1	NCT02272998	Ponatinib for Patients Whose Advanced Solid Tumor Cancer Has Activating Mutations Involving the Following Genes: FGFR1, FGFR2, FGFR3, FGFR4, RET, KIT.	Phase 2	Malignant Neoplasm	PONATINIB HYDROCHLORIDE	DB00619	ABL1	IMATINIB	GLEEVEC 100 MG TABLET USD 41.69;GLEEVEC 400 MG TABLET USD 174.38	-	-	University of Michigan,Ajjai Alva,Ann Arbor,Michigan,48109,United States,Ajjai@med.umich.edu,734-936-8906,
				-	-	DB01254	ABL1	DASATINIB	SPRYCEL 20 MG TABLET USD 69.56;SPRYCEL 50 MG TABLET USD 139.12;SPRYCEL 70 MG TABLET USD 139.12;SPRYCEL 100 MG TABLET USD 278.24	-	-	Arthur G. James Cancer Hospital and Solove Research Institute at Ohio State University Medical Center,Sameek Roychowdhury, MD,Columbus,Ohio,43210,United States,Sameek.Roychowdhury@osumc.edu,614-685-5842,
				-	-	DB04868	ABL1	NILOTINIB	-	-	-	-
				-	-	DB05184	ABL1	XL228	-	-	-	-
				-	-	DB06616	ABL1	BOSUTINIB	-	-	-	-
				-	-	DB08896	ABL1	REGORAFENIB	-	-	-	-
				-	-	DB08901	ABL1	PONATINIB	-	-	-	-
ABL1	NCT02381548	Phase I Trial of AZD1775 and Belinostat in Treating Patients With Relapsed or Refractory Myeloid Malignancies or Untreated Acute Myeloid Leukemia	Phase 1	Blast Phase Chronic Myelogenous Leukemia, BCR-ABL1 Positive	BELINOSTAT	DB00619	ABL1	IMATINIB	GLEEVEC 100 MG TABLET USD 41.69;GLEEVEC 400 MG TABLET USD 174.38	-	-	Moffitt Cancer Center,Jeffrey E. Lancet,Tampa,Florida,33612,United States,canceranswers@moffitt.org,813-745-3071,
				Previously Treated Myelodysplastic Syndrome	WEE1 INHIBITOR AZD1775	DB01254	ABL1	DASATINIB	SPRYCEL 20 MG TABLET USD 69.56;SPRYCEL 50 MG TABLET USD 139.12;SPRYCEL 70 MG TABLET USD 139.12;SPRYCEL 100 MG TABLET USD 278.24	-	-	Virginia Commonwealth University/Massey Cancer Center,Danielle A. Shafer,Richmond,Virginia,23298,United States,dshafer@mcvh-vcu.edu,804-828-8079,
				Recurrent Adult Acute Myeloid Leukemia	-	DB04868	ABL1	NILOTINIB	-	-	-	-
				Refractory Chronic Myelogenous Leukemia, BCR-ABL1 Positive	-	DB05184	ABL1	XL228	-	-	-	-
				Secondary Acute Myeloid Leukemia	-	DB06616	ABL1	BOSUTINIB	-	-	-	-
				Therapy-Related Acute Myeloid Leukemia	-	DB08896	ABL1	REGORAFENIB	-	-	-	-
				Untreated Adult Acute Myeloid Leukemia	-	DB08901	ABL1	PONATINIB	-	-	-	-
ABL1	NCT02728700	Sirolimus and Mycophenolate Mofetil in Preventing GVHD in Patients With Hematologic Malignancies Undergoing HSCT	Phase 1/Phase 2	Adult Hodgkin Lymphoma	MYCOPHENOLATE MOFETIL	DB00619	ABL1	IMATINIB	GLEEVEC 100 MG TABLET USD 41.69;GLEEVEC 400 MG TABLET USD 174.38	-	-	Stanford Cancer Institute,Rajni Agarwal-Hashmi,Palo Alto,California,94304,United States,leighs@stanford.edu,650-724-9179,
				Adult Myelodysplastic Syndrome	SIROLIMUS	DB01254	ABL1	DASATINIB	SPRYCEL 20 MG TABLET USD 69.56;SPRYCEL 50 MG TABLET USD 139.12;SPRYCEL 70 MG TABLET USD 139.12;SPRYCEL 100 MG TABLET USD 278.24	-	-	-
				Blast Phase Chronic Myelogenous Leukemia, BCR-ABL1 Positive	-	DB04868	ABL1	NILOTINIB	-	-	-	-
				Childhood Chronic Myelogenous Leukemia, BCR-ABL1 Positive	-	DB05184	ABL1	XL228	-	-	-	-
				Childhood Hodgkin Lymphoma	-	DB06616	ABL1	BOSUTINIB	-	-	-	-
				Childhood Myelodysplastic Syndrome	-	DB08896	ABL1	REGORAFENIB	-	-	-	-
				Chronic Phase Chronic Myelogenous Leukemia, BCR-ABL1 Positive	-	DB08901	ABL1	PONATINIB	-	-	-	-
				Myelofibrosis	-	-	-	-	-	-	-	-
				Primary Myelofibrosis	-	-	-	-	-	-	-	-
				Recurrent Adult Acute Lymphoblastic Leukemia	-	-	-	-	-	-	-	-
				Recurrent Adult Acute Myeloid Leukemia	-	-	-	-	-	-	-	-
				Recurrent Adult Non-Hodgkin Lymphoma	-	-	-	-	-	-	-	-
				Recurrent Childhood Acute Lymphoblastic Leukemia	-	-	-	-	-	-	-	-
				Recurrent Childhood Acute Myeloid Leukemia	-	-	-	-	-	-	-	-
				Recurrent Childhood Non-Hodgkin Lymphoma	-	-	-	-	-	-	-	-
				Recurrent Chronic Myelogenous Leukemia, BCR-ABL1 Positive	-	-	-	-	-	-	-	-
				Refractory Chronic Myelogenous Leukemia, BCR-ABL1 Positive	-	-	-	-	-	-	-	-
				Refractory Non-Hodgkin Lymphoma	-	-	-	-	-	-	-	-
ABL1	NCT02730195	Pioglitazone and Tyrosine Kinase Inhibitor in Treating Patients With Relapsed Chronic Myeloid Leukemia	Phase 2	Chronic Myelogenous Leukemia, BCR-ABL1 Positive	TYROSINE KINASE INHIBITOR (TKI)	DB00619	ABL1	IMATINIB	GLEEVEC 100 MG TABLET USD 41.69;GLEEVEC 400 MG TABLET USD 174.38	-	-	Emory University/Winship Cancer Institute,Shannon Gleason,Atlanta,Georgia,30322,United States,shannon.gleason@emory.edu,404-778-4334,
				Recurrent Chronic Myelogenous Leukemia, BCR-ABL1 Positive	PIOGLITAZONE HYDROCHLORIDE	DB01254	ABL1	DASATINIB	SPRYCEL 20 MG TABLET USD 69.56;SPRYCEL 50 MG TABLET USD 139.12;SPRYCEL 70 MG TABLET USD 139.12;SPRYCEL 100 MG TABLET USD 278.24	-	-	-
				-	-	DB04868	ABL1	NILOTINIB	-	-	-	-
				-	-	DB05184	ABL1	XL228	-	-	-	-
				-	-	DB06616	ABL1	BOSUTINIB	-	-	-	-
				-	-	DB08896	ABL1	REGORAFENIB	-	-	-	-
				-	-	DB08901	ABL1	PONATINIB	-	-	-	-
AKT1	NCT01226316	Safety, Tolerability & Potential Anti-cancer Activity of Increasing Doses of AZD5363 in Different Treatment Schedules	Phase 1	AKT1	AZD5363	DB01169	AKT1	ARSENIC TRIOXIDE	ARSENIC TRIOXIDE POWDER USD 2.59;TRISENOX 10 MG/10 ML AMPULE USD 43.58	-	-	Research Site,Los Angeles,California,United States,
				Advanced Solid Malignancy	-	-	-	-	-	-	-	Research Site,Stanford,California,United States,
				Advanced or Metastatic Breast Cancer	-	-	-	-	-	-	-	Research Site,Aurora,Colorado,United States,
				Cervical Cancer	-	-	-	-	-	-	-	Research Site,New Haven,Connecticut,United States,
				ER+	-	-	-	-	-	-	-	Research Site,New York,New York,United States,
				Endometrial Cancer	-	-	-	-	-	-	-	Research Site,Oklahoma City,Oklahoma,United States,
				HER2+	-	-	-	-	-	-	-	Research Site,Charleston,South Carolina,United States,
				Ovarian Cancer	-	-	-	-	-	-	-	Research Site,Nashville,Tennessee,United States,
				PIK3CA	-	-	-	-	-	-	-	Research Site,Houston,Texas,United States,
				PTEN	-	-	-	-	-	-	-	-
				Pharmacodynamics	-	-	-	-	-	-	-	-
				Pharmacokinetics	-	-	-	-	-	-	-	-
				Safety and Tolerability	-	-	-	-	-	-	-	-
				Tumour Response	-	-	-	-	-	-	-	-
AKT1	NCT01915576	Phase I Dose Escalation Study With an Allosteric AKT 1/2 Inhibitor in Patients	Phase 1	Neoplasms	BAY1125976	DB01169	AKT1	ARSENIC TRIOXIDE	ARSENIC TRIOXIDE POWDER USD 2.59;TRISENOX 10 MG/10 ML AMPULE USD 43.58	-	-	Santa Monica,California,90404,United States,
				-	-	-	-	-	-	-	-	St. Louis,Missouri,63110,United States,
				-	-	-	-	-	-	-	-	Houston,Texas,77030,United States,
AKT1	NCT01964924	Trametinib and Akt Inhibitor GSK2141795 in Treating Patients With Metastatic Triple-Negative Breast Cancer	Phase 2	Estrogen Receptor Negative	TRAMETINIB	DB01169	AKT1	ARSENIC TRIOXIDE	ARSENIC TRIOXIDE POWDER USD 2.59;TRISENOX 10 MG/10 ML AMPULE USD 43.58	-	-	MedStar Georgetown University Hospital,Claudine Isaacs,Washington,District of Columbia,20007,United States,isaacsc@georgetown.edu,202-444-3677,
				HER2/Neu Negative	AKT INHIBITOR GSK2141795	-	-	-	-	-	-	Moffitt Cancer Center,Roohi Ismail-Khan,Tampa,Florida,33612,United States,Roohi.Ismail-Khan@moffitt.org,813-745-4933,
				Invasive Breast Carcinoma	-	-	-	-	-	-	-	Roswell Park Cancer Institute,Ellis G. Levine,Buffalo,New York,14263,United States,Ellis.levine@roswellpark.org,716-845-2300,
				Progesterone Receptor Negative	-	-	-	-	-	-	-	UNC Lineberger Comprehensive Cancer Center,E. Claire Dees,Chapel Hill,North Carolina,27599,United States,Claire_dees@med.unc.edu,919-966-4431,
				Recurrent Breast Carcinoma	-	-	-	-	-	-	-	Case Western Reserve University,Joseph Baar,Cleveland,Ohio,44106,United States,Joseph.Baar@uhhospitals.org,216-286-4414,
				Stage IV Breast Cancer	-	-	-	-	-	-	-	Cleveland Clinic Foundation,George T. Budd,Cleveland,Ohio,44195,United States,buddg@ccf.org,216-444-6480,
				Triple-Negative Breast Carcinoma	-	-	-	-	-	-	-	Ohio State University Comprehensive Cancer Center,Bhuvaneswari Ramaswamy,Columbus,Ohio,43210,United States,Jamesline@osumc.edu,614-293-4372,
				-	-	-	-	-	-	-	-	Virginia Commonwealth University/Massey Cancer Center,Andrew Poklepovic,Richmond,Virginia,23298,United States,apoklepovic@mcvh-vcu.edu,804-628-2321,
AKT1	NCT02278965	Metformin and Omega-3 Fatty Acids in Woman With a History of Early Stage Breast Cancer	N/A	Breast Neoplasms	OMEGA-3 FATTY ACIDS	DB01169	AKT1	ARSENIC TRIOXIDE	ARSENIC TRIOXIDE POWDER USD 2.59;TRISENOX 10 MG/10 ML AMPULE USD 43.58	-	-	Columbia University,Katherine Crew, MD,New York,New York,10032,United States,DO2267@cumc.columbia.edu,212.342.3970,
				Stage 0 Breast Carcinoma	METFORMIN	-	-	-	-	-	-	-
				Stage I Breast Carcinoma	-	-	-	-	-	-	-	-
				Stage II Breast Carcinoma	-	-	-	-	-	-	-	-
				Stage III Breast Carcinoma	-	-	-	-	-	-	-	-
AKT1	NCT02476955	Open-label Phase 1b Study of ARQ 092 in Combination With Carboplatin Plus Paclitaxel	Phase 1	Breast Cancer Triple Negative	ARQ 092 + CARBOPLATIN + PACLITAXEL	DB01169	AKT1	ARSENIC TRIOXIDE	ARSENIC TRIOXIDE POWDER USD 2.59;TRISENOX 10 MG/10 ML AMPULE USD 43.58	-	-	Grand Rapids,Michigan,49503,United States,
				Cervical Cancer	-	-	-	-	-	-	-	San Antonio,Texas,78229,United States,
				Endometrial Cancer	-	-	-	-	-	-	-	-
				Ovarian Cancer	-	-	-	-	-	-	-	-
AKT1	NCT02594215	Dose Finding Trial of ARQ 092 in Children and Adults With Proteus Syndrome	Phase 1	Proteus Syndrome	ARQ 092	DB01169	AKT1	ARSENIC TRIOXIDE	ARSENIC TRIOXIDE POWDER USD 2.59;TRISENOX 10 MG/10 ML AMPULE USD 43.58	-	-	National Institutes of Health Clinical Center, 9000 Rockville Pike,For more information at the NIH Clinical Center contact Patient Recruitment and Public Liaison Office (PRPL),Bethesda,Maryland,20892,United States,prpl@mail.cc.nih.gov,800-411-1222,
ALK	NCT00585195	A Study Of Oral PF-02341066, A c-Met/Hepatocyte Growth Factor Tyrosine Kinase Inhibitor, In Patients With Advanced Cancer	Phase 1	Advanced Malignancies (Except Leukemia)	PF-02341066	DB08865	ALK	CRIZOTINIB	-	-	-	University of California, Irvine Medical Center Pharmacy,Orange,California,92868,United States,
				Non-Small Cell Lung Cancer (ALK-positive)	RIFAMPIN	DB09063	ALK	CERITINIB	-	-	-	University of California, Irvine Medical Center,Orange,California,92868,United States,
				Non-Small Cell Lung Cancer (ROS Marker Positive)	ITRACONAZOLE	DB11363	ALK	ALECTINIB	-	-	-	University of Colorado Hospital/ Drug Shipment: Anschutz Cancer Pavilion,Aurora,Colorado,80045,United States,
				Non-Small Cell Lung Cancer (c-Met Dependent)	-	-	-	-	-	-	-	University of Colorado Hospital,Aurora,Colorado,80045,United States,
				Systemic Anaplastic Large-Cell Lymphoma	-	-	-	-	-	-	-	Massachusetts General Hospital,Boston,Massachusetts,02114,United States,
				-	-	-	-	-	-	-	-	Ophthalmic Consultants of Boston Inc.,Boston,Massachusetts,02114,United States,
				-	-	-	-	-	-	-	-	Beth Israel Deaconess Medical Center,Boston,Massachusetts,02215,United States,
				-	-	-	-	-	-	-	-	Dana Farber Cancer Center,Boston,Massachusetts,02215,United States,
				-	-	-	-	-	-	-	-	Joslin Beetham Eye Institute,Boston,Massachusetts,02215,United States,
				-	-	-	-	-	-	-	-	Karmanos Cancer Institute,Detroit,Michigan,48201,United States,
				-	-	-	-	-	-	-	-	Kresge Eye Institute,Detroit,Michigan,48201,United States,
				-	-	-	-	-	-	-	-	Memorial Sloan-Kettering Cancer Center,New York,New York,10022,United States,
				-	-	-	-	-	-	-	-	Memorial Sloan-Kettering Cancer Center,New York,New York,10065,United States,
				-	-	-	-	-	-	-	-	UNC Cancer Hospital,Chapel Hill,North Carolina,27514,United States,
				-	-	-	-	-	-	-	-	UNC Hospitals,Chapel Hill,North Carolina,27599-7600,United States,
				-	-	-	-	-	-	-	-	The James Cancer Hospital and Solove Research Institute,Colombus,Ohio,43210,United States,
				-	-	-	-	-	-	-	-	Ohio State Eye and Ear Institute,Colombus,Ohio,43212,United States,
				-	-	-	-	-	-	-	-	The Ohio State University Medical Center Investigational Drug Services,Columbus,Ohio,43210,United States,
				-	-	-	-	-	-	-	-	The Ohio State University Martha Morehouse Medical Plaza,Columbus,Ohio,43221,United States,
				-	-	-	-	-	-	-	-	UPMC Hillman Cancer Center-Investigational Drug Service,Pittsburgh,Pennsylvania,15232,United States,
				-	-	-	-	-	-	-	-	UPMC Hillman Cancer Center,Pittsburgh,Pennsylvania,15232,United States,
				-	-	-	-	-	-	-	-	Henry-Joyce Cancer Clinic,Nashville,Tennessee,37232,United States,
				-	-	-	-	-	-	-	-	Vanderbilt Eye Institute,Nashville,Tennessee,37232,United States,
				-	-	-	-	-	-	-	-	Vanderbilt Oncology Pharmacy,Nashville,Tennessee,37232,United States,
				-	-	-	-	-	-	-	-	The University of Vermont Medical Center,Burlington,Vermont,05401,United States,
				-	-	-	-	-	-	-	-	The University of Vermont Cancer Center,Burlington,Vermont,05405,United States,
ALK	NCT01531361	Sorafenib or Crizotinib and Vemurafenib in Advanced Cancer	Phase 1	Advanced Cancers	VEMURAFENIB	DB08865	ALK	CRIZOTINIB	-	-	-	University of Texas MD Anderson Cancer Center,Houston,Texas,77030,United States,
				-	CRIZOTINIB	DB09063	ALK	CERITINIB	-	-	-	-
				-	SORAFENIB	DB11363	ALK	ALECTINIB	-	-	-	-
ALK	NCT01575717	The Effect of Vitamin D Repletion in Patients With Hepatocellular Carcinoma on the Orthotopic Liver Transplant List	N/A	Hepatocellular Carcinoma	VITAMIN D3 2000 IU	DB08865	ALK	CRIZOTINIB	-	-	-	The Mount Sinai Hospital,Andrea D Branch, PhD,New York,New York,10029,United States,
				Vitamin D Deficiency	VITAMIN D3 4000 IU	DB09063	ALK	CERITINIB	-	-	-	-
				-	-	DB11363	ALK	ALECTINIB	-	-	-	-
ALK	NCT01625234	Phase 1/2 Study of X-396, an Oral ALK Inhibitor, in Patients With ALK-positive Non-Small Cell Lung Cancer	Phase 1/Phase 2	Advanced Solid Tumors	X-396	DB08865	ALK	CRIZOTINIB	-	-	-	City of Hope National Med Ctr,Karen Reckamp, M.D.,Duarte,California,91010,United States,rmaya@coh.org,626-256-4673,
				Non-small Cell Lung Cancer	-	DB09063	ALK	CERITINIB	-	-	-	UCSD Moores Cancer Center,Sandip Patel, M.D.,La Jolla,California,92093,United States,shanan@ucsd.edu,858-822-6869,
				-	-	DB11363	ALK	ALECTINIB	-	-	-	Loma Linda University Cancer Center,Hamid Mirshahidi, MD,Loma Linda,California,92354,United States,909-558-4050,
				-	-	-	-	-	-	-	-	University of Southern California Norris Comprehensive Cancer Center,Barbara Gitlitz, MD,Los Angeles,California,90033,United States,tse_g@med.usc.edu,323-865-3962,
				-	-	-	-	-	-	-	-	Stanford University,Heather Wakelee, M.D.,Stanford,California,94305,United States,richardq@stanford.edu,650-723-2983,
				-	-	-	-	-	-	-	-	Walter Reed National Military Medical Center,Corey Carter, M.D.,Bethesda,Maryland,20889,United States,Virginia.f.schmidt3.ctr@mail.mil,301-295-6814,
				-	-	-	-	-	-	-	-	Dana Farber Cancer Institute,Leena Gandhi,Boston,Massachusetts,02215,United States,mailto:bryan_marion@dfci.harvard.edu,617-632-3383,
				-	-	-	-	-	-	-	-	Washington University School of Medicine,Saiama N Waqar, MD,St. Louis,Missouri,63110,United States,imcgowan@dom.wustl.edu,314-747-7569,
				-	-	-	-	-	-	-	-	Montefiore Medical Center,Haiying Cheng, MD,Bronx,New York,10461,United States,dpaucar@montefiore.org,718-405-8539,
				-	-	-	-	-	-	-	-	Stony Brook University Cancer Center,Roger Keresztes, MD,Stony Brook,New York,11794,United States,Kim.Lyktey@stonybrookmedicine.edu,631-638-1000,
				-	-	-	-	-	-	-	-	Ohio State University,Gregory Otterson, MD,Columbus,Ohio,43210,United States,Catherine.Schweitzer@osumc.edu,614-685-5414,
				-	-	-	-	-	-	-	-	Providence Portland Medical Center,Rachel Sanborn, MD,Portland,Oregon,97213,United States,nicole.edwards@providence.org,503-215-1833,
				-	-	-	-	-	-	-	-	Penn State Hershey Medical Center,Chandra Belani, MD,Hershey,Pennsylvania,17033,United States,rmiller13@hmc.psu.edu,717-531-1003,
				-	-	-	-	-	-	-	-	Fox Chase Cancer Center,Renee Mehra,Philadelphia,Pennsylvania,19111,United States,Lindsay.Hopkins@fccc.edu,215-214-3789,
				-	-	-	-	-	-	-	-	Medical University of South Carolina,Carol Sherman, MD,Charleston,South Carolina,29425,United States,dority@musc.edu,843-792-5853,
				-	-	-	-	-	-	-	-	Sarah Cannon Research Institute,Jeffrey Infante, MD,Nashville,Tennessee,37203,United States,ainslie.rogers@scresearch.net,615-524-4155,
				-	-	-	-	-	-	-	-	Vanderbilt University,Leora Horn, MD,Nashville,Tennessee,37240,United States,cip@vanderbilt.edu,800-811-8480,
				-	-	-	-	-	-	-	-	MD Anderson Cancer Center,George Blumenschein, MD,Houston,Texas,77030,United States,855-873-4321,
				-	-	-	-	-	-	-	-	University of Virginia Cancer Center,Richard Hall, MD,Charlottesville,Virginia,22903,United States,GBD4G@hscmail.mcc.virginia.edu,434-924-5990,
				-	-	-	-	-	-	-	-	West Virginia University Hospital,Patrick C Ma, MD, MSc,Morgantown,West Virginia,26506,United States,pbeal@hsc.wvu.edu,304-293-0609,
				-	-	-	-	-	-	-	-	University of Wisconsin Carbone Cancer Ctr,Ticiana Leal, M.D.,Madison,Wisconsin,53792,United States,hrhernan@uwcarbone.wisc.edu,608-262-8158,
ALK	NCT01742286	Phase I Study of LDK378 in Pediatric, Malignancies With a Genetic Alteration in Anaplastic Lymphoma Kinase (ALK)	Phase 1	Anaplastic Lymphoma Kinase (ALK)	LDK378	DB08865	ALK	CRIZOTINIB	-	-	-	Children's Healthcare of Atlanta Dept of Oncology,Thomas Cash,Atlanta,Georgia,30342,United States,Katherine.garrett@choa.org,404-785-3535,
				-	-	DB09063	ALK	CERITINIB	-	-	-	Dana Farber Cancer Institute Dept of Onc,Suzanne Shusterman,Boston,Massachusetts,02215,United States,Mei_yang@dfci.harvard.edu,617-582-7169,
				-	-	DB11363	ALK	ALECTINIB	-	-	-	Memorial Sloan Kettering Cancer Center SC - 7,Shakeel Modak,NY,New York,90033,United States,cabezonv@mskcc.org,646-888-5716,
				-	-	-	-	-	-	-	-	Cincinnati Children's Hospital Medical Center Dept of Oncology,Brian Weiss,Cincinnati,Ohio,45229-3039,United States,Denise.lagory@cchmc.org,513-636-9419,
				-	-	-	-	-	-	-	-	St. Jude's Children's Research Hospital Dept of Oncology,Alberto Pappo,Memphis,Tennessee,38105-2794,United States,robbin.christensen@stjude.org,+1 901 595 4616,
				-	-	-	-	-	-	-	-	Texas Children's Hospital Dept of Oncology,Eric Schafer,Houston,Texas,77030,United States,832-824-4570,
ALK	NCT01822496	Erlotinib Hydrochloride or Crizotinib and Chemoradiation Therapy in Treating Patients With Stage III Non-small Cell Lung Cancer	Phase 2	Stage IIIA Non-Small Cell Lung Cancer	CRIZOTINIB	DB08865	ALK	CRIZOTINIB	-	-	-	Providence Alaska Medical Center,Matthew C. Solhjem,Anchorage,Alaska,99508,United States,Julie.Cramer@providence.org,503-215-6387,
				Stage IIIB Non-Small Cell Lung Cancer	ERLOTINIB HYDROCHLORIDE	DB09063	ALK	CERITINIB	-	-	-	Mayo Clinic in Arizona,Yolanda I. Garces,Scottsdale,Arizona,85259,United States,507-538-7623,
				-	CARBOPLATIN	DB11363	ALK	ALECTINIB	-	-	-	Stanford Cancer Institute,Billy W. Loo,Palo Alto,California,94304,United States,ccto-office@stanford.edu,650-498-7061,
				-	PACLITAXEL	-	-	-	-	-	-	Saint Helena Hospital,David J. Tate,Saint Helena,California,94574,United States,David.Tate@ah.org,707-967-5722,
				-	ETOPOSIDE	-	-	-	-	-	-	UCSF Medical Center-Mount Zion,Sue S. Yom,San Francisco,California,94115,United States,yoms@radonc.ucsf.edu,415-353-9883,
				-	CISPLATIN	-	-	-	-	-	-	University of Colorado Cancer Center - Anschutz Cancer Pavilion,Brian D. Kavanagh,Aurora,Colorado,80045,United States,720-848-0650,
				-	-	-	-	-	-	-	-	Penrose-Saint Francis Healthcare,Keren Sturtz,Colorado Springs,Colorado,80907,United States,kgeisen@co-cancerresearch.org,303-777-2642,
				-	-	-	-	-	-	-	-	Memorial Hospital Colorado Springs,Jane W. Ridings,Colorado Springs,Colorado,80909,United States,719-365-2406,
				-	-	-	-	-	-	-	-	Poudre Valley Hospital,Brian D. Kavanagh,Fort Collins,Colorado,80524,United States,720-848-0650,
				-	-	-	-	-	-	-	-	McKee Medical Center,Keren Sturtz,Loveland,Colorado,80539,United States,kgeisen@co-cancerresearch.org,303-777-2642,
				-	-	-	-	-	-	-	-	Hartford Hospital,Neal B. Goldberg,Hartford,Connecticut,06102,United States,neal.goldberg@hhchealth.org,860-224-5986,
				-	-	-	-	-	-	-	-	The Hospital of Central Connecticut,Neal B. Goldberg,New Britain,Connecticut,06050,United States,neal.goldberg@hhchealth.org,860-224-5986,
				-	-	-	-	-	-	-	-	Christiana Care Health System-Christiana Hospital,Adam Raben,Newark,Delaware,19718,United States,302-733-6227,
				-	-	-	-	-	-	-	-	Memorial Regional Hospital/Joe DiMaggio Children's Hospital,Ignacio Castellon,Hollywood,Florida,33021,United States,igcastellon@yahoo.com,954-844-6808,
				-	-	-	-	-	-	-	-	Baptist MD Anderson Cancer Center,Mark E. Augspurger,Jacksonville,Florida,32207,United States,mark.augspurger@bmcjax.com,904-271-6695,
				-	-	-	-	-	-	-	-	Baptist Medical Center South,Mark E. Augspurger,Jacksonville,Florida,32258,United States,mark.augspurger@bmcjax.com,904-271-6695,
				-	-	-	-	-	-	-	-	University of Miami Miller School of Medicine-Sylvester Cancer Center,Adrian S. Ishkanian,Miami,Florida,33136,United States,Sylvester@emergingmed.com,866-574-5124,
				-	-	-	-	-	-	-	-	UF Cancer Center at Orlando Health,Justin Rineer,Orlando,Florida,32806,United States,CancerClinicalTrials@orlandohealth.com,321-841-7246,
				-	-	-	-	-	-	-	-	Emory University/Winship Cancer Institute,Kristin A. Higgins,Atlanta,Georgia,30322,United States,kristin.higgins@emory.edu,404-778-4139,
				-	-	-	-	-	-	-	-	Saint Joseph's Hospital of Atlanta,Kristin A. Higgins,Atlanta,Georgia,30342,United States,kristin.higgins@emory.edu,404-778-4139,
				-	-	-	-	-	-	-	-	Northeast Georgia Medical Center,Frank G. Lake,Gainesville,Georgia,30501,United States,cancerpatient.navigator@nghs.com,770-219-8800,
				-	-	-	-	-	-	-	-	Lewis Cancer and Research Pavilion at Saint Joseph's/Candler,John A. Pablo,Savannah,Georgia,31405,United States,800-622-6877,
				-	-	-	-	-	-	-	-	Saint Alphonsus Cancer Care Center-Boise,Samir Narayan,Boise,Idaho,83706,United States,734-712-4673,
				-	-	-	-	-	-	-	-	Northwestern University,Nisha A. Mohindra,Chicago,Illinois,60611,United States,cancer@northwestern.edu,312-695-6189,
				-	-	-	-	-	-	-	-	University of Chicago Comprehensive Cancer Center,Victoria M. Villaflor,Chicago,Illinois,60637,United States,vvillafl@medicine.bsd.uchicago.edu,773-702-3002,
				-	-	-	-	-	-	-	-	Decatur Memorial Hospital,James L. Wade,Decatur,Illinois,62526,United States,kcheek@dmhhs.org,217-876-4740,
				-	-	-	-	-	-	-	-	Loyola University Medical Center,Matthew M. Harkenrider,Maywood,Illinois,60153,United States,mharkenrider@lumc.edu,708-216-6076,
				-	-	-	-	-	-	-	-	Edward Hospital/Cancer Center,Maria I. Quejada,Naperville,Illinois,60540,United States,mquejada@edward.org,630-646-6071,
				-	-	-	-	-	-	-	-	Edward Hospital/Cancer Center?Plainfield,Maria I. Quejada,Plainfield,Illinois,60585,United States,mquejada@edward.org,630-646-6071,
				-	-	-	-	-	-	-	-	Memorial Medical Center,James L. Wade,Springfield,Illinois,62781,United States,kcheek@dmhhs.org,217-876-4740,
				-	-	-	-	-	-	-	-	Saint Vincent Anderson Regional Hospital/Cancer Center,Alexander M. Yeh,Anderson,Indiana,46016,United States,amyeh@stvincent.org,765-646-8413,
				-	-	-	-	-	-	-	-	Radiation Oncology Associates PC,Brian K. Chang,Fort Wayne,Indiana,46804,United States,parkviewresearch@parkview.com,260-373-8888,
				-	-	-	-	-	-	-	-	Parkview Hospital Randallia,Brian K. Chang,Fort Wayne,Indiana,46805,United States,parkviewresearch@parkview.com,260-373-8888,
				-	-	-	-	-	-	-	-	McFarland Clinic PC-William R Bliss Cancer Center,Joseph J. Merchant,Ames,Iowa,50010,United States,515-239-2621,
				-	-	-	-	-	-	-	-	Saint Luke's Hospital,Aruna Turaka,Cedar Rapids,Iowa,52402,United States,arunaturaka@opog.com,319-297-2900,
				-	-	-	-	-	-	-	-	Siouxland Regional Cancer Center,Donald B. Wender,Sioux City,Iowa,51101,United States,drednew@msn.com,712-252-9359,
				-	-	-	-	-	-	-	-	Maine Medical Center- Scarborough Campus,Ian J. Bristol,Scarborough,Maine,04074,United States,wrighd@mmc.org,207-396-8090,
				-	-	-	-	-	-	-	-	University of Maryland/Greenebaum Cancer Center,Steven J. Feigenberg,Baltimore,Maryland,21201,United States,800-888-8823,
				-	-	-	-	-	-	-	-	Sinai Hospital of Baltimore,Jeanette A. Linder,Baltimore,Maryland,21215,United States,pridgely@lifebridgehealth.org,410-601-6120,
				-	-	-	-	-	-	-	-	Tufts Medical Center,Kathryn E. Huber,Boston,Massachusetts,02111,United States,ContactUsCancerCenter@TuftsMedicalCenter.org,617-636-8886,
				-	-	-	-	-	-	-	-	Dana-Farber/Harvard Cancer Center,Geoffrey R. Oxnard,Boston,Massachusetts,02115,United States,goxnard@partners.org,877-442-3324,
				-	-	-	-	-	-	-	-	Beth Israel Deaconess Medical Center,Geoffrey R. Oxnard,Boston,Massachusetts,02215,United States,goxnard@partners.org,617-632-5786,
				-	-	-	-	-	-	-	-	Lahey Hospital and Medical Center,Jacob M. Sands,Burlington,Massachusetts,01805,United States,jacob.m.sands@lahey.org,781-744-5192,
				-	-	-	-	-	-	-	-	Lowell General Hospital,Blair Ardman,Lowell,Massachusetts,01854,United States,ghincks@lowellgeneral.org,978-788-7084,
				-	-	-	-	-	-	-	-	Saint Joseph Mercy Hospital,Samir Narayan,Ann Arbor,Michigan,48106-0995,United States,734-712-4673,
				-	-	-	-	-	-	-	-	Oakwood Hospital and Medical Center,Samir Narayan,Dearborn,Michigan,48124,United States,734-712-4673,
				-	-	-	-	-	-	-	-	Mercy Health Saint Mary's,Kathleen J. Yost,Grand Rapids,Michigan,49503,United States,connie.szczepanek@grcop.org,616-391-1230,
				-	-	-	-	-	-	-	-	Spectrum Health at Butterworth Campus,Kathleen J. Yost,Grand Rapids,Michigan,49503,United States,connie.szczepanek@grcop.org,616-954-2116,
				-	-	-	-	-	-	-	-	West Michigan Cancer Center,Kathleen J. Yost,Kalamazoo,Michigan,49007,United States,connie.szczepanek@grcop.org,616-954-2116,
				-	-	-	-	-	-	-	-	Saint Mary Mercy Hospital,Samir Narayan,Livonia,Michigan,48154,United States,734-712-4673,
				-	-	-	-	-	-	-	-	Saint Joseph Mercy Oakland,Samir Narayan,Pontiac,Michigan,48341,United States,734-712-4673,
				-	-	-	-	-	-	-	-	Saint Mary's of Michigan,Samir Narayan,Saginaw,Michigan,48601,United States,734-712-4673,
				-	-	-	-	-	-	-	-	Mercy Hospital,Paul W. Sperduto,Coon Rapids,Minnesota,55433,United States,MMCCOP@parknicollet.com,952-993-1517,
				-	-	-	-	-	-	-	-	Miller-Dwan Hospital,Bret E. Friday,Duluth,Minnesota,55805,United States,bret.friday@essentiahealth.org,888-203-7267,
				-	-	-	-	-	-	-	-	Hennepin County Medical Center,Paul W. Sperduto,Minneapolis,Minnesota,55415,United States,MMCCOP@parknicollet.com,952-993-1517,
				-	-	-	-	-	-	-	-	Mayo Clinic,Yolanda I. Garces,Rochester,Minnesota,55905,United States,507-538-7623,
				-	-	-	-	-	-	-	-	Regions Hospital,Paul W. Sperduto,Saint Paul,Minnesota,55101,United States,MMCCOP@parknicollet.com,952-993-1517,
				-	-	-	-	-	-	-	-	Rice Memorial Hospital,Paul W. Sperduto,Willmar,Minnesota,56201,United States,MMCCOP@parknicollet.com,952-993-1517,
				-	-	-	-	-	-	-	-	Phelps County Regional Medical Center,Jay W. Carlson,Rolla,Missouri,65401,United States,jay.carlson@mercy.net,417-820-3587,
				-	-	-	-	-	-	-	-	Washington University School of Medicine,Ramaswamy Govindan,Saint Louis,Missouri,63110,United States,info@siteman.wustl.edu,800-600-3606,
				-	-	-	-	-	-	-	-	Missouri Baptist Medical Center,James L. Wade,Saint Louis,Missouri,63131,United States,kcheek@dmhhs.org,217-876-4740,
				-	-	-	-	-	-	-	-	CoxHealth South Hospital,Jay W. Carlson,Springfield,Missouri,65807,United States,jay.carlson@mercy.net,417-820-3587,
				-	-	-	-	-	-	-	-	Nebraska Methodist Hospital,Tien-Shew W. Huang,Omaha,Nebraska,68114,United States,402-354-5144,
				-	-	-	-	-	-	-	-	Elliot Hospital,Brian R. Knab,Manchester,New Hampshire,03103,United States,brknab@gmail.com,603-663-1800,
				-	-	-	-	-	-	-	-	Virtua Memorial,Lemuel S. Ariaratnam,Mount Holly,New Jersey,08060,United States,609-914-6762,
				-	-	-	-	-	-	-	-	Rutgers Cancer Institute of New Jersey-Robert Wood Johnson University Hospital,Salma K. Jabbour,New Brunswick,New Jersey,08903,United States,jabbousk@cinj.rutgers.edu,732-235-8675,
				-	-	-	-	-	-	-	-	Rutgers Cancer Institute of New Jersey,Salma K. Jabbour,New Brunswick,New Jersey,08903,United States,jabbousk@cinj.rutgers.edu,732-235-8675,
				-	-	-	-	-	-	-	-	Community Medical Center,David J. D'Ambrosio,Toms River,New Jersey,08755,United States,732-818-3882,
				-	-	-	-	-	-	-	-	Mary Imogene Bassett Hospital,Joy E. Anderson,Cooperstown,New York,13326,United States,diana.crean@bassett.org,607-547-3073,
				-	-	-	-	-	-	-	-	Mount Sinai Medical Center,Jorge E. Gomez,New York,New York,10029,United States,jenny.figueroa@mssm.edu,212-824-7320,
				-	-	-	-	-	-	-	-	University of Rochester,Yuhchyau Chen,Rochester,New York,14642,United States,585-275-5830,
				-	-	-	-	-	-	-	-	Cancer Care of Western North Carolina,Christopher H. Chay,Asheville,North Carolina,28801,United States,chay@ccwnc.com,828-418-0932,
				-	-	-	-	-	-	-	-	Mission Hospital-Memorial Campus,Christopher H. Chay,Asheville,North Carolina,28801,United States,chay@ccwnc.com,828-418-0932,
				-	-	-	-	-	-	-	-	Wake Forest University Health Sciences,Brian E. Lally,Winston-Salem,North Carolina,27157,United States,blally@wakehealth.edu,336-713-6622,
				-	-	-	-	-	-	-	-	Summa Akron City Hospital/Cooper Cancer Center,Desiree E. Doncals,Akron,Ohio,44304,United States,330-375-6101,
				-	-	-	-	-	-	-	-	Akron General Medical Center,Mitchel L. Fromm,Akron,Ohio,44307,United States,330-344-6348,
				-	-	-	-	-	-	-	-	Summa Barberton Hospital,Desiree E. Doncals,Barberton,Ohio,44203,United States,330-375-6101,
				-	-	-	-	-	-	-	-	Adena Regional Medical Center,John P. Kuebler,Chillicothe,Ohio,45601,United States,sheree@columbusccop.org,614-488-2745,
				-	-	-	-	-	-	-	-	Cleveland Clinic Cancer Center/Fairview Hospital,Gregory M. M. Videtic,Cleveland,Ohio,44111,United States,866-223-8100,
				-	-	-	-	-	-	-	-	Cleveland Clinic Foundation,Gregory M. M. Videtic,Cleveland,Ohio,44195,United States,866-223-8100,
				-	-	-	-	-	-	-	-	Ohio State University Comprehensive Cancer Center,Meng X. Welliver,Columbus,Ohio,43210,United States,Jamesline@osumc.edu,800-293-5066,
				-	-	-	-	-	-	-	-	Grant Medical Center,John P. Kuebler,Columbus,Ohio,43215,United States,sheree@columbusccop.org,614-488-2745,
				-	-	-	-	-	-	-	-	The Mark H Zangmeister Center,John P. Kuebler,Columbus,Ohio,43219,United States,sheree@columbusccop.org,614-488-2745,
				-	-	-	-	-	-	-	-	North Coast Cancer Care,Gregory M. M. Videtic,Sandusky,Ohio,44870,United States,866-223-8100,
				-	-	-	-	-	-	-	-	Cleveland Clinic Cancer Center Strongsville,Gregory M. M. Videtic,Strongsville,Ohio,44136,United States,866-223-8100,
				-	-	-	-	-	-	-	-	Cleveland Clinic Wooster Family Health and Surgery Center,Gregory M. M. Videtic,Wooster,Ohio,44691,United States,866-223-8100,
				-	-	-	-	-	-	-	-	University of Oklahoma Health Sciences Center,Terence S. Herman,Oklahoma City,Oklahoma,73104,United States,ou-clinical-trials@ouhsc.edu,405-271-8777,
				-	-	-	-	-	-	-	-	Legacy Mount Hood Medical Center,Andrew Y. Kee,Gresham,Oregon,97030,United States,cancer@lhs.org,800-220-4937,
				-	-	-	-	-	-	-	-	Legacy Good Samaritan Hospital and Medical Center,Andrew Y. Kee,Portland,Oregon,97210,United States,cancer@lhs.org,800-220-4937,
				-	-	-	-	-	-	-	-	Providence Portland Medical Center,Matthew C. Solhjem,Portland,Oregon,97213,United States,Julie.Cramer@providence.org,503-215-6387,
				-	-	-	-	-	-	-	-	Salem Hospital,John Strother,Salem,Oregon,97301,United States,503-561-2618,
				-	-	-	-	-	-	-	-	Bryn Mawr Hospital,Albert S. DeNittis,Bryn Mawr,Pennsylvania,19010,United States,ewend@mlhs.org,484-476-2649,
				-	-	-	-	-	-	-	-	Geisinger Medical Center,Thomas J. Gergel,Danville,Pennsylvania,17822,United States,570-271-5251,
				-	-	-	-	-	-	-	-	Paoli Memorial Hospital,Albert S. DeNittis,Paoli,Pennsylvania,19301,United States,ewend@mlhs.org,484-476-2649,
				-	-	-	-	-	-	-	-	Fox Chase Cancer Center,Mark A. Hallman,Philadelphia,Pennsylvania,19111,United States,mark.hallman@fccc.edu,215-214-1629,
				-	-	-	-	-	-	-	-	Guthrie Medical Group PC-Robert Packer Hospital,Bradley W. Lash,Sayre,Pennsylvania,18840,United States,lash_bradley@guthrie.org,800-836-0388,
				-	-	-	-	-	-	-	-	Lankenau Medical Center,Albert S. DeNittis,Wynnewood,Pennsylvania,19096,United States,ewend@mlhs.org,484-476-2649,
				-	-	-	-	-	-	-	-	Medical University of South Carolina,Carol A. Sherman,Charleston,South Carolina,29425,United States,shermanc@musc.edu,843-792-0644,
				-	-	-	-	-	-	-	-	Greenville Health System Cancer Institute-Faris,David L. Grisell,Greenville,South Carolina,29605,United States,dgrisell@ghs.org,864-679-4001,
				-	-	-	-	-	-	-	-	Greenville Health System Cancer Institute-Eastside,David L. Grisell,Greenville,South Carolina,29615,United States,dgrisell@ghs.org,864-679-4001,
				-	-	-	-	-	-	-	-	Greenville Health System Cancer Institute-Greer,David L. Grisell,Greer,South Carolina,29650,United States,dgrisell@ghs.org,864-679-4001,
				-	-	-	-	-	-	-	-	Greenville Health System Cancer Institute-Seneca,David L. Grisell,Seneca,South Carolina,29672,United States,dgrisell@ghs.org,864-679-4001,
				-	-	-	-	-	-	-	-	Spartanburg Medical Center,Patricia C. Griffin,Spartanburg,South Carolina,29303,United States,pgriffin@gibbscc.org,828-560-1055,
				-	-	-	-	-	-	-	-	Greenville Health System Cancer Institute-Spartanburg,David L. Grisell,Spartanburg,South Carolina,29307,United States,dgrisell@ghs.org,864-679-4001,
				-	-	-	-	-	-	-	-	UT Southwestern/Simmons Cancer Center-Dallas,Hak Choy,Dallas,Texas,75390,United States,hak.choy@utsouthwestern.edu,214-645-8913,
				-	-	-	-	-	-	-	-	M D Anderson Cancer Center,Anne S. Tsao,Houston,Texas,77030,United States,713-792-3245,
				-	-	-	-	-	-	-	-	Covenant Medical Center-Lakeside,Paul J. Anderson,Lubbock,Texas,79410,United States,jaccresearch@covhs.org,806-725-8000,
				-	-	-	-	-	-	-	-	Intermountain Medical Center,George M. Cannon,Murray,Utah,84157,United States,george.cannon2@imail.org,801-507-3810,
				-	-	-	-	-	-	-	-	Dixie Medical Center Regional Cancer Center,George M. Cannon,Saint George,Utah,84770,United States,george.cannon2@imail.org,801-507-3810,
				-	-	-	-	-	-	-	-	Saint John Medical Center,Matthew C. Solhjem,Longview,Washington,98632,United States,Julie.Cramer@providence.org,503-215-6387,
				-	-	-	-	-	-	-	-	PeaceHealth Southwest Medical Center,Matthew C. Solhjem,Vancouver,Washington,98664,United States,Julie.Cramer@providence.org,503-215-6387,
				-	-	-	-	-	-	-	-	Edwards Comprehensive Cancer Center,Maria R. Tria Tirona,Huntington,West Virginia,25701,United States,304-399-6617,
				-	-	-	-	-	-	-	-	Waukesha Memorial Hospital,Wingate F. Clapper,Waukesha,Wisconsin,53188,United States,Chanda.miller@phci.org,262-928-7537,
ALK	NCT01829217	Sunitinib in Never-Smokers With Lung Adenocarcinoma	Phase 2	Lung Cancer	SUNITINIB	DB08865	ALK	CRIZOTINIB	-	-	-	Massachusetts General Hospital,Rebecca Heist, MD,Boston,Massachusetts,02214,United States,rheist@partners.org,617-726-1838,
				-	-	DB09063	ALK	CERITINIB	-	-	-	Beth Isreal Deaconess Medical Center,Daniel Costa, MD, PhD,Boston,Massachusetts,02215,United States,dcosta@bidmc.harvard.edu,617-667-9236,
				-	-	DB11363	ALK	ALECTINIB	-	-	-	Brigham and Women's Hospital,Geoffrey Oxnard, MD,Boston,Massachusetts,02215,United States,geoffrey_oxnard@dfci.harvard.edu,617-632-6234,
				-	-	-	-	-	-	-	-	Dana-Farber Cancer Institute,Geoffrey Oxnard, MD,Boston,Massachusetts,02215,United States,geoffrey_oxnard@dfci.harvard.edu,617-632-6234,
ALK	NCT01970865	A Study Of PF-06463922 An ALK/ROS1 Inhibitor In Patients With Advanced Non Small Cell Lung Cancer With Specific Molecular Alterations	Phase 1/Phase 2	ALK-positive Non Small Cell Lung Cancer (NSCLC) and ROS1-positive NSCLC	CRIZOTINIB	DB08865	ALK	CRIZOTINIB	-	-	-	Highlands Oncology Group/Research,Fayetteville,Arkansas,72703,United States,
				-	PF-06463922	DB09063	ALK	CERITINIB	-	-	-	Drug shipping address: Highlands Oncology Group,Rogers,Arkansas,72758,United States,
				-	-	DB11363	ALK	ALECTINIB	-	-	-	Highlands Oncology Group,Rogers,Arkansas,72758,United States,
				-	-	-	-	-	-	-	-	Chao Family Comprehensive Cancer Center,Orange,California,92868-3201,United States,
				-	-	-	-	-	-	-	-	Ship Drugs To: UC Irvine Medical Center,Orange,California,92868,United States,
				-	-	-	-	-	-	-	-	DRUG SHIPMENT: University of Colorado Cancer Center,Aurora,Colorado,80045,United States,
				-	-	-	-	-	-	-	-	University of Colorado Cancer Center,Aurora,Colorado,80045,United States,
				-	-	-	-	-	-	-	-	University of Colorado Hospital,Aurora,Colorado,80045,United States,
				-	-	-	-	-	-	-	-	MDZ: Yale-New Haven Hospital,New Haven,Connecticut,06504,United States,
				-	-	-	-	-	-	-	-	Smilow cancer Hospital at Yale-New Haven,New Haven,Connecticut,06510,United States,
				-	-	-	-	-	-	-	-	Drug Shipment Address & Pharmacist Designees, GUMC,Washington,District of Columbia,20007,United States,
				-	-	-	-	-	-	-	-	Georgetown University Medical Center,Washington,District of Columbia,20007,United States,
				-	-	-	-	-	-	-	-	Massachusetts General Hospital Cancer Center,Boston,Massachusetts,02114-2696,United States,
				-	-	-	-	-	-	-	-	Massachusetts General Hospital,Boston,Massachusetts,02114,United States,
				-	-	-	-	-	-	-	-	Brigham and Women's Hospital,Boston,Massachusetts,02115,United States,
				-	-	-	-	-	-	-	-	Dana Farber Cancer Institute,Boston,Massachusetts,02115,United States,
				-	-	-	-	-	-	-	-	Karmanos Cancer Institute,Detroit,Michigan,48201,United States,
				-	-	-	-	-	-	-	-	Ship Drug to: Karmanos Center Institute,Detroit,Michigan,48201,United States,
				-	-	-	-	-	-	-	-	Karmanos Cancer Institute at Farmington Hills,Farmington Hills,Michigan,48334,United States,
				-	-	-	-	-	-	-	-	Siteman Cancer Center-West County,Creve Coeur,Missouri,63141,United States,
				-	-	-	-	-	-	-	-	Barnes-Jewish Hospital,Saint Louis,Missouri,63110,United States,
				-	-	-	-	-	-	-	-	Washington University Infusion Center Pharmacy,Saint Louis,Missouri,63110,United States,
				-	-	-	-	-	-	-	-	Washington University School of Medicine,Saint Louis,Missouri,63110,United States,
				-	-	-	-	-	-	-	-	Siteman Cancer Center-South County,Saint Louis,Missouri,63129,United States,
				-	-	-	-	-	-	-	-	Memorial Sloan Kettering Cancer Center,New York,New York,10022,United States,
				-	-	-	-	-	-	-	-	Memorial Sloan Kettering Cancer Center,New York,New York,10065,United States,
				-	-	-	-	-	-	-	-	SUNY Upstate Medical University,Syracuse,New York,13210,United States,
				-	-	-	-	-	-	-	-	Fox Chase Cancer Center (Drug Shipment Address),Philadelphia,Pennsylvania,19111,United States,
				-	-	-	-	-	-	-	-	Fox Chase Cancer Center,Philadelphia,Pennsylvania,19111,United States,
				-	-	-	-	-	-	-	-	Hillman Cancer Center,Pittsburgh,Pennsylvania,15232,United States,
				-	-	-	-	-	-	-	-	University of Pittsburgh Medical Center,Pittsburgh,Pennsylvania,15232,United States,
				-	-	-	-	-	-	-	-	UPMC Cancer Pavilion,Pittsburgh,Pennsylvania,15232,United States,
				-	-	-	-	-	-	-	-	Tennessee Oncology, PLLC,Nashville,Tennessee,37203-1625,United States,
				-	-	-	-	-	-	-	-	Tennessee Oncology, PLLC,Nashville,Tennessee,37203,United States,
				-	-	-	-	-	-	-	-	The Sarah Cannon Research Institute,Nashville,Tennessee,37203,United States,
ALK	NCT01999972	A Phase 1b Study Of Axitinib In Combination With Crizotinib In Patients With Advanced Solid Tumors	Phase 1	Advanced Solid Tumors	AXITINIB	DB08865	ALK	CRIZOTINIB	-	-	-	University of Chicago Medical Center,Chicago,Illinois,60637,United States,
				-	CRIZOTINIB	DB09063	ALK	CERITINIB	-	-	-	Investigational Drug Services IUHSCC,Indianapolis,Indiana,46202,United States,
				-	-	DB11363	ALK	ALECTINIB	-	-	-	IU Health University Hospital,Indianapolis,Indiana,46202,United States,
				-	-	-	-	-	-	-	-	Massachusetts General Hospital,Boston,Massachusetts,02114,United States,
				-	-	-	-	-	-	-	-	Wayne State University, Dept. of Oncology,Detroit,Michigan,48201,United States,
				-	-	-	-	-	-	-	-	University of Minnesota Health Clinics and Surgery Center,Minneapolis,Minnesota,55455,United States,
				-	-	-	-	-	-	-	-	University of Minnesota Medical Center, Fairview IDS Pharmacy,Minneapolis,Minnesota,55455,United States,
				-	-	-	-	-	-	-	-	University of Minnesota Medical Center, Fairview,Minneapolis,Minnesota,55455,United States,
				-	-	-	-	-	-	-	-	University of Minnesota Physicians Masonic Cancer Center,Minneapolis,Minnesota,55455,United States,
				-	-	-	-	-	-	-	-	Cleveland Clinic,Cleveland,Ohio,44195,United States,
				-	-	-	-	-	-	-	-	Huntsman Cancer Hospital,Salt Lake City,Utah,84112,United States,
				-	-	-	-	-	-	-	-	Huntsman Cancer Institute,Salt Lake City,Utah,84112,United States,
				-	-	-	-	-	-	-	-	John A Moran Eye Center,Salt Lake City,Utah,84132,United States,
				-	-	-	-	-	-	-	-	University Station Ophthalmology Clinic,Madison,Wisconsin,53705,United States,
				-	-	-	-	-	-	-	-	University of Wisconsin Hospital and Clinics,Madison,Wisconsin,53792,United States,
ALK	NCT02013219	A Phase 1b Study of Atezolizumab in Combination With Erlotinib or Alectinib in Participants With Non-Small Cell Lung Cancer	Phase 1	Non-Small Cell Lung Cancer	ATEZOLIZUMAB	DB08865	ALK	CRIZOTINIB	-	-	-	Orange,California,92868,United States,
				-	ALECTINIB	DB09063	ALK	CERITINIB	-	-	-	New Haven,Connecticut,06510,United States,
				-	ERLOTINIB	DB11363	ALK	ALECTINIB	-	-	-	Orlando,Florida,32904,United States,
				-	-	-	-	-	-	-	-	Chicago,Illinois,60637,United States,
				-	-	-	-	-	-	-	-	Boston,Massachusetts,02114,United States,
				-	-	-	-	-	-	-	-	Boston,Massachusetts,02215,United States,
				-	-	-	-	-	-	-	-	Detroit,Michigan,48201,United States,
				-	-	-	-	-	-	-	-	New York,New York,10065,United States,
				-	-	-	-	-	-	-	-	Cleveland,Ohio,44106,United States,
				-	-	-	-	-	-	-	-	Greenville,South Carolina,29605,United States,
ALK	NCT02097810	Study of Oral RXDX-101 in Adult Patients With Locally Advanced or Metastatic Cancer Targeting NTRK1, NTRK2, NTRK3, ROS1, or ALK Molecular Alterations.	Phase 1	Locally Advanced Solid Tumors	ENTRECTINIB	DB08865	ALK	CRIZOTINIB	-	-	-	Chao Family Comprehensive Cancer Center at UC Irvine,Irvine,California,United States,
				Metastatic Solid Tumors	-	DB09063	ALK	CERITINIB	-	-	-	University of Colorado Cancer Center,Aurora,Colorado,80045,United States,
				-	-	DB11363	ALK	ALECTINIB	-	-	-	Lombardi Comprehensive Cancer Center at Georgetown,Washington D.C.,District of Columbia,United States,
				-	-	-	-	-	-	-	-	Sarah Cannon Research Institute,Sarasota,Florida,34232,United States,
				-	-	-	-	-	-	-	-	Massachusetts General Hospital/Dana Farber Cancer Institute,Boston,Massachusetts,02114,United States,
				-	-	-	-	-	-	-	-	Memorial Sloan Kettering Cancer Center,New York,New York,10065,United States,
				-	-	-	-	-	-	-	-	Sarah Cannon Research Institute,Nashville,Tennessee,37203,United States,
				-	-	-	-	-	-	-	-	University of Texas M.D. Anderson Cancer Center,Houston,Texas,77030,United States,
ALK	NCT02134912	S1300: Pemetrexed Disodium With or Without Crizotinib in Treating Patients With Stage IV Non-Small Cell Lung Cancer That Has Progressed After Crizotinib	Phase 2	Adenocarcinoma of the Lung	CRIZOTINIB	DB08865	ALK	CRIZOTINIB	-	-	-	University of California Davis Comprehensive Cancer Center,Tianhong (. Li,Sacramento,California,95817,United States,916-734-3089,
				Large Cell Lung Cancer	PEMETREXED DISODIUM	DB09063	ALK	CERITINIB	-	-	-	University of Colorado Cancer Center - Anschutz Cancer Pavilion,William T. Purcell,Aurora,Colorado,80045,United States,720-848-0650,
				Recurrent Non-small Cell Lung Cancer	-	DB11363	ALK	ALECTINIB	-	-	-	Saint Francis Hospital and Medical Center,Christopher M. Reynolds,Hartford,Connecticut,06105,United States,734-712-4673,
				Stage IV Non-small Cell Lung Cancer	-	-	-	-	-	-	-	Saint Alphonsus Cancer Care Center-Boise,Christopher M. Reynolds,Boise,Idaho,83706,United States,734-712-4673,
				-	-	-	-	-	-	-	-	Kootenai Medical Center,Benjamin T. Marchello,Coeur D'Alene,Idaho,83814,United States,800-648-6274,
				-	-	-	-	-	-	-	-	Kootenai Cancer Center,Benjamin T. Marchello,Post Falls,Idaho,83854,United States,800-648-6274,
				-	-	-	-	-	-	-	-	Kootenai Cancer,Benjamin T. Marchello,Sandpoint,Idaho,83864,United States,800-648-6274,
				-	-	-	-	-	-	-	-	Good Samaritan Regional Health Center,Jay W. Carlson,Mount Vernon,Illinois,62864,United States,800-821-7532,
				-	-	-	-	-	-	-	-	Reid Hospital and Health Care Services,Howard M. Gross,Richmond,Indiana,47374,United States,937-775-1350,
				-	-	-	-	-	-	-	-	Oncology Hematology Care Inc-Crestview,Howard M. Gross,Crestview Hills,Kentucky,41017,United States,937-775-1350,
				-	-	-	-	-	-	-	-	Saint Joseph Mercy Hospital,Christopher M. Reynolds,Ann Arbor,Michigan,48106-0995,United States,734-712-4673,
				-	-	-	-	-	-	-	-	Oakwood Hospital and Medical Center,Christopher M. Reynolds,Dearborn,Michigan,48124,United States,734-712-4673,
				-	-	-	-	-	-	-	-	Wayne State University/Karmanos Cancer Institute,Antoinette J. Wozniak,Detroit,Michigan,48201,United States,313-576-9363,
				-	-	-	-	-	-	-	-	Henry Ford Hospital,Robert A. Chapman,Detroit,Michigan,48202,United States,313-916-1784,
				-	-	-	-	-	-	-	-	Saint John Hospital and Medical Center,Christopher M. Reynolds,Detroit,Michigan,48236,United States,734-712-4673,
				-	-	-	-	-	-	-	-	Weisberg Cancer Treatment Center,Antoinette J. Wozniak,Farmington Hills,Michigan,48334,United States,313-576-9363,
				-	-	-	-	-	-	-	-	Hurley Medical Center,Christopher M. Reynolds,Flint,Michigan,48502,United States,734-712-4673,
				-	-	-	-	-	-	-	-	Genesys Hurley Cancer Institute,Christopher M. Reynolds,Flint,Michigan,48503,United States,734-712-4673,
				-	-	-	-	-	-	-	-	Allegiance Health,Christopher M. Reynolds,Jackson,Michigan,49201,United States,734-712-4673,
				-	-	-	-	-	-	-	-	Sparrow Hospital,Christopher M. Reynolds,Lansing,Michigan,48912,United States,734-712-4673,
				-	-	-	-	-	-	-	-	Saint Mary Mercy Hospital,Christopher M. Reynolds,Livonia,Michigan,48154,United States,734-712-4673,
				-	-	-	-	-	-	-	-	Saint Joseph Mercy Oakland,Christopher M. Reynolds,Pontiac,Michigan,48341,United States,734-712-4673,
				-	-	-	-	-	-	-	-	Saint Joseph Mercy Port Huron,Christopher M. Reynolds,Port Huron,Michigan,48060,United States,734-712-4673,
				-	-	-	-	-	-	-	-	Saint Mary's of Michigan,Christopher M. Reynolds,Saginaw,Michigan,48601,United States,734-712-4673,
				-	-	-	-	-	-	-	-	Saint John Macomb-Oakland Hospital,Christopher M. Reynolds,Warren,Michigan,48093,United States,734-712-4673,
				-	-	-	-	-	-	-	-	Central Care Cancer Center-Carrie J Babb Cancer Center,Jay W. Carlson,Bolivar,Missouri,65613,United States,800-821-7532,
				-	-	-	-	-	-	-	-	CoxHealth Cancer Center,Jay W. Carlson,Branson,Missouri,65616,United States,800-821-7532,
				-	-	-	-	-	-	-	-	Freeman Health System,Jay W. Carlson,Joplin,Missouri,64804,United States,800-821-7532,
				-	-	-	-	-	-	-	-	Mercy Hospital-Joplin,Jay W. Carlson,Joplin,Missouri,64804,United States,800-821-7532,
				-	-	-	-	-	-	-	-	Phelps County Regional Medical Center,Jay W. Carlson,Rolla,Missouri,65401,United States,800-821-7532,
				-	-	-	-	-	-	-	-	Saint John's Clinic-Rolla-Cancer and Hematology,Jay W. Carlson,Rolla,Missouri,65401,United States,800-821-7532,
				-	-	-	-	-	-	-	-	Saint Louis Cancer and Breast Institute-South City,Jay W. Carlson,Saint Louis,Missouri,63109,United States,800-821-7532,
				-	-	-	-	-	-	-	-	Saint John's Mercy Medical Center,Jay W. Carlson,Saint Louis,Missouri,63141,United States,800-821-7532,
				-	-	-	-	-	-	-	-	Mercy Hospital Springfield,Jay W. Carlson,Springfield,Missouri,65804,United States,800-821-7532,
				-	-	-	-	-	-	-	-	CoxHealth South Hospital,Jay W. Carlson,Springfield,Missouri,65807,United States,800-821-7532,
				-	-	-	-	-	-	-	-	Montana Cancer Consortium CCOP,Benjamin T. Marchello,Billings,Montana,59101,United States,800-648-6274,
				-	-	-	-	-	-	-	-	Saint Vincent Healthcare,Benjamin T. Marchello,Billings,Montana,59101,United States,800-648-6274,
				-	-	-	-	-	-	-	-	Billings Clinic Cancer Center,Benjamin T. Marchello,Billings,Montana,59107,United States,800-648-6274,
				-	-	-	-	-	-	-	-	Bozeman Deaconess Hospital,Benjamin T. Marchello,Bozeman,Montana,59715,United States,800-648-6274,
				-	-	-	-	-	-	-	-	Saint James Community Hospital and Cancer Treatment Center,Benjamin T. Marchello,Butte,Montana,59701,United States,800-648-6274,
				-	-	-	-	-	-	-	-	Benefis Healthcare- Sletten Cancer Institute,Benjamin T. Marchello,Great Falls,Montana,59405,United States,800-648-6274,
				-	-	-	-	-	-	-	-	Saint Peter's Community Hospital,Benjamin T. Marchello,Helena,Montana,59601,United States,800-648-6274,
				-	-	-	-	-	-	-	-	Kalispell Regional Medical Center,Benjamin T. Marchello,Kalispell,Montana,59901,United States,800-648-6274,
				-	-	-	-	-	-	-	-	Community Medical Hospital,Benjamin T. Marchello,Missoula,Montana,59801,United States,800-648-6274,
				-	-	-	-	-	-	-	-	Saint Patrick Hospital - Community Hospital,Benjamin T. Marchello,Missoula,Montana,59802,United States,800-648-6274,
				-	-	-	-	-	-	-	-	Nebraska Hematology and Oncology,Gamini S. Soori,Lincoln,Nebraska,68506,United States,mwilwerding@mvcc.cc,402-991-8070,
				-	-	-	-	-	-	-	-	Nebraska Cancer Research Center,Gamini S. Soori,Lincoln,Nebraska,68510,United States,mwilwerding@mvcc.cc,402-991-8070,
				-	-	-	-	-	-	-	-	Southeast Nebraska Hematology and Oncology Consultants, P.C,Gamini S. Soori,Lincoln,Nebraska,68510,United States,mwilwerding@mvcc.cc,402-991-8070,
				-	-	-	-	-	-	-	-	Faith Regional Medical Offices West,Gamini S. Soori,Norfolk,Nebraska,68701,United States,mwilwerding@mvcc.cc,402-991-8070,
				-	-	-	-	-	-	-	-	Missouri Valley Cancer Consortium,Gamini S. Soori,Omaha,Nebraska,68106,United States,mwilwerding@mvcc.cc,402-991-8070,
				-	-	-	-	-	-	-	-	Oncology Hematology West,Gamini S. Soori,Omaha,Nebraska,68124,United States,mwilwerding@mvcc.cc,402-991-8070,
				-	-	-	-	-	-	-	-	Regional West Medical Center,Gamini S. Soori,Scottsbluff,Nebraska,69361,United States,mwilwerding@mvcc.cc,402-991-8070,
				-	-	-	-	-	-	-	-	Orange Regional Medical Center,Jeffrey M. Stewart,Middletown,New York,10940,United States,845-342-7609,
				-	-	-	-	-	-	-	-	Strecker Cancer Center-Belpre,John P. Kuebler,Belpre,Ohio,45714,United States,614-566-3275,
				-	-	-	-	-	-	-	-	Miami Valley Hospital South,Howard M. Gross,Centerville,Ohio,45459,United States,937-775-1350,
				-	-	-	-	-	-	-	-	Adena Regional Medical Center,John P. Kuebler,Chillicothe,Ohio,45601,United States,614-566-3275,
				-	-	-	-	-	-	-	-	Oncology Hematology Care Inc-Mercy West,Howard M. Gross,Cincinnati,Ohio,45211,United States,937-775-1350,
				-	-	-	-	-	-	-	-	Oncology and Hematology Care Inc-Taft,Howard M. Gross,Cincinnati,Ohio,45219,United States,937-775-1350,
				-	-	-	-	-	-	-	-	Oncology Hematology Care Inc - Anderson,Howard M. Gross,Cincinnati,Ohio,45230,United States,937-775-1350,
				-	-	-	-	-	-	-	-	Oncology Hematology Care Inc - Kenwood,Howard M. Gross,Cincinnati,Ohio,45236,United States,937-775-1350,
				-	-	-	-	-	-	-	-	Oncology Hematology Care Inc-Blue Ash,Howard M. Gross,Cincinnati,Ohio,45242,United States,937-775-1350,
				-	-	-	-	-	-	-	-	Columbus Oncology and Hematology Associates Inc,John P. Kuebler,Columbus,Ohio,43214,United States,614-566-3275,
				-	-	-	-	-	-	-	-	Riverside Methodist Hospital,John P. Kuebler,Columbus,Ohio,43214,United States,614-566-3275,
				-	-	-	-	-	-	-	-	Grant Medical Center,John P. Kuebler,Columbus,Ohio,43215,United States,614-566-3275,
				-	-	-	-	-	-	-	-	The Mark H Zangmeister Center,John P. Kuebler,Columbus,Ohio,43219,United States,614-566-3275,
				-	-	-	-	-	-	-	-	Mount Carmel Health Center West,John P. Kuebler,Columbus,Ohio,43222,United States,614-566-3275,
				-	-	-	-	-	-	-	-	Doctors Hospital,John P. Kuebler,Columbus,Ohio,43228,United States,614-566-3275,
				-	-	-	-	-	-	-	-	Good Samaritan Hospital - Dayton,Howard M. Gross,Dayton,Ohio,45406,United States,937-775-1350,
				-	-	-	-	-	-	-	-	Miami Valley Hospital,Howard M. Gross,Dayton,Ohio,45409,United States,937-775-1350,
				-	-	-	-	-	-	-	-	Samaritan North Health Center,Howard M. Gross,Dayton,Ohio,45415,United States,937-775-1350,
				-	-	-	-	-	-	-	-	Delaware Health Center-Grady Cancer Center,John P. Kuebler,Delaware,Ohio,43015,United States,614-566-3275,
				-	-	-	-	-	-	-	-	Delaware Radiation Oncology,John P. Kuebler,Delaware,Ohio,43015,United States,614-566-3275,
				-	-	-	-	-	-	-	-	Grady Memorial Hospital,John P. Kuebler,Delaware,Ohio,43015,United States,614-566-3275,
				-	-	-	-	-	-	-	-	Oncology Hematology Care Inc-Healthplex,Howard M. Gross,Fairfield,Ohio,45014,United States,937-775-1350,
				-	-	-	-	-	-	-	-	Blanchard Valley Hospital,Howard M. Gross,Findlay,Ohio,45840,United States,937-775-1350,
				-	-	-	-	-	-	-	-	Atrium Medical Center-Middletown Regional Hospital,Howard M. Gross,Franklin,Ohio,45005-1066,United States,937-775-1350,
				-	-	-	-	-	-	-	-	Wayne Hospital,Howard M. Gross,Greenville,Ohio,45331,United States,937-775-1350,
				-	-	-	-	-	-	-	-	Kettering Medical Center,Howard M. Gross,Kettering,Ohio,45429,United States,937-775-1350,
				-	-	-	-	-	-	-	-	Fairfield Medical Center,John P. Kuebler,Lancaster,Ohio,43130,United States,614-566-3275,
				-	-	-	-	-	-	-	-	Marietta Memorial Hospital,John P. Kuebler,Marietta,Ohio,45750,United States,614-566-3275,
				-	-	-	-	-	-	-	-	Knox Community Hospital,John P. Kuebler,Mount Vernon,Ohio,43050,United States,614-566-3275,
				-	-	-	-	-	-	-	-	Licking Memorial Hospital,John P. Kuebler,Newark,Ohio,43055,United States,614-566-3275,
				-	-	-	-	-	-	-	-	Newark Radiation Oncology,John P. Kuebler,Newark,Ohio,43055,United States,614-566-3275,
				-	-	-	-	-	-	-	-	Southern Ohio Medical Center,John P. Kuebler,Portsmouth,Ohio,45662,United States,614-566-3275,
				-	-	-	-	-	-	-	-	Springfield Regional Medical Center,John P. Kuebler,Springfield,Ohio,45505,United States,614-566-3275,
				-	-	-	-	-	-	-	-	Upper Valley Medical Center,Howard M. Gross,Troy,Ohio,45373,United States,937-775-1350,
				-	-	-	-	-	-	-	-	Saint Ann's Hospital,John P. Kuebler,Westerville,Ohio,43081,United States,614-566-3275,
				-	-	-	-	-	-	-	-	Wright-Patterson Medical Center,Howard M. Gross,Wright-Patterson Afb,Ohio,45433-5529,United States,937-775-1350,
				-	-	-	-	-	-	-	-	Genesis HealthCare System,John P. Kuebler,Zanesville,Ohio,43701,United States,614-566-3275,
				-	-	-	-	-	-	-	-	SWOG,David R. Camidge,Portland,Oregon,97239,United States,ross.camidge@ucdenver.edu,720-848-0449,
				-	-	-	-	-	-	-	-	Big Horn Basin Cancer Center,Benjamin T. Marchello,Cody,Wyoming,82414,United States,800-648-6274,
				-	-	-	-	-	-	-	-	Billings Clinic-Cody,Benjamin T. Marchello,Cody,Wyoming,82414,United States,800-648-6274,
				-	-	-	-	-	-	-	-	Welch Cancer Center,Benjamin T. Marchello,Sheridan,Wyoming,82801,United States,800-648-6274,
ALK	NCT02160106	First in Human Dose Escalation Study of TEW-7197 in Subjects With Advanced Stage Solid Tumors	Phase 1	Advanced Stage Solid Tumors	TEW-7197	DB08865	ALK	CRIZOTINIB	-	-	-	Durham,North Carolina,27710,United States,
				-	-	DB09063	ALK	CERITINIB	-	-	-	Nashville,Tennessee,37203,United States,
				-	-	DB11363	ALK	ALECTINIB	-	-	-	Nashville,Tennessee,37232,United States,
ALK	NCT02186821	Ceritinib (LDK378) for Patients Whose Tumors Have Aberrations in ALK or ROS1 (SIGNATURE)	Phase 2	Tumors With Aberrations in ALK or ROS1	CERITINIB (LDK378)	DB08865	ALK	CRIZOTINIB	-	-	-	Sarcoma Oncology Center,Sant Chawla,Santa Monica,California,90403,United States,310-522-9999,
				-	-	DB09063	ALK	CERITINIB	-	-	-	St Joseph Heritage Healthcare St. Joseph Heritage,Thomas Stanton,Santa Rosa,California,94503,United States,707-763-0600,
				-	-	DB11363	ALK	ALECTINIB	-	-	-	Sarah Cannon Research Institute @ HealthONE Presbyterian,Gerald Falchook,Denver,Colorado,80218,United States,720-754-2610,
				-	-	-	-	-	-	-	-	Rocky Mountain Cancer Centers Dept of Rocky Mountain (2),Ioana M. Hinshaw,Greenwood Village,Colorado,United States,303-388-4676,
				-	-	-	-	-	-	-	-	Florida Cancer Specialists Florida Cancer Specialists (31,Daniel L. Spitz,Fort Myers,Florida,33916,United States,561-366-4100,
				-	-	-	-	-	-	-	-	Florida Cancer Specialists Research Institute,Robert Whorf,Fort Myers,Florida,33916,United States,941-792-1881,
				-	-	-	-	-	-	-	-	Northwestern University Northwestern (6),Young L. Chae,Chicago,Illinois,60611,United States,312-695-0184,
				-	-	-	-	-	-	-	-	Horizon Oncology Center,Wael Harb,Lafayette,Indiana,47905,United States,765-446-5111,
				-	-	-	-	-	-	-	-	Maryland Oncology Hematology, P.A. Dept. of Assoc. Onc/Hem,Paul Thambi,Rockville,Maryland,20850,United States,
				-	-	-	-	-	-	-	-	Holy Cross Hospital Holy Cross (2),Cheryl Aylesworth,Silver Spring,Maryland,20910,United States,301-754-8556,
				-	-	-	-	-	-	-	-	Washington University School of Medicine Washington University (16),Ramaswamy Govindan,St. Louis,Missouri,63110,United States,314-362-6963,
				-	-	-	-	-	-	-	-	Southeast Nebraska Oncology,Steven Dunder,Lincoln,Nebraska,68510,United States,402-327-7363,
				-	-	-	-	-	-	-	-	Comprehensive Cancer Centers of Nevada CCC of Nevada (1),Fadi Braiteh,Las Vegas,Nevada,89109,United States,702-952-3426,
				-	-	-	-	-	-	-	-	University of New Mexico Hospital Cancer Care Alliance,Melanie Royce,Albuquerque,New Mexico,87106,United States,505-272-6057,
				-	-	-	-	-	-	-	-	New Mexico Oncology Hematology,Richard O. Giudice,Albuquerque,New Mexico,87109,United States,505-842-8171,
				-	-	-	-	-	-	-	-	Duke University Medical Center Seeley G. Mudd Bldg.,Herbert I. Hurwitz,Durham,North Carolina,27710,United States,919-681-6006,
				-	-	-	-	-	-	-	-	Wake Forest University Health Sciences Health Sciences,Glenn J. Lesser,Winston-Salem,North Carolina,27157,United States,336-716-7972,
				-	-	-	-	-	-	-	-	Sanford Hematology Oncology,Anu Goel Gaba,Fargo,North Dakota,58122,United States,701-234-2371,
				-	-	-	-	-	-	-	-	Columbus Hematology and Oncology PA Columbus Hem and Onc (2),Christopher George,Columbus,Ohio,39705,United States,614-442-3130,
				-	-	-	-	-	-	-	-	Salem Health,John Strother,Salem,Oregon,97309,United States,503-561-6455,
				-	-	-	-	-	-	-	-	Andrew & Patel Associates,,Robert Gordon,Camp Hill,Pennsylvania,17011,United States,717-761-8740,
				-	-	-	-	-	-	-	-	Eastern Regional Medical Center,Ankur Parikh,Philadelphia,Pennsylvania,19124,United States,215-537-7400,
				-	-	-	-	-	-	-	-	Rhode Island Hospital Rhode Island Hosp. (2),Howard Safran,Providence,Rhode Island,02903,United States,401-444-3059,
				-	-	-	-	-	-	-	-	Sanford Research Sanford Clinical Research,Steven Powell,Sioux Falls,South Dakota,57104,United States,605-328-8000,
				-	-	-	-	-	-	-	-	The West Clinic SC-4,Lee S. Schwartzberg,Memphis,Tennessee,38120,United States,901-683-0055,
				-	-	-	-	-	-	-	-	Oncology Consultants Oncology Group,Julio Peguero,Houston,Texas,77024,United States,832-824-5383,
				-	-	-	-	-	-	-	-	MD Anderson Cancer Center/University of Texas MD Anderson Cancer Center (3),Vivek Subbiah,Houston,Texas,77030,United States,216-255-2748,
				-	-	-	-	-	-	-	-	Utah Cancer Specialists Utah Cancer Specialists,Stephan D. Kendall,Salt Lake City,Utah,84106,United States,801-281-6863,
				-	-	-	-	-	-	-	-	Swedish Cancer Institute Swedish Cancer Institute,Erin Ellis,Seattle,Washington,98104,United States,
				-	-	-	-	-	-	-	-	Seattle Cancer Care Alliance Skagit Valley Hospital,George Gjerset,Seattle,Washington,98109-1023,United States,360-814-2146,
ALK	NCT02201992	Crizotinib in Treating Patients With Stage IB-IIIA Non-small Cell Lung Cancer That Has Been Removed by Surgery and ALK Fusion Mutations (An ALCHEMIST Treatment Trial)	Phase 3	Stage IB Non-Small Cell Lung Carcinoma	CRIZOTINIB	DB08865	ALK	CRIZOTINIB	-	-	-	University of Alabama at Birmingham Cancer Center,Francisco Robert,Birmingham,Alabama,35233,United States,205-934-0309,
				Stage IIA Non-Small Cell Lung Carcinoma	-	DB09063	ALK	CERITINIB	-	-	-	Southern Cancer Center PC-Providence,Brian J. Heller,Mobile,Alabama,36608,United States,dr.heller@southerncancercenter.com,251-631-3541,
				Stage IIB Non-Small Cell Lung Carcinoma	-	DB11363	ALK	ALECTINIB	-	-	-	Anchorage Radiation Therapy Center,Keith S. Lanier,Anchorage,Alaska,99504,United States,503-215-6412,
				Stage IIIA Non-Small Cell Lung Cancer	-	-	-	-	-	-	-	Alaska Breast Care and Surgery LLC,Keith S. Lanier,Anchorage,Alaska,99508,United States,503-215-6412,
				-	-	-	-	-	-	-	-	Alaska Oncology and Hematology LLC,Keith S. Lanier,Anchorage,Alaska,99508,United States,503-215-6412,
				-	-	-	-	-	-	-	-	Alaska Regional Hospital,Keith S. Lanier,Anchorage,Alaska,99508,United States,503-215-6412,
				-	-	-	-	-	-	-	-	Alaska Women's Cancer Care,Keith S. Lanier,Anchorage,Alaska,99508,United States,503-215-6412,
				-	-	-	-	-	-	-	-	Anchorage Oncology Centre,Keith S. Lanier,Anchorage,Alaska,99508,United States,503-215-6412,
				-	-	-	-	-	-	-	-	Katmai Oncology Group,Keith S. Lanier,Anchorage,Alaska,99508,United States,503-215-6412,
				-	-	-	-	-	-	-	-	Providence Alaska Medical Center,Keith S. Lanier,Anchorage,Alaska,99508,United States,503-215-6412,
				-	-	-	-	-	-	-	-	Fairbanks Memorial Hospital,John A. Keech,Fairbanks,Alaska,99701,United States,907-458-5380,
				-	-	-	-	-	-	-	-	Mayo Clinic in Arizona,Aaron S. Mansfield,Scottsdale,Arizona,85259,United States,507-538-7623,
				-	-	-	-	-	-	-	-	The University of Arizona Cancer Center-North Campus,Linda L. Garland,Tucson,Arizona,85719,United States,520-626-9008,
				-	-	-	-	-	-	-	-	The University of Arizona Medical Center-University Campus,Linda L. Garland,Tucson,Arizona,85724,United States,520-626-9008,
				-	-	-	-	-	-	-	-	Mercy Cancer Center-Hot Springs,Mehmet S. Copur,Hot Springs,Arkansas,71913,United States,800-998-2119,
				-	-	-	-	-	-	-	-	Kaiser Permanente-Anaheim,Jonathan A. Polikoff,Anaheim,California,92807,United States,jonathan.a.polikoff@kp.org,619-641-2838,
				-	-	-	-	-	-	-	-	Kaiser Permanente-Deer Valley Medical Center,Tatjana Kolevska,Antioch,California,94531,United States,626-564-3455,
				-	-	-	-	-	-	-	-	Sutter Auburn Faith Hospital,Peter P. Yu,Auburn,California,95602,United States,bernicl@sutterhealth.org,415-209-2686,
				-	-	-	-	-	-	-	-	Sutter Cancer Centers Radiation Oncology Services-Auburn,Peter P. Yu,Auburn,California,95603,United States,bernicl@sutterhealth.org,415-209-2686,
				-	-	-	-	-	-	-	-	Kaiser Permanente-Baldwin Park,Jonathan A. Polikoff,Baldwin Park,California,91706,United States,jonathan.a.polikoff@kp.org,619-641-2838,
				-	-	-	-	-	-	-	-	Kaiser Permanente-Bellflower,Jonathan A. Polikoff,Bellflower,California,90706,United States,jonathan.a.polikoff@kp.org,619-641-2838,
				-	-	-	-	-	-	-	-	Alta Bates Summit Medical Center-Herrick Campus,Peter P. Yu,Berkeley,California,94704,United States,bernicl@sutterhealth.org,415-209-2686,
				-	-	-	-	-	-	-	-	Providence Saint Joseph Medical Center/Disney Family Cancer Center,Keith S. Lanier,Burbank,California,91505,United States,503-215-6412,
				-	-	-	-	-	-	-	-	Mills - Peninsula Hospitals,Peter P. Yu,Burlingame,California,94010,United States,bernicl@sutterhealth.org,415-209-2686,
				-	-	-	-	-	-	-	-	Sutter Cancer Centers Radiation Oncology Services-Cameron Park,Peter P. Yu,Cameron Park,California,95682,United States,bernicl@sutterhealth.org,415-209-2686,
				-	-	-	-	-	-	-	-	Eden Hospital Medical Center,Peter P. Yu,Castro Valley,California,94546,United States,bernicl@sutterhealth.org,408-730-2801,
				-	-	-	-	-	-	-	-	John Muir Medical Center-Concord Campus,Kasra Karamlou,Concord,California,94520,United States,925-674-2580,
				-	-	-	-	-	-	-	-	Sutter Davis Hospital,Peter P. Yu,Davis,California,95616,United States,bernicl@sutterhealth.org,415-209-2686,
				-	-	-	-	-	-	-	-	City of Hope Comprehensive Cancer Center,Mihaela C. Cristea,Duarte,California,91010,United States,becomingapatient@coh.org,800-826-4673,
				-	-	-	-	-	-	-	-	Bay Area Breast Surgeons Inc,James H. Feusner,Emeryville,California,94608,United States,jfeusner@mail.cho.org,510-601-3916,
				-	-	-	-	-	-	-	-	Epic Care Partners in Cancer Care,James H. Feusner,Emeryville,California,94608,United States,jfeusner@mail.cho.org,510-601-3916,
				-	-	-	-	-	-	-	-	Northbay Cancer Center,Brian G. Vikstrom,Fairfield,California,94533,United States,707-646-4016,
				-	-	-	-	-	-	-	-	Kaiser Permanente Hospital,Jonathan A. Polikoff,Fontana,California,92335,United States,jonathan.a.polikoff@kp.org,619-641-2838,
				-	-	-	-	-	-	-	-	Kaiser Permanente-Fremont,Tatjana Kolevska,Fremont,California,94538,United States,626-564-3455,
				-	-	-	-	-	-	-	-	Kaiser Permanente,Tatjana Kolevska,Fresno,California,93720,United States,626-564-3455,
				-	-	-	-	-	-	-	-	Saint Jude Medical Center,William E. Lawler,Fullerton,California,92835,United States,714-446-5642,
				-	-	-	-	-	-	-	-	Marin Cancer Care Inc,Peter D. Eisenberg,Greenbrae,California,94904,United States,info@marinspecialtycare.com,415-925-5000,
				-	-	-	-	-	-	-	-	Marin General Hospital,Peter D. Eisenberg,Greenbrae,California,94904,United States,info@marinspecialtycare.com,415-925-5000,
				-	-	-	-	-	-	-	-	Kaiser Permanente - Harbor City,Jonathan A. Polikoff,Harbor City,California,90710,United States,jonathan.a.polikoff@kp.org,619-641-2838,
				-	-	-	-	-	-	-	-	Kaiser Permanente-Irvine,Jonathan A. Polikoff,Irvine,California,92618,United States,jonathan.a.polikoff@kp.org,619-641-2838,
				-	-	-	-	-	-	-	-	UC San Diego Moores Cancer Center,Lyudmila A. Bazhenova,La Jolla,California,92093,United States,cancercto@ucsd.edu,858-822-5354,
				-	-	-	-	-	-	-	-	Loma Linda University Medical Center,Hamid R. Mirshahidi,Loma Linda,California,92354,United States,909-558-3375,
				-	-	-	-	-	-	-	-	Kaiser Permanente Los Angeles Medical Center,Jonathan A. Polikoff,Los Angeles,California,90027,United States,jonathan.a.polikoff@kp.org,619-641-2838,
				-	-	-	-	-	-	-	-	Los Angeles County-USC Medical Center,Barbara J. Gitlitz,Los Angeles,California,90033,United States,323-865-0451,
				-	-	-	-	-	-	-	-	USC / Norris Comprehensive Cancer Center,Barbara J. Gitlitz,Los Angeles,California,90033,United States,323-865-0451,
				-	-	-	-	-	-	-	-	Kaiser Permanente-Cadillac,Jonathan A. Polikoff,Los Angeles,California,90034,United States,jonathan.a.polikoff@kp.org,619-641-2838,
				-	-	-	-	-	-	-	-	Cedars-Sinai Medical Center,Ronald B. Natale,Los Angeles,California,90048,United States,310-423-8965,
				-	-	-	-	-	-	-	-	Contra Costa Regional Medical Center,James H. Feusner,Martinez,California,94553-3156,United States,jfeusner@mail.cho.org,510-601-3916,
				-	-	-	-	-	-	-	-	Fremont - Rideout Cancer Center,Tianhong (. Li,Marysville,California,95901,United States,916-734-3089,
				-	-	-	-	-	-	-	-	Memorial Medical Center,Peter P. Yu,Modesto,California,95355,United States,bernicl@sutterhealth.org,415-209-2686,
				-	-	-	-	-	-	-	-	Kaiser Permanente-Modesto,Tatjana Kolevska,Modesto,California,95356,United States,626-564-3455,
				-	-	-	-	-	-	-	-	Palo Alto Medical Foundation-Camino Division,Peter P. Yu,Mountain View,California,94040,United States,bernicl@sutterhealth.org,415-209-2686,
				-	-	-	-	-	-	-	-	Palo Alto Medical Foundation-Gynecologic Oncology,Peter P. Yu,Mountain View,California,94040,United States,bernicl@sutterhealth.org,415-209-2686,
				-	-	-	-	-	-	-	-	Sutter Cancer Research Consortium,Peter P. Yu,Novato,California,94945,United States,bernicl@sutterhealth.org,415-209-2686,
				-	-	-	-	-	-	-	-	Alta Bates Summit Medical Center - Summit Campus,James H. Feusner,Oakland,California,94609,United States,jfeusner@mail.cho.org,510-601-3916,
				-	-	-	-	-	-	-	-	Bay Area Tumor Institute,James H. Feusner,Oakland,California,94609,United States,jfeusner@mail.cho.org,510-601-3916,
				-	-	-	-	-	-	-	-	Kaiser Permanente Oakland-Broadway,Tatjana Kolevska,Oakland,California,94611,United States,626-564-3455,
				-	-	-	-	-	-	-	-	Kaiser Permanente-Oakland,Tatjana Kolevska,Oakland,California,94611,United States,626-564-3455,
				-	-	-	-	-	-	-	-	Saint Joseph Hospital - Orange,Timothy E. Byun,Orange,California,92868,United States,714-734-6220,
				-	-	-	-	-	-	-	-	Desert Regional Medical Center,Elber S. Camacho,Palm Springs,California,92262,United States,760-416-4730,
				-	-	-	-	-	-	-	-	Palo Alto Medical Foundation Health Care,Peter P. Yu,Palo Alto,California,94301,United States,bernicl@sutterhealth.org,415-209-2686,
				-	-	-	-	-	-	-	-	Stanford Cancer Institute,Heather A. Wakelee,Palo Alto,California,94304,United States,ccto-office@stanford.edu,650-724-3697,
				-	-	-	-	-	-	-	-	Kaiser Permanente - Panorama City,Jonathan A. Polikoff,Panorama City,California,91402,United States,jonathan.a.polikoff@kp.org,619-641-2838,
				-	-	-	-	-	-	-	-	Keck Medical Center of USC Pasadena,Barbara J. Gitlitz,Pasadena,California,91105,United States,323-865-0451,
				-	-	-	-	-	-	-	-	PCR Oncology,John A. Ellerton,Pismo Beach,California,93449,United States,702-384-0013,
				-	-	-	-	-	-	-	-	Kaiser Permanente-Rancho Cordova Cancer Center,Tatjana Kolevska,Rancho Cordova,California,95670,United States,626-564-3455,
				-	-	-	-	-	-	-	-	Kaiser Permanente-Redwood City,Tatjana Kolevska,Redwood City,California,94063,United States,626-564-3455,
				-	-	-	-	-	-	-	-	Kaiser Permanente-Richmond,Tatjana Kolevska,Richmond,California,94801,United States,626-564-3455,
				-	-	-	-	-	-	-	-	Kaiser Permanente-Riverside,Jonathan A. Polikoff,Riverside,California,92505,United States,jonathan.a.polikoff@kp.org,619-641-2838,
				-	-	-	-	-	-	-	-	Rohnert Park Cancer Center,Tatjana Kolevska,Rohnert Park,California,94928,United States,626-564-3455,
				-	-	-	-	-	-	-	-	Kaiser Permanente-Roseville,Tatjana Kolevska,Roseville,California,95661,United States,626-564-3455,
				-	-	-	-	-	-	-	-	Sutter Cancer Centers Radiation Oncology Services-Roseville,Peter P. Yu,Roseville,California,95661,United States,bernicl@sutterhealth.org,415-209-2686,
				-	-	-	-	-	-	-	-	Sutter Roseville Medical Center,Peter P. Yu,Roseville,California,95661,United States,bernicl@sutterhealth.org,415-209-2686,
				-	-	-	-	-	-	-	-	The Permanente Medical Group-Roseville Radiation Oncology,Tatjana Kolevska,Roseville,California,95678,United States,626-564-3455,
				-	-	-	-	-	-	-	-	Sutter General Hospital,Peter P. Yu,Sacramento,California,95816,United States,bernicl@sutterhealth.org,415-209-2686,
				-	-	-	-	-	-	-	-	University of California Davis Comprehensive Cancer Center,Tianhong (. Li,Sacramento,California,95817,United States,916-734-3089,
				-	-	-	-	-	-	-	-	Kaiser Permanente-South Sacramento,Tatjana Kolevska,Sacramento,California,95823,United States,626-564-3455,
				-	-	-	-	-	-	-	-	South Sacramento Cancer Center,Tatjana Kolevska,Sacramento,California,95823,United States,626-564-3455,
				-	-	-	-	-	-	-	-	Kaiser Permanente - Sacramento,Tatjana Kolevska,Sacramento,California,95825,United States,626-564-3455,
				-	-	-	-	-	-	-	-	Saint Helena Hospital,Gregory B. Smith,Saint Helena,California,94574,United States,707-967-3698,
				-	-	-	-	-	-	-	-	Kaiser Permanente-San Diego Mission,Jonathan A. Polikoff,San Diego,California,92108,United States,jonathan.a.polikoff@kp.org,619-641-2838,
				-	-	-	-	-	-	-	-	Kaiser Permanente-San Diego Zion,Jonathan A. Polikoff,San Diego,California,92120,United States,jonathan.a.polikoff@kp.org,619-641-2838,
				-	-	-	-	-	-	-	-	Naval Medical Center -San Diego,Preston S. Gable,San Diego,California,92134,United States,preston.s.gable.civ@mail.mil,619-532-9196,
				-	-	-	-	-	-	-	-	Kaiser Permanente-San Francisco,Tatjana Kolevska,San Francisco,California,94115,United States,626-564-3455,
				-	-	-	-	-	-	-	-	California Pacific Medical Center-Pacific Campus,Peter P. Yu,San Francisco,California,94118,United States,bernicl@sutterhealth.org,415-209-2686,
				-	-	-	-	-	-	-	-	Kaiser Permanente-Santa Teresa-San Jose,Tatjana Kolevska,San Jose,California,95119,United States,626-564-3455,
				-	-	-	-	-	-	-	-	Kaiser Permanente San Leandro,Tatjana Kolevska,San Leandro,California,94577,United States,626-564-3455,
				-	-	-	-	-	-	-	-	Kaiser Permanente-San Marcos,Jonathan A. Polikoff,San Marcos,California,92069,United States,jonathan.a.polikoff@kp.org,619-641-2838,
				-	-	-	-	-	-	-	-	Kaiser Permanente-San Rafael,Tatjana Kolevska,San Rafael,California,94903,United States,626-564-3455,
				-	-	-	-	-	-	-	-	Kaiser Permanente Medical Center - Santa Clara,Tatjana Kolevska,Santa Clara,California,95051,United States,626-564-3455,
				-	-	-	-	-	-	-	-	Palo Alto Medical Foundation-Santa Cruz,Peter P. Yu,Santa Cruz,California,95065,United States,bernicl@sutterhealth.org,415-209-2686,
				-	-	-	-	-	-	-	-	Kaiser Permanente-Santa Rosa,Tatjana Kolevska,Santa Rosa,California,95403,United States,626-564-3455,
				-	-	-	-	-	-	-	-	Sutter Pacific Medical Foundation,Peter P. Yu,Santa Rosa,California,95403,United States,bernicl@sutterhealth.org,415-209-2686,
				-	-	-	-	-	-	-	-	City of Hope South Pasadena,Mihaela C. Cristea,South Pasadena,California,91030,United States,becomingapatient@coh.org,800-826-4673,
				-	-	-	-	-	-	-	-	Kaiser Permanente Cancer Treatment Center,Tatjana Kolevska,South San Francisco,California,94080,United States,626-564-3455,
				-	-	-	-	-	-	-	-	Kaiser Permanente-South San Francisco,Tatjana Kolevska,South San Francisco,California,94080,United States,626-564-3455,
				-	-	-	-	-	-	-	-	Kaiser Permanente-Stockton,Tatjana Kolevska,Stockton,California,95210,United States,626-564-3455,
				-	-	-	-	-	-	-	-	Palo Atlo Medical Foundation-Sunnyvale,Peter P. Yu,Sunnyvale,California,94086,United States,bernicl@sutterhealth.org,415-209-2686,
				-	-	-	-	-	-	-	-	Sutter Cancer Centers Radiation Oncology Services-Vacaville,Peter P. Yu,Vacaville,California,95687,United States,bernicl@sutterhealth.org,415-209-2686,
				-	-	-	-	-	-	-	-	Kaiser Permanente Medical Center-Vacaville,Tatjana Kolevska,Vacaville,California,95688,United States,626-564-3455,
				-	-	-	-	-	-	-	-	Kaiser Permanente-Vallejo,Tatjana Kolevska,Vallejo,California,94589,United States,626-564-3455,
				-	-	-	-	-	-	-	-	Sutter Solano Medical Center/Cancer Center,Peter P. Yu,Vallejo,California,94589,United States,bernicl@sutterhealth.org,415-209-2686,
				-	-	-	-	-	-	-	-	Kaiser Permanente-Walnut Creek,Tatjana Kolevska,Walnut Creek,California,94596,United States,626-564-3455,
				-	-	-	-	-	-	-	-	John Muir Medical Center-Walnut Creek,Kasra Karamlou,Walnut Creek,California,94598,United States,925-674-2580,
				-	-	-	-	-	-	-	-	Presbyterian Intercommunity Hospital,Lisa S. Wang,Whittier,California,90602,United States,562-698-0811,
				-	-	-	-	-	-	-	-	Kaiser Permanente,Jonathan A. Polikoff,Woodland Hills,California,91367,United States,jonathan.a.polikoff@kp.org,619-641-2838,
				-	-	-	-	-	-	-	-	Rocky Mountain Cancer Centers-Aurora,Keren Sturtz,Aurora,Colorado,80012,United States,888-785-6789,
				-	-	-	-	-	-	-	-	The Medical Center of Aurora,Keren Sturtz,Aurora,Colorado,80012,United States,888-785-6789,
				-	-	-	-	-	-	-	-	University of Colorado Cancer Center - Anschutz Cancer Pavilion,William T. Purcell,Aurora,Colorado,80045,United States,720-848-0650,
				-	-	-	-	-	-	-	-	Boulder Community Hospital,Keren Sturtz,Boulder,Colorado,80301,United States,888-785-6789,
				-	-	-	-	-	-	-	-	Rocky Mountain Cancer Centers-Boulder,Keren Sturtz,Boulder,Colorado,80304,United States,888-785-6789,
				-	-	-	-	-	-	-	-	Penrose-Saint Francis Healthcare,Keren Sturtz,Colorado Springs,Colorado,80907,United States,888-785-6789,
				-	-	-	-	-	-	-	-	Rocky Mountain Cancer Centers-Penrose,Keren Sturtz,Colorado Springs,Colorado,80907,United States,888-785-6789,
				-	-	-	-	-	-	-	-	Memorial Hospital Colorado Springs,William T. Purcell,Colorado Springs,Colorado,80909,United States,720-848-0650,
				-	-	-	-	-	-	-	-	Denver Health Medical Center,Keren Sturtz,Denver,Colorado,80204,United States,888-785-6789,
				-	-	-	-	-	-	-	-	Kaiser Permanente-Franklin,Alexander Menter,Denver,Colorado,80205,United States,303-614-1300,
				-	-	-	-	-	-	-	-	Porter Adventist Hospital,Keren Sturtz,Denver,Colorado,80210,United States,888-785-6789,
				-	-	-	-	-	-	-	-	Colorado Blood Cancer Institute,Keren Sturtz,Denver,Colorado,80218,United States,888-785-6789,
				-	-	-	-	-	-	-	-	Presbyterian - Saint Lukes Medical Center - Health One,Keren Sturtz,Denver,Colorado,80218,United States,888-785-6789,
				-	-	-	-	-	-	-	-	Rocky Mountain Cancer Centers-Midtown,Keren Sturtz,Denver,Colorado,80218,United States,888-785-6789,
				-	-	-	-	-	-	-	-	SCL Health Saint Joseph Hospital,Keren Sturtz,Denver,Colorado,80218,United States,888-785-6789,
				-	-	-	-	-	-	-	-	Rocky Mountain Cancer Centers-Rose,Keren Sturtz,Denver,Colorado,80220,United States,888-785-6789,
				-	-	-	-	-	-	-	-	Rose Medical Center,Keren Sturtz,Denver,Colorado,80220,United States,888-785-6789,
				-	-	-	-	-	-	-	-	Mercy Medical Center,Keren Sturtz,Durango,Colorado,81301,United States,888-785-6789,
				-	-	-	-	-	-	-	-	Southwest Oncology PC,Keren Sturtz,Durango,Colorado,81301,United States,888-785-6789,
				-	-	-	-	-	-	-	-	Comprehensive Cancer Care and Research Institute of Colorado LLC,Keren Sturtz,Englewood,Colorado,80113,United States,888-785-6789,
				-	-	-	-	-	-	-	-	Swedish Medical Center,Keren Sturtz,Englewood,Colorado,80113,United States,888-785-6789,
				-	-	-	-	-	-	-	-	Poudre Valley Hospital,William T. Purcell,Fort Collins,Colorado,80524,United States,720-848-0650,
				-	-	-	-	-	-	-	-	Mountain Blue Cancer Care Center,Keren Sturtz,Golden,Colorado,80401,United States,888-785-6789,
				-	-	-	-	-	-	-	-	National Jewish Health-Western Hematology Oncology,Keren Sturtz,Golden,Colorado,80401,United States,888-785-6789,
				-	-	-	-	-	-	-	-	North Colorado Medical Center,Keren Sturtz,Greeley,Colorado,80631,United States,888-785-6789,
				-	-	-	-	-	-	-	-	Rocky Mountain Cancer Centers-Greenwood Village,Keren Sturtz,Greenwood Village,Colorado,80111,United States,888-785-6789,
				-	-	-	-	-	-	-	-	Kaiser Permanente-Rock Creek,Alexander Menter,Lafayette,Colorado,80026,United States,303-614-1300,
				-	-	-	-	-	-	-	-	Rocky Mountain Cancer Centers-Lakewood,Keren Sturtz,Lakewood,Colorado,80228,United States,888-785-6789,
				-	-	-	-	-	-	-	-	Saint Anthony Hospital,Keren Sturtz,Lakewood,Colorado,80228,United States,888-785-6789,
				-	-	-	-	-	-	-	-	Rocky Mountain Cancer Centers-Littleton,Keren Sturtz,Littleton,Colorado,80120,United States,888-785-6789,
				-	-	-	-	-	-	-	-	Littleton Adventist Hospital,Keren Sturtz,Littleton,Colorado,80122,United States,888-785-6789,
				-	-	-	-	-	-	-	-	Kaiser Permanente-Lone Tree,Alexander Menter,Lone Tree,Colorado,80124,United States,303-614-1300,
				-	-	-	-	-	-	-	-	Rocky Mountain Cancer Centers-Sky Ridge,Keren Sturtz,Lone Tree,Colorado,80124,United States,888-785-6789,
				-	-	-	-	-	-	-	-	Sky Ridge Medical Center,Keren Sturtz,Lone Tree,Colorado,80124,United States,888-785-6789,
				-	-	-	-	-	-	-	-	Longmont United Hospital,Keren Sturtz,Longmont,Colorado,80501,United States,888-785-6789,
				-	-	-	-	-	-	-	-	Rocky Mountain Cancer Centers-Longmont,Keren Sturtz,Longmont,Colorado,80501,United States,888-785-6789,
				-	-	-	-	-	-	-	-	McKee Medical Center,Keren Sturtz,Loveland,Colorado,80539,United States,888-785-6789,
				-	-	-	-	-	-	-	-	Parker Adventist Hospital,Keren Sturtz,Parker,Colorado,80138,United States,888-785-6789,
				-	-	-	-	-	-	-	-	Rocky Mountain Cancer Centers-Parker,Keren Sturtz,Parker,Colorado,80138,United States,888-785-6789,
				-	-	-	-	-	-	-	-	Saint Mary Corwin Medical Center,Keren Sturtz,Pueblo,Colorado,81004,United States,888-785-6789,
				-	-	-	-	-	-	-	-	Rocky Mountain Cancer Centers - Pueblo,Keren Sturtz,Pueblo,Colorado,81008,United States,888-785-6789,
				-	-	-	-	-	-	-	-	Rocky Mountain Cancer Centers-Thornton,Keren Sturtz,Thornton,Colorado,80260,United States,888-785-6789,
				-	-	-	-	-	-	-	-	SCL Health Lutheran Medical Center,Keren Sturtz,Wheat Ridge,Colorado,80033,United States,888-785-6789,
				-	-	-	-	-	-	-	-	Danbury Hospital,Robert A. Kloss,Danbury,Connecticut,06810,United States,203-739-8074,
				-	-	-	-	-	-	-	-	The Center for Cancer Care at Griffin Hospital,Ashita Talsania,Derby,Connecticut,06418,United States,860-482-5384,
				-	-	-	-	-	-	-	-	Smilow Cancer Hospital Care Center-Fairfield,Ashita Talsania,Fairfield,Connecticut,06824,United States,860-482-5384,
				-	-	-	-	-	-	-	-	Greenwich Hospital,Beverly J. Drucker,Greenwich,Connecticut,06830,United States,203-863-3698,
				-	-	-	-	-	-	-	-	Smilow Cancer Hospital-Hamden Care Center,Ashita Talsania,Hamden,Connecticut,06518,United States,860-482-5384,
				-	-	-	-	-	-	-	-	Hartford Hospital,Wylie D. Hosmer,Hartford,Connecticut,06102,United States,angie.yrayta@hhchealth.org,860-224-5900,
				-	-	-	-	-	-	-	-	Smilow Cancer Hospital Care Center at Saint Francis,Philip J. Stella,Hartford,Connecticut,06105,United States,734-712-4673,
				-	-	-	-	-	-	-	-	Yale-New Haven Hospital Saint Raphael Campus,Ashita Talsania,Hew Haven,Connecticut,06511,United States,860-482-5384,
				-	-	-	-	-	-	-	-	Middlesex Hospital,Susanna Hong,Middletown,Connecticut,06457,United States,860-358-2058,
				-	-	-	-	-	-	-	-	The Hospital of Central Connecticut,Wylie D. Hosmer,New Britain,Connecticut,06050,United States,angie.yrayta@hhchealth.org,860-224-5900,
				-	-	-	-	-	-	-	-	Smilow Cancer Center/Yale-New Haven Hospital,Ashita Talsania,New Haven,Connecticut,06510,United States,860-482-5384,
				-	-	-	-	-	-	-	-	Yale University,Ashita Talsania,New Haven,Connecticut,06520,United States,860-482-5384,
				-	-	-	-	-	-	-	-	Yale-New Haven Hospital North Haven Medical Center,Ashita Talsania,North Haven,Connecticut,06473,United States,860-482-5384,
				-	-	-	-	-	-	-	-	Eastern Connecticut Hematology and Oncology Associates,Dennis E. Slater,Norwich,Connecticut,06360,United States,860-886-8362,
				-	-	-	-	-	-	-	-	Smilow Cancer Hospital-Orange Care Center,Ashita Talsania,Orange,Connecticut,06477,United States,860-482-5384,
				-	-	-	-	-	-	-	-	Stamford Hospital/Bennett Cancer Center,Salvatore A. Del Prete,Stamford,Connecticut,06904,United States,203-323-8944,
				-	-	-	-	-	-	-	-	Charlotte Hungerford Hospital Center for Cancer Care,Ashita Talsania,Torrington,Connecticut,06790,United States,860-482-5384,
				-	-	-	-	-	-	-	-	Smilow Cancer Hospital Care Center-Trumbull,Ashita Talsania,Trumbull,Connecticut,06611,United States,860-482-5384,
				-	-	-	-	-	-	-	-	Smilow Cancer Hospital at The Harold Leever Regional Cancer Center,Ashita Talsania,Waterbury,Connecticut,06708,United States,860-482-5384,
				-	-	-	-	-	-	-	-	Beebe Medical Center,Gregory A. Masters,Lewes,Delaware,19958,United States,302-733-6227,
				-	-	-	-	-	-	-	-	Christiana Gynecologic Oncology LLC,Gregory A. Masters,Newark,Delaware,19713,United States,302-733-6227,
				-	-	-	-	-	-	-	-	Delaware Clinical and Laboratory Physicians PA,Gregory A. Masters,Newark,Delaware,19713,United States,302-733-6227,
				-	-	-	-	-	-	-	-	Helen F Graham Cancer Center,Gregory A. Masters,Newark,Delaware,19713,United States,302-733-6227,
				-	-	-	-	-	-	-	-	Medical Oncology Hematology Consultants PA,Gregory A. Masters,Newark,Delaware,19713,United States,302-733-6227,
				-	-	-	-	-	-	-	-	Regional Hematology and Oncology PA,Gregory A. Masters,Newark,Delaware,19713,United States,302-733-6227,
				-	-	-	-	-	-	-	-	Christiana Care Health System-Christiana Hospital,Gregory A. Masters,Newark,Delaware,19718,United States,302-733-6227,
				-	-	-	-	-	-	-	-	Beebe Health Campus,Gregory A. Masters,Rehoboth Beach,Delaware,19971,United States,302-733-6227,
				-	-	-	-	-	-	-	-	Nanticoke Memorial Hospital,Gregory A. Masters,Seaford,Delaware,19973,United States,302-733-6227,
				-	-	-	-	-	-	-	-	Christiana Care Health System-Wilmington Hospital,Gregory A. Masters,Wilmington,Delaware,19801,United States,302-733-6227,
[truncated: 56,036 more rows]

[truncated: 1 more sheets: Table S11]
